# Supplementary material for: Genome-wide analysis of codon usage bias in Bovine Coronavirus
Source: Virol J. 2017 Jun 17;14:115. doi: 10.1186/s12985-017-0780-y (PMC5474002; doi:10.1186/s12985-017-0780-y)
Supplement: Supplementary file 2 — Alignment of concatenation of nonstructural and structural ORF’s of Bovine coronaviruses. A fasta file originated using the MUSCLE program [20]. (FAS 378 kb) [file 12985_2017_780_MOESM2_ESM.fas]

>gi|1035470452|gb|KU886219.1|_Bovine_coronavirus_strain_BCV-AKS-01_complete_genome
ATGTCGAAGATCAACAAATACGGTCTCGAACTACACTGGGCTCCAGAATTTCCATGGATGTTTGAGGACACAGAGGAGAAGTTGGACAACCCTAGTAGTTCAGAGGTGGATATAGTATGCTCCACCACTGCGCAAAAGCTGGAAACAGGCGGAATTTGTCCTGAAAATCATGTTATGGTGGATTGTCGCCGACTTCTTAAACAAGAGTGTTGTGTGCAGTCTAGCCTAATACGTGAAATTGTTATGAATACACGTCCATATGATTTGGAAGTGCTACTTCAAGATGCTTTGCAGTCCCGCGAAGCAGTTTTGGTTACACCCCCTCTAGGTATGTCTTTGGAGGCATGCTATGTGAGAGGTTGTAATCCTAATGGATGGACCATGGGTTTGTTTCGGCGTAGAAGTGTTTGTAACACTGGTCGCTGCGCTGTTAACAAGCATGTGGCCTATCAGCTATATATGATTGATCCTGCGGGTGTTTGTTTTGGTGCAGGTCAATTTGTTGGTTGGGTTATACCCTTAGCCTTTATGCCTGTGCAATCCCGGAAATTTATTGTTCCTTGGGTTATGTACTTGCGTAAGTGTGGCGAAAAGGGTGCCTACAACAAAGATCATAAACGTGGCGGTTTTGAACACGTTTATAATTTTAAAGTTGAGGATGCTTACGACCTGGTTCATGATGAGCCTAAGGGTAAGTTTTCTAAGAAGGCTTATGCTTTAATTAGAGGATACCGTGGTGTTAAACCGCTTCTTTATGTAGACCAGTATGGTTGTGATTATACTGGTGGTCTTGCAGATGGCTTAGAGGCTTATGCTGATAAGACATTGCAAGAAATGAAGGCATTATTTCCTATTTGGAGCCAGGAACTCCCTTTTGATGTAACTGTGGCATGGCACGTTGTGCGTGATCCACGTTATGTTATGAGATTGCAGAGTGCTTCTACTATACGTAGTGTTGCATATGTTGCTGACCCTACTGAAGATTTGTGTGATGGTTCTGTTGTTATAAAGGAACCTGTGCATGTTTATGCGGATGACTCTATTATTTTACGTCAACATAATTTAGTTGACATTATGAGTTGTTTTTATACGGAGGCAGATGCAGTTGTAAATGCTTTTTATGGTGTTGATTTGAAAGATTGTGGTTTTGTTATGCAGTTTGGTTATATCGACTGCGAACAAGACTTGTGTGATTTTAAAGGTTGGGTTCCTGGTAATATGATAGATGGTTTTGCTTGCACTACTTGTGGTCATGTTTATGAGACAGGTGATTTGCTAGCACAATCTTCAGGTGTTCTTCCTGTTAATCCTGTATTGCATACTAAGAGTGCAGCAGGTTATGGTGGTTTTGGTTGTAAGGATTCTTTTACCCTGTATGGCCAAACTGTAGTTTATTTTGGAGGTTGTGTGTATTGGAGTCCAGCACGTAATATATGGATTCCTATATTAAAATCTTCTGTTAAGTCTTATGATGGTTTGGTTTATACTGGAGTTGTAGGTTGCAAGGCTATTGTAAAGGAAACAAATCTCATTTGCAAAGCGTTGTACCTTGATTATGTTCAACACAAGTGTGGCAATTTACACCAGCGGGATTTGCTAGGTGTGTCAGATGTGTGGCATAAACAATTGTTATTAAATAGAGGTGTGTACAAACCTCTTTTAGAGAATATTGATTATTTTAATATGCGGCGCGCTAAATTTAGTTTAGAAACTTTTACTGTTTGTGCAGATGGTTTTATGCCTTTTCTTTTAGATGATTTGGTTCCACGCGCATATTATTTGGCAGTAAGTGGTCAAGCATTTTGTGACTACGCAGGTAAAATCTGCCATGCTGTTGTGTCTAAGAGTAAAGAGTTACTTGATGTGTCTCTGGATTCTTTAAGTGCAGCTATACATTATTTGAATTCTAAAATTGTTGATTTGGTTCAACATTTTAGTGATTTTGGAACAAGTTTTGTTTCTAAAATTGTTCATTTCTTTAAGACTTTTACTACTAGCACTGCTCTTGCATTTGCATGGGTTTTATTTCATGTTTTGCATGGTGCTTATATAGTAGTAGAGAGTGATATATATTTTGTTAAAAACATTCCTCGTTATGCTAGTGCTGTTGCACAAGCATTTCGGAGTGTTGCTAAAGTTGTACTGGACTCTTTAAGAGTCACTTTTATTGATGGCCTTTCTTGTTTTAAGATTGGACGTAGAAGAATTTGTCTCTCAGGCAGTAAAATTTATGAAGTTGAGCGTGGTTTGTTACATTCATCTCAATTGCCATTAGATGTTTATGAGTTAACCATGCCTAGTCAAGTTCAGAAAACCAAGCAAAAACCTATTTATTTAAAAGGTTTTGGTTCTGATTTTTCATTAGCGGATAGTGTAGTTGAAGTTGTTACAACTTCACTTACACCATGTGGTTATTCTGAACCACCTAAAGTTGCAGATAAAATTTGCATTGTGGATAATGTTTATATGGCCAAGGCCGGTGACAAATATTACCCTGTTGTGGTTGATGGTCATGTAGGACTCTTGGATCAAGCATGGAGGGTTCCTCGTGCTGGAAGGCATGTTACATTTAAGGAACAGCCTATAGTAAATGAGATTGCAAGCACACCTAAGACTATTAAAGTTTTTTATGAGCTTGACAATGATTTTAATACTATTTTAAACACTGCATGTGGAGTGTTTGAAGTAGATGATACCGTGGATATGGAGGAATTTTATGCTGTGGTGATTGATGCCATTGAAGAGAAACTTTCTCCATGTAAGGAGCTTGAAGGTGTAGGTGCTAAAGTTAGTGCCTTTTTACAGAAATTAGAGGATAATGCCCTATTTTTATTTGATGAGGCTGGCGAGGAAGTTCTTGCCCCTAAATTGTATTGTGCTTTTACAGCTCCTGAAGATGATGACTTTCTTGAAGAAAGTGGTGTTGAAGAAGATGATGTAGAAGGTGAGGAAACTGATTTAACTGTCACAAGTGCTGGAGAGTCTTGTGTTGCCAGTGAACAGGAGGAGTCTTCTGAAATCTTAGAGGACACTTTGGATGATGGTCCATGTGTGGAGACATCTGATTCACAAGTTGAAGAAGATGTAGAAATGTCGGATTTTGCTGATCTTGAATCTGTGATTCAGGATTATGAAAATGTCTGTTTTGAGTTTTATACTACAGAGCCAGAATTTGTTAAAGTTTTGGATCTGTATGTGCCTAAAGCAACTCGCAATAATTGCTGGTTGCGATCAGTTTTGGCAGTGATGCAGAAACTGCCCTGTCAATTTAAAGATAAAAATTTGCAGGATCTTTGGGTGTTATATAAGCAACAGTATAGTCAGTTGTTTGTTGACACCTTGGTTAATAAGATACCTGCTAATATTGTAGTTCCACAAGGTGGTTATGTTGCTGATTTTGCATATTGGTTTTTAACCTTATGTGATTGGCAGTGTGTTGCATACTGGAAATGCATTAAATGTGATTTAGCTCTTAAGCTTAAAGGCTTGGATGCTATGTTCTTTTATGGTGATGTTGTTTCACATGTGTGCAAGTGTGGTGAGTCTATGGTACTTATTGATGTTGATGTACCATTTACAGCCCACTTTGCTCTTAAAGATAAGTTGTTTTGTGCATTTATTACTAAGCGTAGTGTGTATAAAGCAGCTTGTGTTGTGGATGTTAATGATAGTCATTCTATGGCTGTTGTTGATGGTAAACAAATTGATGAACATCGTATCACTAGTATTACTAGTGATAAGTTTGATTTTATTATTGGGCATGGTATGTCATTTTCAATGACTACTTTTGAAATTGCCCAATTGTATGGTTCTTGTATAACACCTAATGTATGTTTTGTTAAAGGTGATATAATTAAAGTTTCTAAGCGTGTTAAAGCAGAAGTCGTTGTAAATCCTGCTAATGGCCATATGGCACATGGTGGTGGTGTTGCAAAGGCTATTGCAGTAGCAGCTGGGCAGCAGTTTGTTAAAGAGACTACCGATATGGTTAAGTCTAAAGGAGTTTGTGCTACTGGAGATTGTTATGTCTCTACAGGGGGCAAATTATGTAAAACTGTGCTTAATGTTGTTGGACCTGATGCGAGAACACAGGGTAAACAAAGTTATGCATTGTTAGAGCGTGTTTATAAACATTTTAACAAATATGATTGTGTTGTTACAACTTTGATCTCAGCTGGTATATTTAGTGTGCCTGCTGATGTGTCTTTAACATATCTACTTGGTACTGCCAAGAAACAAGTTGTTCTTGTTAGCAATAATCAAGAGGATTTTGATCTTATTTCTAAGTGTCAGATAACTGCTGTTGAGGGCACTAAGAAATTGGCAGAGCGTCTTTCTTTTAATGTGGGGCGTTCTATCGTTTACGAAACAGATGCTAATAAGTTGATTTTAAGCAATGATGTTGCATTTGTTTCGACATTTAATGTCTTACAGGATGTTTTATCATTAAGACATGATATAGCACTTGATGATGATGCACGAACCTTTGTTCAGAGCAATGTTGATGTTGTACCTGAGGGTTGGCGTGTTGTCAATAAGTTTTATCAAATTAATGGTGTTAGAACCGTTAAGTATTTTGAGTGTCCCGGTGGCATAGATATATGCAGCCAGGATAAAGTTTTTGGTTATGTACAGCAGGGTAGTTTTAATAAGGCTACTGTTGCTCAAATTAAAGCCTTGTTTTTGGATAAAGTGGACATCTTGCTAACTGTTGATGGTGTTAATTTCATTAACAGGTTTGTGCCTGTAGGTGAAAGTTTTGGTAAGAGTCTAGGAAATGTGTTTTGTGATGGAGTTAATGTTACGAAACATAAGTGTGATATAAATTATAAAGGTAAGGTCTTTTTCCAGTTTGATAATCTTTCTAGTGAAGATTTAAAGGCTGTAAGAAGTTCTTTTAATTTTGACCAAAAGGAATTGCTTGCCTACTACAACATGCTTGTTAATTGTTCTAAGTGGCAGGTTGTTTTTAATGGTAAGTATTTCACTTTTAAGCAAGCTAATAACAATTGTTTTGTTAATGTCTCTTGCTTAATGCTCCAGAGTTTGAATCTGAAATTTAAAATTGTTCAATGGCAGGAGGCGTGGCTTGAATTTCGTTCTGGCCGCCCTGCTAGATTTGTATCTTTGGTTTTGGCCAAAGGTGGGTTTAAATTTGGGGATCCTGCTGATTCTAGAGATTTCTTGCGTGTTGTGTTTAGTCAAGTTGATTTGACAGGGGCAATATGTGATTTTGAAATTGCATGTAAATGTGGTGTAAAGCTGGAACAGCGTACTGGTGTGGACGCTGTTATGCATTTTGGTACATTGAGTCGTGAAGATCTTGAGATTGGTTACACCGTGGATTGTTCTTGCGGTAAAAAGCTAATTCATTGTGTACGATTTGATGTACCATTTTTAATTTGTAGTAATACACCTGCTAGTGTAAAATTACCTAAGGGTGTAGGAAGTGCAAATATTTTTAAAGGTGATAAGGTTGGTCATTATGTTCATGTTAAGTGTGAACAGTCTTATCAGCTTTATGATGCTTCTAATGTTAAGAAGGTCACAGACGTTACTGGCAATTTTTCAGATTGTTTGTATCTTAAAAACTTGAAACAAACTTTTAAATCGGTGTTAACTACCTATTATTTGGATGATGTTAAGAAAATTGAGTATAAACCTGACTTGTCACAATATTATTGTGACGGAGGTAAGTATTATACTCAGCGTATTATTAAAGCCCAATTTAAAACATTTGAGAAAGTAGATGGTGTGTATACTAATTTTAAATTGGTAGGACACACCGTCTGTGATATTCTTAATGCTAAGTTGGGTTTTGATAGCTCTAAAGAGTTTGTTGAATATAAGGTTACTGAGTGGCCAACAGCTACAGGTGATGTGGTGTTGGCTACTGATGATTTATATGTTAAGAGATATGAAAGGGGTTGTATTACTTTTGGTAAACCTGTTATATGGTTGAACCATGAGCAAGCTTCCCTTAATTCTTTAACATATTTTAATAGACCTTTATTGGTTGATGAGAATAAATTTGATGTTTTAAAAGCGGATGATGTTGATGATGGTGGTGACAGCTCAGAGAGTGATGTCAAAGAATCCAAAGAAATTAATATTATTAAGTTAAGTGGTGTTAAAAAACCATTTAGGGTTGAAGATAGTGTCATTGTTAATGATGATATTAGTGAAATCAAATATGTTAAGAGTTTGTCTATAGTCGATGTGTATGATATGTGGCTTACAGGTTGTAGGTATGTTGTTAGGACTGCTAATGCTTTGAGCAGAGCAGTTAATGTACCTACAATACGCAAGTTTATAAAATTTGGTATGACTCTTGTTAGTATACCAATTGATTTATTAAATTTAAGAGAGATTAAGCCTGGTTTTAATGTGGTTAAAGCTATGCGAAATAAAATTTCTGCATGCTTTAATTTTATTAAATGGCTTTTTGTCTTATTATTTGGCTGGATTAAAATATCCGCTGATAATAAAGTAATTTACACCACAGAAGTTGCATCAAAGCTTACGTGTAAGCTTGTAGCTTTAGCTTTTAAAAATGCATTTTTGACATTTAAGTGGAGTGTGGTTGCTAGAGGTGCTTGCATTATAGCGACTATATTTCTATTGTGGTTTAATTTTATATATGCCAATGTAATTTTTAGTGATTTTTATTTGCCTAAAATCGGTTTCTTGCCGACTTTTGTTGGTAAGATCGCACAGTGGATTAAGAACACTTTTAGTCTTGTAACTATTTGTGATCTATATTCCATTCAGGATGTGGGTTTTAAGAATCAGTATTGTAATGGAAGTATTGCATGTCAGTTATGCTTGTCAGGATTTGATATGTTAGATAATTATAAAGCCATTGATGTAGTACAGTATGAAGCTGATAGGAGAGCATTTGTTGATTATACAGGTGTGTTAAAGATTGTCATTGAGTTGATAGTTAGTTACGCCCTGTATACGGCATGGTTCTATCCATTGTTTGCTCTTATTAGTATTCAGATCTTGACCACTTGGCTGCCTGAGCTTTTTATGCTTAGTACATTACATTGGAGTGTTAGGTTGCTGGTGTCTTTAGCTAATATGTTACCAGCACATGTGTTTATGAGGTTTTATATTATTATTGCCTCTTTTATTAAGCTGTTTAGCTTGTTTAGGCATGTTGCCTATGGTTGTAGTAAATCTGGTTGTTTGTTTTGTTATAAGAGGAATCGTAGTCTACGTGTTAAATGTAGTACTATCGTTGGTGGCATGATACGCTATTACGATGTTATGGCTAATGGTGGCACTGGCTTTTGTTCAAAACATCAATGGAATTGCATTGATTGTGATTCTTATAAACCAGGTAACACTTTTATTACTGTTGAGGCCGCTTTTGATTTATCTAAAGAATTGAAACGGCCTATTCAGCCTACAGATGTTGCTTATCATACGGTTACGGATGTTAAGCAAGTTGGTTGTTATATGCGCTTGTTCTATGATCGTGATGGACAGCGCACATATGATGATGTTAATGCTAGTTTGTTTGTGGATTATAGTAATTTGCTACATTCTAAGGTTAAGAGTGTGCCTAATATGCATGTTGTGGTAGTGGAAAATGATGCCGATAAGGCTAATTTTCTTAATGCTGCTGTATTTTATGCACAATCTTTGTTTAGACCTATTTTAATGGTTGATAAAAATCTGATAACTACTGCTAATACTGGTACGTCTGTTACAGAAACTATGTTTGATGTTTATGTGGACACATTTTTGTCTATGTTTGATGTGGACAAAAAGAGTCTTAATGCTTTAATAGCAACTGCGCATTCTTCTATAAAACAGGGTACGCAGATTTGTAAAGTTTTGGATACCTTTTTAAGCTGTGCTCGTAAAAGTTGTTCTATTGATTCAGATGTTGATACTAAGTGTTTAGCTGATTCTGTCATGTCTGCTGTAGCGGCAGGCCTTGAATTGACGGATGAAAGTTGTAATAACTTGGTGCCAACATATTTGAAGGGTGACAACATTGTGGCAGCTGATTTAGGTGTTCTGATTCAAAATTCTGCTAAGCATGTGCAGGGTAATGTTGCTAAAATAGCTGGTATTTCCTGTATATGGTCTGTGGATGCTTTTAATCAGCTTAGTTCTGATTTTCAGCATAAATTGAAGAAAGCATGTTGTAAAACTGGTTTGAAACTGAAGCTTACTTATAATAAGCAGATGGCTAATGTCTCTGTTTTAACTACACCCTTTAGTCTTAAAGGGGGTGCAGTTTTTAGTTATTTTGTTTATGTATGTTTTGTGTTGAGTTTGGTTTGTTTTATTGGATTGTGGTGCTTAATGCCCACTTACACAGTACACAAATCAGATTTTCAGCTTCCCGTTTATGCCAGTTATAAAGTTTTAGATAATGGTGTTATTAGAGATGTTAGCGTTGAAGATGTTTGTTTCGCTAACAAATTTGAACAATTTGATCAATGGTATGAGTCTACATTTGGTTTAAGTTATTATAGTAACAGTATGGCTTGTCCCATTGTTGTTGCTGTAGTAGACCAGGATTTTGGCTCTACTGTGTTTAATGTCCCTACCAAAGTTTTGCGATATGGTTACCATGTGTTGCACTTTATTACACATGCACTTTCTGCTGATGGAGTGCAGTGTTATACGCCACATAGTCAAATATCGTATTTTAATTTTTATGCTAGTGGCTGTGTGCTTTCCTCCGCTTGTACTATGTTTGCAATGGCCGATGGTAGTCCACAACCTTATTGTTATACAGAGGGGCTTATGCAGAACGCTTCTCTGTATAGTTCATTGGTACCTCATGTGCGGTATAATCTTGCTAATGCTAAAGGTTTTATCCGTTTTCCAGAAGTGTTGCGAGAAGGACTTGTGCGTATTGTGCGTACTCGTTCTATGTCGTATTGCAGAGTTGGGTTATGTGAGGAAGCTGATGAGGGTATATGTTTCAATTTTAATGGTTCTTGGGTGATTAATAATGATTATTATAGATCATTGCCAGGGACCTTTTGTGGTAGAGATGTTTTTGACTTAATTTATCAGCTGTTCAAAGGTTTAGCACAGCCTGTGGATTTCTTGGCATTGACTGCTAGTTCTATTGCTGGTGCTATACTTGCTGTAATTGTTGTTTTGGTGTTTTATTACTTAATAAAGCTTAAACGTGCTTTTGGTGATTACACCAGTATTGTTTTTGTTAATGTGATTGTGTGGTGTGTAAATTTTATGATGCTCTTTGTGTTTCAAGTTTATCCTACATTTTCTTGTGTATATGCTATTTGTTATTTTTATGCCACGCTTTATTTCCCTTCGGAGATAAGTGTGATAATGCATTTACAATGGCTAGTTATGTATGGCACTATTATGCCTTTATGGTTTTGTTTGCTATATATATCTGTTGTTGTTTCAAATCATGCTTTTTGGGTATTTTCTTACTGCAGACGGCTTGGTACTTCTGTTCGTAGTGATGGTACATTTGAAGAAATGGCTCTTACTACTTTTATGATTACAAAAGATTCTTATTGTAAGCTTAAGAATTCTTTGTCTGATGTTGCTTTTAATAGATATTTGAGTTTGTATAATAAATATAGGTATTACAGCGGTAAAATGGATACTGCTGCATATAGGGAGGCTGCTTGTTCTCAGTTGGCTAAAGCAATGGATACATTTACCAATAATAATGGTAGTGATGTGCTTTACCAACCACCTACTGCTTCCGTTTCAACTTCATTCTTGCAATCTGGTATTGTGAAAATGGTTAATCCTACTTCTAAGGTAGAACCATGTATTGTCAGCGTTACCTATGGTAATATGACATTGAATGGTTTATGGTTGGATGATAAGGTCTACTGCCCCAGACATGTTATATGTTCTGCTTCAGATATGACTAATCCAGATTATACAAATTTGTTGTGTAGAGTAACATCAAGTGATTTTACTGTATTGTTTGATCGTCTAAGCCTTACAGTGATGTCTTATCAAATGCAGGGTTGTATGCTTGTTCTTACAGTGACCCTGCAAAATTCTCGTACGCCAAAATATACATTTGGTGTGGTTAAACCTGGTGAGACTTTTACTGTTTTAGCTGCTTATAACGGCAAACCACAAGGAGCCTTTCACGTGACTATGCGTAGTAGTTATACCATTAAGGGTTCCTTTTTATGCGGATCTTGTGGATCTGTTGGTTATGTGCTAATGGGTGATTGTGTTAAATTTGTGTATATGCATCAATTGGAGCTTAGTACTGGTTGTCATACTGGTACTGATTTCAATGGGGATTTTTATGGTCCTTATAAGGATGCTCAGGTTGTCCAATTGCCCGTTCAGGATTATATACAATCTGTTAATTTTGTAGCATGGCTTTATGCTGCTATACTTAATAATTGTAATTGGTTTGTACAAAGTGATAAGTGTTCTGTTGAAGATTTTAATGTGTGGGCTTTGTCTAATGGGTTTAGCCAAGTTAAGTCTGATCTTGTTATAGATGCTTTAGCTTCTATGACTGGTGTGTCTTTGGAAACACTATTGGCTGCTATTAAGCGTCTCAAGACTGGTTTTCAAGGACGTCAGATTATGGGTAGTTGCTCCTTTGAGGATGAATTGACACCTAGCGATGTTTATCAACAACTCGCTGGTATCAAGTTACAATCAAAGCGTACTAGATTGGTTAAAGGCATTGTTTGTTGGATTATGACTTCTACATTTTTGTTTAGTTGTATAATTACAGCATTTGTGAAATGGACTATGTTTATGTATGTAACTACTAATATGCTTAGTATTACGTTTTGTGCACTTTGTGTTATAAGTTTGGCCATGTTGTTGGTTAAACATAAGCATCTTTATTTGACTATGTATATAATTCCTGTGCTTTTTACACTGCTGTATAACAACTATTTGGTTGTGTATAAGCAGACATTTAGAGGCTATGTTTATGCATGGCTATCATATTATGTTCCATCAGTTGAGTATACTTATACTGATGAAGTTATTTATGGCATGTTATTGCTTATAGGAATGGTCTTTGTTACATTACGTAGCATTAACCATGATTTGTTTTCTTTTATAATGTTTGTTGGTCGTGTGATTTCTGTTGTCTCTTTGTGGCACATGGGTTCTAACTTAGAGGAAGAAATTCTTCTTATGTTGGCTTCTCTTTTTGGTACTTACACATGGACAACAGCTTTATCTATGGCTGCAGCAAAGGTTATTGCTAAGTGGGTTGCTGTGAATGTTTTGTATTTCACAGATATACCTCAAATTAAGATAGTTCTTGTATGCTATTTGTTTATAGGTTATATTATTAGCTGTTATTGGGGTTTGTTTTCCTTGATGAACAGTTTGTTTAGAATGCCTTTGGGTGTTTATAATTATAAAATTTCAGTACAGGAATTAAGATATATGAATGCTAATGGATTGCGCCCTCCTAAGAATAGTTTTGAAGCCCTTATGCTTAATTTTAAGCTTTTGGGTATTGGAGGTGTGCCAATTATTGAAGTATCTCAATTTCAGTCAAAATTGACTGATGTTAAATGTGCTAATGTTGTCTTGCTTAATTGCTTGCAACATTTGCATGTTGCTTCTAATTCTAAGTTGTGGCAGTATTGTAGCACTTTGCACAATGAAATACTTGCCACTTCTGATCTGGGTGTAGCTTTTGAAAAGCTTGCTCAGTTGTTAATTGTTTTGTTTGCTAATCCAGCTGCTGTGGATAGCAAGTGCCTGATTAGTATTGAAGAAGTTTGCGACGATTACGCAAAGGACAATACTGTTTTGCAGGCTTTACAGAGTGAATTTGTTAATATGGCTAGCTTCGTTGAATATGAAGTTGCTAAGAAAAATCTTGATGAGGCGCGTTCTAGTGGTTCTGCTAATCAACAGCAGTTAAAACAGCTAGAGAAAGCCTGTAATATTGCTAAATCTGCTTATGAACGCGACCGTGCTGTAGCAAGAAAGTTGGAGCGTATGGCAGATTTGGCTCTCACTAATATGTATAAAGAAGCTAGAATTAATGATAAGAAGAGTAAGGTTGTTTCTGCCTTGCAAACTATGCTTTTTAGTATGGTGCGTAAGTTAGATAATCAAGCTCTGAATTCAATATTAGATAATGCTGTGAAGGGTTGTGTACCATTGAATGCAATCCCTTCATTGGCTGCAAATACTCTGACTATAATTGTACCAGATAAAAGTGTTTACGATCAGGTAGTTGACAATGTCTATGTTACCTATGCGGGTAATGTATGGCAGATTCAAACTATCCAAGATTCAGATGGTACAAATAAGCAGTTGAATGAGATATCTGATGGTTGTAACTGGCCACTAGTTATTATTGCAAATCGGCATAATGAGGTATCTGCTACCGTTTTGCAAAATAATGAATTAATGCCTGCTAAGTTGAAAACTCAGGTTGTTAATAGTGGTCCAGATCAGACTTGTAACACACCTACTCAATGTTACTATAATAATAGTAACAATGGGAAGATTGTTTATGCTATACTTAGTGATGTTGATGGTCTTAAGTATACAAAAATTCTTAAAGATGATGGCAATTTTGTTGTTTTGGAGTTAGACCCTCCTTGTAAATTTACTGTTCAAGATGTTAAAGGTCTTAAAATTAAGTACCTTTATTTTGTAAAAGGTTGTAACACACTAGCAAGAGGCTGGGTTGTTGGTACAATTTCTTCTACAGTTAGATTGCAAGCTGGAACTGCTACTGAGTATGCTTCCAACTCATCTATATTATCTTTATGTGCGTTTTCTGTAGATCCTAAGAAAACGTATTTAGATTTTATACAACAGGGAGGAACACCTATTGCCAATTGTGTTAAAATGTTGTGTGACCATGCTGGTACCGGTATGGCCATTACTGTTAAGCCCGATGCTACCACTAATCAGGATTCATATGGTGGTGCGTCTGTTTGTATATATTGCCGCGCACGAGTTGAACACCCAGATGTTGATGGGTTGTGCAAATTACGCGGCAAGTTTGTACAAGTGCCTGTAGGTATAAAAGATCCTGTGTCTTATGTTTTGACACATGATGTTTGTCAAGTTTGTGGATTTTGGCGGGATGGAAGTTGTTCATGTGTTAGCACTGACACTACTGTTCAGTCAAAAGACACTAATTTTTTAAACCGGGGTACGAGTGTAGATGCCCGTCTCGTACCCTGTGCCAGTGGTTTATCTACTGATGTACAATTAAGGGCATTTGATATTTGCAATGCTAGTGTTGCTGGCATTGGTTTACATTTAAAAGTTAATTGCTGCCGTTTTCAGCGTGTTGATGAGAACGGTGATAAATTAGATCAGTTCTTTGTTGTTAAGAGGACAGACCTGACTATATATAATAGAGAGATGGAATGCTATGAGCGTGTAAAAGATTGTAAGTTTGTTGCTGAACACGATTTCTTTACATTTGATGTAGAAGGTAGTCGTGTGCCACATATTGTACGCAAGGATTTAACAAAGTATACTATGTTGGATCTTTGCTATGCGTTGCGACATTTTGATCGCAATGATTGCATGCTGCTTTGTGACATTCTCTCTATATATGCTGGTTGTGAACAATCCTACTTTACTAAGAAGGATTGGTATGATTTTGTTGAAAATCCTGATATTATTAATGTTTATAAAAAGCTAGGACCTATTTTTAATAGAGCCCTAGTTAGCGCTACTGAGTTTGCAGACAAATTGGTGGAGGTAGGCTTAGTAGGCATTTTAACACTTGATAATCAAGATTTAAATGGTAAATGGTATGATTTTGGTGACTATGTTATTGCAGCCCCAGGTTGTGGTGTTGCTATAGCAGACTCTTATTATTCTTATATGATGCCTATGCTGACTATGTGTCATGCATTGGATTGTGAATTGTATGTGAATAATGCTTATAGACTATTTGATCTTGTACAGTATGATTTTACTGATTACAAGCTTGAATTGTTTAATAAGTATTTTAAGCACTGGAGTATGCCATACCATCCTAACACGGTTGATTGTCAGGATGATCGGTGTATTATACATTGTGCTAATTTTAACATACTTTTTAGTATGGTTTTACCTAATACATGTTTTGGGCCTCTTGTTAGGCAAATTTTTGTGGATGGTGTTCCTTTTGTTGTTTCAATTGGATACCATTATAAAGAACTTGGTATTGTGATGAATATGGATGTGGATACACATCGTTATCGCTTGTCTTTAAAAGACTTGCTTTTATATGCTGCTGATCCAGCGTTGCATGTAGCTTCTGCTAGTGCATTGTATGATTTACGCACTTGCTGTTTTAGTGTTGCGGCTATAACAAGCGGTGTAAAATTTCAAACAGTTAAACCTGGTAATTTTAATCAGGATTTTTATGATTTTATTTTAAGTAAGGGCCTGCTTAAAGAGGGTAGTTCAGTTGATTTGAAGCACTTCTTCTTTACGCAGGATGGTAATGCTGCTATTACTGATTATAATTATTATAAGTACAATTTGCCCACCATGGTGGACATTAAGCAGTTGTTGTTTGTTTTGGAAGTTGTTTATAAGTATTTTGAGATTTATGATGGTGGGTGTATACCGGCATCACAAGTCATTGTTAACAATTATGATAAGAGTGCTGGCTATCCATTTAATAAATTTGGAAAAGCCAGGCTCTATTATGAAGCATTATCATTTGAGGAGCAGGATGAAATTTACGCCTATACTAAGCGCAATGTCCTGCCAACACTTACTCAAATGAATTTGAAATATGCTATTAGTGCTAAGAATAGAGCCCGCACTGTTGCTGGTGTTTCCATACTTAGTACTATGACTGGCAGAATGTTTCATCAAAAGTGTTTGAAAAGTATAGCAGCTACACGTGGTGTTCCTGTTGTTATAGGCACCACTAAATTTTATGGCGGCTGGGATGATATGTTACGTCGCCTTATTAAAGATGTTGATAATCCTGTACTTATGGGTTGGGATTATCCTAAGTGTGATCGTGCTATGCCAAACATACTACGTATTGTTAGTAGTCTGGTTTTGGCTCGAAAACATGAGGCATGTTGTTCGCAAAGCGATAGGTTTTATCGACTTGCGAATGAATGCGCACAAGTTCTGAGTGAAATTGTTATGTGTGGTGGCTGTTATTATGTTAAGCCTGGTGGCACTAGTAGTGGTGATGCAACTACTGCTTTTGCTAATTCAGTTTTTAACATATGTCAAGCTGTTTCAGCCAATGTATGTGCTTTAATGTCATGCAATGGTAATAAGATTGAAGATTTGAGTATACGTGCTCTTCAGAAGCGCTTATACTCACATGTGTATAGAAGTGATATGGTTGATTCAACCTTTGTCACAGAATATTATGAATTTTTAAATAAGCATTTTAGTATGATGATTTTGAGTGATGATGGCGTTGTGTGTTATAATTCTGATTATGCGTCCAAAGGGTATATTGCTAATATAAGTGCCTTTCAACAGGTATTATATTATCAAAATAACGTTTTTATGTCAGAATCCAAATGTTGGGTTGAAAATGACATAAACAATGGACCTCATGAATTCTGTTCACAACACACAATGCTTGTAAAGATGGATGGGGACGATGTCTATCTTCCATATCCTGATCCTAGTCGTATATTAGGAGCTGGATGTTTTGTAGATGATTTGTTAAAGACTGATAGCGTTCTTTTAATAGAACGATTTGTAAGTCTTGCAATAGATGCTTATCCACTTGTGTACCACGAAAATGAAGAATACCAAAAGGTTTTTCGTGTTTATTTGGAGTATATAAAGAAGTTGTACAATGACCTGGGTAATCAGATCTTGGATAGCTACAGTGTTATTTTAAGTACTTGTGATGGACAAAAGTTTACTGATGAGTCCTTTTACAAGAACATGTATTTAAGAAGTGCAGTTATGCAGAGTGTTGGAGCTTGCGTTGTCTGCTCTTCTCAAACATCATTACGTTGTGGCAGTTGCATCAGAAAGCCTCTTCTTTGCTGCAAGTGTTGTTACGATCACGTTATGGCAACTGATCATAAATATGTTTTGAGTGTTTCACCATATGTGTGTAACGCACCAGGATGTGATGTAAATGATGTTACCAAATTGTATCTAGGTGGTATGTCATATTATTGTGAAGATCATAAGCCACAATATTCGTTTAAGTTGGTAATGAATGGTATGGTTTTTGGTCTATATAAACAATCTTGTACAGGATCTCCGTACATAGATGATTTTAATCGTATAGCTAGTTGTAAATGGACTGATGTTGATGATTACATACTGGCTAATGAATGTACAGAGCGCTTGAAATTGTTTGCTGCAGAAACGCAAAAGGCGACTGAGGAAGCCTTTAAGCAGAGTTATGCATCAGCAACAATACAAGAGATTGTTAGTGAGCGCGAATTGATCCTCTCTTGGGAGATTGGAAAAGTGAAGCCACCACTTAATAAAAATTATGTTTTTACTGGCTACCATTTTACTAAAAATGGCAAGACAGTTTTAGGTGAGTATGTTTTTGATAAGAGTGAGTTGACTAATGGTGTGTATTATCGCGCCACAACCACTTATAAGCTATCTGTAGGAGATGTTTTTGTTTTAACCTCTCATTCAGTAGCTAATTTAAGTGCTCCTACGCTGGTGCCGCAGGAGAATTATAGTAGTATTAGATTCGCTAGTGTTTATAGTGTGCTTGAGACGTTTCAGAACAATGTCGTTAATTATCAACACATTGGTATGAAACGTTATTGCACCGTGCAAGGACCTCCTGGTACAGGAAAGTCACATCTTGCTATTGGTCTTGCTGTTTATTATTGTACAGCACGTGTAGTATACACTGCGGCCAGCCATGCAGCTGTTGACGCATTGTGTGAAAAAGCATACAAATTTTTGAATATAAATGACTGCACTCGTATTGTTCCTGCCAAGGTCAGGGTGGAGTGCTATGATAAGTTTAAAATTAATGACACCACTCGTAAGTATGTGTTTACTACTATAAATGCATTACCTGAGATGGTGACTGATATCGTTGTTGTAGATGAAGTTAGTATGCTTACCAATTATGAGCTTTCTGTTATTAATGCTCGTATTCGTGCTAAGCATTATGTTTACATTGGTGATCCTGCTCAATTGCCAGCACCACGCGTGTTATTGAGCAAAGGTACACTTGAACCTAAATATTTTAACACTGTTACTAAGCTTATGTGTTGCTTAGGGCCAGACATTTTTCTTGGTACATGTTATAGATGTCCTAAGGAAATTGTTGATACAGTGTCTGCCTTGGTTTATGAAAATAAGCTTAAGGCTAAGAATGAAAGTAGTTCATTGTGTTTTAAGGTCTATTATAAAGGCGTTACAACACATGAAAGTTCTAGTGCTGTAAATATGCAGCAGATTTATTTGATTAATAAGTTTTTGAAGGCTAACCCTTTGTGGCATAAAGCCGTTTTTATTAGCCCATATAATAGCCAGAACTTTGCAGCTAAGCGTGTTTTGGGTTTGCAAACCCAGACCGTGGATTCTGCTCAAGGTTCTGAATATGATTATGTTATATATTCACAGACTGCAGAAACAGCGCATTCTGTAAATGTTAATCGCTTCAATGTTGCTATTACTCGAGCCAAGAAAGGTATTCTTTGTGTTATGAGTAATATGCAGTTGTTTGAAGCATTACAGTTTACTACATTGACCTTAGATAAAGTGCCACAGGCCGTTGAAACGAGAGTTCAATGTAGTACCAATTTATTTAAAGATTGTAGCAAGAGTTATAGTGGTTACCACCCAGCTCACGCTCCTTCATTTTTGGCAGTAGATGACAAATATAAGGCAACTGGCGATTTAGCCGTGTGTCTTGGTATTGGAGATTCTGCTGTTACATATTCAAGATTAATATCACTCATGGGTTTTAAACTTGATGTTACCCTTGATGGGTATTGTAAGCTTTTTATAACTAAAGAAGAAGCTGTTAAACGCGTGCGTGCTTGGGTTGGCTTTGATGCTGAAGGCGCTCATGCCACGCGTGATAGCATTGGGACAAATTTCCCACTTCAATTAGGGTTTTCTACAGGAATTGATTTTGTTGTGGAAGCCACTGGTTTGTTTGCTGATAGAGATGGTTACAGCTTTAAAAAGGCTGTGGCTAAAGCTCCTCCTGGTGAACAATTTAAGCATCTCATCCCTTTGATGACGAGAGGTCAGCGCTGGGATGTTGTTAGACCTAGAATAGTACAAATGTTTGCAGATCATTTAATTGATCTGTCTGATTGTGTTGTGCTAGTTACATGGGCAGCCAACTTTGAGCTCACTTGTCTCCGATACTTTGCAAAAGTAGGTCGTGAGATTTCTTGTAATGTGTGCACTAAACGTGCCACAGCTTACAATTCTAGAACTGGTTACTATGGTTGTTGGCGCCATAGTGTTACATGTGATTACTTGTATAATCCACTTATTGTTGATATTCAACAGTGGGGATATATTGGATCTTTATCAAGTAATCATGATTTATATTGTAGTGTCCACAAGGGAGCACATGTTGCTTCATCTGATGCTATAATGACACGGTGTTTGGCCGTTTATGATTGTTTTTGCAATAATATTAATTGGAATGTGGAGTATCCCATTATTTCAAATGAGTTAAGTATTAATACCTCTTGTAGGGTCTTGCAGCGCGTTATGCTTAAAGCTGCAATGCTCTGCAACAGATATACTTTGTGTTATGATATTGGCAACCCAAAAGCGATTGCCTGTGTCAAAGATTTTGATTTTAAGTTCTATGATGCCCAACCAATTGTTAAGTCTGTCAAGACTCTTTTGTATTCTTTTGAGGCACATAAGGACTCTTTTAAAGATGGTTTGTGTATGTTCTGGAACTGTAATGTGGATAAGTATCCACCGAATGCAGTTGTATGTAGATTTGACACGAGAGTGTTGAATAATTTAAATCTTCCTGGCTGTAATGGAGGTAGTTTGTATGTTAATAAACATGCATTCCACACTAAACCCTTTTCTAGGGCAGCCTTTGAGCATTTGAAGCCTATGCCATTTTTTTATTATTCAGATACGCCTTGCGTGTATATGGATGGCATGGATGCTAAGCAGGTTGATTATGTACCTTTGAAATCCGCCACTTGCATCACAAGATGCAATTTAGGTGGTGCAGTTTGTTTAAAACATGCTGAAGAGTATCGTGAGTACCTAGAGTCTTACAATACAGCTACTACAGCAGGTTTTACTTTTTGGGTCTATAAGACATTTGATTTTTATAATTTGTGGAATACGTTCACCAAGCTACAAAGCTTGGAGAACGTTGTATATAATTTAGTTAAAACTGGTCATTATATAGGACAGGCTGGTGAAATGCCTTGTGCCATTATAAATGATAAAGTCGTGGCTAAGATCGATAAGGAGGATGTTGTCATTTTTATTAATAATACAACATACCCTACTAATGTGGCTGTTGAATTATTTGCCAAGCGCAGTATTCGACACCATCCAGAGCTTAAGCTCTTTAGAAATTTGAATATAGACGTGTGTTGGAAGCACGTCATTTGGGATTATGCTAGAGAAAGTATATTTTGCAGTAATACCTATGGTGTCTGCATGTATACAGATTTAAAGTTCATTGATAAATTGAATGTCCTTTTTGATGGTCGTGATAATGGTGCTCTTGAAGCTTTTAAACGCTCTAATAATGGCGTTTACATTTCCACGACAAAAGTTAAGAGTCTTTCGATGATAAAAGGTCCACCGCGTGCTGAATTAAATGGCGTAGTGGTGGACAAGGTTGGAGACACTGATTGTGTGTTTTATTTTGCTGTGCGTAAGGATGGTCAGGATGTCATCTTCAGCCAATTCGACAGCCTGAGAGTCAGCTCTAACCAGAGCCCACAAGGTAATCTGGGGAGTAATGAACCCGGTAATGTCGGTGGTAATGATGCTCTGGCAACCTCCACTATCTTTACACAAAGCCGTGTTATTAGCTCTTTTACATGTCGTACTGATATGGAAAAAGATTTTATAGCTTTAGATCAAGACTTGTTTATTCAGAAGTATGGTTTGGAGGACTATGCCTTTGAACACATTGTTTATGGTAATTTCAACCAGAAGATTATTGGTGGTTTGCATTTGTTAATAGGCTTGTACCGAAGACAGCAAACTTCCAATCTGGTTATTCAGGAGTTTGTTTCATACGACTCCAGCATACACTCTTATTTTATCACTGATGAGAAGAGTGGTGGTAGTAAGAGTGTTTGCACTGTTATAGATATTTTGTTGGATGATTTTGTGGCTCTTGTTAAGTCACTTAATCTCAACTGTGTGAGTAAGGTTGTTAACGTTAATGTTGATTTTAAAGATTTTCAGTTCATGCTTTGGTGTAACGATGAGAAAGTTATGACTTTCTATCCTCGTTTGCAAGCTGCATCTGACTGGAAGCCTGGTTATTCTATGCCTGTATTATACAAGTATTTGAATTCCCCAATGGAAAGAGTTAGTCTCTGGAATTATGGGAAGCCGATTACTTTGCCTACAGGCTGTATGATGAATGTTGCTAAGTATACTCAGTTATGTCAATATCTGAATACTACAACATTAGCTGTACCTGTTAATATGCGAGTTTTGCATTTAGGTGCAGGTTCAGAAAAAGGAGTAGCACCGGGTTCTGCAGTTCTTAGGCAGTGGTTGCCTGCTGGTACTATTCTTGTAGATAATGATTTATACCCATTTGTGAGTGACAGTGTCGCTACATATTTTGGGGATTGTATAACCTTACCCTTTGATTGTCAATGGGATTTGATAATTTCTGATATGTATGACCCTATTACTAAGAACATAGGGGAGTACAATGTAAGTAAAGATGGTTTCTTTACATACATTTGTCATATGATTCGCGACAAGTTAGCTCTGGGTGGCAGTGTTGCTATAAAAATAACAGAGTTTTCTTGGAATGCAGAATTATATAGGTTAATGGGGTATTTTGCATTTTGGACGGTTTTCTGCACAAATGCAAACGCTTCTTCTAGTGAAGGGTTTTTAATTGGCATAAATTATTTGGGTAATCCCAAGGTTGAGATAGATGGAAATGTTATGCATGCCAATTATTTGTTCTGGAGAAATTCCACAGTTTGGAATGGGGGTGCTTATAGCCTGTTTGACATGGCTAAATTCCCGCTCAAGTTGGCTGGTACTGCCGTAATAAATTTAAGAGCAGACCAGATTAATGATATGGTTTATTCCCTTCTTGAAAAGGGTAAACTACTTGTTAGAGATACAAATAAAGAAGTTTTTGTTAGTGACAGTTTGGTTAATGTAATCATGGCAGTCGCTTATGCAGACAAGCCTAACCACTTTATCAATTTTCCACTTACCCAGTTTCAGGGTTTTGTGTTAAATTATAAAGGTTTACAATTTCAACTTCTCGATGAAGGAGTGGATTGTAAAATACAAACAGCGCCTCACATTAGTCTTGCTATGCTGGATATTCAGCCTGAAGACTACAGAAGTGTTGATGTCGCTATTCAAGAAGTTATTGATGATATGCATTGGGGTGAGGGCTTTCAGATTAAATTTGAAAAACCCCATATCCTAGGAAGATGCATAGTTTTAGATGTTAAAGGTCTAGAAGAATTGCATGATGATTTAGTTAATTACATTCGTGATAAAGGTTGTGTTGCTGACCAATCCAGGAAGTGGATTGGACATTGCACCATAGCCCAACTCACTGATGCTGCACTTTCCATTAAGGAAAATGTTGATTTTATAAACAGCATGCAATTCAACTATAAAATCACTATCAATCCCTCATCACCGGCTAGAATTGAAATAGTTAAGCTTGGTGCTGAAAAGAAAGTTGGTTTTTATGAAACCATAGCTAGCCACTGGATGGGAATTCGTTTTGAATACAATCCACCCACTGACAAGCTAGCTACGATTATGGGTTATTGTTGTTTAGAAGTGGTGCGTAAAGAGCTAGAAGAAGGTGACCTTCCCGAGAATGATGATGATGCTTGGTTTAAGCTATCGTACCATTATGAAAACAATTCTTGGTTCTTTCGACATGTCTACAGGAAAAGTTCTTATTTCCGTAAGTCTTGTCAAAATTTAGATTGTAATTGTTTGGGGTTTTATGAATCTTCAGTTGAAGAAGACATGTTTTTGATACTTTTAATTTCCTTACCAACGGCTTTTGCTGTTATAGGAGATTTAAAGTGTACTACAGTTTCCATTAATGATGTTGACACTGGTGTTCCTTCTATTAGCACTGATACTGTCGATGTTACTAATGGTTTAGGCACTTATTATGTTTTAGATCGTGTGTATTTAAATACTACGTTGTTGCTTAATGGTTATTACCCTACTTCAGGTTCTACATATCGTAATATGGCACTGAAGGGAACTTTACTATTGAGCACACTGTGGTTCAAACCACCTTTTCTTTCTGACTTTACTAATGGTATTTTTGCTAAGGTCAAAAATACCAAGGTTATTAAAGATGGTGTAAAGTATAGTGAGTTTCCTGCTATAACTATAGGTAGTACTTTTGTAAATACATCCTATAGTGTGGTAGTACAACCACATACTACCAATTTGGATAATAAATTACAAGGTTTCCTAGAGATCTCTGTTTGCCAGTATACTATGTGCGAGTACCCAAATACGATTTGTCATCCTACTCTGGGTAATCAACGCGTAGAACTATGGCATTGGGATACAGGTGTTGTTTCCTGTTTATATAAGCGTAATTTCACATATGATGTGAATGCTGATTATTTGTATTTCCATTTTTATCAAGAAGGTGGTACTTTTTATGCATATTTTACAGACACTGGTGTTGTTACTAAGTTTCTGTTTAATGTTTATTTAGGCACGGTGCTTTCACATTATTATGTCATGCCTTTGACTTGTAATAGTGCTATGACTTTAGAATATTGGGTTACACCTCTCACTTCTAAACAATATTTATTAGCTTTCAATCAAGATGGCGCTATTTTTAATGCTGTTGATTGTAAGAGCGATTTTATGAGTGAGATTAAGTGTAAAACACTATCTATAGCACCATCTACTGGTGTTTATGAATTAAACGGTTACACTGTTCAGCCAATTGCAGATGTTTACCGACGTATACCTAATCTCCCCGATTGTAATATTGAGGCTTGGCTTAATGATAAGTCGGTGCCCTCTCCATTAAATTGGGAACGTAAGACTTTTTCAAATTGTAATTTTAATATGAGCAGCCTGATGTCTTTTATTCATGCAGACTCTTTTACTTGTAATAATATTGATGCTGCTAAGATATATGGTATGTGTTTTTCCAGCATAACTATAGATAAGTTTGCAATACCCAATGGTAGGAAGGTTGACCTACAATTGGGTAATTTGGGTTATTTGCAGTCTTTTAACTATAGAATTGATACTACTGCTACAAGTTGTCAGTTGTATTATAATTTACCTGCTGCTAATGTTTCTGTTAGCAGGTTTAATCCTTCTACTTGGAATAGGAGATTTGGTTTTACAGAACAATCTGTTTTTAAGCCTCAACCTGCAGGTGTTTTTACTGATCATGATGTTGTTTATGCACAACATTGTTTTAAAGCTCCCACAAATTTCTGTCCGTGTAAATTGGATGGGTCTTTGTGTGTAGGTAGTGGTTCTGGTATAGATGCTGGTTATAAACATACTGGTATAGGTACTTGTCCTGCAGGTACTAATTATTTAACTTGCCATAATGCTGCCCAATGTGATTGTTTGTGCACTCCAGACCCCATTATATCTAAAGCTACAGGGTCTTATAAGTGCCCCCAAACTAAATATTTAGTTGGCATAGGTGAGCACTGTTCGGGTCTTGCTATTAAAAGTGATCATTGTGGAGGTAACCCTTGCAGTTGCCAACCACAAGCATTTTTGGGTTGGTCTGTTGACTCTTGTTTACAAGGGGATAGGTGTAATATTTTTGCTAATTTTATTTTGCATGATGTTAATAGTGGTACTACTTGTTCTACTGATTTACAAAAATCAAACACAGACATAATTCTTGGTGTTTGTGTTAATTATGATCTTTATGGTATTACTGGCCAAGGGATTTTTGTTGAGGTTAATGCGACTTATTATAATAGTTGGCAGAACCTTTTATATGATTCTAATGGTAATCTCTACGGTTTTAGAGATTACTTAACAAATAGAACTTTTATGATTCGTAGTTGCTATAGTGGTCGTGTTTCAGCGGCCTTTCATGCTAACTCTTCCGAACCAGCATTGCTATTTCGGAATATCAAATGCAATTACGTTTTTAATAACACTCTTTTACGACAGCTGCAACCTATTAACTATTTTGATAGCTATCTTGGTTGTGTTGTCAATGCTGATAATAGTACTTCTAGTGTTGTTCAAACATGTGATCTCACAGTAGGTAGTGGTTACTGTGTGGATTACTCTACAAAAAGACGAAGTCGTAGATCGATTACCACTGGTTATCGGTTTACTAATTTTGAGCCATTTACTGTTAATTCAGTAAATGATAGTTTAGAACCTGTAGGCGGTTTGTATGAAATTCAAATACCTTCAGAGTTTACTATAGGTAATATGGAGGAGTTTATTCAAACAAGCTCTCCTAAAGTTACTATTGATTGTTCTGCTTTTGTCTGTGGTGATTATGCAGCATGTAAATCACAGTTGGTTGAATATGGTAGCTTCTGTGACAATATTAATGCTATACTCACAGAAGTAAATGAATTACTTGACACTACACAGTTGCAAGTAGCTAATAGTTTAATGAATGGTGTCACTCTTAGCACTAAGCTTAAAGATGGCGTTAATTTCAATGTAGACGACATCAATTTTTCCCCTGTATTAGGTTGTTTAGGAAGCGATTGCAATAAAGTTTCCAGTAGATCTGCTATAGAGGACTTACTTTTTTCTAAAGTAAAGTTAGCTGATGTCGGTTTTGTTGAGGCTTATAATAATTGTACTGGAGGTGCCGAAATTAGGGACCTCATTTGTGTGCAAAGTTATAATGGTATCAAGGTGTTGCCTCCACTGCTCTCAGAAAATCAGATCAGTGGTTACACTTTGGCTGCCACCTCTGCTAGCCTGTTTCCTCCATGGTCAGCAGCAGCAGGTGTACCATTCTATTTAAATGTTCAGTATCGTATTAATGGTATTGGTGTTACCATGGATGTGCTAAGTCAAAATCAAAAGCTTATTGCTAATGCATTTAACAATGCTCTTGGTGCTATTCAGGAAGGGTTTGATGCTACCAATTCTGCTTTAGTTAAAATTCAAGCTGTTGTTAATGCAAATGCTGAAGCTCTTAATAACTTATTGCAACAACTCTCTAATAGATTTGGTGCTATAAGTTCTTCTTTACAAGAAATTCTATCTAGACTGGACGCTCTTGAAGCGCAAGCTCAGATAGACAGACTTATTAATGGGCGTCTTACCGCTCTTAATGCTTATGTTTCTCAACAGCTTAGTGACTCTACACTAGTAAAGTTTAGTGCAGCACAAGCTATGGAGAAGGTTAATGAATGTGTTAAAAGCCAATCATCTAGGATAAATTTTTGTGGTAATGGTAATCATATTATATCATTAGTGCAGAATGCTCCATATGGTTTGTATTTTATCCACTTTAGCTATGTCCCTACTAAGTATGTCACTGCGAAGGTTAGTCCCGGCCTGTGCATTGCTGGTGATAGAGGTATAGCCCCTAAGAGTGGTTATTTTGTTTATGTAAATAATACTTGGATGTTCACTGGTAGTGGTTATTACTACCCTGAACCTATAACTGGAAATAATGTTGTTGTTATGAGTACCTGTGCTGTTAATTACACTAAAGCACCGGATGTAATGCTGAACACTTCAGTACCCAACCTCCCTGATTTTAAGGAAGAGTTGGATCAATGGTTTAAAAACCAAACATCAGTGGCACCAGATCTGTCACTTGATTATATAAATGTTACATTCTTGGACCTACAAGATGAAATGAATAGGTTACAGGAGGCAATAAAAGTTTTAAATCAGAGCTACATCAATCTCAAGGACATTGGTACATATGAGTATTATGTAAAATGGCCTTGGTATGTATGGCTTTTAATTGGCTTTGCTGGTGTAGCTATGCTTGTTTTACTATTCTTCATATGCTGTTGTACAGGATGTGGGACTAGTTGTTTTAAGAAATGTGGTGGTTGTTGTGATGATTATACTGGACACCAGGAGTTAGTAATTAAAACATCACATGAAGACATGTTTTTGCTTCCTAGATTTGTTCTAGTTAGCTGCATAATTGGTAGCCTAGGTTTTGATAACCCTCCTACCAATGTTGTTTCGCATTTAAATGGAGATTGGTTTTTATTTGGTGACAGTCGTTCAGATTGTAATCATGTTGTTACTACCAATCCCCGTAATTATTCTTATATGGACCTTAATCCTGCCTTGTGTAGTTCTGGTAAAATATCATCTAAAGCTGGCAACTCCATTTTTAGGAGTTTTCACTTTACCGATTTTTATAATTACACAGGCGAAGGTCAACAAATTATTTTCTATGAGGGTGTTAATTTTACGCCTTATCATGCCTTTAAATGCACCACTTCTGGTAGTAATGATATTTGGATGCAGAATAAAGGCTTGTTTTACACTCAGGTTTATAAGAATATGGCTGTGTATCGCAGTCTTACTTTTGTTACTGTACCATATGTTTACAATGGCTCTGCACAATCTACAGCTCTTTGTAAATCTGGTAGTTTAGTTCTTAATAACCCCGCCTATATTGCTCGTGAAGCTAATGTGGGTGATTATTATTATAAGGCTGAAGCTGATTTTTATTTGTCAGGTTGTGACGAGTATATCGTACCACTTTGTATTTTTAACGGCAAGTTTTTGTCGAATACAAAGTATTATGATGATAGTCAATATTATTTTAATAAAGACACTGGTGTTATTTATGGTCTCAATTCTACTGAAACCATTACCACTGGTTTTGACTTTAATTGTCATTATTTAGTTCTACCCTCTGGTAATTATTTAGCCATTTCAAATGAGCTATTGTTAACTGTTCCCACTAAAGCAATCTGTCTTAATAAGCGTAAGGATTTTACGCCTGTACAGGTTGTTGATTCGCGGTGGAACAATGCCAGGCAGTCTGATAACATGACGGCAGTTGCTTGTCAACCCCCGTACTGTTATTTTCGTAATTCTACTACCAATTATGTTGGTGTTTATGATATCAATCATGGGGATGCTGGTTTTACTAGCATACTCAGTGGTTTGTTATATGACTCACCTTGTTTTTCGCAGCAAGGTGTTTTTAGGTATGATAATGTTAGCAGTGTCTGGCCTCTCTACTCTTATGGCAGATGCCCTACTGCTGCTGATATTAATACCCCTGATGTACCTATTTGTGTGTATGATCCGCTACCAATTATTTTGCTTGGCATTCTTTTGGGTGTTGCGGTCATAATTATTCTAGTTTTGTTGTTATATTTTATGGTGGATAATGGTACTAGGCTGCATGATGCTATGTTTATGGCTGATGCTTATTTTGCAGACACTGTGTGGTATGTGGGGCAAATAATTTTTATAGTTGCCATTTGTTTATTGGTTATAATAGTTGTAGTGGCATTTTTGGCAACTTTTAAATTGTGTATTCAACTTTGCGGTATGTGTAATACCTTAGTACTGTCCCCTTCTATTTATGTGTTTAATAGAGGTAGGCAGTTTTATGAGTTTTACAATGATGTAAAACCACCAGTTCTTGATGTGGATGACGTTATGAGTAGTGTAACTACACCAGCACCAGTTTACACCTGGACTGCTGATGAAGCTATTAAATTCCTAAAGGAATGGAACTTTTCTTTGGGTATTATACTACTTTTTATTACAGTCATATTGCAATTTGGATATACAAGTCGCAGTATGTTTGTTTATGTTATTAAGATGATCATTTTGTGGCTTATGTGGCCCCTTACTATCATCTTAACTATTTTCAATTGCGTGTATGCGTTGAATAATGTGTATCTTGGCTTCTCTATAGTTTTTACTATAGTGGCCATTATCATGTGGATTGTGTATTTTGTGAATAGTATCAGGTTGTTTATTAGAACTGGAAGTTGGTGGAGTTTCAACCCAGAAACAAACAACTTGATGTGTATAGATATGAAGGGAAGGATGTATGTTAGGCCGATAATTGAGGACTACCATACCCTTACGGTCACAATAATACGTGGTCATCTTTACATGCAAGGTATAAAACTAGGTACTGGCTATTCTTTGTCAGATTTGCCAGCTTATGTGACTGTTGCTAAGGTTTCACACCTGCTCACGTATAAGCGTGGTTTTCTTGACAAGATAGGCGATACTAGTGGTTTTGCTGTTTATGTTAAGTCCAAAGTCGGTAATTACCGACTGCCATCAACCCAAAAGGGTTCTGGCATGGACACCGCATTGTTGAGAAATAATATCATGTCTTTTACTCCTGGTAAGCAATCCAGTAGTAGAGCGTCCTCTGGAAATCGTTCTGGTAATGGTATCCTTAAGTGGGCCGATCAGTCCGACCAATCTAGAAATGTTCAAACCAGGGGTAGAAGAGCTCAACCCAAGCAAACTGTCACTTCTCAGCAACCAGCAGGAGGGAATGTTGTACCCTACTATTCTTGGTTCTCTGGAATTACTCAGTTTCAAAAGGGAAAGGAGTTTGAATTTGCAGAGGGACAAGGTGTGCCTATTGCACCAGGAGTCCCAGCTACTGAAGCTAAGGGGTACTGGTACAGACACAACAGACGTTCTTTTAAAACAGCCGATGGCAACCAGCGTCAATTGCTCCCACGATGGTATTTTTACTATCTTGGAACTGGACCGCATGCCAAAGACCAGTATGGCACCGACATTGACGGAGTCTTCTGGGTCTCTAGTAACCAGGCTGATGTCAATACCCCGGCTGACATTCTCGATCGGGACCCAAGTAGCGATGAGGCTATTCCGACTAGGTTTCCGCCTGGCACGGTACTCCCTCAGGGTTACTATATTGAAGGCTCAGGAAGGTCTGCTCCTAATTCCAGATCTACTTCACGCGCTTCCAGTAGAGCCTCTAGTGCAGGATCGCGTAGCAGAGCCAATTCTGGAAATAGAACCCCTACCTCTGGTGTAACACCTGATATGGCTGATCAAATTGCTAGTCTTGTTCTGGCAAAACTTGGCAAGGATGCCACTAAGCCACAGCAAGTAACTAAGCAGACTGCCAAAGAAATCAGACAGAAAATTTTGAATAAACCCCGCCAGAAGAGGAGCCCCAATAAACAATGCACTGTTCAGCAGTGTTTTGGGAAGAGAGGCCCCAATCAGAATTTTGGTGGCGGAGAAATGTTAAAACTTGGAACTAGTGACCCACAGTTCCCCATTCTTGCAGAACTCGCACCCACAGCTGGTGCGTTTTTCTTTGGATCAAGATTAGAGTTGGCCAAAGTGCAGAATTTGTCTGGGAATCTTGATGAGCCCCAGAAGGATGTTTATGAATTGCGCTACAATGGCGCAATTCGATTTGATAGTACACTTTCAGGTTTTGAGACCATAATGAAGGTGTTGAATGAGAATTTGAATGCATATCAACAACAAGATGGTATGATGAATATGAGTCCAAAACCACAGCGTCAGCGTGGTCAGAAGAATGGACAAGGAGAAAATGATAATATAAGTGTTGCAGCGCCCAAAAGCCGTGTGCAGCAAAATAAGAGTAGAGAGTTGACTGCAGAGGACATCAGCCTTCTTAAGAAGATGGATGAGCCCTTTACTGAAGACACCTCAGAAATA
>gi|18033971|gb|AF391542.1|_Bovine_coronavirus_isolate_BCoV-LUN_complete_genome
ATGTCGAAGATCAACAAATACGGTCTCGAACTACACTGGGCTCCAGAATTTCCATGGATGTTTGAGGACGCAGAGGAGAAGTTGGACAACCCTAGTAGTTCAGAGGTGGATATAGTATGCTCCACCACTGCGCAAAAGCTGGAAACAGGCGGAATTTGTCCTGAAAATCATGTGATGGTGGATTGTCGCCGACTTCTTAAACAAGAATGTTGTGTGCAGTCTAGCCTAATACGTGAAATTGTTATGAATACACGTCCATATGATTTGGAGGTGCTACTTCAAGATGCTTTGCAGTCCCGCGAAGCAGTTTTGGTTACACCCCCTCTAGGTATGTCTCTGGAGGCATGCTATGTGAGAGGTTGTAATCCTAATGGATGGACCATGGGTTTGTTTCGGCGTAGAAGTGTGTGTAACACTGGTCGCTGCGCTGTTAACAAGCATGTGGCCTATCAGCTATATATGATTGATCCTGCGGGTGTCTGTTTTGGTGCAGGTCAATTTGTGGGTTGGGTTATACCCTTAGCCTTTATGCCTGTGCAATCCCGGAAATTTATTGTTCCTTGGGTTATGTACTTGCGTAAGTGTGGCGAAAAGGGTGCCTACAACAAAGATCATAAACGTGGCGGTTTTGAACACGTTTATAATTTTAAAGTTGAGGATGCTTACGACTTGGTTCATGATGAGCCTAAGGGTAAGTTTTCTAAGAAGGCTTATGCTTTAATTAGAGGATACCGTGGTGTTAAACCGCTTCTTTATGTAGACCAGTATGGTTGTGATTATACTGGTGGTCTTGCAGATGGCTTAGAGGCTTATGCTGATAAGACATTGCAAGAAATGAAGGCATTATTTCCTATTTGGAGCCAGGAACTCCCTTTTGATGTAACTGTGGCATGGCACGTTGTGCGTGATCCACGTTATGTTATGAGACTGCAGAGTGCTTCTACTATACGTAGTGTTGCATATGTTGCTAACCCTACTGAAGACTTGTGTGATGGTTCTGTTGTCATAAAGGAACCTGTGCATGTTTATGCGGATGACTCTATTATTTTACGTCAACATAATTTAGTTGACATTATGAGTTGTTTTTATATGGAGGCAGATGCAGTTGTAAATGCTTTTTATGGTGTTGATTTGAAAGATTGTGGTTTTGTTATGCAGTTTGGTTATATTGACTGCGAACAAGACTTGTGTGATTTTAAAGGTTGGGTTCCTGGTAATATGATAGATGGTTTTGCTTGCACTACTTGTGGTCATGTCTATGAGACAGGTGATTTGCTAGCACAATCTTCAGGTGTTCTGCCTGTTAATCCTGTATTGCATACTAAGAGTGCAGCAGGTTATGGTGGTTTTGGTTGTAAGGATTCTTTTACCCTGTATGGCCAAACTGTAGTTTATTTTGGAGGTTGTGTGTATTGGAGTCCAGCACGTAATATATGGATTCCTATATTAAAATCTTCTGTTAAGTCTTATGACGGTTTGGTTTATACTGGAGTTGTAGGTTGCAAGGCTATTGTAAAGGAAACAAATCTCATTTGCAAAGCGTTGTACCTTGATTATGTTCAACACAAGTGTGGCAATTTACACCAGCGGGAGTTGCTAGGTGTGTCAGATGTGTGGCATAAACAATTGTTATTAAATAGAGGTGTGTACAAACCTCTTTTAGAGAATATTGATTATTTTAATATGCGGCGCGCTAAATTTAGTTTAGAAACTTTTACTGTTTGTGCAGATGGTTTTATGCCTTTTCTTTTAGATGATTTGGTTCCGCGCGCATATTATTTGGCAGTAAGTGGTCAAGCATTTTGTGACTACGCAGATAAAATCTGCCATGCTGTTGTGTCTAAGAGTAAAGAGTTACTTGATGTGTCTCTGGATTCTTTAAGTGCAGCTATACATTATTTGAATTCTAAAATTGTTGATTTGGCTCAACATTTTAGTGATTTTGGAACAAGTTTTGTTTCTAAAATTGTTCATTTCTTTAAGACTTTTACTACTAGCACTGCTCTTGCATTTGCATGGGTTTTATTTCATGTTTTGCATGGTGCTTATATAGTAGTAGAGAGTGATATATATTTTGTTAAAAACATTCCTCGTTATGCTAGTGCTGTTGCACAAGCATTTCGGAGTGTTGCTAAAGTTGTACTGGACTCTTTAAGAGTTACTTTTATTGATGGCCTTTCTTGTTTTAAGATTGGACGTAGAAGAATTTGTCTCTCAGGCAGTAAAATTTATGAAGTTGAGCGTGGCTTGTTACATTCATCTCAATTGCCATTAGATGTTTATGATTTAACCATGCCTAGTCAAGTTCAGAAAGCCAAGCAAAAACCTATTTATTTAAAAGGTTCTGGTTCTGATTTTTCATTAGCAGATAGTGTGGTTGAAGTTGTTACAACTTCACTTACACCATGTGGTTATTCTGAACCACCTAAAGTTGCAGATAAAATTTGCATTGTGGATAATGTTTATATGGCCAAGGCTGGTGACAAATATTACCCTGTTGTGGTTGATGGTCATGTAGGACTCTTGGATCAAGCATGGAGGGTTCCTTGTGCTGGAAGGCGTGTTACATTTAAGGAACAGCCTACAGTAAATGAGATTGCAAGCACACCTAAGACTATTAAAGTTTTTTATGAGCTTGACAAAGATTTTAATACTATTTTAAACACTGCATGTGGAGTGTTTGAAGTAGATGATACCGTGGATATGGAGGAATTTTATGCTGTGGTGGTTGATGCCATAGAAGAGAAACTTTCTCCATGTAAGGAGCTTGAAGGTGTAGGTGCTAAAGTTAGTGCCTTTTTACAGAAATTAGAGGATAATTCCCTATTTTTATTTGATGAGGCTGGCGAGGAAGTTCTTGCTTCTAAATTGTATTGTGCTTTTACAGCTCCTGAAGATGATGACTTTCTTGAAGAAAGTGGTGTTGAAGAAGATGATGTAGAAGGTGAGGAAACTGATTTAACTGTCACAAGTGCTGGAGAGCCTTGTGTTGCCAGTGAACAGGAGGAGTCTTCTGAAATCTTAGAGGACACTTTGGATGATGGTCCATGTGTGGAGACATCTGATTCACAAGTTGAAGAAGATGTAGAAATGTCGGATTTTGCTGATCTTGAATCTGTGATTCAGGATTATGAAAATGTTTGTTTTGAGTTTTATACTACAGAGCCAGAATTTGTTAAAGTTTTGGATCTGTATGTGCCTAAAGCAACTCGCAACAATTGCTGGTTGCGATCAGTTTTGGCAGTGATGCAGAAACTGCCCTGTCAATTTAAAGATAAAAATTTGCAGGATCTTTGGGTGTTATATAAGCAACAGTATAGTCAGTTGTTTGTTGATACCTTGGTTAATAAGATACCTGCTAATATTGTAGTTCCACAAGGTGGTTATGTTGCCGATTTTGCATATTGGTTCTTAACCTTATGTGATTGGCAGTGTGTTGCATACTGGAAATGCATTAAATGTGATTTAGCTCTTAAGCTTAAAGGCTTGGATGCTATGTTCTTTTATGGTGATGTTGTCTCACATGTGTGCAAGTGTGGTGAGTCTATGGTACTTATTGATGTTGATGTGCCATTTACAGCCCACTTTGCTCTTAAAGATAAGTTGTTTTGTGCATTTATTACTAAGCGTAGTGTGTATAAAGCAGCTTGTGTTGTGGATGTTAATGATAGTCATTCTATGGCTGTTGTTGATGGTAAACAAATTGATGATCATCGTGTCACTAGTATTACTAGTGATAAGTTTGATTTTATTATTGGGCATGGTATGTCATTTTCAATGACTACTTTCGAAATTGCCCAATTGTATGGTTCTTGTATAACACCTAATGTATGTTTTGTTAAAGGTGATATAATTAAAGTTTCTAAGCGTGTTAAAGCAGAAGTCGTTGTAAATCCTGCTAATGGCCATATGGCACATGGTGGTGGTGTTGCAAAGGCTATTGCAGTAGCAGCTGGACAGCAGTTTGTTAAAGAGACTACCGATATGGTTAAGTCTAAAGGAGTTTGTGCTACTGGAGACTGTTATGTCTCTACAGGGGGTAAATTATGTAAAACTGTGCTTAATGTTGTTGGACCTGATGCGAGAACACAGGGTAAACAAAGTTATGCATTGTTAGAGCGTGTTTATAAACATCTTAACAAATATGATTGTGTTGTTACAACTTTGATATCAGCTGGTATATTTAGTGTGCCTTCTGATGTGTCTTTAACATATCTACTTGGTACTGCCGAGAAACAAGTTGTTCTTGTTAGCAATAATCAAGAGGATTTTGATCTTATTTCTAAGTGTCAGATAACTGCCGTTGAGGGCACTAAGAAATTGGCAGAGCGTCTTTCTTTTAATGTAGGGCGTTCTATCGTTTACGAAACAGATGCTAATAAGTTGATTTTAAGCAATGACGTTGCATTTGTTTCGACATTTAATGTCTTACAGGATGTTTTATCCTTAAGACATGATATAGCACTTGATGATGATGCACGAACCTTTGTTCAGAGCAATGTTGATGTTGTACCTGAGGGTTGGCGTGTTGTCAATAAGTTTTACCAAATTAATGGTGTTAGAACCGTTAAGTATTTTGAGTGTCCCGGTGGCATAGATATATGCAGCCAGGATAAAGTTTTTGGTTATGTACAGCAGGGTAGTTTTAATAAGGCTACTGTTGCTCAAATTAAAGCCTTGTTTTTGGATAAAGTGGACATCTTGCTAACTGTTGATGGTGTCAATTTCACTAACAGGTTTGTGCCTGTAGGTGAAAATTTTGGTAAGAGTCTAGGAAATGTGTTCTGTGATGGAGTTAATGTCACGAAACATAAGTGTGATATAAATTATAAAGGTAAAGTCTTTTTCCAGTTTGATAATCTTTCTAGTGAAGATTTAAAGGCTGTAAGAAGTTCTTTTAATTTTGATCAGAAGGAATTGCTTGCCTACTACAACATGCTTGTTAATTGTTCTAAATGGCAGGTTGTTTTTAATGGTAAGTATTTCACTTTTAAGCAAGCTAATAACAATTGTTTTGTTAATGTTTCTTGCTTAATGCTCCAGAGTTTGAATCTGAAATTTAAAATTGTTCAATGGCAGGAGGCGTGGCTTGAATTTCGTTCTGGTCGCCCTGCTAGATTTGTATCTTTGGTTTTGGCCAAAGGTGGGTTTAAATTTGGTGATCCTGCTGATTCTAGAGATTTCTTGCGTGTTGTGTTTAGTCAAGTTGATTTGACAGGGGCAATATGTGATTTTGAAATTGCATGTAAATGTGGTGTAAAGCAGGAACAGCGTACTGGTGTTGACGCTGTTATGCATTTTGGTACATTGAGTCGTGAAGATCTTGAGATTGGTTACACCGTGGATTGTTCTTGTGGTAAAAAGCTAATCCATTGTGTACGATTTGATGTACCATTTTTAATTTGTAGTAATACACCTGCTAGTGTAAAATTACCTAAGGGTGTAGGAAGTGCAAATATTTTTAAAGGTGATAAGGTTGGTCATTATGTTCATGTTAAGTGTGAACAGTCTTATCAGCTTTATGATGCTTCTAATGTTAAGAAGGTTACAGACGTTACTGGCAATTTGTCAGATTGTTTGTATCTTAAAAATTTGAAACAAACTTTTAAATCGGTGTTAACCACCTATTATTTGGATGATGTTAAGAAAATTGAGTATAAACCTGACTTGTCACAATATTATTGTGACGGAGGTAAGTATTATACTCAGCGTATTATTAAAGCCCAATTTAAAACATTTGAGAAAGTAGATGGTGTGTATACTAATTTTAAATTGATAGGACACACCATCTGTGATATTCTTAATGCTAAGTTGGGTTTTGATAGCTCTAAAGAGTTTGTTGAATATAAAGTTACTGAGTGGCCAACAGCTACAGGTGATGTGGTGTTGGCTACTGATGATTTGTATGTTAAGAGATATGAAAGGGGTTGTATTACTTTTGGTAAACCTGTTATATGGTTAAGCCATGAGCAAGCTTCCCTCAATTCTTTAACATATTTTAATAGACCTTTATTGGTTGATGAGAATAAATTTGATGTTTTAAAAGTGGATGATGTTGACGATGGTGGTGATATCTCAGAGAGTGATGCCAAAGAATCCAAAGAAATCAACATTATTAAGTTAAGTGGTGTTAAAAAACCATTTAAGGTTGAAGATAGTGTCATTGTTAATGATGATACTAGTGAAATCAAATATGTTAAGAGTTTGTCTATAGTTGATGTGTATGATATGTGGCTTACAGGTTGTAGGTATGTTGTTAGAACTGCTAATGATTTGAGCATGGCAGTTAACGTACCTACAATACGTAAGTTTATAAAATTTGGTATGACTCTTGTTAGTATACCAATTGATTTGTTAAATTTAAGAGAGATTAAGCCTGTTTTTAATGTGGTTAAAGCTGTGCGAAATAAAATTTCTGCATGCTTTAATTTTATTAAATGGCTTTTTGTCTTATTATTTGGCTGGATCAAAATATCCGCTGATAATAAAGTAATTTACACCACAGAAGTTGCATCAAAGCTTACATGTAAGCTTGTAGCTTTAGCTTTTAAAAATGCGTTTTTGACATTTAAGTGGAGTGTGGTTGCTAGAGGTGCTTGCATTATAGCGACTATATTTCTATTGTGGTTTAATTTTATATATGCCAATGTAATTTTTAGTGATTTTTATTTGCCTAAAATTGGTTTCTTGCCGACTTTTGTTGGTAAGATCGCACAGTGGATTAAGAGCACTTTTAGTCTTGTAACTATTTGTGATCTATATTCCATTCAGGATGTGGGTTTTAAGAATCAGTATTGTAATGGAAGTATCGCATGTCAATTCTGCTTGGCAGGATTTGATATGTTAGATAATTATAAAGCCATTGATGTAGTACAGTATGAAGCTGATAGGAGAGCATTTGTTGATTATACAGGTGTGTTAAAGATTGTCATTGAATTGATAGTTAGTTACGCCCTGTATACGGCATGGTTTTACCCATTGTTTGCTCTTATTAGTATTCAGATCTTGACCACTTGGCTGCCTGAGCTTTTTATGCTTAGTACATTACATTGGAGTGTTAGGTTGCTGGTGTCTTTAGCTAATATGTTACCAGCACATGTGTTTATGAGGTTTTATATTATTATTGCCTCTTTTATTAAGCTGTTTAGCTTGTTTAGGCATGTTGCCTATGGTTGTAGTAAACCTGGTTGTTTGTTTTGTTACAAGAGGAATCGTAGTCTACGTGTTAAATGTAGTACTATTGTTGGTGGCATGATACGCTATTACGATGTTATGGCTAATGGTGGCACTGGCTTTTGTTCAAAACATCAATGGAATTGCATTGATTGTGATTCTTATAAACCAGGTAATACTTTTATTACTGTTGAGGCCGCTCTTGATTTATCTAAGGAATTGAAACGGCCTATTCAGCCTACAGATGTTGCTTATCATACGGTTACGGATGTTAAGCAAGTTGGTTGTTATATGCGCTTGTTCTATGAGCGTGATGGACAGCGCACATATGATGATGTTAATGCTAGTTTGTTTGTGGATTATAGTAATTTGCTACATTCTAAGGTTAAGGGTGTGCCTAATATGCATGTTGTGGTAGTGGAAAATGATGCCGATAAAGCTAATTTTCTTAATGCTGCTGTATTTTATGCACAGTCTTTGTTTAGACCTATTTTAATGGTTGATAAAAATCTGATAACTACTGCTAATACTGGTACGTCTGTTACAGAAACTATGTTTGATGTTTATGTGGACACATTTTTGTCTATGTTTGATGTGGATAAAAAGAGTCTTAATGCTTTAATAGCAACTGCGCATTCTTCTATAAAACAGGGTACGCAGATTTGTAAAGTTTTGGATACCTTTTTAAGCTGTGCTCGTAAAAGTTGTTCTATTGATTCAGATGTTGATACTAAGTGTTTAGCTGATTCTGTCATGTCTGCTGTATCGGCAGGCCTTGAATTGACGGATGAAAGTTGTAATAACTTGGTGCCAACATATTTGAAGGGTGATAACATTGTGGCAGCTGATTTAGGTGTTCTGATTCAAAATTCTGCTAAGCATGTGCAGGGTAATGTTGCTAAAATAGCCGGTGTTTCCTGTATATGGTCTGTGGATGCTTTTAATCAGCTAAGTTCTGATTTCCAGCATAAATTGAAGAAAGCATGTTGTAAAACTGGTTTGAAATTGAAGCTTACTTATAATAAGCAGATGGCTAATGTCTCTGTTTTAACTACACCCTTTAGTCTTAAAGGGGGTGCAGTTTTTAGTTATTTTGTTTATGTATGTTTTCTGTTGAGTTTGGTTTGTTTTATTGGATTGTGGTGCTTAATGCCCACTTACACAGTACACAAATCAGATTTTCAGCTTCCCGTTTATACCAGTTATAAAGTTTTAGATAATGGTGTTATTAGAGATGTTAGCGTTGAAGATGTTTGTTTCGCTAACAAATTTGAACAATTTGATCAATGGTATGAGTCTACATTTGGTCTAAGTTATTATAGTAACAGTATGGCTTGTCCCATTGTTGTTGCTGTAGTAGACCAGGATCTTGGCTCTACTGTGTTTAATGTCCCTACCAAAGTGTTACGATATGGTTACCATGTGTTGCACTTTATTACACATGCACTTTCTGCTGATGGAGTGCAGTGTTATACGCCACATAGTCAAATATCGTATTCTAATTTTTATGCTAGTGGCTGTGTGCTTTCCTCCGCTTGTACTATGTTTGCAATGGCCGATGGTAGTCCACAACCTTATTGTTATACAGAGGGGCTTATGCAGAATGCTTCTCTGTATAGTTCATTGGTACCTCACGTGCGGTATAATCTTGCTAATGCTAAAGGTTTTATCCGTTTTCCAGAAGTGTTGCGAGAAGGACTTGTGCGTATTGTGCGTACTCGTTCTATGTCGTATTGCAGAGTTGGATTATGTGAGGAAGCTGATGAGGGTATATGCTTTAACTTTAATGGTTCTTGGGTGCTTAATAATGATTATTATAGATCATTGCCTGGGACCTTTTGTGGTAGAGATGTTTTTGACTTAATTTATCAGCTTTTTAAAGGTTTAGCACAGCCTGTGGATTTCTTGGCATTGACTGCTAGTTCTATTGCTGGTGCTATACTTGCTGTAATTGTTGTTTTGGTGTTTTATTACTTAATAAAGCTTAAACGTGCTTTTGGTGATTACACCAGTATTGTTTTTGTCAATGTGATTGTGTGGTGTGTAAATTTTATGATGCTTTTTGTGTTTCAAGTTTACCCTACACTTTCTTGTGTATATGCTATTTGTTATTTTTATGCCACGCTTTATTTCCCTTCGGAGATAAGTGTGATAATGCATTTACAATGGCTAGTTATGTATGGCACTATTATGCCTTTATGGTTTTGTTTGCTATATATATCTGTTGTTGTTTCAAATCATGCTTTTTGGGTATTCGCTTACTGCAGACGGCTTGGTACTTCTGTTCGTAGTGATGGTACATTTGAAGAAATGGCTCTTACTACTTTTATGATTACAAAAGATTCTTATTGTAAGCTTAAGAATTCTTTGTCTGATGTTGCTTTTAATAGATATTTGAGTTTGTATAATAAATATAGGTATTACAGCGGTAAAATGGATACTGCTGCATATAGGGAGGCTGCTTGTTCTCAGTTGGCTAAAGCAATGGATACATTTACCAATAATAATGGTAGTGATGTGCTTTACCAACCACCTACTGCTTCCGTTTCAACTTCATTCTTGCAATCTGGTATTGTGAAAATGGTTAATCCTACTTCTAAGGTAGAACCATGTATTGTCAGTGTTACCTATGGTAATATGACATTGAATGGTTTATGGTTGGATGATAAGGTCTACTGTCCCAGACATGTGATATGTTCTGCTTCAGATATGACTAATCCAGATTATACAAATTTGTTGTGTAGAGTAACATCAAGTGATTTTACTGTATTGTTTGATCGTTTAAGCCTTACAGTGATGTCTTATCAAATGCAGGGTTGTATGCTTGTTCTTACAGTGACCCTGCAAAATTCTCGTACGCCAAAATATACATTTGGTGTGGTTAAACCTGGTGAGACTTTTACTGTTTTAGCTGCTTATAACGGCAAACCACAAGGAGCCTTTCATGTGACTATGCGTAGTAGTTATACCATTAAGGGTTCCTTTTTGTGCGGGTCTTGTGGATCTGTTGGTTATGTGCTAATGGGTGATTGTGTTAAATTTGTGTATATGCATCAATTGGAGCTTAGTACTGGTTGTCATACTGGTACTGATTTCAATGGGGATTTTTATGGTCCTTATAAGGATGCTCAGGTTGTCCAATTGCCCGTTCAGGATTATATACAATCTGTTAATTTTGTAGCATGGCTTTATGCTGCTATACTTAATAATTGTAATTGGTTTGTACAAAGTGATAAGTGTTCTGTTGAAGATTTTAATGTGTGGGCTTTGTCTAATGGGTTTAGCCAAGTTAAGTCTGATCTTGTTATAGATGCTTTAGCTTCTATGACTGGTGTGTCTTTGGAAACACTATTGGCTGCTATTAAGCGTCTCAAGAATGGTTTTCAAGGACGTCAGATTATGGGTAGTTGCTCCTTTGAGGATGAATTGACACCTAGCGATGTTTATCAACAACTCGCTGGTATCAAGTTACAATCAAAGCGTACTAGATTGGTTAAAGGCATTGTTTGTTGGATTATGGCTTCTACATTTTTGTTTAGTTGTATAATTACAGCATTTGTGAAATGGACTATGTTTATGTATGTAACTACTAATATGCTTAGTATTACGTTTTGTGCACTTTGTGTTATAAGTTTGGCCATGTTGTTGGTTAAACATAAGCATCTTTATTTGACTATGTATATAATTCCTGTGCTTTTTACACTGCTGTATAACAACTATTTGGTTGTGTACAAGCAGACATTTAGAGGCTATGTTTATGCATGGCTATCATATTATGTTCCATCAGTTGAGTATACTTATACTGATGAAGTTATTTATGGCATGTTATTGCTTATAGGAATGGTCTTTGTTACATTACGTAGCATTAACCATGATTTGTTCTCTTTTATAATGTTTGTTGGCCGTGTGATTTCTGTTGTCTCTTTGTGGTACATGGGTTCTAACTTAGAGGAAGAAATTCTTCTTATGTTGGCTTCTCTTTTTGGTACTTACACATGGACAACAGCTTTATCTATGGCTGCAGCAAAGGTTATTGCTAAGTGGGTTGCTGTGAATGTTTTGTATTTCACAGATATACCTCAAATTAAGATAGTGCTTGTATGCTATTTGTTTATAGGTTATATTATTAGCTGTTATTGGGGTTTGTTTTCCTTGATGAACAGTTTGTTTAGAATGCCTTTGGGTGTTTATAATTATAAAATTTCAGTACAGGAATTAAGATATATGAATGCTAATGGATTGCGCCCTCCTAAGAATAGTTTTGAAGCCCTTATGCTTAATTTTAAGCTTTTGGGTATTGGAGGTGTGCCAATTATTGAAGTATCTCAATTTCAATCAAAATTGACTGATGTTAAATGTGCTAATGTTGTCTTGCTTAATTGCTTGCAACATTTGCATGTTGCTTCTAACTCTAAGTTGTGGCAGTATTGTAGCACTTTGCACAATGAAATACTTGCCACTTCTGATCTGGGTGTTGCTTTTGAAAAGCTTGCTCAGTTGTTAATTGTTTTGTTTGCTAATCCAGCTGCTGTGGATAGCAAGTGCCTGACTAGTATTGAAGAAGTTTGCGACGATTACGCAAAGGACAATACTGTTTTGCAGGCTTTACAGAGTGAATTTGTTAATATGGCTAGCTTCGTTGAATATGAAGTTGCTAAGAAAAATCTTGATGAGGCGCGTTCTAGTGGTTCTGCTAATCAACAGCAGTTAAAACAGCTAGAGAAAGCCTGTAATATTGCTAAATCTGCTTATGAACGCGACCGTGCTGTAGCAAGAAAGTTGGAGCGTATGGCAGATTTGGCTCTCACTAATATGTATAAAGAAGCTAGAATTAATGATAAGAAGAGTAAGGTTGTTTCTGCCTTGCAAACTATGCTTTTTAGTATGGTGCGTAAGTTAGATAATCAAGCTCTGAATTCAATATTAGATAATGCTGTGAAGGGTTGTGTACCATTGAATGCAATCCCTTCATTGGCTGCAAATACTCTGACTATAATTGTACCAGATAAAAGTGTTTACGATCAGGTAGTTGACAATGTCTATGTTACCTATGCGGGTAATGTATGGCAGATTCAAACTATCCAAGATTCAGATGGTACAAATAAGCAGTTGAATGAGATATCTGATGATTGTAACTGGCCACTAGTTATTATTGCAAATCGGCATAATGAGGTATCTGCAACCGTTTTGCAAAATAATGAATTAATGCCTGCTAAGTTGAAAACTCAGGTCGTTAATAGTGGTCCAGATCAGACTTGTAACACACCTACTCAATGTTACTATAATAATAGTAACAATGGGAAGATTGTTTATGCTATACTTAGTGATGTTGATGGTCTTAAGTATACAAAGATTCTTAAAGATGATGGCAATTTTGTTGTTTTGGAGTTAGATCCTCCTTGTAAATTTACTGTTCAAGATGTTAAAGGTCTTAAAATTAAGTACCTTTATTTTGTAAAAGGTTGTAACACACTAGCAAGAGGCTGGGTTGTTGGTACAATTTCTTCTACAGTTAGATTGCAAGCTGGAACTGCTACTGAGTATGCTTCCAACTCATCTATATTATCTTTATGTGCGTTTTCTGTAGATCCTAAGAAAACGTATTTAGATTTTATACAGCAGGGAGGAACACCTATTGCCAATTGTGTTAAAATGTTGTGTGACCATGCTGGTACCGGTATGGCCATTACTGTTAAACCCGATGCTACCACTAATCAGGATTCATATGGTGGTGCGTCTGTTTGTATATATTGCCGCGCACGAGTTGAACACCCAGATGTTGATGGGTTGTGCAAATTACGCGGCAAGTTTGTACAAGTGCCTGTAGGTATAAAAGATCCTGTGTCTTATGTTTTGACACATGATGTTTGTCAAGTTTGTGGATTTTGGCGGGATGGAAGTTGTTCATGTGTTAGCACTGACACTACTGTTCAGTCAAAAGATACTAATTTTTTAAACCGGGGTACGAGTGTAGATGCCCGTCTCGTACCCTGTGCCAGTGGTTTATCTACTGATGTACAATTAAGGGCATTTGATATTTGCAATGCTAGTGTTGCTGGCATTGGTTTACATTTAAAAGTTAATTGCTGCCGTTTTCAGCGTGTTGATGAGAACGGTGATAAATTAGATCAGTTCTTTGTTGTTAAGAGGACAGATCTGACTATATATAATAGAGAGATGGAATGCTATGAGCGTGTAAAAGATTGTAAGTTTGTGGCTGAACACGATTTCTTTACATTTGATGTAGAAGGTAGTCGTGTGCCACATATTGTACGCAAGGATTTAACAAAGTATACTATGTTGGATCTTTGCTATGCGTTGCGACATTTTGATCGCAATGATTGCATGCTGCTTTGTGACATTCTCTCTATATATGCTGGTTGTGAACAATCCTACTTTACTAAGAAGGATTGGTATGATTTTGTTGAAAATCCTGATATTATTAATGTTTATAAAAAGCTAGGACCTATTTTTAATAGAGCCCTAGTTAGCGCTACTGAGTTTGCAGACAAATTGGTGGAGGTAGGCTTAGTAGGCATTTTAACACTTGATAACCAAGATTTAAATGGTAAATGGTATGATTTTGGTGACTATGTTATTGCAGCCCCAGGTTGTGGTGTTGCTATAGCAGACTCTTATTATTCTTATATGATGCCTATGCTGACCATGTGTCATGCATTGGATTGTGAATTGTATGTGAATAATGCTTATAGACTATTTGATCTTGTACAGTATGATTTTACTGATTACAAGCTCGAATTGTTTAATAAGTATTTTAAGCACTGGAGTATGCCATACCATCCTAACACGGTTGATTGTCAGGATGATCGGTGTATCATACATTGTGCTAATTTTAACATACTTTTTAGTATGGTTTTACCTAATACATGTTTTGGGCCTCTTGTTAGGCAAATTTTTGTGGATGGTGTTCCTTTTGTTGTTTCAATTGGATACCATTATAAAGAACTTGGTATTGTGATGAATATGGATGTGGATACACATCGTTATCGCTTGTCTTTAAAAGACTTGCTTTTATATGCTGCTGATCCAGCTTTGCATGTAGCTTCTGCTAGTGCATTGTATGATTTACGCACTTGCTGTTTTAGTGTTGCGGCTATAACAAGCGGTGTGAAATTTCAAACAGTTAAACCTGGTAATTTTAATCAGGATTTTTATGATTTTATTTTAAGTAAGGGCCTGCTTAAAGAGGGTAGTTCAGTTGATCTGAAGCACTTTTTCTTTACGCAGGATGGTAATGCTGCTATTACTGATTATAATTATTATAAGTATAATTTGCCCACCATGGTGGACATTAAGCAGTTGTTGTTTGTTTTGGAAGTTGTTTATAAGTATTTTGAGATTTATGATGGTGGGTGTATACCGGCATCACAAGTCATTGTTAATAATTATGATAAGAGTGCTGGCTATCCATTTAATAAATTTGGAAAAGCCAGGCTCTATTATGAAGCATTATCATTTGAGGAGCAGGATGAAATTTACGCCTATACTAAGCGCAATGTCCTGCCAACACTTACTCAAATGAATTTGAAATATGCTATTAGTGCTAAGAATAGAGCCCGCACTGTTGCTGGTGTTTCCATACTTAGTACTATGACTGGCAGAATGTTTCATCAAAAGTGTTTGAAAAGTATAGCAGCTACACGTGGTGTTCCTGTTGTTATAGGCACCACTAAATTTTATGGCGGCTGGGATGATATGTTACGTCGCCTTATTAAAGATGTTGATAATCCTGTACTTATGGGTTGGGATTATCCTAAGTGTGATCGTGCTATGCCAAACATACTACGTATTGTTAGTAGTCTGGTTTTGGCTCGAAAACATGAGGCATGTTGTTCGCAAAGCGATAGGTTTTATCGACTTGCGAATGAATGCGCACAAGTTCTGAGTGAAATTGTTATGTGTGGTGGCTGTTATTATGTTAAGCCTGGTGGCACTAGTAGTGGTGATGCAACTACTGCTTTTGCTAATTCAGTTTTTAACATATGTCAAGCTGTTTCAGCCAATGTATGTGCTTTAATGTCATGCAATGGTAATAAGATTGAAGATTTGAGTATACGTGCTCTTCAGAAGCGCTTATACTCACATGTGTATAGAAGTGATATGGTTGATTCAACCTTTGTCACAGAATATTATGAATTTTTAAATAAGCATTTTAGTATGATGATTTTGAGTGATGATGGCGTTGTGTGTTATAATTCTGATTATGCGTCCAAAGGGTATATTGCTAATATAAGTGCCTTTCAACAGGTATTGTATTATCAAAATAACGTTTTTATGTCAGAATCCAAATGTTGGGTTGAAAATGACATAAACAATGGACCTCATGAATTCTGTTCACAACACACAATGCTTGTAAAGATGGATGGGGACGATGTCTATCTTCCATATCCTGATCCTAGTCGTATATTAGGAGCTGGATGTTTTGTAGATGATTTGTTAAAGACTGATAGTGTTCTTTTAATAGAACGATTTGTAAGTCTTGCAATAGATGCTTATCCACTTGTGTACCACGAAAATGAAGAATACCAAAAGGTTTTTCGTGTTTATTTGGAGTATATAAAGAAGTTGTACAATGACCTGGGTAATCAGATCTTGGATAGCTACAGTGTTATTTTAAGTACTTGTGATGGACAAAAGTTTACTGATGAGTCCTTTTACAAGAACATGTATTTAAGAAGTGCAGTTATGCAGAGTGTTGGAGCTTGCGTGGTCTGCTCTTCTCAAACATCATTACGTTGTGGCAGTTGCATCAGAAAGCCTCTTCTTTGCTGCAAGTGTTGTTACGATCATGTTATGGCAACTGATCATAAATATGTTTTGAGTGTTTCACCATATGTGTGTAACGCACCAGGATGTGATGTAAATGATGTTACCAAATTGTATCTAGGTGGTATGTCATATTATTGTGAAGATCATAAGCCACAATATTCGTTTAAGTTGGTAATGAATGGTATGGTTTTTGGTCTATATAAACAATCTTGTACAGGATCTCCGTACATAGATGATTTTAATCGTATAGCTAGTTGTAAATGGACTGATGTTGATGATTACATACTGGCTAATGAATGTACAGAGCGCTTGAAATTGTTTGCTGCAGAAACGCAAAAGGCGACTGAGGAAGCCTTTAAGCAGAGTTATGCATCAGCAACAATACAAGAGATTGTTAGCGAGCGCGAATTGATCCTTTCTTGGGAGATTGGAAAAGTGAAGCCACCACTTAATAAAAATTATGTTTTTACTGGCTACCATTTTACTAAAAATGGCAAGACAGTTTTAGGTGAGTATGTTTTTGATAAGAGTGAGTTGACTAATGGTGTGTATTATCGCGCCACAACCACTTATAAGCTATCTGTAGGAGATGTTTTTGTTTTAACCTCTCATTCAGTAGCTAATTTAAGTGCTCCTACGCTTGTGCCGCAGGAGAATTATAGTAGTATTAGATTTGCTAGTGTTTATAGTGTGCTTGAGACGTTTCAGAACAATGTCGTTAATTATCAACACATTGGTATGAAACGTTATTGTACCGTGCAAGGACCTCCTGGTACAGGAAAGTCACATCTTGCTATTGGTCTTGCTGTTTATTATTGTACAGCACGTGTAGTATACACTGCGGCCAGCCATGCAGCTGTTGACGCATTGTGTGAAAAAGCATACAAATTTTTGAATATAAATGACTGCACTCGTATTGTTCCTGCCAAGGTCAGGGTGGAGTGCTATGATAAGTTTAAAATTAATGACACCACTCGTAAGTATGTGTTTACTACTATAAATGCATTACCTGAGATGGTGACTGATATTGTTGTTGTAGATGAAGTTAGTATGCTTACCAATTATGAGCTTTCTGTTATTAATGCTCGTATTCGTGCTAAGCATTATGTTTACATTGGTGATCCTGCTCAATTGCCAGCACCACGTGTGTTATTGAGCAAGGGTACACTTGAACCTAAATATTTTAACACTGTTACTAAGCTTATGTGTTGCTTAGGGCCAGACATTTTTCTTGGTACATGTTATAGATGTCCTAAGGAAATTGTTGATACAGTGTCTGCCTTGGTTTATGAAAATAAGCTTAAGGCTAAGAATGAAAGTAGTTCATTGTGTTTTAAGGTCTATTATAAAGGCGTTACAACACATGAAAGTTCTAGTGCTGTAAATATGCAGCAGATTTATTTGATTAATAAGTTTTTGAAGGCTAACCCTTTGTGGCATAAAGCCGTTTTTATTAGCCCATATAATAGCCAGAACTTTGCAGCTAAGCGTGTTTTGGGTTTGCAAACCCAGACCGTGGATTCTGCTCAAGGTTCTGAATATGATTATGTTATATATTCACAGACTGCAGAAACAGCGCATTCTGTAAATGTTAATCGCTTCAATGTTGCTATTACTCGAGCCAAGAAAGGTATTCTTTGTGTTATGAGTAATATGCAGTTGTTTGAAGCATTACAGTTTACTACATTGACCTTAGATAAAGTGCCACAGGCCGTTGAAACGAGAGTTCAATGTAGTACCAATTTATTTAAAGATTGTAGCAAGAGTTATAGTGGTTACCACCCAGCTCACGCTCCTTCATTTTTGGCAGTAGATGACAAATATAAGGCAACTGGCGATTTAGCCGTGTGTCTTGGTATTGGAGATTCTGCTGTTACATATTCAAGATTAATATCACTCATGGGTTTTAAACTTGATGTCACCCTTGATGGGTATTGTAAGCTTTTTATAACTAAAGAAGAAGCTGTTAAACGCGTGCGTGCTTGGGTTGGCTTTGATGCTGAAGGCGCTCATGCCACGCGTGATAGCATTGGGACAAATTTCCCACTTCAATTAGGGTTTTCTACAGGAATTGATTTTGTTGTGGAAGCCACTGGTTTGTTTGCTGATAGAGATGGTTACAGCTTTAAAAAGGCTGTGGCTAAAGCTCCTCCTGGTGAACAATTTAAGCATCTCATCCCTTTGATGACTAGAGGTCAGCGCTGGGATGTTGTTAGACCTAGAATAGTACAAATGTTTGCAGATCATTTAATTGATCTGTCTGATTGTGTTGTGCTAGTTACATGGGCAGCCAACTTTGAGCTCACTTGTCTCCGATACTTTGCAAAAGTAGGTCGTGAGATTTCTTGTAATGTGTGCACTAAACGTGCCACAGCTTACAATTCTAGAACTGGTTACTATGGTTGTTGGCGCCATAGTGTTACATGTGATTACTTGTATAATCCACTTATTGTTGATATTCAACAGTGGGGATATATTGGATCTTTATCAAGTAATCATGATTTATATTGTAGTGTCCACAAAGGAGCACATGTTGCTTCATCTGATGCTATAATGACACGGTGTTTGGCCGTTTATGATTGTTTTTGCAATAATATTAATTGGAATGTGGAGTATCCCATTATTTCAAATGAGTTAAGTATTAATACCTCTTGTAGGGTCTTGCAGCGTGTTATGCTTAAAGCTGCAATGCTCTGCAACAGATATACTTTGTGTTATGATATTGGCAACCCAAAAGCGATTGCCTGTGTCAAAGATTTTGATTTTAAGTTCTATGATGCCCAACCAATTGTTAAGTCTGTCAAGACTCTTTTGTATTCTTTTGAGGCACATAAGGACTCTTTTAAAGATGGTTTGTGTATGTTTTGGAACTGTAATGTGGATAAGTATCCACCGAATGCAGTTGTATGTAGATTTGACACGAGAGTGTTGAATAATTTAAATCTTCCTGGCTGTAATGGAGGTAGTTTGTATGTTAATAAACATGCATTCCACACTAAACCCTTTTCTAGGGCAGCCTTTGAGCATTTGAAGCCTATGCCATTTTTCTATTATTCAGATACGCCTTGCGTGTATATGGATGGCATGGATGCTAAGCAGGTTGATTATGTACCTTTGAAATCCGCCACTTGCATCACAAGATGCAATTTAGGTGGTGCAGTTTGTTTAAAACATGCTGAAGAGTATCGTGAGTACCTAGAGTCTTACAATACAGCTACTACAGCAGGTTTTACTTTTTGGGTCTATAAGACATTTGATTTTTATAATTTGTGGAATACGTTCACCAAGCTACAAAGCTTGGAGAACGTTGTATATAATTTAGTCAAAACTGGTCATTATACAGGACAGGCTGGTGAAATGCCTTGTGCCATTATAAATGATAAAGTTGTGGCTAAGATCGATAAGGAGGATGTTGTCATTTTTATTAATAATACAACATACCCTACTAATGTTGCTGTTGAATTATTTGCCAAGCGCAGTATTCGACACCATCCAGAGCTTAAGCTCTTTAGAAATTTGAATATAGACGTGTGTTGGAAGCACGTCATTTGGGATTATGCTAGAGAAAGTATATTTTGCAGTAATACCTATGGTGTCTGCATGTATACAGATTTAAAGTTCATTGATAAATTGAATGTCCTTTTTGATGGTCGTGATAATGGTGCTCTTGAAGCTTTTAAACGCTCTAATAATGGCGTTTACATTTCCACGACAAAAGTTAAGAGTCTTTCGATGATAAAAGGTCCACCGCGTGCTGAATTAAATGGCGTAGTGGTGGACAAGGTTGGAGACACTGATTGTGTGTTTTATTTTGCTGTGCGTAAAGAGGGTCAGGATGTCATCTTCAGCCAATTCGACAGCCTGAGAGTCAGCTCTAACCAGAGCCCACAAGGTAATCTGGGGAGTAATGAACCCGGTAATGTCGGTGGTAATGATGCTCTGGCAACCTCCACTATCTTTACACAAAGCCGTGTTATTAGCTCTTTTACATGTCGTACTGATATGGAAAAAGATTTTATAGCTTTAGATCAAGACTTGTTTATTCAGAAGTATGGTTTGGAGGACTATGCCTTTGAACACATTGTTTATGGTAATTTCAACCAGAAGATTATTGGTGGTTTGCATTTGTTAATAGGCTTGTACCGAAGACAGCAAACTTCCAATCTGGTTATTCAGGAGTTTGTTTCATACGACTCCAGCATACACTCTTATTTTATCACTGATGAGAAGAGTGGTGGTAGTAAGAGTGTTTGCACTGTTATAGATATTTTGTTGGATGATTTTGTGGCTCTTGTTAAGTCACTTAATCTCAACTGTGTGAGTAAGGTTGTTAACGTTAATGTTGATTTTAAAGATTTTCAGTTCATGCTTTGGTGTAACGATGAGAAAGTTATGACTTTCTATCCTCGTTTGCAAGCTGCATCTGACTGGAAGCCTGGTTATTCTATGCCTGTATTATACAAGTATTTGAATTCCCCAATGGAAAGAGTTAGTCTCTGGAATTATGGGAAGCCGGTTACTTTGCCTACAGGCTGTATGATGAATGTTGCTAAGTATACTCAGTTATGTCAATATCTGAATACTACAACATTAGCTGTACCTGTTAATATGCGAGTTTTGCATTTAGGTGCAGGTTCAGAAAAAGGAGTAGCACCGGGTTCTGCAGTTCTTAGGCAGTGGTTGCCTGCTGGTACTATTCTTGTAGATAATGATTTATACCCATTTGTGAGTGACAGTGTCGCTACATATTTTGGGGATTGTATAACCTTACCCTTTGATTGTCAATGGGATTTGATAATTTCTGATATGTATGACCCTATTACTAAGAACATAGGGGAGTACAATGTAAGTAAAGATGGTTTCTTTACATACATTTGTCATATGATTCGCGACAAGTTAGCTCTGGGTGGCAGTGTTGCTATAAAAATAACAGAGTTTTCTTGGAATGCAGAATTATATAAGTTAATGGGGTATTTTGCATTTTGGACGGTTTTCTGCACAAATGCAAACGCTTCTTCTAGTGAAGGGTTTTTAATTGGCATAAATTATTTGGGTAAGCCCAAGGTTGAGATAGATGGAAATGTTATGCATGCCAATTATTTGTTTTGGAGAAATTCCACAGTTTGGAACGGGGGTGCTTATAGCCTGTTTGACATGGCTAAATTCCCGCTTAAGTTGGCTGGTACTGCCGTAATAAATTTAAGAGCAGACCAGATTAATGATATGGTTTATTCCCTTCTTGAAAAGGGTAAACTACTTGTTAGAGATACAAATAAAGAAGTTTTTGTTGGTGACAGTTTGGTTAATGTAATCATGGCAGTCGCTTATGCAGACAAGCCTAATCACTTTATCAATTTTCCACTTACCCAGTTTCAGGGCTTTGTGTTAAATTATAAAGGTTTACAATTTCAACTTCTCGATGAAGGAGTGGATTGTAAAATACAAACAGCGCCTCACATTAGTCTTGCTATGCTGGATATTCAGCCTGAAGACTACAGAAGTGTTGATGTTGCTATTCAAGAAGTTATTGATGATATGCATTGGGGTGAGGGCTTTCAGATTAAATTTGAAAACCCCCATATCCTAGGAAGATGCATAGTTTTAGATGTTAAAGGTGTAGAAGAATTGCATGATGATTTAGTTAATTACATTCGTGATAAGGGTTGTGTTGATGACCAATCCAGGAAGTGGATTGGACATTGCACCATAGCCCAACTCACTGATGCTGCACTTTCCATTAAGGGAAATGTTGATTTTATAAACAGCATGCAATTCAACTATAAAATCACTATCAATCCCTCATCACCGGCTAGACTTGAAATAGTTAAGCTTGGTGCTGAAAAGAAAGATGGTTTTTATGAAACCATAGCTAGCCACTGGATGGGAATTCGTTTTGAATATAATCCACCCACTGATAAGCTAGCTATGATTATGGGTTATTGTTGTTTAGAAGTGGTGCGTAAAGAGCTAGAAGAAGGTGACCTTCCCGAGAATGATGATGATGCTTGGTTTAAGCTATCGTACCATTATGAAAACAATTCTTGGTTCTTTCGACATGTCTACAGGAAAAGTTCTTATTTCCGTAAGTCTTGTCAAAATTTAGATTGTAATTGTTTGGGGTTTTATGAATCTTCAGTTGAAGAAGACATGTTTTTGATACTTTTAATTTCCTTACCAACGGCTTTTGCTGTTATAGGAGATTTAAAGTGTACTACAGTTTCCATTAATGATGTTGACACTGGTGTTCCTTCTATTAGCACTGATACTGTCGATGTTACTAAAGGTTTAGGTACTTATTATGTTTTAGATCGTGTGTATTTAAATACTACGTTGTTGCTTAATGGTTATTACCCTACTTCAGGTTCTACATATCGTAATATGGCACTGAAGGGAACTTTACTATTGAGCACACTGTGGTTTAAACCACCTTTTCTTTCTGATTTTACTAATGGTATTTTTGCTAAGGTCAAAAATACCAAGGTTATTAAAGATGGTGTAATGTATAGTGAGTTTCCTGCTATAACTATAGGTAGTACTTTTGTAAATACATCCTATAGTGTGGTAGTACAACCACATACTACCATTTTGGGTAATAAATTACAAGGTTTCTTAGAGATCTCTGTTTGCCAGTATACTATGTGCGAGTACCCAAATACGATTTGTAATCCTAATCTGGGTAATCGACGCGTAGAACTATGGCATTGGGATACAGGTGTTGTTTCCTGTTTATATAAGCGTAATTTCACATATGATGTGAATGCTGATTATTTGTATTTCCATTTTTATCAAGAAGGTGGTACTTTTTATGCATATTTTACAGACACTGGTGTCGTTACTAAGTTTCTGTTTAATGTTTATTTAGGCACGGTGCTCTCACATTATTATGTCATGCCTTTGACTTGTAATAGTGCTCTGACTTTAGAATATTGGGTTACACCCCTCACTTCTAAACAATATCTACTAGCTTTCAATCAAGATGGTGTTATTTTTAATGCTGTTGATTGTAAGAGTGATTTTATGAGTGAGATTAAGTGTAAAACACTATCTATAGCACCATCTACTGGTGTTTATGAATTAAACGGTTACACTGTTCAGCCAATTGCAGATGTTTACCGACGTATACCTAATCTTCCCGATTGCAATATTGAGGCTTGGCTTAATGATAAGTCGGTGCCCTCTCCATTAAATTGGGAACGTAAGACTTTTTCAAATTGTAATTTTAATATGAGCAGCCTGATGTCTTTTATTCAGGCAGACTCATTTACTTGTAATAATATTGATGCTGCTAAGATATATGGTATGTGTTTTTCCAGCATAACTATAGATAAGTTTGCAATACCCAATGGTAGGAAGGTTGACCTACAATTGGGTAATTTGGGTTATTTGCAGTCTTTTAACTATAGAATTGATACTACTGCTACAAGTTGTCAGTTGTATTATAATTTACCTGCTGCTAATGTTTCTGTTAGCAGGTTTAATCCTTCTACTTGGAATAGGAGATTTGGTTTTACAGAACAATCTGTTTTTAAGCCTCAACCTGCAGGTGTTTTTACTGATCATGATGTTGTTTATGCACAACATTGTTTTAAAGCTCCCACAAATTTCTGTCCGTGTAAATTGGATGGGTCTTTGTGTGTAGGTAATGGTCCTGGTATAGATGCTGGTTATAAAACTAGTGGCATAGGCACTTGTCCTGCAGGTACTAATTATTTAACTTGCCATAATGCTGCCCAATGTGATTGTTTGTGCACTCCAGACCCCATTACATCTAAAGCTACAGGGCCTTACAAGTGCCCCCAAACTAAATATTTAGTTGGCATAGGTGAGCACTGTTCGGGTCTTGCTATTAAAAGTGATCATTGTGGAGGTAACCCTTGTACTTGCCAACCACAAGCATTTTTGGGGTGGTCTGTTGACTCTTGTTTACAAGGGGATAGGTGTAATATTTTTGCTAATTTCATTTTGCATGATGTTAATAGTGGTACTACTTGTTCTACTGATTTACAAAAATCAAACACAGACATAATTCTTGGTGTTTGTGTTAATTATGATCTTTATGGTATTACTGGCCAAGGTATCTTTGTTGAGGTTAATGCGACTTATTATAATAGTTGGCAGAACCTTTTATATGATTCTAATGGTAATCTCTATGGTTTTAGAGACTACTTAACAAATAGAACTTTTATGATTCGTAGTTGCTATAGTGGTCGTGTTTCAGCGGCCTTTCATGCTAACTCTTCCGAACCAGCATTGCTATTTCGGAATATTAAATGCAATTACGTTTTTAATAATACTCTTTCACGACAGCTGCAACCTATTAACTATTTTGATAGCTATCTTGGTTGTGTTGTCAATGCTGATAATAGTACTTCTAGTGTTGTTCAAACATGTGATCTCACAGTAGGTAGTGGTTACTGTGTGGATTACTCTACAAAAAGACGAAGTCGTAGATCGATTACCACTGGTTATCGGTTTACTAATTTTGAGCCATTTACTGTTAATTCAGTAAATGATAGCTTAGAACCTGTAGGTGGTTTGTACGAAATTCAAATACCTTCAGAGTTTACTATAGGTAATATGGAGGAGTTTATTCAAACAAGCTCTCCTAAAGTTACTATTGATTGTTCTGCTTTTGTCTGTGGTGATTATGCAGCATGTAAATCACAGTTGGTTGAATATGGTAGCTTCTGTGACAATATTAATGCTATACTCACAGAAGTAAATGAACTACTTGACACTACACAGTTGCAAGTAGCTAATAGTTTAATGAATGGTGTCACTCTTAGCACTAAGCTTAAAGATGGCGTTAATTTCAATGTAGACGACATCAATTTTTCCCCTGTATTAGGTTGTTTAGGAAGCGATTGTAATAAAGTTTCCAGTAGATCTGCTATAGAGGACTTACTTTTTTCTAAAGTAAAGTTATCTGATGTCGGTTTCGTTGAGGCTTATAATAATTGTACTGGAGGTGCCGAAATTAGGGACCTCATTTGTGTGCAAAGTTATAATGGTATCAAGGTGTTGCCTCCACTGCTCTCAGAAAATCAGATCAGTGGATACACTTTGGCTGCCACCTCTGCTAGCCTGTTTCCTCCATGGTCAGCAGCAGCAGGTGTACCATTCTATTTAAATGTTCAGTATCGTATTAATGGTATTGGTGTTACCATGGATGTGCTAAGTCAAAATCAAAAGCTTATTGCTAATGCATTTAACAATGCTCTTGGTGCTATTCAGGAAGGGTTTGATGCTACCAATTCTGCTTTAGTTAAAATTCAAGCTGTTGTTAATGCAAATGCTGAAACTCTTAATAACTTATTGCAACAACTCTCTAATAGATTTGGTGCTATAAGTTCTTCTTTACAAGAAATTCTATCTAGACTGGATGCTCTTGAAGCGCAAGCTCAGATAGACAGACTTATTAATGGGCGTCTTACCGCTCTTAATGCTTATGTTTCTCAACAGCTTAGTGACTCTACACTAGTAAAGTTTAGTGCAGCACAAGCTATGGAGAAGGTTAATGAATGTGTCAAAAGCCAATCATCTAGGATAAATTTTTGTGGTAATGGTAATCATATTATATCATTAGTGCAGAATGCTCCATATGGTTTGTATTTTATCCACTTTAGCTATGTCCCTACTAAGTATGTCACTGCGAAGGTTAGTCCCGGTCTGTGCATTGCTGGTGGTAGAGGTATAGCCCCTAAGAGTGGTTATTTTGTTAATGTAAATAACACTTGGATGTTCACTGGTAGTGGTTATTACTACCCTGAACCTATAACTGGAAATAATGTTGTTGTTATGAGTACCTGTGCTGTTAATTATACTAAAGCGCCGGATGTAATGCTGAACATTTCAACACCCAACCTCCCTGATTTTAAGGAAGAGTTGGATCAATGGTTTAAAAACCAAACTTCAGTGGCACCAGATTTGTCACTTGATTATATAAATGTTACATTCTTGGACCTACAAGATGAAATGAATAGGTTACAGGAGGCAATAAAAGTTTTAAATCAGAGCTACATCAATCTCAAGGACATTGGTACATATGAGTATTATGTAAAATGGCCTTGGTATGTATGGCTTTTAATTGGCTTTGCTGGTGTAGCTATGCTTGTTTTACTATTCTTCATATGCTGTTGTACAGGATGTGGGACTAGTTGTTTTAAGAAATGTGGTGGTTGTTGTGATGATTATACTGGACACCAGGAGTTAGTAATTAAAACATCACATGAAGATATGTTTTTGCTTCCTAGATTTGTTCTAGTTAGCTGCATAATTGGTAGCCTAGGTTTTGACAACCCTCCTACCAATGTTGTTTCGCATTTAAATGGAGATTGGTTTTTATTTGGTGACAGTCGTTCAGATTGTAATCATGTTGTTACTACCAACCCCCGTAATTATTCTTATATGGACCTTAATCCTGCCTTGTGTGGTTCTGGTAAAATATCAGCTAAAGCTGGCAACTCCATTTTTAGGAGTTTTCACTTTACTGATTTTTATAATTACACAGGCGAAGGTCAACAAATTATTTTCTATGAGGGTGTTAATTTTACGCCTTATCATGCCTTTAAATGCATCACTTCTGGTAGTAATGATATTTGGATGCAGAATAAAGGCTTGTTTTACACTCAGGTTTATAAGAATATGGCTGTGTATCGCAGCCTTACTTTTGTTAATGTACCATATGTTTATAATGGCTCTGCACAATCTACAGCCCTTTGTAAATCTGGTAGTTTAGTTCTTAATAACCCTGCATATATAGCTCGTGAAGCTAATTTTGGGGATTATTATTATAAGGTTGAAGCTGATTTTTATTTGTCAGGTTGTGACGAGTATATCGTACCACTTTGTATTTTCAACGGCAAGTTTTTGTCGAATACAAAGTATTATGATGATAGTCAATATTATTTTAATAAAGACACTGGTGTTATTTATGGTCTCAATTCTACTGAAACCATTACCACTGGTTTTGACTTTAATTGTCATTATTTAGTTCTACCCTCTGGTAATTATTTAGCCATTTCAAATGAGCTATTGTTAACTGTTCCTACTAAAGCAATCTGTCTTAATAAGCGTAAGGATTTTACGCCTGTACAGGTTGTTGATTCGCGGTGGAACAATGCCAGGCAGTCTGATAACATGACGGCAGTTGCTTGTCAACCCCCGTACTGTTATTTTCGTAATTCTACTACCAATTATGTTGGTGTTTATGATATCAATCATGGGGATGCTGGTTTTACTAGCATACTCAGTGGTTTGTTATATGACTCACCTTGTTTTTCGCAGCAAGGTGTTTTTAGGTATGATAATGTTAGCAGTGTCTGGCCTCTCTACCCTTATGGCAGATGCCCTACTGCTGCTGATATTAATACCCCTGATGTACCTATTTGTGTGTATGATCCGCTACCAATTATTTTGCTTGGCATTCTTTTGGGTGTTGCGGTCATAATTATTGTAGTTTTGTTGTTATATTTTATGGTGGATAATGGTACTAGGCTGCATGATGCTATGTTCATGGCTGATGCTTATTTTGCAGACACTGTGTGGTATGTGGGGCAAATAATTTTTATAGTTGCCATTTGTTTATTGGTTATAATAGTTGTAGTGGCATTTTTGGCAACTTTTAAATTGTGTATTCAACTTTGCGGTATGTGTAATACCTTAGTACTGTCCCCTTCTATTTATGTGTTTAATAGAGGTAGGCAGTTTTATGAGTTTTACAATGATGTAAAACCACCAGTTCTTGATGTGGATGACGTTATGAGTAGTGTAACTACACCAGCACCTGTTTACACCTGGACTGCTGATGAAGCTATTAAATTCCTAAAGGAATGGAACTTTTCTTTGGGTATTATACTACTTTTTATTACAGTCATATTGCAATTTGGATATACAAGTCGCAGTATGTTTGTTTATGTTATTAAGATGATCATTTTGTGGCTTATGTGGCCCCTTACTATCATCTTAACTATTTTCAATTGCGTGTATGCGTTGAATAATGTGTATCTTGGCTTCTCTATAGTTTTTACTATAGTGGCCATTATCATGTGGATTGTGTATTTTGTGAATAGTATCAGGTTGTTTATTAGAACTGGAAGTTGGTGGAGTTTCAACCCAGAAACAAACAACTTGATGTGTATAGATATGAAAGGAAGGATGTATGTTAGGCCGATAATTGAGGACTACCATACCCTTACGGTCACAATAATACGTGGTCATCTTTACATGCAAGGTATAAAACTAGGTACTGGCTATTCTTTGTCAGATTTGCCAGCTTATGTGACTGTTGCTAAGGTCTCGCACCTGCTCACGTATAAGCGTGGTTTTCTTGACAAGATAGGCGATACTAGTGGTTTTGCTGTTTATGTTAAGTCCAAAGTCGGTAATTACCGACTGCCATCAACCCAAAAGGGTTCTGGCTTGGACACCGCATTGTTGAGAAATAATATCATGTCTTTTACTCCTGGTAAGCAATCCAGTAGTAGAGCGTCCTCTGGAAATCGTTCTGGTAATGGCATCCTTAAGTGGGCCGATCAGTCCGATCAATCTAGAAATGTTCAAACCAGGGGTAGAAGAGCTCAATCCAAGCAAACTGCTACTTCTCAGCAACCATCAGGAGGGAATGTTGTACCCTACTATTCTTGGTTCTCTGGAATTACTCAGTTTCAAAAGGGAAAGGAGTTTGAATTTGCAGAGGGACAAGGTGTGCCTATTGCACCAGGAGTCCCAGCTACTGAAGCTAAGGGGTACTGGTACAGACACAACAGACGTTCCTTTAAAACAGCCGATGGCAACCAGCGTCAATTGCTGCCACGATGGTATTTTTACTATCTTGGAACAGGACCGCATGCCAAAGACCAGTATGGCACCGACATTGACGGAGTCTACTGGGTCGCTAGTAACCAGGCTGATGTCAATACCCCGGCTGACATTCTCGATCGGGACCCAAGTAGCGATGAGGCTATTCCGACTAGGTTTCCGCCTGGCACGGTACTCCCTCAGGGTTACTATATTGAAGGCTCAGGAAGGTCTGCTCCTAATTCCAGATCTACTTCACGCGCATCCAGTAGAGCCTCTAGTGCAGGATCGCGCAGTAGAGCCAATTCTGGCAATAGAACCCCTACCTCTGGTGTAACACCTGATATGGCTGATCAAATTGCTAGTCTTGTTCTGGCAAAACTTGGCAAGGATGCCGCTAAGCCACAGCAAGTAACTAAGCAGACTGCCAAAGAAATCAGACAGAAAATTTTGAATAAGCCCCGCCAGAAGAGGAGCCCCAATAAACAATGCACTGTTCAGCAGTGTTTTGGGAAGAGAGGCCCCAATCAGAATTTTGGTGGTGGAGAAATGTTAAAACTTGGAACTAGTGATCCACAGTTCCCCATTCTTGCAGAACTCGCACCCACAGCTGGTGCGTTTTTCTTTGGATCAAGATTAGAGTTGGCCAAAGTGCAGAATTTGTCTGGGAATCTTGACGAACCCCAGAAGGATGTTTATGAATTGCGCTATAATGGCGCAATTAGATTTGATAGTACACTTTCAGGTTTTGAGACCATAATGAAGGTGTTGAATGAGAATTTGAATGCATACCAACAACAGGATGGTACGATGAATATGAGTCCAAAACCACAGCGTCAGCGTGGTCAGAAGAACGGACAAGGAGAAAATGATAATATAAGTGTTGCAGCGCCCAAAAGCCGTGTGCAGCAAAATAAGATTAGAGAGTTGACTGCAGAGGACATCAGCCTTCTTAAGAAGATGGATGAGCCCTTTACTGAAGACACCTCAGAAATA
>gi|15077808|gb|AF391541.1|_Bovine_coronavirus_isolate_BCoV-ENT_complete_genome
ATGTCGAAGATCAACAAATACGGTCTCGAACTACACTGGGCTCCAGAATTTCCATGGATGTTTGAGGACGCAGAGGAGAAGTTGGACAACCCTAGTAGTTCAGAGGTGGATATAGTATGCTCCACCACTGCGCAAAAGCTGGAAACAGGCGGAATTTGTCCTGAAAATCATGTGATGGTGGATTGTCGCCGACTTCTTAAACAAGAATGTTGTGTGCAGTCTAGCCTAATACGTGAAATTGTTATGAATACACGTCCATATGATTTGGAGGTGCTACTTCAAGATGCTTTGCAGTCCCGCGAAGCAGTTTTGGTTACACCCCCTCTAGGTATGTCTCTGGAGGCATGCTATGTGAGAGGTTGTAATCCTAATGGATGGACCATGGGTTTGTTTCGGCGTAGAAGTGTGTGTAACACTGGTCGCTGCGCTGTTAACAAGCATGTGGCCTATCAGCTATATATGATTGACCCTGCGGGTGTCTGTTTTGGTGCAGGTCAATTTGTGGGTTGGGTTATACCCTTAGCCTTTATGCCTGTGCAATCCCGGAAATTTATTGTTCCTTGGGTTATGTACTTGCGTAAGTGTGGCGAAAAGGGTGCCTACAACAAAGATCATAAACGTGGCGGTTTTGAACACGTTTATAATTTTAAAGTTGAGGATGCTTACGACTTGGTTCATGATGAGCCTAAGGGTAAGTTTTCTAAGAAGGCTTATGCTTTAATTAGAGGATACCGTGGTGTTAAACCGCTTCTTTATGTAGACCAGTATGGTTGTGATTATACTGGTGGTCTTGCAGATGGCTTAGAGGCTTATGCTGATAAGACATTGCAAGAAATGAAGGCATTATTTCCTATTTGGAGCCAGGAACTCCCTTTTGATGTAACTGTGGCATGGCACGTTGTGCGTGATCCACGTTATGTTATGAGACTGCAAAGTGCTTCTACTATACGTAGTGTTGCATATGTTGCTAACCCTACTGAAGACTTGTGTGATGGTTCTGTTGTTATAAAGGAACCTGTGCATGTTTATGCGGATGACTCTATTATTTTACGTCAACATAATTTAGTTGACATTATGAGTTGTTTTTATATGGAGGCAGATGCAGTTGTAAATGCTTTTTATGGTGTTGATTTGAAAGATTGTGGTTTTGTTATGCAGTTTGGTTATATTGACTGCGAACAAGACTTGTGTGATTTTAAAGGTTGGGTTCCTGGTAATATGATAGATGGTTTTGCTTGCACTACTTGTGGTCATGTCTATGAGACAGGTGATTTGCTAGCACAATCTTCAGGTGTTCTGCCTGTTAATCCTGTATTGCATACTAAGAGTGCAGCAGGTTATGGTGGTTTTGGTTGTAAGGATTCTTTTACCCTGTATGGCCAAACTGTAGTTTATTTTGGAGGTTGTGTGTATTGGAGTCCAGCACGTAATATATGGATTCCTATATTAAAATCTTCTGTTAAGTCTTATGACGGTTTGGTTTATACTGGAGTTGTAGGTTGCAAGGCTATTGTAAAGGAAACAAATCTCATTTGCAAAGCGTTGTACCTTGATTATGTTCAACACAAGTGTGGCAATTTACACCAGCGGGAGTTGCTAGGTGTGTCAGATGTGTGGCATAAACAATTGTTATTAAATAGAGGTGTGTACAAACCTCTTTTAGAGAATATTGATTATTTTAATATGCGGCGCGCTAAATTTAGTTTAGAAACTTTTACTGTTTGTGCAGATGGTTTTATGCCTTTTCTTTTAGATGATTTGGTTCCGCGCGCATATTATTTGGCAGTAAGTGGTCAAGCATTTTGTGACTACGCAGATAAAATCTGCCATGCTGTTGTGTCTAAGAGTAAAGAGTTACTTGATGTGTCTCTGGATTCTTTAAGTGCAGCTATACATTATTTGAATTCTAAAATTGTTGATTTGGCTCAACATTTTAGTGATTTTGGAACAAGTTTTGTTTCTAAAATTGTTCATTTCTTTAAGACTTTTACTACTAGCACTGCTCTTGCATTTGCATGGGTTTTATTTCATGTTTTGCATGGTGCTTATATAGTAGTAGAGAGTGATATATATTTTGTTAAAAACATTCCTCGTTATGCTAGTGCTGTTGCACAAGCATTTCGGAGTGTTGCTAAAGTTGTACTGGACTCTTTAAGAGTTACTTTTATTGATGGCCTTTCTTGTTTTAAGATTGGACGTAGAAGAATTTGTCTCTCAGGCAGTAAAATTTATGAAGTTGAGCGTGGCTTGTTACATTCATCTCAATTGCCATTAGATGTTTATGATTTAACCATGCCTAGTCAAGTTCAGAAAGCCAAGCAAAAACCTATTTATTTAAAAGGTTCTGGTTCTGATTTTTCATTAGCAGATAGTGTGGTTGAAGTTGTTACAACTTCACTTACACCATGTGGTTATTCTGAACCACCTAAAGTTGCAGATAAAATTTGCATTGTGGATAATGTTTATATGGCCAAGGCTGGTGACAAATATTACCCTGTTGTGGTTGATGGTCATGTAGGACTCTTGGATCAAGCATGGAGGGTTCCTTGTGCTGGAAGGCGTGTTACATTTAAGGAACAGCCTACAGTAAATGAGATTGCAAGCACACCTAAGACTATTAAAGTTTTTTATGAGCTTGACAAAGATTTTAATACTATTTTAAACACTGCATGTGGAGTGTTTGAAGTAGATGATACCGTGGATATGGAGGAATTTTATGCTGTGGTGATTGATGCCATAGAAGAGAAACTTTCTCCATGTAAGGAGCTTGAAGGTGTAGGTGCTAAAGTTAGTGCCTTTTTACAGAAATTAGAGGATAATTCCCTATTTTTATTTGATGAGGCTGGCGAGGAAGTTCTTGCTTCTAAATTGTATTGTGCTTTTACAGCTCCTGAAGATGATGACTTTCTTGAAGAAAGTGGTGTTGAAGAAGATGATGTAGAAGGTGAGGAAACTGATTTAACTGTCACAAGTGCTGGAGAGCCTTGTGTTGCCAGTGAACAGGAGGAGTCTTCTGAAATCTTAGAGGACACTTTGGATGATGGTCCATGTGTGGAGACATCTGATTCACAAGTTGAAGAAGATGTAGAAATGTCGGATTTTGCTGATCTTGAATCTGTGATTCAGGATTATGAAAATGTTTGTTTTGAGTTTTATACTACAGAGCCAGAATTTGTTAAAGTTTTGGATCTGTATGTGCCTAAAGCAACTCGCAACAATTGCTGGTTGCGATCAGTTTTGGCAGTGATGCAGAAACTGCCCTGTCAATTTAAAGATAAAAATTTGCAGGATCTTTGGGTGTTATATAAGCAACAGTATAGTCAGTTGTTTGTTGATACCTTGGTTAATAAGATACCTGCTAATATTGTAGTTCCACAAGGTGGTTATGTTGCCGATTTTGCATATTGGTTCTTAACCTTATGTGATTGGCAGTGTGTTGCATACTGGAAATGCATTAAATGTGATTTAGCTCTTAAGCTTAAAGGCTTGGATGCTATGTTCTTTTATGGTGATGTTGTCTCACATGTGTGCAAGTGTGGTGAGTCTATGGTACTTATTGATGTTGATGTGCCATTTACAGCCCACTTTGCTCTTAAAGATAAGTTGTTTTGTGCATTTATTACTAAGCGTAGTGTGTATAAAGCAGCTTGTGTTGTGGATGTTAATGATAGTCATTCTATGGCTGTTGTTGATGGTAAACAAATTGATGATCATCGTGTCACTAGTATTACTAGTGATAAGTTTGATTTTATTATTGGGCATGGTATGTCATTTTCAATGACTACTTTCGAAATTGCCCAATTGTATGGTTCTTGTATAACACCTAATGTATGTTTTGTTAAAGGTGATATAATTAAAGTTTCTAAGCGTGTTAAAGCAGAAGTCGTTGTAAATCCTGCTAATGGCCATATGGCACATGGTGGTGGTGTTGCAAAGGCTATTGCAGTAGCAGCTGGACAGCAGTTTGTTAAAGAGACTACCGATATGGTTAAGTCTAAAGGAGTTTGTGCTACTGGAGACTGTTATGTCTCTACAGGGGGTAAATTATGTAAAACTGTGCTTAATGTTGTTGGACCTGATGCGAGAACACAGGGTAAACAAAGTTATGCATTGTTAGAGCGTGTTTATAAACATCTTAACAAATATGATTGTGTTGTTACAACTTTGATATCAGCTGGTATATTTAGTGTGCCGTCTGATGTGTCTTTAACATATCTACTTGGTACTGCCGAGAAACAAGTTGTTCTTGTTAGCAATAATCAAGAGGATTTTGATCTTATTTCTAAGTGTCAGATAACTGCCGTTGAGGGCACTAAGAAATTGGCAGAGCGTCTTTCTTTTAATGTAGGGCGTTCTATCGTTTACGAAACAGATGCTAATAAGTTGATTTTAAGCAATGACGTTGCATTTGTTTCGACATTTAATGTCTTACAGGATGTTTTATCCTTAAGACATGATATAGCACTTGATGATGATGCACGAACCTTTGTTCAGAGCAATGTTGATGTTGTACCTGAGGGTTGGCGTGTTGTCAATAAGTTTTATCAAATTAATGGTGTTAGAACCGTTAAGTATTTTGAGTGTCCCGGTGGCATAGATATATGCAGCCAGGATAAAGTTTTTGGTTATGTACAGCAGGGTAGTTTTAATAAGGCTACTGTTGCTCAAATTAAAGCCTTGTTTTTGGATAAAGTGGACATCTTGCTAACTGTTGATGGTGTCAATTTCACTAACAGGTTTGTGCCTGTAGGTGAAAGTTTTGGTAAGAGTCTAGGAAATGTGTTCTGTGATGGAGTTAATGTCACGAAACATAAGTGTGATATAAATTATAAAGGTAAAGTCTTTTTCCAGTTTGATAATCTTTCTAGTGAAGATTTAAAGGCTGTAAGAAGTTCTTTTAATTTTGATCAGAAGGAATTGCTTGCCTACTACAACATGCTTGTTAATTGTTCTAAATGGCAGGTTGTTTTTAATGGTAAGTATTTCACTTTTAAGCAAGCTAATAACAATTGTTTTGTTAATGTTTCTTGCTTAATGCTCCAGAGTTTGAATCTGAAATTTAAAATTGTTCAATGGCAGGAGGCGTGGCTTGAATTTCGTTCTGGCCGCCCTGCTAGATTTGTATCTTTGGTTTTAGCCAAAGGTGGGTTTAAATTTGGTGATCCTGCTGACTCTAGAGATTTCTTGCGTGTTGTGTTTAGTCAAGTTGATTTGACAGGGGCAATATGTGATTTTGAAATTGCATGTAAATGTGGTGTAAAGCAGGAACAGCGTACTGGTGTGGACGCTGTTATGCATTTTGGTACATTGAGTCGTGAAGATCTTGAGATTGGTTACACCGTGGATTGTTCTTGCGGTAAAAAGCTAATCCATTGTGTACGATTTGATGTACCATTTTTAATTTGTAGTAATACACCTGCTAGTGTAAAATTACCTAAGGGTGTAGGAAGTGCAAATATTTTTAAAGGTGATAAGGTTGGTCATTATGTTCATGTTAAGTGTGAACAGTCTTATCAGCTTTATGATGCTTCTAATGTTAAGAAGGTTACAGACGTTACTGGCAATTTGTCAGATTGTTTGTATCTTAAAAATTTGAAACAAACTTTTAAATCGGTGTTAACCACCTATTATTTGGATGATGTTAAGAAAATTGAGTATAACCCTGACTTGTCACAATATTATTGTGACGGAGGTAAGTATTATACTCAGCGTATTATTAAAGCCCAATTTAAAACATTTGAGAAAGTAGATGGTGTGTATACTAATTTTAAATTGATAGGACACACCATCTGTGATATTCTTAATGCTAAGTTGGGTTTTGATAGCTCTAAAGAGTTTGTTGAATATAAAGTTACTGAGTGGCCAACAGCTACAGGTGATGTGGTGTTGGCTACTGATGATTTGTATGTTAAGAGATACGAAAGGGGTTGTATTACTTTTGGTAAACCTGTTATATGGTTAAGCCATGAGCAAGCTTCCCTCAATTCTTTAACATATTTTAATAGACCTTTATTGGTTGATGAGAATAAATTTGATGTTTTAAAAGTGGATGATGTTGACGATGGTGGTGATATCTCAGAGAGTGATGCCAAAGAATCCAAAGAAATCAACATTATTAAGTTAAGTGGTGTTAAAAAACCATTTAAGGTTGAAGATAGTGTCATAGTTAATGATGATACTAGTGAAATCAAATATGTTAAGAGTTTGTCTATAGTTGATGTGTATGATATGTGGCTTACAGGTTGTAGGTATGTTGTTAGAACTGCTAATGCTTTGAGCATGGCAGTTAACGTACCTACAATACGTAAGTTTATAAAATTTGGTATGACTCTTGTTAGTATACCAATTGATTTGTTAAATTTAAGAGAGATTAAGCCTGTTTTTAATGTGGTTAAAGCTGTGCGAAATAAAATTTCTGCATGCTTTAATTTTATTAAATGGCTTTTTGTCTTATTATTTGGCTGGATTAAAATATCCGCTGATAATAAAGTAATTTACACCACAGAAGTTGCATCAAAGCTTACATGTAAGCTTGTAGCTTTAGCTTTTAAAAATGCGTTTTTGACATTTAAGTGGAGTGTGGTTGCTAGAGGTGCTTGCATTATAGCGACTATATTTCTATTGTGGTTTAATTTTATATATGCCAATGTAATTTTTAGTGATTTTTATTTGCCTAAAATTGGTTTCTTGCCGACTTTTGTTGGTAAGATCGCACAGTGGATTAAGAGCACTTTTAGTCTTGTAACTATTTGTGATCTATATTCCATTCAGGATGTGGGTTTTAAGAATCAGTATTGTAATGGAAGTATCGCATGTCAATTCTGCTTGGCAGGATTTGATATGTTAGATAATTATAAAGCCATTGATGTAGTACAGTATGAAGCTGATAGGAGAGCATTTGTTGATTATACAGGTGTGTTAAAGATTGTCATTGAATTGATAGTTAGTTACGCCCTGTATACGGCATGGTTCTACCCATTGTTTGCTCTTATTAGTATTCAGATCTTGACCACTTGGCTGCCTGAGCTTTTTATGCTTAGTACATTACATTGGAGTGTTAGGTTGCTGGTGTCTTTAGCTAATATGTTACCAGCACATGTGTTTATGAGGTTTTATATTATTATTGCCTCTTTTATTAAGCTGTTTATCTTGTTTAGGCATGTTGCCTATGGTTGTAGTAAACCTGGTTGTTTGTTTTGTTACAAGAGGAATCGTAGTCTACGTGTTAAATGTAGTACTATTGTTGGTGGCATGATACGCTATTACGATGTTATGGCTAATGGTGGCACTGGCTTTTGTTCAAAACATCAATGGAATTGCATTGATTGTGATTCTTATAAACCAGGTAATACTTTTATTACTGTTGAGGCCGCTCTTGATTTATCTAAGGAATTGAAACGGCCTATTCAGCCTACAGATGTTGCTTATCATACGGTTACGGATGTTAAGCAAGTTGGTTGTTATATGCGCTTGTTCTATGAGCGTGATGGACAGCGCACATATGATGATGTTAATGCTAGTTTGTTTGTGGATTATAGTAATTTGCTACATTCTAAGGTTAAGGGTGTGCCTAATATGCATGTTGTGGTAGTGGAAAATGATGCCGATAAAGCTAATTTTCTTAATGCTGCTGTATTTTATGCACAGTCTTTGTTTAGACCTATTTTAATGGTTGATAAAAATCTGATAACTACTGCTAATACTGGTACGTCTGTTACAGAAACTATGTTTGATGTTTATGTGGACACATTTTTGTCTATGTTTGATGTGGATAAAAAGAGTCTTAATGCTTTAATAGCAACTGCGCATTCTTCTATAAAACAGGGTACGCAGATTTGTAAAGTTTTGGATACCTTTTTAAGCTGTGCTCGTAAAAGTTGTTCTATTGATTCAGATGTTGATACTAAGTGTTTAGCTGATTCTGTCATGTCTGCTGTATCGGCAGGCCTTGAATTGACGGATGAAAGTTGTAATAACTTGGTGCCAACATATTTGAAGGGTGATAACATTGTGGCAGCTGATTTAGGTGTTCTGATTCAAAATTCTGCTAAGCATGTGCAGGGTAATGTTGCTAAAATAGCCGGTGTTTCCTGTATATGGTCTGTGGATGCTTTTAATCAGCTAAGTTCTGATTTCCAGCATAAATTGAAGAAAGCATGTTGTAAAACTGGTTTGAAATTGAAGCTTACTTATAATAAGCAGATGGCTAATGTCTCTGTTTTAACTACACCCTTTAGTCTTAAAGGGGGTGCAGTTTTTAGTTATTTTGTTTATGTATGTTTTCTGTTGAGTTTGGTTTGTTTTATTGGATTGTGGTGCTTAATGCCCACTTACACAGTACACAAATCAGATTTTCAGCTTCCCGTTTATGCCAGTTATAAAGTTTTAGATAATGGTGTTATTAGAGATGTTAGCGTTGAAGATGTTTGTTTCGCTAACAAATTTGAACAATTTGATCAATGGTATGAGTCTACATTTGGTCTAAGTTATTATAGTAACAGTATGGCTTGTCCCATTGTTGTTGCTGTAGTAGACCAGGATCTTGGCTCTACTGTGTTTAATGTCCCTACCAAAGTGTTACGATATGGTTACCATGTGTTGCACTTTATTACACATGCACTTTCTGCTGATGGAGTGCAGTGTTATACGCCACATAGTCAAATATCGTATTCTAATTTTTATGCTAGTGGCTGTGTGCTTTCCTCCGCTTGTACTATGTTTGCAATGGCCGATGGTAGTCCACAACCTTATTGTTATACAGAGGGGCTTATGCAGAATGCTTCTCTGTATAGTTCATTGGTACCTCACGTGCGGTATAATCTTGCTAATGCTAAAGGTTTTATCCGTTTTCCAGAAGTGTTGCGAGAAGGACTTGTGCGTATTGTGCGTACTCGTTCTATGTCGTATTGCAGAGTTGGATTATGTGAGGAAGCTGATGAGGGTATATGCTTTAACTTTAATGGTTCTTGGGTGCTTAATAATGATTATTATAGATCATTGCCTGGGACCTTTTGTGGTAGAGATGTTTTTGACTTAATTTATCAGCTTTTTAAAGGTTTAGCACAGCCTGTGGATTTCTTGGCATTGACTGCTAGTTCTATTGCTGGTGCTATACTTGCTGTAATTGTTGTTTTGGTGTTTTATTACTTAATAAAGCTTAAACGTGCTTTTGGTGATTACACCAGTATTGTTTTTGTCAATGTGATTGTGTGGTGTGTAAATTTTATGATGCTTTTTGTGTTTCAAGTTTACCCTACACTTTCTTGTGTATATGCTATTTGTTATTTTTATGCCACGCTTTATTTCCCTTCGGAGATAAGTGTGATAATGCATTTACAATGGCTAGTTATGTATGGCACTATTATGCCTTTATGGTTTTGTTTGCTATATATATCTGTTGTTGTTTCAAATCATGCTTTTTGGGTATTCGCTTACTGCAGACGGCTTGGTACTTCTGTTCGTAGTGATGGTACATTTGAAGAAATGGCTCTTACTACTTTTATGATTACAAAAGATTCTTATTGTAAGCTTAAGAATTCTTTGTCTGATGTTGCTTTTAATAGATATTTGAGTTTGTATAATAAATATAGGTATTACAGCGGTAAAATGGATACTGCTGCATATAGGGAGGCTGCTTGTTCGCAGTTGGCTAAAGCAATGGATACATTTACCAATAATAATGGTAGTGATGTGCTTTACCAACCACCTACTGCTTCCGTTTCAACTTCATTCTTGCAATCTGGTATTGTGAAAATGGTTAATCCTACTTCTAAGGTAGAACCATGTATTGTCAGTGTTACCTATGGTAATATGACATTGAATGGTTTATGGTTGGATGATAAGGTCTACTGTCCCAGACATGTGATATGTTCTGCTTCAGATATGACTAATCCAGATTATACAAATTTGTTGTGTAGAGTAACATCAAGTGATTTTACTGTATTGTTTGATCGTTTAAGCCTTACAGTGATGTCTTATCAAATGCAGGGTTGTATGCTTGTTCTTACAGTGACCCTGCAAAATTCTCGTACGCCAAAATATACATTTGGTGTGGTTAAACCTGGTGAGACTTTTACTGTTTTAGCTGCTTATAACGGCAAACCACAAGGAGCCTTTCATGTGACTATGCGTAGTAGTTATACCATTAAGGGTTCCTTTTTATGCGGATCTTGTGGGTCTGTTGGTTATGTGCTAATGGGTGATTGTGTTAAATTTGTGTATATGCATCAATTGGAGCTTAGTACTGGTTGTCATACTGGTACTGATTTCAATGGGGATTTTTATGGTCCTTATAAGGATGCTCAGGTTGTCCAATTGCCCGTTCAGGATTATATACAATCTGTTAATTTTGTAGCATGGCTTTATGCTGCTATACTTAATAATTGTAATTGGTTTGTACAAAGTGATAAGTGTTCTGTTGAAGATTTTAATGTGTGGGCTTTGTCTAATGGGTTTAGCCAAGTTAAATCTGATCTTGTTATAGATGCTTTAGCTTCTATGACTGGTGTGTCTTTGGAAACATTATTGGCTGCTATTAAGCGTCTCAAGAATGGTTTTCAAGGACGTCAGATTATGGGTAGTTGCTCCTTTGAGGATGAATTGACACCTAGCGATGTTTATCAACAACTCGCTGGTATCAAGTTACAATCAAAGCGTACTAGATTGGTTAAAGGCATTGTTTGTTGGATTATGGCTTCTACATTTTTGTTTAGTTGTATAATTACAGCATTTGTGAAATGGACTATGTTTATGTATGTAACTACTAATATGCTTAGTATTACGTTTTGTGCACTTTGTGTTATAAGTTTGGCCATGTTGTTGGTTAAACATAAGCATCTTTATTTGACTATGTATATAATTCCTGTGCTTTTTACACTGCTGTATAACAACTATTTGGTTGTGTACAAGCAGACATTTAGAGGCTATGTTTATGCATGGCTATCATATTATGTTCCATCAGTTGAGTATACTTATACTGATGAAGTTATTTACGGCATGTTATTGCTTATAGGAATGGTCTTTGTTACATTACGTAGCATTAACCATGATTTGTTTTCTTTTATAATGTTTGTTGGTCGTGTGATTTCTGTTGTCTCTTTGTGGTACATGGGTTCTAACTTAGAGGAAGAAATTCTTCTTATGTTGGCTTCTCTTTTTGGTACTTACACATGGACAACAGCTTTATCTATGGCTGCAGCAAAGGTTATTGCTAAGTGGGTTGCTGTGAATGTTTTGTATTTCACAGATATACCTCAAATTAAGATAGTTCTTGTATGCTATTTGTTTATAGGTTATATTATTAGCTGTTATTGGGGTTTGTTTTCCTTGATGAACAGTTTGTTTAGAATGCCTTTGGGTGTTTATAATTATAAAATTTCAGTACAGGAATTAAGATATATGAATGCTAATGGATTGCGCCCTCCTAAGAATAGTTTTGAAGCCCTTATGCTTAATTTTAAGCTTTTGGGTATTGGAGGTGTGCCAATTATTGAAGTATCTCAATTTCAATCAAAATTGACTGATGTTAAATGTGCTAATGTTGTCTTGCTTAATTGCTTGCAACATTTGCATGTTGCTTCTAATTCTAAGTTGTGGCAGTATTGTAGCACTTTGCACAATGAAATACTTGCCACTTCTGATCTGGGTGTTGCTTTTGAAAAGCTTGCTCAGTTGTTAATTGTTTTGTTTGCTAATCCAGCTGCTGTGGATAGCAAGTGCCTGACTAGTATTGAAGAAGTTTGCGATGATTACGCAAAGGACAATACTGTTTTGCAGGCTTTACAGAGTGAATTTGTTAATATGGCTAGCTTCGTTGAATATGAAGTTGCTAAGAAAAATCTTGATGAGGCGCGTTCTAGTGGTTCTGCTAATCAACAGCAGTTAAAACAGCTAGAGAAAGCCTGTAATATTGCTAAATCTGCTTATGAACGCGACCGTGCTGTAGCAAGAAAGTTGGAGCGTATGGCAGATTTGGCTCTCACTAATATGTATAAAGAAGCTAGAATTAATGATAAGAAGAGTAAGGTTGTTTCTGCCTTGCAAACTATGCTTTTTAGTATGGTGCGTAAGTTAGATAATCAAGCTCTGAATTCAATATTAGATAATGCTGTGAAGGGTTGTGTACCATTGAATGCAATCCCTTCATTGGCTGCAAATACTCTGACTATAATTGTACCAGATAAAAGTGTTTACGATCAGGTAGTTGACAATGTCTATGTTACCTATGCGGGTAATGTATGGCAGATTCAAACTATCCAAGATTCAGATGGTACAAATAAGCAGTTGAATGAGATATCTGATGATTGTAACTGGCCACTAGTTATTATTGCAAATCGGCATAATGAGGTATCTGCAACCGTTTTGCAAAATAATGAATTAATGCCTGCTAAGTTGAAAACTCAGGTCGTTAATAGTGGTCCAGATCAGACTTGTAACACACCTACTCAATGTTACTATAATAATAGTAACAATGGGAAGATTGTTTATGCTATACTTAGTGATGTTGATGGTCTTAAGTATACAAAGATTCTTAAAGATGATGGCAATTTTGTTGTTTTGGAGTTAGATCCTCCTTGTAAATTTACTGTTCAAGATGTTAAAGGTCTTAAAATTAAGTACCTTTATTTTGTAAAAGGTTGTAACACACTAGCAAGAGGCTGGGTTGTTGGTACAATTTCTTCTACAGTTAGATTGCAAGCTGGAACTGCTACTGAGTATGCTTCCAACTCATCTATATTATCTTTATGTGCGTTTTCTGTAGATCCTAAGAAAACGTATTTAGATTTTATACAGCAGGGAGGAACACCTATTGCCAATTGTGTTAAAATGTTGTGTGACCATGCTGGTACCGGTATGGCCATTACTGTTAAACCCGATGCTACCACTAATCAGGATTCATATGGTGGTGCGTCTGTTTGTATATATTGCCGCGCACGAGTTGAACACCCAGATGTTGATGGGTTGTGCAAATTACGCGGCAAGTTTGTACAAGTGCCTGTAGGTATAAAAGATCCTGTGTCTTATGTTTTGACACATGATGTTTGTCAAGTTTGTGGATTTTGGCGGGATGGAAGTTGTTCATGTGTTAGCACTGACACTACTGTTCAGTCAAAAGATACTAATTTTTTAAACCGGGGTACGAGTGTAGATGCCCGTCTCGTACCCTGTGCCAGTGGTTTATCTACTGATGTACAATTAAGGGCATTTGATATTTGCAATGCTAGTGTTGCTGGCATTGGTTTACATTTAAAAGTTAATTGCTGCCGTTTTCAGCGTGTTGATGAGAACGGTGATAAATTAGATCAGTTCTTTGTTGTTAAGAGGACAGATCTGACTATATATAATAGAGAGATGGAATGCTATGAGCGTGTAAAAGATTGTAAGTTTGTGGCTGAACACGATTTCTTTACATTTGATGTAGAAGGTAGTCGTGTGCCACATATTGTACGCAAGGATTTAACAAAGTATACTATGTTGGATCTTTGCTATGCGTTGCGACATTTTGATCGCAATGATTGCATGCTGCTTTGTGACATTCTCTCTATATATGCTGGTTGTGAACAATCCTACTTTACTAAGAAGGATTGGTATGATTTTGTTGAAAATCCTGATATTATTAATGTTTATAAAAAGCTAGGACCTATTTTTAATAGAGCCCTAGTTAGCGCTACTGAGTTTGCAGACAAATTGGTGGAGGTAGGCTTAGTAGGCATTTTAACACTTGATAACCAAGATTTAAATGGTAAATGGTATGATTTTGGTGACTATGTTATTGCAGCCCCAGGTTGTGGTGTTGCTATAGCAGACTCTTATTATTCTTATATGATGCCTATGCTGACCATGTGTCATGCATTGGATTGTGAATTGTATGTGAATAATGCTTATAGACTATTTGATCTTGTACAGTATGATTTTACTGATTACAAGCTCGAATTGTTTAATAAGTATTTTAAGCACTGGAGTATGCCATACCATCCTAACACGGTTGATTGTCAGGATGATCGGTGTATCATACATTGTGCTAATTTTAACATACTTTTTAGTATGGTTTTACCTAATACATGTTTTGGGCCTCTTGTTAGGCAAATTTTTGTGGATGGTGTTCCTTTTGTTGTTTCAATTGGATACCATTATAAAGAACTTGGTATTGTGATGAATATGGATGTGGATACACATCGTTATCGCTTGTCTTTAAAAGACTTGCTTTTATATGCTGCTGATCCAGCTTTGCATGTAGCTTCTGCTAGTGCATTGTATGATTTACGCACTTGCTGTTTTAGTGTTGCGGCTATAACAAGCGGTGTAAAATTTCAAACAGTTAAACCTGGTAATTTTAATCAGGATTTTTATGATTTTATTTTAAGTAAGGGCCTGCTTAAAGAGGGTAGTTCAGTTGATCTGAAGCACTTTTTCTTTACGCAGGATGGTAATGCTGCTATCACTGATTATAATTATTATAAGTACAATTTGCCCACCATGGTGGACATTAAGCAGTTGTTGTTTGTTTTGGAAGTTGTTTATAAGTATTTTGAGATTTATGATGGTGGGTGTATACCGGCATCACAAGTCATTGTTAATAATTATGATAAGAGTGCTGGCTATCCATTTAATAAATTTGGAAAAGCCAGGCTCTATTATGAAGCATTATCATTTGAGGAGCAGGATGAAATTTACGCCTATACTAAGCGCAATGTCCTGCCAACACTTACTCAAATGAATTTGAAATATGCTATTAGTGCTAAGAATAGAGCCCGCACTGTCGCTGGTGTTTCCATACTTAGTACTATGACTGGCAGAATGTTTCATCAAAAGTGTTTGAAAAGTATAGCAGCTACACGTGGTGTTCCTGTTGTTATAGGCACCACTAAATTTTATGGCGGCTGGGATGATATGTTACGTCGCCTTATTAAAGATGTTGATAATCCTGTACTTATGGGTTGGGATTATCCTAAGTGTGATCGTGCTATGCCAAACATACTACGTATTGTTAGTAGTCTGGTTTTGGCTCGAAAACATGAGGCATGTTGTTCGCAAAGCGATAGGTTTTATCGACTTGCGAATGAATGCGCACAAGTTCTGAGTGAAATTGTTATGTGTGGTGGCTGTTATTATGTTAAGCCTGGTGGCACTAGTAGTGGTGATGCAACTACTGCTTTTGCTAATTCAGTTTTTAACATATGTCAAGCTGTTTCAGCCAATGTATGTGCTTTAATGTCATGCAATGGTAATAAGATTGAAGATTTGAGTATACGTGCTCTTCAGAAGCGCTTATACTCACATGTGTATAGAAGTGATATGGTTGATTCAACCTTTGTCACAGAATATTATGAATTTTTAAATAAGCATTTTAGTATGATGATTTTGAGTGATGATGGCGTTGTGTGTTATAATTCTGACTATGCGTCCAAAGGGTATATTGCTAATATAAGTGCCTTTCAACAGGTATTGTATTATCAAAATAACGTTTTTATGTCAGAATCCAAATGTTGGGTTGAAAATGACATAAATAATGGACCTCATGAATTCTGTTCACAACACACAATGCTTGTAAAGATGGATGGGGACGATGTCTATCTTCCATATCCTGATCCTAGTCGTATATTAGGAGCTGGATGTTTTGTAGATGATTTGTTAAAGACTGATAGTGTTCTTTTAATAGAACGATTTGTAAGTCTTGCAATAGATGCTTATCCACTTGTGTACCACGAAAATGAAGAATACCAAAAGGTTTTTCGTGTTTATTTGGAGTATATAAAGAAGTTGTACAATGACCTGGGTAATCAGATCTTGGATAGCTACAGTGTTATTTTAAGTACTTGTGATGGACAAAAGTTTACTGATGAGTCCTTTTACAAGAACATGTATTTAAGAAGTGCAGTTATGCAGAGTGTTGGAGCTTGCGTGGTCTGCTCTTCTCAAACATCATTACGTTGTGGCAGTTGCATCAGAAAGCCTCTTCTTTGCTGCAAGTGTTGTTACGATCATGTTATGGCAACTGATCATAAATATGTTTTGAGTGTTTCACCATATGTGTGTAATGCACCAGGATGTGATGTAAATGATGTTACCAAATTGTATCTAGGTGGTATGTCATATTATTGTGAAGATCATAAGCCACAATATTCGTTTAAGTTGGTAATGAATGGTATGGTTTTTGGTCTATATAAACAATCTTGTACAGGATCTCCGTACATAGATGATTTTAATCGTATAGCTAGTTGTAAATGGACTGATGTTGATGATTACATACTGGCTAATGAATGTACAGAGCGCTTGAAATTGTTTGCTGCAGAAACGCAAAAGGCGACTGAGGAAGCCTTTAAGCAGAGTTATGCATCAGCAACAATACAAGAGATTGTTAGCGAGCGCGAATTGATCCTCTCTTGGGAGATTGGAAAAGTGAAGCCACCACTTAATAAAAATTATGTTTTTACTGGCTACCATTTTACTAAAAATGGCAAGACAGTTTTAGGTGAGTATGTTTTTGATAAGAGTGAGTTGACTAATGGTGTGTATTATCGCGCCACAACCACTTATAAGCTATCTGTTGGAGATGTTTTTGTTTTAACCTCTCATTCAGTAGCTAATTTAAGTGCTCCTACGCTGGTGCCGCAGGAGAATTATAGTAGTATTAGATTCGCTAGTGTTTATAGTGTGCTTGAGACGTTTCAGAACAATGTCGTTAATTATCAACACATTGGTATGAAACGTTATTGCACCGTGCAAGGACCTCCTGGTACAGGAAAGTCACATCTTGCTATTGGTCTTGCTGTTTATTATTGTACAGCACGTGTAGTATACACTGCGGCCAGCCATGCAGCTGTTGACGCATTGTGTGAAAAAGCATACAAATTTTTGAATATAAATGACTGCACTCGTATTGTTCCTGCCAAGGTCAGGGTGGAGTGCTATGATAAGTTTAAAATTAATGACACCACTCGTAAGTATGTGTTTACTACTATAAATGCATTACCTGAGATGGTGACTGATATTGTTGTTGTAGATGAAGTTAGTATGCTTACCAATTATGAGCTTTCTGTTATTAATGCTCGTATTCGTGCTAAGCATTATGTTTACATTGGTGATCCTGCTCAATTGCCAGCACCACGTGTGTTATTGAGCAAGGGTACACTTGAACCTAAATATTTTAACACTGTTACTAAGCTTATGTGTTGCTTAGGGCCAGACATTTTTCTTGGTACATGTTATAGATGTCCTAAGGAAATTGTTGATACAGTGTCTGCCTTGGTTTATGAAAATAAGCTTAAGGCTAAGAATGAAAGTAGTTCATTGTGTTTTAAGGTCTATTATAAAGGCGTTACAACACATGAAAGTTCTAGTGCTGTAAATATGCAGCAGATTTATTTGATTAATAAGTTTTTGAAGGCTAACCCTTTGTGGCATAAAGCCGTTTTTATTAGCCCATATAATAGCCAGAACTTTGCAGCTAAGCGTGTTTTGGGTTTGCAAACCCAGACCGTGGATTCTGCTCAAGGTTCTGAATATGATTATGTTATATATTCACAGACTGCAGAAACAGCGCATTCTGTAAATGTTAATCGCTTCAATGTTGCTATTACTCGAGCCAAGAAAGGTATTCTTTGTGTTATGAGTAATATGCAGTTGTTTGAAGCATTACAGTTTACTACATTGACCTTAGATAAAGTGCCACAGGCCGTTGAAACGAGAGTTCAATGTAGTACCAATTTATTTAAAGATTGTAGCAAGAGTTATAGTGGTTACCACCCAGCTCACGCTCCTTCATTTTTGGCAGTAGATGACAAATATAAGGCAACTGGCGATTTAGCCGTGTGTCTTGGTATTGGAGATTCTGCTGTTACATATTCAAGATTAATATCACTCATGGGTTTTAAACTTGATGTCACCCTTGATGGGTATTGTAAGCTTTTTATAACTAAAGAAGAAGCTGTTAAACGCGTGCGTGCTTGGGTTGGCTTTGATGCTGAAGGCGCTCATGCCACGCGTGATAGCATTGGGACAAATTTCCCACTTCAATTAGGGTTTTCTACAGGAATTGATTTTGTTGTGGAAGCCACTGGTTTGTTTGCTGATAGAGATGGTTACAGCTTTAAAAAGGCTGTGGCTAAAGCTCCTCCTGGTGAACAATTTAAGCATCTCATCCCTTTGATGACGAGAGGTCAGCGCTGGGATGTTGTTAGACCTAGAATAGTACAAATGTTTGCAGATCATTTAATTGATCTGTCTGATTGTGTTGTGCTAGTTACATGGGCAGCCAACTTTGAGCTCACTTGTCTCCGATACTTTGCAAAAGTAGGTCGTGAGATCTCTTGTAATGTGTGCACTAAACGTGCCACAGCTTACAATTCTAGAACTGGTTACTATGGTTGTTGGCGCCATAGTGTTACATGTGATTACTTGTATAATCCACTTATTGTTGATATTCAACAGTGGGGATATATTGGATCTTTATCAAGTAATCATGATTTATATTGTAGTGTCCACAAAGGAGCACATGTTGCTTCATCTGATGCTATAATGACACGGTGTTTGGCCGTTTATGATTGTTTTTGCAATAATATTAATTGGAATGTGGAGTATCCCATTATTTCAAATGAGTTAAGTATTAATACCTCTTGTAGGGTCTTGCAGCGTGTTATGCTTAAAGCTGCAATGCTCTGCAACAGATATACTTTGTGTTATGATATTGGCAACCCAAAAGCGATTGCCTGTGTCAAAGATTTTGATTTTAAGTTCTATGATGCCCAACCAATTGTTAAGTCTGTCAAGACTCTTTTGTATTCTTTTGAGGCACATAAGGACTCTTTTAAAGATGGTTTGTGTATGTTTTGGAACTGTAATGTGGATAAGTATCCACCGAATGCAGTTGTATGTAGATTTGACACGAGAGTGTTGAATAATTTAAATCTTCCTGGCTGTAATGGAGGTAGTTTGTATGTTAATAAACATGCATTCCACACTAAACCCTTTTCTAGGGCAGCCTTTGAGCATTTGAAGCCTATGCCATTTTTCTATTATTCAGATACGCCTTGTGTGTATATGGATGGCATGGATGCTAAGCAGGTTGATTATGTACCTTTGAAATCCGCCACTTGCATCACAAGATGCAATTTAGGTGGTGCAGTTTGTTTAAAACATGCTGAAGAGTATCGTGAGTACCTAGAGTCTTACAATACAGCTACTACAGCAGGTTTTACTTTTTGGGTCTATAAGACATTTGATTTTTATAATTTGTGGAATACGTTCACCAAGCTACAAAGCTTGGAGAACGTTGTATATAATTTAGTCAAAACTGGTCATTATACAGGACAGGCTGGTGAAATGCCTTGTGCCATTATAAATGATAAAGTCGTGGCTAAGATCGATAAGGAGGATGTTGTCATTTTTATTAATAATACAACATACCCTACTAATGTTGCTGTTGAATTATTTGCCAAGCGCAGTATTCGACACCATCCAGAGCTTAAGCTCTTTAGAAATTTGAATATAGACGTGTGTTGGAAGCACGTCATTTGGGATTATGCTAGAGAAAGTATATTTTGCAGTAATACCTATGGTGTCTGCATGTATACAGATTTAAAGTTCATTGATAAATTGAATGTCCTTTTTGATGGTCGTGATAATGGTGCTCTTGAAGCTTTTAAACGCTCTAATAATGGCGTTTACATTTCCACGACAAAAGTTAAGAGTCTTTCGATGATAAAAGGTCCACCGCGTGCTGAATTAAATGGCGTAGTGGTGGACAAGGTTGGAGACACTGATTGTGTGTTTTATTTTGCTGTGCGTAAAGAGGGTCAGGATGTCATCTTCAGCCAATTCGACAGCCTGAGAGTCAGCTCTAACCAGAGCCCACAAGGTAATCTGGGGAGTAATGAACCCGGTAATGTCGGTGGTAATGATGCTCTGGCAACCTCCACTATCTTTACACAAAGCCGTGTTATTAGCTCTTTTACATGTCGTACTGATATGGAAAAAGATTTTATAGCTTTAGATCAAGACTTGTTTATTCAGAAGTATGGTTTGGAGGACTATGCCTTTGAACACATTGTTTATGGTAATTTCAACCAGAAGATTATTGGTGGTTTGCATTTGTTAATAGGCTTGTACCGAAGACAGCAAACTTCCAATCTGGTTATTCAGGAGTTTGTTTCATACGACTCCAGCATACACTCTTATTTTATCACTGATGAGAAGAGTGGTGGTAGTAAGAGTGTTTGCACTGTTATAGATATTTTGTTGGATGATTTTGTGGCTCTTGTTAAGTCACTTAATCTCAACTGTGTGAGTAAGGTTGTTAACGTTAATGTTGATTTTAAAGATTTTCAGTTCATGCTTTGGTGTAACGATGAGAAAGTTATGACTTTCTATCCTCGTTTGCAAGCTGCATCTGACTGGAAGCCTGGTTATTCTATGCCTGTATTATACAAGTATTTGAATTCCCCAATGGAAAGAGTTAGTCTCTGGAATTATGGGAAGCCGGTTACTTTGCCTACAGGCTGTATGATGAATGTTGCTAAGTATACTCAGTTATGTCAATATCTGAATACTACAACATTAGCTGTACCTGTTAATATGCGAGTTTTGCATTTAGGTGCAGGTTCAGAAAAAGGAGTAGCACCGGGTTCTGCAGTTCTTAGGCAGTGGTTGCCTGCTGGTACTATTCTTGTAGATAATGATTTATACCCATTTGTGAGTGACAGTGTCGCTACATATTTTGGGGATTGTATAACCTTACCCTTTGATTGTCAATGGGATTTGATAATTTCTGATATGTATGACCCTATTACTAAGAACATAGGGGAGTACAATGTAAGTAAAGATGGTTTCTTTACATACATTTGTCATATGATTCGCGACAAGTTAGCTCTGGGTGGCAGTGTTGCTATAAAAATAACAGAGTTTTCTTGGAATGCAGAATTATATAAGTTAATGGGGTATTTTGCATTTTGGACGGTTTTCTGCACAAATGCAAACGCTTCTTCTAGTGAAGGGTTTTTAATTGGCATAAATTATTTGGGTAAGCCCAAGGTTGAGATAGATGGAAATGTTATGCATGCCAATTATTTGTTTTGGAGAAATTCCACAGTTTGGAACGGGGGTGCTTATAGCCTGTTTGACATGGCTAAATTCCCGCTTAAGTTGGCTGGTACTGCCGTAATAAATTTAAGAGCAGACCAGATTAATGATATGGTTTATTCCCTTCTTGAAAAGGGTAAACTACTTGTTAGAGATACAAATAAAGAAGTTTTTGTTGGTGACAGTTTGGTTAATGTAATCATGGCAGTCGCTTATGCAGACAAGCCTAATCACTTTATCAATTTTCCACTTACCCAGTTTCAGGGCTTTGTGTTAAATTATAAAGGTTTACAATTTCAACTTCTCGATGAAGGAGTGGATTGTAAAATACAAACAGCGCCTCACATTAGTCTTGCTATGCTGGATATTCAGCCTGAAGACTACAGAAGTGTTGATGTTGCTATTCAAGAAGTTATTGATGATATGCATTGGGGTGAGGGCTTTCAGATTAAATTTGAAAACCCCCATATCCTAGGAAGATGCATAGTTTTAGATGTTAAAGGTGTAGAAGAATTGCATGATGATTTAGTTAATTACATTCGTGATAAAGGTTGTGTTGCTGACCAATCCAGGAAGTGGATTGGACATTGCACCATAGCCCAACTCACTGATGCTGCACTTTCCATTAAGGAAAATGTTGATTTTATAAACAACATGCAATTCAACTATAAAATCACTATCAATCCCTCATCACCGGCTAGACTTGAAATAGTTAAGCTTGGTGCTGAAAGGAAAGATGGTTTTTATGAAACCATAGCTAGCCACTGGATGGGAATTCGTTTTGAATATAATCCACCCACTGATAAGCTAGCTATGATTATGGGTTATTGTTGTTTAGAAGTGGTGCGTAAAGAGCTAGAAGAAGGTGACCTTCCCGAGAATGATGATGATGCTTGGTTTAAGCTATCGTACCATTATGAAAACAATTCTTGGTTCTTTCGACATGTCTACAGGAAAAGTTCTTATTTCCGTAAGTCTTGTCAAAATTTAGATTGTAATTGTTTGGGGTTTTATGAATCTTCAGTTGAAGAAGACATGTTTTTGATACTTTTAATTTCCTTACCAACGGCTTTTGCTGTTATAGGAGATTTAAAGTGTACTACAGTTTCCATTAATGATGTTGACACTGGTGTTCCTTCTATTAGCACTGATACTGTCGATGTTACTAATGGTTTAGGTACTTATTATGTTTTAGATCGTGTGTATTTAAATACTACGTTGTTGCTTAATGGTTACTACCCTACTTCAGGTTCTACATATCGTAATATGGCACTGAAGGGAACTTTACTATTGAGCACACTGTGGTTTAAACCACCTTTTCTTTCTGATTTTACTAATGGTATTTTTGCTAAGGTCAAAAATACCAAGGTTATTAAAGATGGTGTAATGTATAGTGAGTTTCCTGCTATAACTATAGGTAGTACTTTTGTAAATACATCTTATAGTGTGGTAGTACAACCACATACTACCATTTTGGGTAATAAATTACAAGGTTTCTTAGAGATCTCTGTTTGCCAGTATACTATGTGCGAGTACCCAAATACGATTTGTAATCCTAATCTGGGTAATCAACGCGTAGAACTATGGCATTGGGATACAGGTGTTGTTTCCTGTTTATATAAGCGTAATTTCACATACGATGTGAATGCTGATTATTTGTATTTCCATTTTTATCAAGAAGGTGGTACTTTTTATGCATATTTTACAGACACTGGTGTTGTTACTAAGTTTCTGTTTAATGTTTATTTAGGCACGGTGCTCTCACATTATTATGTCATGCCTTTGACTTGTAATAGTGCTCTGACTTTAGAATATTGGGTTACACCCCTCACTTCTAAACAATATCTACTAGCTTTCAATCAAGATGGTGTTATTTTTAATGCTGTTGATTGTAAGAGTGATTTTATGAGTGAGATTAAGTGTAAAACACTATCTATAGCACCATCTACTGGTGTTTATGAATTAAACGGTTACACTGTTCAGCCAATTGCAGATGTTTACCGACGTATACCTAATCTTCCCGATTGCAATATTGAGGCTTGGCTTAATGATAAGTCGGTGCCCTCTCCATTAAATTGGGAACGTAAGACCTTTTCAAATTGTAATTTTAATATGAGCAGCCTGATGTCTTTTATTCAGGCATACTCATTTACTTGTAATAATATTGATGCTGCTAAGATATATGGTATGTGTTTTTCCAGCATAACTATAGATAAGTTTGCAATACCCAATGGTAGGAAGGTTGACCTACAATTGGGTAATTTGGGCTATTTGCAGTCTTTTAATTATAGAATTGATACTACTGCTACAAGTTGTCAGTTGTATTATAATTTACCTGCTGCTAATGTTTCTGTTAGCAGGTTTAATCCTTCTACTTGGAATAGGAGATTTGGTTTTACAGAACAATCTGTTTTTAAGCCTCAACCTGCAGGTGTTTTTACTGATCATGATGTTGTTTATGCACAACATTGTTTTAAAGCTTCCACAAATTTCTGTCCGTGTAAATTGGATGGGTCTTTGTGTGTAGGTAATGGTCCTGGTATAGATGCTGGTTATAAAACTAGTGGCATAGGCACTTGTCCTGCAGGTACTAATTATTTAACTTGCCATAATGCTGCCCAATGTGATTGTTTGTGCACCCCAGACCCCATTACATCTAAAGCTACAGGGCCTTACAAGTGCCCCCAAACTAAATATTTAGTTGGCATAGGTGAGCACTGTTCGGGTCTTGCTATTAAAAGTGATCATTGTGGAGGTAATCCTTGTACTTGCCAACCACAAGCATTTTTGGGTTGGTCTGTTGACTCTTGTTTACAAGGGGATAGGTGTAATATTTTTGCTAATTTTATTTTGCATGATGTTAATAGTGGTACTACTTGTTCTACTGATTTACAAAAATCAAACACAGACATAATTCTTGGTGTTTGTGTTAATTATGATCTTTATGGTATTACTGGCCAAGGTATTTTTGTTGAGGTTAATGCGACTTATTATAATAGTTGGCAGAACCTTTTATATGATTCTAATGGTAATCTCTATGGTTTTAGAGACTACTTAACAAATAGAACTTTTATGATTCGTAGTTGCTATAGTGGTCGTGTTTCAGCGGCCTTTCATGCTAACTCTTCCGAACCAGCATTGCTATTTCGGAATATCAAATGCAATTACGTTTTTAATAACACTCTTTCACGACAGCTGCAACCTATTAACTATTTTGATAGCTATCTTGGTTGTGTTGTCAATGCTGATAATAGTACTTCTAGTGTTGTTCAAACATGTGATCTCACAGTAGGTAGTGGTTACTGTGTGGATTACTCTACAAAAAGACGAAGTCGTAGATCGATTACCACTGGTTATCGGTTTACTAATTTTGAGCCATTTACTGTTAATTCAGTAAATGATAGTTTAGAACCTGTAGGTGGTTTGTATGAAATTCAAATACCTTCAGAGTTTACTATAGGTAATATGGAGGAGTTTATTCAAACAAGCTCTCCTAAAGTTACTATTGATTGTTCTGCTTTTGTCTGTGGTGATTATGCAGCATGTAAATCACAGTTGGTTGAATATGGTAGCTTCTGTGACAATATTAATGCTATACTCACAGAAGTAAATGAACTACTTGACACTACACAGTTGCAAGTAGCTAATAGTTTAATGAATGGTGTCACTCTTAGCACTAAGCTTAAAGATGGCGTTAATTTCAATGTAGACGACATCAATTTTTCCCCTGTATTAGGTTGTTTAGGAAGCGATTGCAATAAAGTTTCCAGTAGATCTGCTATAGAGGACTTACTTTTTTCTAAAGTAAAGTTATCTGATGTCGGTTTCGTTGAGGCTTATAATAATTGTACTGGAGGTGCCGAAATTAGGGACCTCATTTGTGTGCAAAGTTATAATGGTATCAAGGTGTTGCCTCCACTGCTCTCGGAAAATCAGATCAGTGGATACACTTTGGCTGCCACTTCTGCTAGCCTGTTTCCTCCATGGTCAGCAGCAGCAGGTGTACCATTCTATTTAAACGTTCAGTATCGTATTAATGGTATTGGTGTTACCATGGATGTGTTAAGTCAAAATCAAAAGCTTATTGCTAATGCATTTAACAATGCTCTTGGTGCTATTCAGGAAGGGTTTGATGCTACCAATTCTGCTTTAGTTAAAATTCAAGCTGTTGTTAATGCAAATGCTGAAGCTCTTAATAACTTATTGCAACAACTCTCTAATAGATTTGGTGCTATAAGTTCTTCTTTACAAGAAATTCTATCTAGACTGGATGCTCTTGAAGCGCAAGCTCAGATAGACAGACTTATTAATGGGCGTCTTACCGCTCTTAATGCTTATGTTTCTCAACAGCTTAGTGACTCTACACTAGTAAAGTTTAGTGCAGCACAAGCTATGGAGAAGGTTAATGAATGTGTCAAAAGCCAATCATCTAGGATAAATTTTTGTGGTAATGGTAATCATATTATATCATTAGTGCAGAATGCTCCATATGGTTTGTATTTTATCCACTTTAGCTATGTCCCTACTAAGTATGTCACTGCGAAGGTTAGTCCCGGCCTGTGCATTGCTGGTGATAGAGGTATAGCCCCTAAGAGTGGTTATTTTGTTAATGTAAATAATACTTGGATGTTCACTGGTAGTGGTTATTACTACCCTGAACCTATAACTGGAAATAATGTTGTTGTTATGAGTACCTGTGCTGTTAATTATACTAAAGCGCCGGATGTAATGCTGAACATTTCAACACCCAACCTCCCTTATTTTAAGGAAGAGTTGGATCAATGGTTTAAAAACCAAACATCAGTGGCACCAGATTTGTCACTTGATTATATAAATGTTACATTCTTGGACCTACAAGATGAAATGAATAGGTTACAGGAGGCAATAAAAGTTTTAAATCAGAGCTACATCAATCTCAAGGACATTGGTACATATGAGTATTATGTAAAATGGCCTTGGTATGTATGGCTTTTAATTGGCTTTGCTGGTGTAGCTATGCTTGTTTTACTATTCTTCATATGCTGTTGTACAGGATGTGGGACTAGTTGTTTTAAGAAATGTGGTGGTTGTTGTGATGATTATACTGGACACCAGGAGTTAGTAATTAAAACATCACATGAAGACATGTTTTTGCTTCCTAGATTTGTTCTAGTTAGCTGCATAATTGGTAGCCTAGGTTTTGACAACCCTCCTACCAATGTTGTTTCGCATTTAAATGGAGATTGGTTTTTATTTGGTGACAGTCGTTCAGATTGTAATCATGTTGTTACTACCAACCCCCGTAATTATTCTTATATGGACCTTAATCCTGCCTTGTGTGGTTCTGGTAAAATATCATCTAAAGCTGGCAACTCCATTTTTAGGAGTTTTCACTTTACCGATTTTTATAATTACACAGGCGAAGGTCAACAAATTATTTTCTATGAGGGTGTTAATTTTACGCCTTATCATGCCTTTAAATGCACCACTTCTGGTAGTAATGATATTTGGATGCAGAATAAAGGCTTGTTTTACACTCAGGTTTATAAGAATATGGCTGTGTATCGCAGCCTTACTTTTGTTAATGTACCATATGTTTATAATGGCTCTGCACAATCTACAGCCCTTTGTAAATCTGGTAGTTTAGTTCTTAATAACCCTGCATATATAGCTCGTGAAGCTAATTTTGGGGATTATTATTATAAGGTTGAAGCTGATTTTTATTTGTCAGGTTGTGACGAGTATATCGTACCACTTTGTATTTTCAACGGCAAGTTTTTGTCGAATACAAAGTATTATGATGATAGTCAATATTATTTTAATAAAGACACTGGTGTTATTTATGGTCTCAATTCTACTGAAACCATTACCACTGGTTTTGACTTTAATTGTCATTATTTAGTTCTACCCTCTGGTAATTATTTAGCCATTTCAAATGAGCTATTGTTAACTGTTCCTACTAAAGCAATCTGTCTTAATAAGCGTAAGGATTTTACGCCTGTACAGGTTGTTGATTCGCGGTGGAACAATGCCAGGCAGTCTGATAACATGACGGCAGTTGCTTGTCAACCCCCGTACTGTTATTTTCGTAATTCTACTACCAATTATGTTGGTGTTTATGATATCAATCATGGGGATGCTGGTTTTACTAGCATACTCAGTGGTTTGTTATATGACTCACCTTGTTTTTCGCAGCAAGGTGTTTTTAGGTATGATAATGTTAGCAGTGTCTGGCCTCTCTACCCCTATGGCAGATGCCCTACTGCTGCTGATATTAATACCCCTGATGTACCTATTTGTGTGTATGATCCGCTACCAATTATTTTGCTTGGCATTCTTTTGGGTGTTGCGGTCATAATTATTGTAGTTTTGTTGTTATATTTTATGGTGGATAATGGTACTAGGCTGCATGATGCTATGTTTATGGCTGATGCTTATTTTGCAGACACTGTGTGGTATGTGGGGCAAATAATTTTTATAGTTGCCATTTGTTTATTGGTTATAATAGTTGTAGTGGCATTTTTGGCAACTTTTAAATTGTGTATTCAACTTTGCGGTATGTGTAATACCTTAGTACTGTCCCCTTCTATTTATGTGTTTAATAGAGGTAGGCAGTTTTATGAGTTTTACAATGATGTAAAACCACCAGTTCTTGATGTGGATGACGTTATGAGTAGTGTAACTACACCAGCACCAGTTTACACCTGGACTGCTGATGAAGCTATTAAATTCCTAAAGGAATGGAACTTTTCTTTGGGTATTATACTACTTTTTATTACAGTCATATTGCAATTTGGATATACAAGTCGCAGTATGTTTGTTTATGTTATTAAGATGGTCATTTTGTGGCTTATGTGGCCCCTTACTATCATCTTAACTATTTTCAATTGCGTGTATGCGTTGAATAATGTGTATCTTGGCTTCTCTATAGTTTTTACTATAGTGGCCATTATTATGTGGATTGTGTATTTTGTGAATAGTATCAGGTTGTTTATTAGAACTGGAAGTTGGTGGAGTTTCAACCCAGAAACAAACAACTTGATGTGTATAGATATGAAGGGAAGGATGTATGTTAGGCCGATAATTGAGGACTACCATACCCTTACGGTCACAATAATACGTGGTCATCTTTACATGCAAGGTATAAAACTAGGTACTGGCTATTCTTTGTCAGATTTGCCAGCTTATGTGACTGTTGCTAAGGTCTCGCACCTGCTCACGTATAAGCGTGGTTTTCTTGACAAGATAGGCGATACTAGTGGTTTTGCTGTTTATGTTAAGTCCAAAGTCGGTAATTACCGACTGCCATCAACCCAAAAGGGTTCTGGCTTGGACACCGCATTGTTGAGAAATAATATCATGTCTTTTACTCCTGGTAAGCAATCCAGTAGTAGAGCGTCCTCTGGAAATCGTTCTGGTAATGGCATCCTTAAGTGGGCCGATCAGTCCGACCAATCTAGAAATGTTCAAACCAGGGGTAGAAGAGCTCAACCCAAGCAAACTGCTACTTCTCAGCAACCATCAGGAGGGAATGTTGTACCCTACTATTCTTGGTTCTCTGGAATTACTCAGTTTCAAAAGGGAAAGGAGTTTGAATTTGCAGAGGGACAAGGTGTGCCTATTGCACCAGGAGTCCCAGCTACTGAAGCTAAGGGGTACTGGTACAGACACAACCGACGTTCCTTTAAAACAGCCGATGGCAACCAGCGTCAATTGCTACCACGATGGTATTTTTACTATCTTGGAACAGGACCGCATGCCAAAGACCAGTATGGCACCGACATTGACGGAGTCTACTGGGTCGCTAGTAACCAGGCTGATGTCAATACCCCGGCTGACATTCTCGATCGGGACCCAAGTAGCGATGAGGCTATTCCGACTAGGTTTCCGCCTGGCACGGTACTCCCTCAGGGTTACTATATTGAAGGCTCAGGAAGGTCTGCTCCTAATTCCAGATCTACTTCACGCGCATCCAGTAGAGCCTCTAGTGCAGGATCGCGCAGTAGAGCCAATTCTGGCAATAGAACCCCTACCTCTGGTGTAACACCTGATATGGCTGATCAAATTGCTAGTCTTGTTCTGGCTAAACTTGGCAAGGATGCCGCTAAGCCACAGCAAGTAACTAAGCAGACTGCCAAAGAAATCAGACAGAAAATTTTGAATAAACCCCGCCAGAAGAGGAGCCCCAATAAACAATGCACTGTTCAGCAGTGTTTTGGGAAGAGAGGCCCCAATCAGAATTTTGGTGGTGGAGAAATGTTAAAACTTGGAACTAGTGATCCACAGTTCCCCATTCTTGCAGAACTCGCACCCACAGCTGGTGCGTTTTTCTTTGGATCAAGATTAGAGTTGGCCAAAGTGCAGAATTTGTCTGGGAATCTTGACGAGCCCCAGAAGGATGTTTATGAATTGCGCTATAATGGCGCAATTAGATTTGATAGTACACTTTCAGGTTTTGAGACCATAATGAAGGTGTTGAATGAGAATTTGAATGCATACCAACAACAGGATGGTACGATGAATATGAGTCCAAAACCACAGCGTCAGCGTGGTCAGAAGAACGGACAAGGAGAAAATGATAATATAAGTGTTGCAGCGCCCAAAAGCCGTGTGCAGCAAAATAAGATTAGAGAGTTGACTGCAGAGGACATCAGCCTTCTTAAGAAGATGGATGAGCCCTTTACTGAAGACACCTCAGAAATA
>gi|15081544|ref|NC_003045.1|_Bovine_coronavirus_complete_genome
ATGTCGAAGATCAACAAATACGGTCTCGAACTACACTGGGCTCCAGAATTTCCATGGATGTTTGAGGACGCAGAGGAGAAGTTGGACAACCCTAGTAGTTCAGAGGTGGATATAGTATGCTCCACCACTGCGCAAAAGCTGGAAACAGGCGGAATTTGTCCTGAAAATCATGTGATGGTGGATTGTCGCCGACTTCTTAAACAAGAATGTTGTGTGCAGTCTAGCCTAATACGTGAAATTGTTATGAATACACGTCCATATGATTTGGAGGTGCTACTTCAAGATGCTTTGCAGTCCCGCGAAGCAGTTTTGGTTACACCCCCTCTAGGTATGTCTCTGGAGGCATGCTATGTGAGAGGTTGTAATCCTAATGGATGGACCATGGGTTTGTTTCGGCGTAGAAGTGTGTGTAACACTGGTCGCTGCGCTGTTAACAAGCATGTGGCCTATCAGCTATATATGATTGACCCTGCGGGTGTCTGTTTTGGTGCAGGTCAATTTGTGGGTTGGGTTATACCCTTAGCCTTTATGCCTGTGCAATCCCGGAAATTTATTGTTCCTTGGGTTATGTACTTGCGTAAGTGTGGCGAAAAGGGTGCCTACAACAAAGATCATAAACGTGGCGGTTTTGAACACGTTTATAATTTTAAAGTTGAGGATGCTTACGACTTGGTTCATGATGAGCCTAAGGGTAAGTTTTCTAAGAAGGCTTATGCTTTAATTAGAGGATACCGTGGTGTTAAACCGCTTCTTTATGTAGACCAGTATGGTTGTGATTATACTGGTGGTCTTGCAGATGGCTTAGAGGCTTATGCTGATAAGACATTGCAAGAAATGAAGGCATTATTTCCTATTTGGAGCCAGGAACTCCCTTTTGATGTAACTGTGGCATGGCACGTTGTGCGTGATCCACGTTATGTTATGAGACTGCAAAGTGCTTCTACTATACGTAGTGTTGCATATGTTGCTAACCCTACTGAAGACTTGTGTGATGGTTCTGTTGTTATAAAGGAACCTGTGCATGTTTATGCGGATGACTCTATTATTTTACGTCAACATAATTTAGTTGACATTATGAGTTGTTTTTATATGGAGGCAGATGCAGTTGTAAATGCTTTTTATGGTGTTGATTTGAAAGATTGTGGTTTTGTTATGCAGTTTGGTTATATTGACTGCGAACAAGACTTGTGTGATTTTAAAGGTTGGGTTCCTGGTAATATGATAGATGGTTTTGCTTGCACTACTTGTGGTCATGTCTATGAGACAGGTGATTTGCTAGCACAATCTTCAGGTGTTCTGCCTGTTAATCCTGTATTGCATACTAAGAGTGCAGCAGGTTATGGTGGTTTTGGTTGTAAGGATTCTTTTACCCTGTATGGCCAAACTGTAGTTTATTTTGGAGGTTGTGTGTATTGGAGTCCAGCACGTAATATATGGATTCCTATATTAAAATCTTCTGTTAAGTCTTATGACGGTTTGGTTTATACTGGAGTTGTAGGTTGCAAGGCTATTGTAAAGGAAACAAATCTCATTTGCAAAGCGTTGTACCTTGATTATGTTCAACACAAGTGTGGCAATTTACACCAGCGGGAGTTGCTAGGTGTGTCAGATGTGTGGCATAAACAATTGTTATTAAATAGAGGTGTGTACAAACCTCTTTTAGAGAATATTGATTATTTTAATATGCGGCGCGCTAAATTTAGTTTAGAAACTTTTACTGTTTGTGCAGATGGTTTTATGCCTTTTCTTTTAGATGATTTGGTTCCGCGCGCATATTATTTGGCAGTAAGTGGTCAAGCATTTTGTGACTACGCAGATAAAATCTGCCATGCTGTTGTGTCTAAGAGTAAAGAGTTACTTGATGTGTCTCTGGATTCTTTAAGTGCAGCTATACATTATTTGAATTCTAAAATTGTTGATTTGGCTCAACATTTTAGTGATTTTGGAACAAGTTTTGTTTCTAAAATTGTTCATTTCTTTAAGACTTTTACTACTAGCACTGCTCTTGCATTTGCATGGGTTTTATTTCATGTTTTGCATGGTGCTTATATAGTAGTAGAGAGTGATATATATTTTGTTAAAAACATTCCTCGTTATGCTAGTGCTGTTGCACAAGCATTTCGGAGTGTTGCTAAAGTTGTACTGGACTCTTTAAGAGTTACTTTTATTGATGGCCTTTCTTGTTTTAAGATTGGACGTAGAAGAATTTGTCTCTCAGGCAGTAAAATTTATGAAGTTGAGCGTGGCTTGTTACATTCATCTCAATTGCCATTAGATGTTTATGATTTAACCATGCCTAGTCAAGTTCAGAAAGCCAAGCAAAAACCTATTTATTTAAAAGGTTCTGGTTCTGATTTTTCATTAGCAGATAGTGTGGTTGAAGTTGTTACAACTTCACTTACACCATGTGGTTATTCTGAACCACCTAAAGTTGCAGATAAAATTTGCATTGTGGATAATGTTTATATGGCCAAGGCTGGTGACAAATATTACCCTGTTGTGGTTGATGGTCATGTAGGACTCTTGGATCAAGCATGGAGGGTTCCTTGTGCTGGAAGGCGTGTTACATTTAAGGAACAGCCTACAGTAAATGAGATTGCAAGCACACCTAAGACTATTAAAGTTTTTTATGAGCTTGACAAAGATTTTAATACTATTTTAAACACTGCATGTGGAGTGTTTGAAGTAGATGATACCGTGGATATGGAGGAATTTTATGCTGTGGTGATTGATGCCATAGAAGAGAAACTTTCTCCATGTAAGGAGCTTGAAGGTGTAGGTGCTAAAGTTAGTGCCTTTTTACAGAAATTAGAGGATAATTCCCTATTTTTATTTGATGAGGCTGGCGAGGAAGTTCTTGCTTCTAAATTGTATTGTGCTTTTACAGCTCCTGAAGATGATGACTTTCTTGAAGAAAGTGGTGTTGAAGAAGATGATGTAGAAGGTGAGGAAACTGATTTAACTGTCACAAGTGCTGGAGAGCCTTGTGTTGCCAGTGAACAGGAGGAGTCTTCTGAAATCTTAGAGGACACTTTGGATGATGGTCCATGTGTGGAGACATCTGATTCACAAGTTGAAGAAGATGTAGAAATGTCGGATTTTGCTGATCTTGAATCTGTGATTCAGGATTATGAAAATGTTTGTTTTGAGTTTTATACTACAGAGCCAGAATTTGTTAAAGTTTTGGATCTGTATGTGCCTAAAGCAACTCGCAACAATTGCTGGTTGCGATCAGTTTTGGCAGTGATGCAGAAACTGCCCTGTCAATTTAAAGATAAAAATTTGCAGGATCTTTGGGTGTTATATAAGCAACAGTATAGTCAGTTGTTTGTTGATACCTTGGTTAATAAGATACCTGCTAATATTGTAGTTCCACAAGGTGGTTATGTTGCCGATTTTGCATATTGGTTCTTAACCTTATGTGATTGGCAGTGTGTTGCATACTGGAAATGCATTAAATGTGATTTAGCTCTTAAGCTTAAAGGCTTGGATGCTATGTTCTTTTATGGTGATGTTGTCTCACATGTGTGCAAGTGTGGTGAGTCTATGGTACTTATTGATGTTGATGTGCCATTTACAGCCCACTTTGCTCTTAAAGATAAGTTGTTTTGTGCATTTATTACTAAGCGTAGTGTGTATAAAGCAGCTTGTGTTGTGGATGTTAATGATAGTCATTCTATGGCTGTTGTTGATGGTAAACAAATTGATGATCATCGTGTCACTAGTATTACTAGTGATAAGTTTGATTTTATTATTGGGCATGGTATGTCATTTTCAATGACTACTTTCGAAATTGCCCAATTGTATGGTTCTTGTATAACACCTAATGTATGTTTTGTTAAAGGTGATATAATTAAAGTTTCTAAGCGTGTTAAAGCAGAAGTCGTTGTAAATCCTGCTAATGGCCATATGGCACATGGTGGTGGTGTTGCAAAGGCTATTGCAGTAGCAGCTGGACAGCAGTTTGTTAAAGAGACTACCGATATGGTTAAGTCTAAAGGAGTTTGTGCTACTGGAGACTGTTATGTCTCTACAGGGGGTAAATTATGTAAAACTGTGCTTAATGTTGTTGGACCTGATGCGAGAACACAGGGTAAACAAAGTTATGCATTGTTAGAGCGTGTTTATAAACATCTTAACAAATATGATTGTGTTGTTACAACTTTGATATCAGCTGGTATATTTAGTGTGCCGTCTGATGTGTCTTTAACATATCTACTTGGTACTGCCGAGAAACAAGTTGTTCTTGTTAGCAATAATCAAGAGGATTTTGATCTTATTTCTAAGTGTCAGATAACTGCCGTTGAGGGCACTAAGAAATTGGCAGAGCGTCTTTCTTTTAATGTAGGGCGTTCTATCGTTTACGAAACAGATGCTAATAAGTTGATTTTAAGCAATGACGTTGCATTTGTTTCGACATTTAATGTCTTACAGGATGTTTTATCCTTAAGACATGATATAGCACTTGATGATGATGCACGAACCTTTGTTCAGAGCAATGTTGATGTTGTACCTGAGGGTTGGCGTGTTGTCAATAAGTTTTATCAAATTAATGGTGTTAGAACCGTTAAGTATTTTGAGTGTCCCGGTGGCATAGATATATGCAGCCAGGATAAAGTTTTTGGTTATGTACAGCAGGGTAGTTTTAATAAGGCTACTGTTGCTCAAATTAAAGCCTTGTTTTTGGATAAAGTGGACATCTTGCTAACTGTTGATGGTGTCAATTTCACTAACAGGTTTGTGCCTGTAGGTGAAAGTTTTGGTAAGAGTCTAGGAAATGTGTTCTGTGATGGAGTTAATGTCACGAAACATAAGTGTGATATAAATTATAAAGGTAAAGTCTTTTTCCAGTTTGATAATCTTTCTAGTGAAGATTTAAAGGCTGTAAGAAGTTCTTTTAATTTTGATCAGAAGGAATTGCTTGCCTACTACAACATGCTTGTTAATTGTTCTAAATGGCAGGTTGTTTTTAATGGTAAGTATTTCACTTTTAAGCAAGCTAATAACAATTGTTTTGTTAATGTTTCTTGCTTAATGCTCCAGAGTTTGAATCTGAAATTTAAAATTGTTCAATGGCAGGAGGCGTGGCTTGAATTTCGTTCTGGCCGCCCTGCTAGATTTGTATCTTTGGTTTTAGCCAAAGGTGGGTTTAAATTTGGTGATCCTGCTGACTCTAGAGATTTCTTGCGTGTTGTGTTTAGTCAAGTTGATTTGACAGGGGCAATATGTGATTTTGAAATTGCATGTAAATGTGGTGTAAAGCAGGAACAGCGTACTGGTGTGGACGCTGTTATGCATTTTGGTACATTGAGTCGTGAAGATCTTGAGATTGGTTACACCGTGGATTGTTCTTGCGGTAAAAAGCTAATCCATTGTGTACGATTTGATGTACCATTTTTAATTTGTAGTAATACACCTGCTAGTGTAAAATTACCTAAGGGTGTAGGAAGTGCAAATATTTTTAAAGGTGATAAGGTTGGTCATTATGTTCATGTTAAGTGTGAACAGTCTTATCAGCTTTATGATGCTTCTAATGTTAAGAAGGTTACAGACGTTACTGGCAATTTGTCAGATTGTTTGTATCTTAAAAATTTGAAACAAACTTTTAAATCGGTGTTAACCACCTATTATTTGGATGATGTTAAGAAAATTGAGTATAACCCTGACTTGTCACAATATTATTGTGACGGAGGTAAGTATTATACTCAGCGTATTATTAAAGCCCAATTTAAAACATTTGAGAAAGTAGATGGTGTGTATACTAATTTTAAATTGATAGGACACACCATCTGTGATATTCTTAATGCTAAGTTGGGTTTTGATAGCTCTAAAGAGTTTGTTGAATATAAAGTTACTGAGTGGCCAACAGCTACAGGTGATGTGGTGTTGGCTACTGATGATTTGTATGTTAAGAGATACGAAAGGGGTTGTATTACTTTTGGTAAACCTGTTATATGGTTAAGCCATGAGCAAGCTTCCCTCAATTCTTTAACATATTTTAATAGACCTTTATTGGTTGATGAGAATAAATTTGATGTTTTAAAAGTGGATGATGTTGACGATGGTGGTGATATCTCAGAGAGTGATGCCAAAGAATCCAAAGAAATCAACATTATTAAGTTAAGTGGTGTTAAAAAACCATTTAAGGTTGAAGATAGTGTCATAGTTAATGATGATACTAGTGAAATCAAATATGTTAAGAGTTTGTCTATAGTTGATGTGTATGATATGTGGCTTACAGGTTGTAGGTATGTTGTTAGAACTGCTAATGCTTTGAGCATGGCAGTTAACGTACCTACAATACGTAAGTTTATAAAATTTGGTATGACTCTTGTTAGTATACCAATTGATTTGTTAAATTTAAGAGAGATTAAGCCTGTTTTTAATGTGGTTAAAGCTGTGCGAAATAAAATTTCTGCATGCTTTAATTTTATTAAATGGCTTTTTGTCTTATTATTTGGCTGGATTAAAATATCCGCTGATAATAAAGTAATTTACACCACAGAAGTTGCATCAAAGCTTACATGTAAGCTTGTAGCTTTAGCTTTTAAAAATGCGTTTTTGACATTTAAGTGGAGTGTGGTTGCTAGAGGTGCTTGCATTATAGCGACTATATTTCTATTGTGGTTTAATTTTATATATGCCAATGTAATTTTTAGTGATTTTTATTTGCCTAAAATTGGTTTCTTGCCGACTTTTGTTGGTAAGATCGCACAGTGGATTAAGAGCACTTTTAGTCTTGTAACTATTTGTGATCTATATTCCATTCAGGATGTGGGTTTTAAGAATCAGTATTGTAATGGAAGTATCGCATGTCAATTCTGCTTGGCAGGATTTGATATGTTAGATAATTATAAAGCCATTGATGTAGTACAGTATGAAGCTGATAGGAGAGCATTTGTTGATTATACAGGTGTGTTAAAGATTGTCATTGAATTGATAGTTAGTTACGCCCTGTATACGGCATGGTTCTACCCATTGTTTGCTCTTATTAGTATTCAGATCTTGACCACTTGGCTGCCTGAGCTTTTTATGCTTAGTACATTACATTGGAGTGTTAGGTTGCTGGTGTCTTTAGCTAATATGTTACCAGCACATGTGTTTATGAGGTTTTATATTATTATTGCCTCTTTTATTAAGCTGTTTATCTTGTTTAGGCATGTTGCCTATGGTTGTAGTAAACCTGGTTGTTTGTTTTGTTACAAGAGGAATCGTAGTCTACGTGTTAAATGTAGTACTATTGTTGGTGGCATGATACGCTATTACGATGTTATGGCTAATGGTGGCACTGGCTTTTGTTCAAAACATCAATGGAATTGCATTGATTGTGATTCTTATAAACCAGGTAATACTTTTATTACTGTTGAGGCCGCTCTTGATTTATCTAAGGAATTGAAACGGCCTATTCAGCCTACAGATGTTGCTTATCATACGGTTACGGATGTTAAGCAAGTTGGTTGTTATATGCGCTTGTTCTATGAGCGTGATGGACAGCGCACATATGATGATGTTAATGCTAGTTTGTTTGTGGATTATAGTAATTTGCTACATTCTAAGGTTAAGGGTGTGCCTAATATGCATGTTGTGGTAGTGGAAAATGATGCCGATAAAGCTAATTTTCTTAATGCTGCTGTATTTTATGCACAGTCTTTGTTTAGACCTATTTTAATGGTTGATAAAAATCTGATAACTACTGCTAATACTGGTACGTCTGTTACAGAAACTATGTTTGATGTTTATGTGGACACATTTTTGTCTATGTTTGATGTGGATAAAAAGAGTCTTAATGCTTTAATAGCAACTGCGCATTCTTCTATAAAACAGGGTACGCAGATTTGTAAAGTTTTGGATACCTTTTTAAGCTGTGCTCGTAAAAGTTGTTCTATTGATTCAGATGTTGATACTAAGTGTTTAGCTGATTCTGTCATGTCTGCTGTATCGGCAGGCCTTGAATTGACGGATGAAAGTTGTAATAACTTGGTGCCAACATATTTGAAGGGTGATAACATTGTGGCAGCTGATTTAGGTGTTCTGATTCAAAATTCTGCTAAGCATGTGCAGGGTAATGTTGCTAAAATAGCCGGTGTTTCCTGTATATGGTCTGTGGATGCTTTTAATCAGCTAAGTTCTGATTTCCAGCATAAATTGAAGAAAGCATGTTGTAAAACTGGTTTGAAATTGAAGCTTACTTATAATAAGCAGATGGCTAATGTCTCTGTTTTAACTACACCCTTTAGTCTTAAAGGGGGTGCAGTTTTTAGTTATTTTGTTTATGTATGTTTTCTGTTGAGTTTGGTTTGTTTTATTGGATTGTGGTGCTTAATGCCCACTTACACAGTACACAAATCAGATTTTCAGCTTCCCGTTTATGCCAGTTATAAAGTTTTAGATAATGGTGTTATTAGAGATGTTAGCGTTGAAGATGTTTGTTTCGCTAACAAATTTGAACAATTTGATCAATGGTATGAGTCTACATTTGGTCTAAGTTATTATAGTAACAGTATGGCTTGTCCCATTGTTGTTGCTGTAGTAGACCAGGATCTTGGCTCTACTGTGTTTAATGTCCCTACCAAAGTGTTACGATATGGTTACCATGTGTTGCACTTTATTACACATGCACTTTCTGCTGATGGAGTGCAGTGTTATACGCCACATAGTCAAATATCGTATTCTAATTTTTATGCTAGTGGCTGTGTGCTTTCCTCCGCTTGTACTATGTTTGCAATGGCCGATGGTAGTCCACAACCTTATTGTTATACAGAGGGGCTTATGCAGAATGCTTCTCTGTATAGTTCATTGGTACCTCACGTGCGGTATAATCTTGCTAATGCTAAAGGTTTTATCCGTTTTCCAGAAGTGTTGCGAGAAGGACTTGTGCGTATTGTGCGTACTCGTTCTATGTCGTATTGCAGAGTTGGATTATGTGAGGAAGCTGATGAGGGTATATGCTTTAACTTTAATGGTTCTTGGGTGCTTAATAATGATTATTATAGATCATTGCCTGGGACCTTTTGTGGTAGAGATGTTTTTGACTTAATTTATCAGCTTTTTAAAGGTTTAGCACAGCCTGTGGATTTCTTGGCATTGACTGCTAGTTCTATTGCTGGTGCTATACTTGCTGTAATTGTTGTTTTGGTGTTTTATTACTTAATAAAGCTTAAACGTGCTTTTGGTGATTACACCAGTATTGTTTTTGTCAATGTGATTGTGTGGTGTGTAAATTTTATGATGCTTTTTGTGTTTCAAGTTTACCCTACACTTTCTTGTGTATATGCTATTTGTTATTTTTATGCCACGCTTTATTTCCCTTCGGAGATAAGTGTGATAATGCATTTACAATGGCTAGTTATGTATGGCACTATTATGCCTTTATGGTTTTGTTTGCTATATATATCTGTTGTTGTTTCAAATCATGCTTTTTGGGTATTCGCTTACTGCAGACGGCTTGGTACTTCTGTTCGTAGTGATGGTACATTTGAAGAAATGGCTCTTACTACTTTTATGATTACAAAAGATTCTTATTGTAAGCTTAAGAATTCTTTGTCTGATGTTGCTTTTAATAGATATTTGAGTTTGTATAATAAATATAGGTATTACAGCGGTAAAATGGATACTGCTGCATATAGGGAGGCTGCTTGTTCGCAGTTGGCTAAAGCAATGGATACATTTACCAATAATAATGGTAGTGATGTGCTTTACCAACCACCTACTGCTTCCGTTTCAACTTCATTCTTGCAATCTGGTATTGTGAAAATGGTTAATCCTACTTCTAAGGTAGAACCATGTATTGTCAGTGTTACCTATGGTAATATGACATTGAATGGTTTATGGTTGGATGATAAGGTCTACTGTCCCAGACATGTGATATGTTCTGCTTCAGATATGACTAATCCAGATTATACAAATTTGTTGTGTAGAGTAACATCAAGTGATTTTACTGTATTGTTTGATCGTTTAAGCCTTACAGTGATGTCTTATCAAATGCAGGGTTGTATGCTTGTTCTTACAGTGACCCTGCAAAATTCTCGTACGCCAAAATATACATTTGGTGTGGTTAAACCTGGTGAGACTTTTACTGTTTTAGCTGCTTATAACGGCAAACCACAAGGAGCCTTTCATGTGACTATGCGTAGTAGTTATACCATTAAGGGTTCCTTTTTATGCGGATCTTGTGGGTCTGTTGGTTATGTGCTAATGGGTGATTGTGTTAAATTTGTGTATATGCATCAATTGGAGCTTAGTACTGGTTGTCATACTGGTACTGATTTCAATGGGGATTTTTATGGTCCTTATAAGGATGCTCAGGTTGTCCAATTGCCCGTTCAGGATTATATACAATCTGTTAATTTTGTAGCATGGCTTTATGCTGCTATACTTAATAATTGTAATTGGTTTGTACAAAGTGATAAGTGTTCTGTTGAAGATTTTAATGTGTGGGCTTTGTCTAATGGGTTTAGCCAAGTTAAATCTGATCTTGTTATAGATGCTTTAGCTTCTATGACTGGTGTGTCTTTGGAAACATTATTGGCTGCTATTAAGCGTCTCAAGAATGGTTTTCAAGGACGTCAGATTATGGGTAGTTGCTCCTTTGAGGATGAATTGACACCTAGCGATGTTTATCAACAACTCGCTGGTATCAAGTTACAATCAAAGCGTACTAGATTGGTTAAAGGCATTGTTTGTTGGATTATGGCTTCTACATTTTTGTTTAGTTGTATAATTACAGCATTTGTGAAATGGACTATGTTTATGTATGTAACTACTAATATGCTTAGTATTACGTTTTGTGCACTTTGTGTTATAAGTTTGGCCATGTTGTTGGTTAAACATAAGCATCTTTATTTGACTATGTATATAATTCCTGTGCTTTTTACACTGCTGTATAACAACTATTTGGTTGTGTACAAGCAGACATTTAGAGGCTATGTTTATGCATGGCTATCATATTATGTTCCATCAGTTGAGTATACTTATACTGATGAAGTTATTTACGGCATGTTATTGCTTATAGGAATGGTCTTTGTTACATTACGTAGCATTAACCATGATTTGTTTTCTTTTATAATGTTTGTTGGTCGTGTGATTTCTGTTGTCTCTTTGTGGTACATGGGTTCTAACTTAGAGGAAGAAATTCTTCTTATGTTGGCTTCTCTTTTTGGTACTTACACATGGACAACAGCTTTATCTATGGCTGCAGCAAAGGTTATTGCTAAGTGGGTTGCTGTGAATGTTTTGTATTTCACAGATATACCTCAAATTAAGATAGTTCTTGTATGCTATTTGTTTATAGGTTATATTATTAGCTGTTATTGGGGTTTGTTTTCCTTGATGAACAGTTTGTTTAGAATGCCTTTGGGTGTTTATAATTATAAAATTTCAGTACAGGAATTAAGATATATGAATGCTAATGGATTGCGCCCTCCTAAGAATAGTTTTGAAGCCCTTATGCTTAATTTTAAGCTTTTGGGTATTGGAGGTGTGCCAATTATTGAAGTATCTCAATTTCAATCAAAATTGACTGATGTTAAATGTGCTAATGTTGTCTTGCTTAATTGCTTGCAACATTTGCATGTTGCTTCTAATTCTAAGTTGTGGCAGTATTGTAGCACTTTGCACAATGAAATACTTGCCACTTCTGATCTGGGTGTTGCTTTTGAAAAGCTTGCTCAGTTGTTAATTGTTTTGTTTGCTAATCCAGCTGCTGTGGATAGCAAGTGCCTGACTAGTATTGAAGAAGTTTGCGATGATTACGCAAAGGACAATACTGTTTTGCAGGCTTTACAGAGTGAATTTGTTAATATGGCTAGCTTCGTTGAATATGAAGTTGCTAAGAAAAATCTTGATGAGGCGCGTTCTAGTGGTTCTGCTAATCAACAGCAGTTAAAACAGCTAGAGAAAGCCTGTAATATTGCTAAATCTGCTTATGAACGCGACCGTGCTGTAGCAAGAAAGTTGGAGCGTATGGCAGATTTGGCTCTCACTAATATGTATAAAGAAGCTAGAATTAATGATAAGAAGAGTAAGGTTGTTTCTGCCTTGCAAACTATGCTTTTTAGTATGGTGCGTAAGTTAGATAATCAAGCTCTGAATTCAATATTAGATAATGCTGTGAAGGGTTGTGTACCATTGAATGCAATCCCTTCATTGGCTGCAAATACTCTGACTATAATTGTACCAGATAAAAGTGTTTACGATCAGGTAGTTGACAATGTCTATGTTACCTATGCGGGTAATGTATGGCAGATTCAAACTATCCAAGATTCAGATGGTACAAATAAGCAGTTGAATGAGATATCTGATGATTGTAACTGGCCACTAGTTATTATTGCAAATCGGCATAATGAGGTATCTGCAACCGTTTTGCAAAATAATGAATTAATGCCTGCTAAGTTGAAAACTCAGGTCGTTAATAGTGGTCCAGATCAGACTTGTAACACACCTACTCAATGTTACTATAATAATAGTAACAATGGGAAGATTGTTTATGCTATACTTAGTGATGTTGATGGTCTTAAGTATACAAAGATTCTTAAAGATGATGGCAATTTTGTTGTTTTGGAGTTAGATCCTCCTTGTAAATTTACTGTTCAAGATGTTAAAGGTCTTAAAATTAAGTACCTTTATTTTGTAAAAGGTTGTAACACACTAGCAAGAGGCTGGGTTGTTGGTACAATTTCTTCTACAGTTAGATTGCAAGCTGGAACTGCTACTGAGTATGCTTCCAACTCATCTATATTATCTTTATGTGCGTTTTCTGTAGATCCTAAGAAAACGTATTTAGATTTTATACAGCAGGGAGGAACACCTATTGCCAATTGTGTTAAAATGTTGTGTGACCATGCTGGTACCGGTATGGCCATTACTGTTAAACCCGATGCTACCACTAATCAGGATTCATATGGTGGTGCGTCTGTTTGTATATATTGCCGCGCACGAGTTGAACACCCAGATGTTGATGGGTTGTGCAAATTACGCGGCAAGTTTGTACAAGTGCCTGTAGGTATAAAAGATCCTGTGTCTTATGTTTTGACACATGATGTTTGTCAAGTTTGTGGATTTTGGCGGGATGGAAGTTGTTCATGTGTTAGCACTGACACTACTGTTCAGTCAAAAGATACTAATTTTTTAAACCGGGGTACGAGTGTAGATGCCCGTCTCGTACCCTGTGCCAGTGGTTTATCTACTGATGTACAATTAAGGGCATTTGATATTTGCAATGCTAGTGTTGCTGGCATTGGTTTACATTTAAAAGTTAATTGCTGCCGTTTTCAGCGTGTTGATGAGAACGGTGATAAATTAGATCAGTTCTTTGTTGTTAAGAGGACAGATCTGACTATATATAATAGAGAGATGGAATGCTATGAGCGTGTAAAAGATTGTAAGTTTGTGGCTGAACACGATTTCTTTACATTTGATGTAGAAGGTAGTCGTGTGCCACATATTGTACGCAAGGATTTAACAAAGTATACTATGTTGGATCTTTGCTATGCGTTGCGACATTTTGATCGCAATGATTGCATGCTGCTTTGTGACATTCTCTCTATATATGCTGGTTGTGAACAATCCTACTTTACTAAGAAGGATTGGTATGATTTTGTTGAAAATCCTGATATTATTAATGTTTATAAAAAGCTAGGACCTATTTTTAATAGAGCCCTAGTTAGCGCTACTGAGTTTGCAGACAAATTGGTGGAGGTAGGCTTAGTAGGCATTTTAACACTTGATAACCAAGATTTAAATGGTAAATGGTATGATTTTGGTGACTATGTTATTGCAGCCCCAGGTTGTGGTGTTGCTATAGCAGACTCTTATTATTCTTATATGATGCCTATGCTGACCATGTGTCATGCATTGGATTGTGAATTGTATGTGAATAATGCTTATAGACTATTTGATCTTGTACAGTATGATTTTACTGATTACAAGCTCGAATTGTTTAATAAGTATTTTAAGCACTGGAGTATGCCATACCATCCTAACACGGTTGATTGTCAGGATGATCGGTGTATCATACATTGTGCTAATTTTAACATACTTTTTAGTATGGTTTTACCTAATACATGTTTTGGGCCTCTTGTTAGGCAAATTTTTGTGGATGGTGTTCCTTTTGTTGTTTCAATTGGATACCATTATAAAGAACTTGGTATTGTGATGAATATGGATGTGGATACACATCGTTATCGCTTGTCTTTAAAAGACTTGCTTTTATATGCTGCTGATCCAGCTTTGCATGTAGCTTCTGCTAGTGCATTGTATGATTTACGCACTTGCTGTTTTAGTGTTGCGGCTATAACAAGCGGTGTAAAATTTCAAACAGTTAAACCTGGTAATTTTAATCAGGATTTTTATGATTTTATTTTAAGTAAGGGCCTGCTTAAAGAGGGTAGTTCAGTTGATCTGAAGCACTTTTTCTTTACGCAGGATGGTAATGCTGCTATCACTGATTATAATTATTATAAGTACAATTTGCCCACCATGGTGGACATTAAGCAGTTGTTGTTTGTTTTGGAAGTTGTTTATAAGTATTTTGAGATTTATGATGGTGGGTGTATACCGGCATCACAAGTCATTGTTAATAATTATGATAAGAGTGCTGGCTATCCATTTAATAAATTTGGAAAAGCCAGGCTCTATTATGAAGCATTATCATTTGAGGAGCAGGATGAAATTTACGCCTATACTAAGCGCAATGTCCTGCCAACACTTACTCAAATGAATTTGAAATATGCTATTAGTGCTAAGAATAGAGCCCGCACTGTCGCTGGTGTTTCCATACTTAGTACTATGACTGGCAGAATGTTTCATCAAAAGTGTTTGAAAAGTATAGCAGCTACACGTGGTGTTCCTGTTGTTATAGGCACCACTAAATTTTATGGCGGCTGGGATGATATGTTACGTCGCCTTATTAAAGATGTTGATAATCCTGTACTTATGGGTTGGGATTATCCTAAGTGTGATCGTGCTATGCCAAACATACTACGTATTGTTAGTAGTCTGGTTTTGGCTCGAAAACATGAGGCATGTTGTTCGCAAAGCGATAGGTTTTATCGACTTGCGAATGAATGCGCACAAGTTCTGAGTGAAATTGTTATGTGTGGTGGCTGTTATTATGTTAAGCCTGGTGGCACTAGTAGTGGTGATGCAACTACTGCTTTTGCTAATTCAGTTTTTAACATATGTCAAGCTGTTTCAGCCAATGTATGTGCTTTAATGTCATGCAATGGTAATAAGATTGAAGATTTGAGTATACGTGCTCTTCAGAAGCGCTTATACTCACATGTGTATAGAAGTGATATGGTTGATTCAACCTTTGTCACAGAATATTATGAATTTTTAAATAAGCATTTTAGTATGATGATTTTGAGTGATGATGGCGTTGTGTGTTATAATTCTGACTATGCGTCCAAAGGGTATATTGCTAATATAAGTGCCTTTCAACAGGTATTGTATTATCAAAATAACGTTTTTATGTCAGAATCCAAATGTTGGGTTGAAAATGACATAAATAATGGACCTCATGAATTCTGTTCACAACACACAATGCTTGTAAAGATGGATGGGGACGATGTCTATCTTCCATATCCTGATCCTAGTCGTATATTAGGAGCTGGATGTTTTGTAGATGATTTGTTAAAGACTGATAGTGTTCTTTTAATAGAACGATTTGTAAGTCTTGCAATAGATGCTTATCCACTTGTGTACCACGAAAATGAAGAATACCAAAAGGTTTTTCGTGTTTATTTGGAGTATATAAAGAAGTTGTACAATGACCTGGGTAATCAGATCTTGGATAGCTACAGTGTTATTTTAAGTACTTGTGATGGACAAAAGTTTACTGATGAGTCCTTTTACAAGAACATGTATTTAAGAAGTGCAGTTATGCAGAGTGTTGGAGCTTGCGTGGTCTGCTCTTCTCAAACATCATTACGTTGTGGCAGTTGCATCAGAAAGCCTCTTCTTTGCTGCAAGTGTTGTTACGATCATGTTATGGCAACTGATCATAAATATGTTTTGAGTGTTTCACCATATGTGTGTAATGCACCAGGATGTGATGTAAATGATGTTACCAAATTGTATCTAGGTGGTATGTCATATTATTGTGAAGATCATAAGCCACAATATTCGTTTAAGTTGGTAATGAATGGTATGGTTTTTGGTCTATATAAACAATCTTGTACAGGATCTCCGTACATAGATGATTTTAATCGTATAGCTAGTTGTAAATGGACTGATGTTGATGATTACATACTGGCTAATGAATGTACAGAGCGCTTGAAATTGTTTGCTGCAGAAACGCAAAAGGCGACTGAGGAAGCCTTTAAGCAGAGTTATGCATCAGCAACAATACAAGAGATTGTTAGCGAGCGCGAATTGATCCTCTCTTGGGAGATTGGAAAAGTGAAGCCACCACTTAATAAAAATTATGTTTTTACTGGCTACCATTTTACTAAAAATGGCAAGACAGTTTTAGGTGAGTATGTTTTTGATAAGAGTGAGTTGACTAATGGTGTGTATTATCGCGCCACAACCACTTATAAGCTATCTGTTGGAGATGTTTTTGTTTTAACCTCTCATTCAGTAGCTAATTTAAGTGCTCCTACGCTGGTGCCGCAGGAGAATTATAGTAGTATTAGATTCGCTAGTGTTTATAGTGTGCTTGAGACGTTTCAGAACAATGTCGTTAATTATCAACACATTGGTATGAAACGTTATTGCACCGTGCAAGGACCTCCTGGTACAGGAAAGTCACATCTTGCTATTGGTCTTGCTGTTTATTATTGTACAGCACGTGTAGTATACACTGCGGCCAGCCATGCAGCTGTTGACGCATTGTGTGAAAAAGCATACAAATTTTTGAATATAAATGACTGCACTCGTATTGTTCCTGCCAAGGTCAGGGTGGAGTGCTATGATAAGTTTAAAATTAATGACACCACTCGTAAGTATGTGTTTACTACTATAAATGCATTACCTGAGATGGTGACTGATATTGTTGTTGTAGATGAAGTTAGTATGCTTACCAATTATGAGCTTTCTGTTATTAATGCTCGTATTCGTGCTAAGCATTATGTTTACATTGGTGATCCTGCTCAATTGCCAGCACCACGTGTGTTATTGAGCAAGGGTACACTTGAACCTAAATATTTTAACACTGTTACTAAGCTTATGTGTTGCTTAGGGCCAGACATTTTTCTTGGTACATGTTATAGATGTCCTAAGGAAATTGTTGATACAGTGTCTGCCTTGGTTTATGAAAATAAGCTTAAGGCTAAGAATGAAAGTAGTTCATTGTGTTTTAAGGTCTATTATAAAGGCGTTACAACACATGAAAGTTCTAGTGCTGTAAATATGCAGCAGATTTATTTGATTAATAAGTTTTTGAAGGCTAACCCTTTGTGGCATAAAGCCGTTTTTATTAGCCCATATAATAGCCAGAACTTTGCAGCTAAGCGTGTTTTGGGTTTGCAAACCCAGACCGTGGATTCTGCTCAAGGTTCTGAATATGATTATGTTATATATTCACAGACTGCAGAAACAGCGCATTCTGTAAATGTTAATCGCTTCAATGTTGCTATTACTCGAGCCAAGAAAGGTATTCTTTGTGTTATGAGTAATATGCAGTTGTTTGAAGCATTACAGTTTACTACATTGACCTTAGATAAAGTGCCACAGGCCGTTGAAACGAGAGTTCAATGTAGTACCAATTTATTTAAAGATTGTAGCAAGAGTTATAGTGGTTACCACCCAGCTCACGCTCCTTCATTTTTGGCAGTAGATGACAAATATAAGGCAACTGGCGATTTAGCCGTGTGTCTTGGTATTGGAGATTCTGCTGTTACATATTCAAGATTAATATCACTCATGGGTTTTAAACTTGATGTCACCCTTGATGGGTATTGTAAGCTTTTTATAACTAAAGAAGAAGCTGTTAAACGCGTGCGTGCTTGGGTTGGCTTTGATGCTGAAGGCGCTCATGCCACGCGTGATAGCATTGGGACAAATTTCCCACTTCAATTAGGGTTTTCTACAGGAATTGATTTTGTTGTGGAAGCCACTGGTTTGTTTGCTGATAGAGATGGTTACAGCTTTAAAAAGGCTGTGGCTAAAGCTCCTCCTGGTGAACAATTTAAGCATCTCATCCCTTTGATGACGAGAGGTCAGCGCTGGGATGTTGTTAGACCTAGAATAGTACAAATGTTTGCAGATCATTTAATTGATCTGTCTGATTGTGTTGTGCTAGTTACATGGGCAGCCAACTTTGAGCTCACTTGTCTCCGATACTTTGCAAAAGTAGGTCGTGAGATCTCTTGTAATGTGTGCACTAAACGTGCCACAGCTTACAATTCTAGAACTGGTTACTATGGTTGTTGGCGCCATAGTGTTACATGTGATTACTTGTATAATCCACTTATTGTTGATATTCAACAGTGGGGATATATTGGATCTTTATCAAGTAATCATGATTTATATTGTAGTGTCCACAAAGGAGCACATGTTGCTTCATCTGATGCTATAATGACACGGTGTTTGGCCGTTTATGATTGTTTTTGCAATAATATTAATTGGAATGTGGAGTATCCCATTATTTCAAATGAGTTAAGTATTAATACCTCTTGTAGGGTCTTGCAGCGTGTTATGCTTAAAGCTGCAATGCTCTGCAACAGATATACTTTGTGTTATGATATTGGCAACCCAAAAGCGATTGCCTGTGTCAAAGATTTTGATTTTAAGTTCTATGATGCCCAACCAATTGTTAAGTCTGTCAAGACTCTTTTGTATTCTTTTGAGGCACATAAGGACTCTTTTAAAGATGGTTTGTGTATGTTTTGGAACTGTAATGTGGATAAGTATCCACCGAATGCAGTTGTATGTAGATTTGACACGAGAGTGTTGAATAATTTAAATCTTCCTGGCTGTAATGGAGGTAGTTTGTATGTTAATAAACATGCATTCCACACTAAACCCTTTTCTAGGGCAGCCTTTGAGCATTTGAAGCCTATGCCATTTTTCTATTATTCAGATACGCCTTGTGTGTATATGGATGGCATGGATGCTAAGCAGGTTGATTATGTACCTTTGAAATCCGCCACTTGCATCACAAGATGCAATTTAGGTGGTGCAGTTTGTTTAAAACATGCTGAAGAGTATCGTGAGTACCTAGAGTCTTACAATACAGCTACTACAGCAGGTTTTACTTTTTGGGTCTATAAGACATTTGATTTTTATAATTTGTGGAATACGTTCACCAAGCTACAAAGCTTGGAGAACGTTGTATATAATTTAGTCAAAACTGGTCATTATACAGGACAGGCTGGTGAAATGCCTTGTGCCATTATAAATGATAAAGTCGTGGCTAAGATCGATAAGGAGGATGTTGTCATTTTTATTAATAATACAACATACCCTACTAATGTTGCTGTTGAATTATTTGCCAAGCGCAGTATTCGACACCATCCAGAGCTTAAGCTCTTTAGAAATTTGAATATAGACGTGTGTTGGAAGCACGTCATTTGGGATTATGCTAGAGAAAGTATATTTTGCAGTAATACCTATGGTGTCTGCATGTATACAGATTTAAAGTTCATTGATAAATTGAATGTCCTTTTTGATGGTCGTGATAATGGTGCTCTTGAAGCTTTTAAACGCTCTAATAATGGCGTTTACATTTCCACGACAAAAGTTAAGAGTCTTTCGATGATAAAAGGTCCACCGCGTGCTGAATTAAATGGCGTAGTGGTGGACAAGGTTGGAGACACTGATTGTGTGTTTTATTTTGCTGTGCGTAAAGAGGGTCAGGATGTCATCTTCAGCCAATTCGACAGCCTGAGAGTCAGCTCTAACCAGAGCCCACAAGGTAATCTGGGGAGTAATGAACCCGGTAATGTCGGTGGTAATGATGCTCTGGCAACCTCCACTATCTTTACACAAAGCCGTGTTATTAGCTCTTTTACATGTCGTACTGATATGGAAAAAGATTTTATAGCTTTAGATCAAGACTTGTTTATTCAGAAGTATGGTTTGGAGGACTATGCCTTTGAACACATTGTTTATGGTAATTTCAACCAGAAGATTATTGGTGGTTTGCATTTGTTAATAGGCTTGTACCGAAGACAGCAAACTTCCAATCTGGTTATTCAGGAGTTTGTTTCATACGACTCCAGCATACACTCTTATTTTATCACTGATGAGAAGAGTGGTGGTAGTAAGAGTGTTTGCACTGTTATAGATATTTTGTTGGATGATTTTGTGGCTCTTGTTAAGTCACTTAATCTCAACTGTGTGAGTAAGGTTGTTAACGTTAATGTTGATTTTAAAGATTTTCAGTTCATGCTTTGGTGTAACGATGAGAAAGTTATGACTTTCTATCCTCGTTTGCAAGCTGCATCTGACTGGAAGCCTGGTTATTCTATGCCTGTATTATACAAGTATTTGAATTCCCCAATGGAAAGAGTTAGTCTCTGGAATTATGGGAAGCCGGTTACTTTGCCTACAGGCTGTATGATGAATGTTGCTAAGTATACTCAGTTATGTCAATATCTGAATACTACAACATTAGCTGTACCTGTTAATATGCGAGTTTTGCATTTAGGTGCAGGTTCAGAAAAAGGAGTAGCACCGGGTTCTGCAGTTCTTAGGCAGTGGTTGCCTGCTGGTACTATTCTTGTAGATAATGATTTATACCCATTTGTGAGTGACAGTGTCGCTACATATTTTGGGGATTGTATAACCTTACCCTTTGATTGTCAATGGGATTTGATAATTTCTGATATGTATGACCCTATTACTAAGAACATAGGGGAGTACAATGTAAGTAAAGATGGTTTCTTTACATACATTTGTCATATGATTCGCGACAAGTTAGCTCTGGGTGGCAGTGTTGCTATAAAAATAACAGAGTTTTCTTGGAATGCAGAATTATATAAGTTAATGGGGTATTTTGCATTTTGGACGGTTTTCTGCACAAATGCAAACGCTTCTTCTAGTGAAGGGTTTTTAATTGGCATAAATTATTTGGGTAAGCCCAAGGTTGAGATAGATGGAAATGTTATGCATGCCAATTATTTGTTTTGGAGAAATTCCACAGTTTGGAACGGGGGTGCTTATAGCCTGTTTGACATGGCTAAATTCCCGCTTAAGTTGGCTGGTACTGCCGTAATAAATTTAAGAGCAGACCAGATTAATGATATGGTTTATTCCCTTCTTGAAAAGGGTAAACTACTTGTTAGAGATACAAATAAAGAAGTTTTTGTTGGTGACAGTTTGGTTAATGTAATCATGGCAGTCGCTTATGCAGACAAGCCTAATCACTTTATCAATTTTCCACTTACCCAGTTTCAGGGCTTTGTGTTAAATTATAAAGGTTTACAATTTCAACTTCTCGATGAAGGAGTGGATTGTAAAATACAAACAGCGCCTCACATTAGTCTTGCTATGCTGGATATTCAGCCTGAAGACTACAGAAGTGTTGATGTTGCTATTCAAGAAGTTATTGATGATATGCATTGGGGTGAGGGCTTTCAGATTAAATTTGAAAACCCCCATATCCTAGGAAGATGCATAGTTTTAGATGTTAAAGGTGTAGAAGAATTGCATGATGATTTAGTTAATTACATTCGTGATAAAGGTTGTGTTGCTGACCAATCCAGGAAGTGGATTGGACATTGCACCATAGCCCAACTCACTGATGCTGCACTTTCCATTAAGGAAAATGTTGATTTTATAAACAACATGCAATTCAACTATAAAATCACTATCAATCCCTCATCACCGGCTAGACTTGAAATAGTTAAGCTTGGTGCTGAAAGGAAAGATGGTTTTTATGAAACCATAGCTAGCCACTGGATGGGAATTCGTTTTGAATATAATCCACCCACTGATAAGCTAGCTATGATTATGGGTTATTGTTGTTTAGAAGTGGTGCGTAAAGAGCTAGAAGAAGGTGACCTTCCCGAGAATGATGATGATGCTTGGTTTAAGCTATCGTACCATTATGAAAACAATTCTTGGTTCTTTCGACATGTCTACAGGAAAAGTTCTTATTTCCGTAAGTCTTGTCAAAATTTAGATTGTAATTGTTTGGGGTTTTATGAATCTTCAGTTGAAGAAGACATGTTTTTGATACTTTTAATTTCCTTACCAACGGCTTTTGCTGTTATAGGAGATTTAAAGTGTACTACAGTTTCCATTAATGATGTTGACACTGGTGTTCCTTCTATTAGCACTGATACTGTCGATGTTACTAATGGTTTAGGTACTTATTATGTTTTAGATCGTGTGTATTTAAATACTACGTTGTTGCTTAATGGTTACTACCCTACTTCAGGTTCTACATATCGTAATATGGCACTGAAGGGAACTTTACTATTGAGCACACTGTGGTTTAAACCACCTTTTCTTTCTGATTTTACTAATGGTATTTTTGCTAAGGTCAAAAATACCAAGGTTATTAAAGATGGTGTAATGTATAGTGAGTTTCCTGCTATAACTATAGGTAGTACTTTTGTAAATACATCTTATAGTGTGGTAGTACAACCACATACTACCATTTTGGGTAATAAATTACAAGGTTTCTTAGAGATCTCTGTTTGCCAGTATACTATGTGCGAGTACCCAAATACGATTTGTAATCCTAATCTGGGTAATCAACGCGTAGAACTATGGCATTGGGATACAGGTGTTGTTTCCTGTTTATATAAGCGTAATTTCACATACGATGTGAATGCTGATTATTTGTATTTCCATTTTTATCAAGAAGGTGGTACTTTTTATGCATATTTTACAGACACTGGTGTTGTTACTAAGTTTCTGTTTAATGTTTATTTAGGCACGGTGCTCTCACATTATTATGTCATGCCTTTGACTTGTAATAGTGCTCTGACTTTAGAATATTGGGTTACACCCCTCACTTCTAAACAATATCTACTAGCTTTCAATCAAGATGGTGTTATTTTTAATGCTGTTGATTGTAAGAGTGATTTTATGAGTGAGATTAAGTGTAAAACACTATCTATAGCACCATCTACTGGTGTTTATGAATTAAACGGTTACACTGTTCAGCCAATTGCAGATGTTTACCGACGTATACCTAATCTTCCCGATTGCAATATTGAGGCTTGGCTTAATGATAAGTCGGTGCCCTCTCCATTAAATTGGGAACGTAAGACCTTTTCAAATTGTAATTTTAATATGAGCAGCCTGATGTCTTTTATTCAGGCATACTCATTTACTTGTAATAATATTGATGCTGCTAAGATATATGGTATGTGTTTTTCCAGCATAACTATAGATAAGTTTGCAATACCCAATGGTAGGAAGGTTGACCTACAATTGGGTAATTTGGGCTATTTGCAGTCTTTTAATTATAGAATTGATACTACTGCTACAAGTTGTCAGTTGTATTATAATTTACCTGCTGCTAATGTTTCTGTTAGCAGGTTTAATCCTTCTACTTGGAATAGGAGATTTGGTTTTACAGAACAATCTGTTTTTAAGCCTCAACCTGCAGGTGTTTTTACTGATCATGATGTTGTTTATGCACAACATTGTTTTAAAGCTTCCACAAATTTCTGTCCGTGTAAATTGGATGGGTCTTTGTGTGTAGGTAATGGTCCTGGTATAGATGCTGGTTATAAAACTAGTGGCATAGGCACTTGTCCTGCAGGTACTAATTATTTAACTTGCCATAATGCTGCCCAATGTGATTGTTTGTGCACCCCAGACCCCATTACATCTAAAGCTACAGGGCCTTACAAGTGCCCCCAAACTAAATATTTAGTTGGCATAGGTGAGCACTGTTCGGGTCTTGCTATTAAAAGTGATCATTGTGGAGGTAATCCTTGTACTTGCCAACCACAAGCATTTTTGGGTTGGTCTGTTGACTCTTGTTTACAAGGGGATAGGTGTAATATTTTTGCTAATTTTATTTTGCATGATGTTAATAGTGGTACTACTTGTTCTACTGATTTACAAAAATCAAACACAGACATAATTCTTGGTGTTTGTGTTAATTATGATCTTTATGGTATTACTGGCCAAGGTATTTTTGTTGAGGTTAATGCGACTTATTATAATAGTTGGCAGAACCTTTTATATGATTCTAATGGTAATCTCTATGGTTTTAGAGACTACTTAACAAATAGAACTTTTATGATTCGTAGTTGCTATAGTGGTCGTGTTTCAGCGGCCTTTCATGCTAACTCTTCCGAACCAGCATTGCTATTTCGGAATATCAAATGCAATTACGTTTTTAATAACACTCTTTCACGACAGCTGCAACCTATTAACTATTTTGATAGCTATCTTGGTTGTGTTGTCAATGCTGATAATAGTACTTCTAGTGTTGTTCAAACATGTGATCTCACAGTAGGTAGTGGTTACTGTGTGGATTACTCTACAAAAAGACGAAGTCGTAGATCGATTACCACTGGTTATCGGTTTACTAATTTTGAGCCATTTACTGTTAATTCAGTAAATGATAGTTTAGAACCTGTAGGTGGTTTGTATGAAATTCAAATACCTTCAGAGTTTACTATAGGTAATATGGAGGAGTTTATTCAAACAAGCTCTCCTAAAGTTACTATTGATTGTTCTGCTTTTGTCTGTGGTGATTATGCAGCATGTAAATCACAGTTGGTTGAATATGGTAGCTTCTGTGACAATATTAATGCTATACTCACAGAAGTAAATGAACTACTTGACACTACACAGTTGCAAGTAGCTAATAGTTTAATGAATGGTGTCACTCTTAGCACTAAGCTTAAAGATGGCGTTAATTTCAATGTAGACGACATCAATTTTTCCCCTGTATTAGGTTGTTTAGGAAGCGATTGCAATAAAGTTTCCAGTAGATCTGCTATAGAGGACTTACTTTTTTCTAAAGTAAAGTTATCTGATGTCGGTTTCGTTGAGGCTTATAATAATTGTACTGGAGGTGCCGAAATTAGGGACCTCATTTGTGTGCAAAGTTATAATGGTATCAAGGTGTTGCCTCCACTGCTCTCGGAAAATCAGATCAGTGGATACACTTTGGCTGCCACTTCTGCTAGCCTGTTTCCTCCATGGTCAGCAGCAGCAGGTGTACCATTCTATTTAAACGTTCAGTATCGTATTAATGGTATTGGTGTTACCATGGATGTGTTAAGTCAAAATCAAAAGCTTATTGCTAATGCATTTAACAATGCTCTTGGTGCTATTCAGGAAGGGTTTGATGCTACCAATTCTGCTTTAGTTAAAATTCAAGCTGTTGTTAATGCAAATGCTGAAGCTCTTAATAACTTATTGCAACAACTCTCTAATAGATTTGGTGCTATAAGTTCTTCTTTACAAGAAATTCTATCTAGACTGGATGCTCTTGAAGCGCAAGCTCAGATAGACAGACTTATTAATGGGCGTCTTACCGCTCTTAATGCTTATGTTTCTCAACAGCTTAGTGACTCTACACTAGTAAAGTTTAGTGCAGCACAAGCTATGGAGAAGGTTAATGAATGTGTCAAAAGCCAATCATCTAGGATAAATTTTTGTGGTAATGGTAATCATATTATATCATTAGTGCAGAATGCTCCATATGGTTTGTATTTTATCCACTTTAGCTATGTCCCTACTAAGTATGTCACTGCGAAGGTTAGTCCCGGCCTGTGCATTGCTGGTGATAGAGGTATAGCCCCTAAGAGTGGTTATTTTGTTAATGTAAATAATACTTGGATGTTCACTGGTAGTGGTTATTACTACCCTGAACCTATAACTGGAAATAATGTTGTTGTTATGAGTACCTGTGCTGTTAATTATACTAAAGCGCCGGATGTAATGCTGAACATTTCAACACCCAACCTCCCTTATTTTAAGGAAGAGTTGGATCAATGGTTTAAAAACCAAACATCAGTGGCACCAGATTTGTCACTTGATTATATAAATGTTACATTCTTGGACCTACAAGATGAAATGAATAGGTTACAGGAGGCAATAAAAGTTTTAAATCAGAGCTACATCAATCTCAAGGACATTGGTACATATGAGTATTATGTAAAATGGCCTTGGTATGTATGGCTTTTAATTGGCTTTGCTGGTGTAGCTATGCTTGTTTTACTATTCTTCATATGCTGTTGTACAGGATGTGGGACTAGTTGTTTTAAGAAATGTGGTGGTTGTTGTGATGATTATACTGGACACCAGGAGTTAGTAATTAAAACATCACATGAAGACATGTTTTTGCTTCCTAGATTTGTTCTAGTTAGCTGCATAATTGGTAGCCTAGGTTTTGACAACCCTCCTACCAATGTTGTTTCGCATTTAAATGGAGATTGGTTTTTATTTGGTGACAGTCGTTCAGATTGTAATCATGTTGTTACTACCAACCCCCGTAATTATTCTTATATGGACCTTAATCCTGCCTTGTGTGGTTCTGGTAAAATATCATCTAAAGCTGGCAACTCCATTTTTAGGAGTTTTCACTTTACCGATTTTTATAATTACACAGGCGAAGGTCAACAAATTATTTTCTATGAGGGTGTTAATTTTACGCCTTATCATGCCTTTAAATGCACCACTTCTGGTAGTAATGATATTTGGATGCAGAATAAAGGCTTGTTTTACACTCAGGTTTATAAGAATATGGCTGTGTATCGCAGCCTTACTTTTGTTAATGTACCATATGTTTATAATGGCTCTGCACAATCTACAGCCCTTTGTAAATCTGGTAGTTTAGTTCTTAATAACCCTGCATATATAGCTCGTGAAGCTAATTTTGGGGATTATTATTATAAGGTTGAAGCTGATTTTTATTTGTCAGGTTGTGACGAGTATATCGTACCACTTTGTATTTTCAACGGCAAGTTTTTGTCGAATACAAAGTATTATGATGATAGTCAATATTATTTTAATAAAGACACTGGTGTTATTTATGGTCTCAATTCTACTGAAACCATTACCACTGGTTTTGACTTTAATTGTCATTATTTAGTTCTACCCTCTGGTAATTATTTAGCCATTTCAAATGAGCTATTGTTAACTGTTCCTACTAAAGCAATCTGTCTTAATAAGCGTAAGGATTTTACGCCTGTACAGGTTGTTGATTCGCGGTGGAACAATGCCAGGCAGTCTGATAACATGACGGCAGTTGCTTGTCAACCCCCGTACTGTTATTTTCGTAATTCTACTACCAATTATGTTGGTGTTTATGATATCAATCATGGGGATGCTGGTTTTACTAGCATACTCAGTGGTTTGTTATATGACTCACCTTGTTTTTCGCAGCAAGGTGTTTTTAGGTATGATAATGTTAGCAGTGTCTGGCCTCTCTACCCCTATGGCAGATGCCCTACTGCTGCTGATATTAATACCCCTGATGTACCTATTTGTGTGTATGATCCGCTACCAATTATTTTGCTTGGCATTCTTTTGGGTGTTGCGGTCATAATTATTGTAGTTTTGTTGTTATATTTTATGGTGGATAATGGTACTAGGCTGCATGATGCTATGTTTATGGCTGATGCTTATTTTGCAGACACTGTGTGGTATGTGGGGCAAATAATTTTTATAGTTGCCATTTGTTTATTGGTTATAATAGTTGTAGTGGCATTTTTGGCAACTTTTAAATTGTGTATTCAACTTTGCGGTATGTGTAATACCTTAGTACTGTCCCCTTCTATTTATGTGTTTAATAGAGGTAGGCAGTTTTATGAGTTTTACAATGATGTAAAACCACCAGTTCTTGATGTGGATGACGTTATGAGTAGTGTAACTACACCAGCACCAGTTTACACCTGGACTGCTGATGAAGCTATTAAATTCCTAAAGGAATGGAACTTTTCTTTGGGTATTATACTACTTTTTATTACAGTCATATTGCAATTTGGATATACAAGTCGCAGTATGTTTGTTTATGTTATTAAGATGGTCATTTTGTGGCTTATGTGGCCCCTTACTATCATCTTAACTATTTTCAATTGCGTGTATGCGTTGAATAATGTGTATCTTGGCTTCTCTATAGTTTTTACTATAGTGGCCATTATTATGTGGATTGTGTATTTTGTGAATAGTATCAGGTTGTTTATTAGAACTGGAAGTTGGTGGAGTTTCAACCCAGAAACAAACAACTTGATGTGTATAGATATGAAGGGAAGGATGTATGTTAGGCCGATAATTGAGGACTACCATACCCTTACGGTCACAATAATACGTGGTCATCTTTACATGCAAGGTATAAAACTAGGTACTGGCTATTCTTTGTCAGATTTGCCAGCTTATGTGACTGTTGCTAAGGTCTCGCACCTGCTCACGTATAAGCGTGGTTTTCTTGACAAGATAGGCGATACTAGTGGTTTTGCTGTTTATGTTAAGTCCAAAGTCGGTAATTACCGACTGCCATCAACCCAAAAGGGTTCTGGCTTGGACACCGCATTGTTGAGAAATAATATCATGTCTTTTACTCCTGGTAAGCAATCCAGTAGTAGAGCGTCCTCTGGAAATCGTTCTGGTAATGGCATCCTTAAGTGGGCCGATCAGTCCGACCAATCTAGAAATGTTCAAACCAGGGGTAGAAGAGCTCAACCCAAGCAAACTGCTACTTCTCAGCAACCATCAGGAGGGAATGTTGTACCCTACTATTCTTGGTTCTCTGGAATTACTCAGTTTCAAAAGGGAAAGGAGTTTGAATTTGCAGAGGGACAAGGTGTGCCTATTGCACCAGGAGTCCCAGCTACTGAAGCTAAGGGGTACTGGTACAGACACAACCGACGTTCCTTTAAAACAGCCGATGGCAACCAGCGTCAATTGCTACCACGATGGTATTTTTACTATCTTGGAACAGGACCGCATGCCAAAGACCAGTATGGCACCGACATTGACGGAGTCTACTGGGTCGCTAGTAACCAGGCTGATGTCAATACCCCGGCTGACATTCTCGATCGGGACCCAAGTAGCGATGAGGCTATTCCGACTAGGTTTCCGCCTGGCACGGTACTCCCTCAGGGTTACTATATTGAAGGCTCAGGAAGGTCTGCTCCTAATTCCAGATCTACTTCACGCGCATCCAGTAGAGCCTCTAGTGCAGGATCGCGCAGTAGAGCCAATTCTGGCAATAGAACCCCTACCTCTGGTGTAACACCTGATATGGCTGATCAAATTGCTAGTCTTGTTCTGGCTAAACTTGGCAAGGATGCCGCTAAGCCACAGCAAGTAACTAAGCAGACTGCCAAAGAAATCAGACAGAAAATTTTGAATAAACCCCGCCAGAAGAGGAGCCCCAATAAACAATGCACTGTTCAGCAGTGTTTTGGGAAGAGAGGCCCCAATCAGAATTTTGGTGGTGGAGAAATGTTAAAACTTGGAACTAGTGATCCACAGTTCCCCATTCTTGCAGAACTCGCACCCACAGCTGGTGCGTTTTTCTTTGGATCAAGATTAGAGTTGGCCAAAGTGCAGAATTTGTCTGGGAATCTTGACGAGCCCCAGAAGGATGTTTATGAATTGCGCTATAATGGCGCAATTAGATTTGATAGTACACTTTCAGGTTTTGAGACCATAATGAAGGTGTTGAATGAGAATTTGAATGCATACCAACAACAGGATGGTACGATGAATATGAGTCCAAAACCACAGCGTCAGCGTGGTCAGAAGAACGGACAAGGAGAAAATGATAATATAAGTGTTGCAGCGCCCAAAAGCCGTGTGCAGCAAAATAAGATTAGAGAGTTGACTGCAGAGGACATCAGCCTTCTTAAGAAGATGGATGAGCCCTTTACTGAAGACACCTCAGAAATA
>gi|145208932|gb|EF424619.1|_Bovine_coronavirus_E-AH187_complete_genome
ATGTCGAAGATCAACAAATACGGTCTCGAACTACACTGGGCTCCAGAATTTCCATGGATGTTTGAGGACGCAGAGGAGAAGTTGGACAACCCTAGTAGTTCAGAGGTGGATATAGTATGCTCCACCACTGCGCAAAAGCTGGAAACAGGCGGAATTTGTCCTGAAAATCATGTGATGGTGGATTGTCGCCGACTTCTTAAACAAGAATGTTGTGTGCAGTCTAGCCTAATACGTGAAATTGTTATGAATACACGTCCATATGATTTGGAGGTGCTACTTCAAGATGCTTTGCAGTCCCGCGAAGCAGTTTTGGTTACACCCCCTCTAGGTATGTCTCTGGAGGCATGCTATGTGAGAGGTTGTAATCCTAAWGGATGGACCATGGGTTTGTTTCGGCGTAGAAGTGTGTGTAACACTGGTCGCTGCGCTGTTAACAAGCATGTGGCCTATCAGCTATATATGATTGATCCTGCGGGTGTCTGTTTTGGTGCAGGTCAATTTGTGGGTTGGGTTATACCCTTAGCCTTTATGCCTGTGCAATCYCGGAAATTTATTGTTCCTTGGGTTATGTACTTGCGTAAGTGTGGCGAAAAGGGTGCCTACAACAAAGATCATAAACGTGGCGGTTTTGAACACGTTTATAATTTTAAAGTTGAGGATGCTTACGACTTGGTTCATGATGAGCCTAAGGGTAAGTTTTCTAAGAAGGCTTATGCTTTAATTAGAGGATACCGTGGTGTTAAACCGCTTCTTTATGTAGACCAGTATGGTTGTGATTATACTGGTGGTCTTGCAGATGGCTTAGAGGCTTATGCTGATAAGACATTGCAAGAAATGAAGGCATTATTTCCTATTTGGAGCCAGGAACTCCCTTTTGATGTAACTGTGGCATGGCACGTTGTGCGTGATCCACGTTATGTTATGAGACTGCAGAGTGCTTCTACTATACGTAGTGTTGCATATGTTGCTAACCCTACTGAAGACTTGTGTGATGGTTCTGTTGTCATAAAGGAACCTGTGCATGTTTATGCGGATGACTCTATTATTTTACGTCAACATAATTTAGTTGACATTATGAGTTGTTTTTATATGGAGGCAGATGCAGTTGTAAATGCTTTTTATGGTGTTGATTTGAAAGATTGTGGTTTTGTTATGCAGTTTGGTTATATTGACTGCGAACAAGACTTGTGTGATTTTAAAGGTTGGGTTCCTGGTAATATGATAGATGGTTTTGCTTGCACTACTTGTGGTCATGTCTATGAGACAGGTGATTTGCTAGCACAATCTTCAGGTGTTCTGCCTGTTAATCCTGTATTGCATACTAAGAGTGCAGCAGGTTATGGTGGTTTTGGTTGTAAGGATTCTTTTACCCTGTATGGCCAAACTGTAGTTTATTTTGGAGGTTGTGTGTATTGGAGTCCAGCACGTAATATATGGATTCCTATATTAAAATCTTCTGTTAAGTCTTATGACGGTTTGGTTTATACTGGAGTTGTAGGTTGCAAGGCTATTGTAAAGGAAACAAATCTCATTTGCAAAGCGTTGTACCTTGATTATGTTCAACACAAGTGTGGCAATTTACACCAGCGGGAGTTGCTAGGTGTGTCAGATGTGTGGCATAAACAATTGTTATTAAATAGAGGTGTGTACAAACCTCTTTTAGAGAATATTGATTATTTTAATATGCGGCGCGCTAAATTTAGTTTAGAAACTTTTACTGTTTGTGCAGATGGTTTTATGCCTTTTCTTTTAGATGATTTGGTTCCGCGCGCATATTATTTGGCAGTAAGTGGTCAAGCATTTTGTGACTACGCAGATAAAATCTGCCATGCTGTTGTGTCTAAGAGTAAAGAGTTACTTGATGTGTCTCTGGATTCTTTAAGTGCAGCTATACATTATTTGAATTCTAAAATTGTTGATTTGGCTCAACATTTTAGTGATTTTGGAACAAGTTTTGTTTCTAAAATTGTTCATTTCTTTAAGACTTTTACTACTAGCACTGCTCTTGCATTTGCATGGRTTTTATTTCATGTTTTGCATGGTGCTTATATAGTAGTAGAGAGTGATATATATTTTGTTAAAAACATTCCTCGTTATGCTAGTGCTGTTGCACAAGCATTTCGGAGTGTTGCTAAAGTTGTACTGGACTCTTTAAGAGTTACTTTTATTGATGGCCTTTCTTGTTTTAAGATTGGACGTAGAAGAATTTGTCTCTCAGGCAGTAAAATTTATGAAGTTGAGCGTGGCTTGTTACATTCATCTCAATTGCCATTAGATGTTTATGATTTAACCATGCCTAGTCAAGTTCAGAAAGCCAAGCAAAAACCTATTTATTTAAAAGGTTCTGGTTCTGATTTTTCATTAGCAGATAGTGTGGTTGAAGTTGTTACAACTTCACTTACACCATGTGGTTATTCTGAACCACCTAAAGTTGCAGATAAAATTTGCATTGTGGATAATGTTTATATGGCCAAGGCTGGTGACAAATATTACCCTGTTGTGGTTGATGGTCATGTAGGACTCTTGGATCAAGCATGGAGGGTTCCTTGTGCTGGAAGGCGTGTTACATTTAARGAACAGCCTACAGTAAATGAGATTGCAAGCACACCTAAGACTATTAAAGTTTTTTATGAGCTTGACAAAGATTTTAATACTATTTTAAACACTGCATGTGGAGTGTTTGAAGTAGATGATACCGTGGATATGGAGGAATTTTATGCTGTGGTGGTTGATGCCATAGAAGAGAAACTTTCTCCATGTAAGGAGCTTGAAGGTGTAGGTGCTAAAGTTAGTGCCTTTTTACAGAAATTAGAGGATAATTCCCTATTTTTATTTGATGAGGCTGGCGAGGAAGTTCTTGCTTCTAAATTGTATTGTGCTTTTACAGCTCCTGAAGATGATGACTTTYTTGAAGAAAGTGGTGTTGAAGAAGATGATGTAGAAGGTGAGGAAACTGATTTAACTGTCACAAGTGCTGGAGAGCCTTGTGTTGCCAGTGAACAGGAGGAGTCTTCTGAAATCTTAGAGGACACTTTGGATGATGGTCCATGTGTGGAGACATCTGATTCACAAGTTGAAGAAGATGTAGAAATGTCGGATTTTGCTGATCTTGAATCTGTGATTCAGGATTATGAAAATGTTTGTTTTGAGTTTTATACTACAGAGCCAGAATTTGTTAAAGTTTTGGATCTGTATGTGCCTAAAGCAACTCGCAACAATTGCTGGTTGCGATCAGTTTTGGCAGTGATGCAGAAACTGCCCTGTCAATTTAAAGATAAAAATTTGCAGGATCTTTGGGTGTTATATAAGCAACAGTATAGTCAGTTGTTTGTTGAYACCTTGGTTAATAAGATACCTGCTAATATTGTAGTTCCACAAGGTGGTTATGTTGCCGATTTTGCATATTGGTTCTTAACCTTATGTGATTGGCAGTGTGTTGCATACTGGAAATGCATTAAATGTGATTTAGCTCTTAAGCTTAAAGGCTTGGATGCTATGTTCTTTTATGGTGATGTTGTYTCACATGTGTGCAAGTGTGGTGAGTCTATGGTACTTATTGATGTTGATGTGCCATTTACAGCCCACTTTGCTCTTAAAGATAAGTTGTTTTGTGCATTTATTACTAAGCGTAKTGTGTATAAAGCAGCTTGTGTTGTGGATGTTAATGATAGTCATTCTATGGCTGTTGTTGATGGTAAACAAATTGATGATCATCGTGTCACTAGTATTACTAGTGATAAGTTYGATTTTATTATTGGGCATGGTATGTCATTTTCAATGACTACTTTYGAAATTGCCCAATTGTATGGTTCTTGTATAACACCTAATGTATGTTTTGTTAAAGGTGATATAATTAAAGTTTCTAAGCGTGTTAAAGCAGAAGTCGTTGTAAATCCTGCTAATGGCCATATGGCACATGGTGGTGGTGTTGCAAAGGCTATTGCAGTAGCAGCTGGACAGCAGTTTGTTAAAGAGACTACCGATATGGTTAAGTCTAAAGGAGTTTGTGCTACTGGAGACTGTTATGTCTCTACAGGGGGTAAATTATGTAAAACTGTGCTTAATGTTGTTGGACCTGATGCGAGAACACAGGGTAAACAAAGTTATGCATTGTTAGAGCGTGTTTATAAACATCTTAACAAATATGATTGTGTTGTTACAACTTTGATATCAGCTGGTATATTTAGTGTGCCTTCTGATGTGTCTTTAACATATCTACTTGGTACTGCCGAGAAACAAGTTGTTCTTGTTAGCAATAATCAAGAGGATTTTGATCTTATTTCTAAGTGTCAGATAACTGCYGTTGAGGGCACTAAGAAATTGGCAGAGCGTCTTTCTTTTAATGTAGGGCGTTCTATCGTTTACGAAACAGATGCTAATAAGTTGATTTTAAGCAATGACGTTGCATTTGTTTCGACATTTAATGTCTTACAGGATGTTTTATCCTTAAGACATGATATAGCACTTGATGATGATGCACGAACCTTTGTTCAGAGCAATGTTGATGTTGTACCTGAGGGTTGGCGTGTTGTCAATAAGTTTTATCAAATTAATGGTGTTAGAACCGTTAAGTATTTTGAGTGTCCCGGTGGCATAGATATATGCAGCCAGGATAAAGTTTTTGGTTATGTACAGCAGGGTAGTTTTAATAAGGCTACTGTTGCTCAAATTAAAGCCTTGTTTTTGGATAAAGTGGACATCTTGCTAACTGTTGATGGTGTCAATTTCACTAACAGGTTTGTGCCTGTAGGTGAAAGTTTTGGTAAGAGTCTAGGAAATGTGTTCTGTGATGGAGTTAATGTCACGAAACATAAGTGTGATATAAATTATAAAGGTAAAGTCTTTTTCCAGTTTGATAATCTTTCTAGTGAAGATTTAAAGGCTGTAAGAAGTTCTTTTAATTTTGATCAGAAGGAATTGCTTGCCTACTACAACATGCTTGTTAATTGTTCTAAATGGCAGGTTGTTTTTAATGGTAAGTATTTCACTTTTAAGCAAGCTAATAACAATTGTTTTGTTAATGTTTCTTGCTTAATGCTCCAGAGTTTGAATCTGAAATTTAAAATTGTTCAATGGCAGGAGGCGTGGCTTGAATTTCGTTCTGGTCGCCCTGCTAGATTTGTATCTTTGGTTTTGGCCAAAGGTGGGTTTAAATTTGGTGATCCTGCTGATTCTAGAGATTTCTTGCGTGTTGTGTTTAGTCAAGTTGATTTGACAGGGGCAATATGTGATTTTGAAATTGCATGTAAATGTGGTGTAAAGCAGGAACAGCGTACTGGTGTKGACGCTGTTATGCATTTTGGTACATTGAGTCGTGAAGATCTTGAGATTGGTTAYACCGTGGATTGTTCTTGCGGTAAAAAGCTAATCCATTGTGTACGATTTGATGTACCATTTTTAATTTGTAGTAATACACCTGCTAGTGTAAAATTACCTAAGGGTGTAGGAAGTGCAAATATTTTTAAAGGTGATAAGGTTGGTCATTATGTTCATGTTAAGTGTGAACAGTCTTATCAGCTTTATGATGCTTCTAATGTTAAGAAGGTTACAGACGTTACTGGCAATTTGTCAGATTGTTTGTATCTTAAAAATTTGAAACAAACTTTTAAATCGGTGTTAACCACCTATTATTTGGATGATGTTAAGAAAATTGAGTATAAACCTGACTTGTCACAATATTATTGTGACGGAGGTAAGTATTATACTCAGCGTATTATTAAAGCCCAATTTAAAACATTTGAGAAAGTAGATGGTGTGTATACTAATTTTAAATTGATAGGACACACCATCTGTGATATTCTTAATGCTAAGTTGGGTTTTGATAGCTCTAAAGAGTTTGTTGAATATAAAGTTACTGAGTGGCCAACAGCTACAGGTGATGTGGTGTTGGCTACTGATGATTTGTATGTTAAGAGATATGAAAGGGGTTGTATTACTTTTGGTAAACCTGTTATATGGTTAAGCCATGAGCAAGCTTCCCTCAATTCTTTAACATATTTTAATAGACCTTTATTGGTTGATGAGAATAAATTTGATGTTTTAAAAGTGGATGATGTTGACGATGGTGGTGATATCTCAGAGAGTGATGCCAAAGAATCCAAAGAAATCAACATTATTAAGTTAAGTGGTGTTAAAAAACCATTTAAGGTTGAAGATAGTGTCATTGTTAATGATGATACTAGTGAAATCAAATATGTTAAGAGTTTGTCTATAGTTGATGTGTATGATATGTGGCTTACAGGTTGTAGGTATGTTGTTAGGACTGCTAATGCTTTGAGCATGGCAGTTAACGTACCTACAATACGTAAGTTTATAAAATTTGGTATGACTCTTGTTAGTATACCAATTGATTTGTTAAATTTAAGAGAGATTAAGCCTGTTTTTAATGTGGTTAAAGCTGTGCGAAATAAAATTTCTGCATGCTTTAATTTTATTAAATGGCTTTTTGTCTTATTATTTGGCTGGATTAAAATATCCGCTGATAATAAAGTAATTTACACCACAGAAGTTGCATCAAAGCTTACATGTAAGCTTGTAGCTTTAGCTTTTAAAAATGCGTTTTTGACATTTAAGTGGAGTGTGGTTGCTAGAGGTGCTTGCATTATAGCGACTATATTTCTATTGTGGTTTAATTTTATATATGCCAATGTAATTTTTAGTGATTTTTATTTGCCTAAAATTGGTTTCTTGCCGACTTTTGTTGGTAAGATCGCACAGTGGATTAAGAGCACTTTTAGTCTTGTAACTATTTGTGATCTATATTCCATTCAGGATGTGGGTTTTAAGAATCAGTATTGTAATGGAAGTATCGCATGTCAATTCTGCTTGGCAGGATTTGATATGTTAGATAATTATAAAGCCATTGATGTAGTACAGTATGAAGCTGATAGGAGAGCATTTGTTGATTATACAGGTGTGTTAAAGATTGTCATTGAATTGATAGTTAGTTACGCCCTGTATACGGCATGGTTCTACCCATTGTTTGCTCTTATTAGTATTCAGATCTTGACCACTTGGCTGCCTGAGCTTTTTATGCTTAGTACATTACATTGGAGTGTTAGGTTGCTGGTGTCTTTAGCTAATATGTTACCAGCACATGTGTTTATGAGGTTTTATATTATTATTGCCTCTTTTATTAAGCTGTTTAGCTTGTTTAGGCATGTTGCCTATGGTTGTAGTAAACCTGGTTGTTTGTTTTGTTACAAGAGGAATCGTAGTCTACGTGTTAAATGTAGTACTATTGTTGGTGGCATGATACGCTATTACGATGTTATGGCTAATGGTGGCACTGGCTTTTGTTCAAAACATCAATGGAATTGCATTGATTGTGATTCTTATAAACCAGGTAATACTTTTATTACTGTTGAGGCCGCTCTTGATTTATCTAAGGAATTGAAACGGCCTATTCAGCCTACAGATGTTGCTTATCATACGGTTACGGATGTTAAGCAAGTTGGTTGTTATATGCGCTTGTTCTATGAGCGTGATGGACAGCGCACATATGATGATGTTAATGCTAGTTTGTTTGTGGATTATAGTAATTTGCTACATTCTAAGGTTAAGGGTGTGCCTAATATGCATGTTGTGGTAGTGGAAAATGATGCCGATAAAGCTAATTTTCTTAATGCTGCTGTATTTTATGCACAGTCYTTGTTTAGACCTATTTTAATGGTTGATAAAAATCTGATAACTACTGCTAATACTGGTACGTCTGTTACAGAAACTATGTTTGATGTTTATGTKGACACATTTTTGTCTATGTTTGATGTGGAYAAAAAGAGTCTTAATGCTTTAATAGCAACTGCGCATTCTTCTATAAAACAGGGTACGCAGATTTGTAAAGTTTTGGATACCTTTTTAAGCTGTGCTCGTAAAAGTTGTTCTATTGATTCAGATGTTGATACTAAGTGTTTAGCTGATTCTGTCATGTCTGCTGTATCGGCAGGCCTTGAATTGACGGATGAAAGTTGTAATAACTTGGTGCCAACATATTTGAAGGGTGATAACATTGTGGCAGCTGATTTAGGTGTTCTGATTCAAAATTCTGCTAAGCATGTGCAGGGTAATGTTGCTAAAMTAGCCGGTGTTTCCTGTATATGGTCTGTGGATGCTTTTAATCAGCTAAGTTCTGATTTCCAGCATAAATTGAAGAAAGCATGTTGTAAAACTGGTTTGAAATTGAAGCTTACTTATAATAAGCAGATGGCTAATGTCTCTGTTTTAACTACACCTTTTAGTCTTAAAGGGGGTGCAGTTTTTAGTTATTTTGTTTATGTATGTTTTCTGTTGAGTTTGGTTTGTTTTATTGGATTGTGGTGCTTAATGCCCACTTACACAGTACACAAATCAGATTTTCAGCTTCCCGTTTATGCCAGTTATAAAGTTTTAGATAATGGTGTTATTAGAGATGTTAGCGTTGAAGATGTTTGTTTCGCTAACAAATTTGAACAATTTGATCAATGGTATGAGTCTACATTTGGTCTAAGTTATTATAGTAACAGTATGGCTTGTCCCATTGTTGTTGCTGTAGTAGACCAGGATYTTGGCTCTACTGTGTTTAATGTCCCTACCAAAGTGTTACGATATGGTTACCATGTGTTGCACTTTATTACACATGCACTTTCTGCTGATGGAGTGCAGTGTTATACGCCACATAGTCAAATATCGTATTCTAATTTTTATGCTAGTGGCTGTGTGCTTTCCTCCGCTTGTACTATGTTTGCAATGGCCGATGGTAGTCCACAACCTTATTGTTATACAGAGGGGCTTATGCAGAACGCTTCTCTGTATAGTTCATTGGTACCTCACGTGCGGTATAATCTTGCTAATGCTAAAGGTTTTATCCGTTTTCCAGAAGTGTTGCGAGAAGGACTTGTGCGTATTGTGCGTACTCGTTCTATGTCGTATTGCAGAGTTGGATTATGTGAGGAAGCTGATGAGGGTATATGCTTTAACTTTAATGGTTCTTGGGTGCTTAATAATGATTATTATAGATCATTGCCTGGGACCTTTTGTGGTAGAGATGTTTTTGACTTAATTTATCAGCTTTTTAAAGGTTTAGCACAGCCTGTGGATTTCTTGGCATTGACTGCTAGTTCTATTGCTGGTGCTATACTTGCTGTAATTGTTGTTTTGGTGTTTTATTACTTAATAAAGCTTAAACGTGCTTTTGGTGATTACACCAGTATTGTTTTTGTYAATGTGATTGTGTGGTGTGTAAATTTTATGATGCTTTTTGTGTTTCAAGTTTACCCTACACTTTCTTGTGTATATGCTATTTGTTATTTTTATGCCACGCTTTATTTCCCTTCGGAGATAAGTGTGATAATGCATTTACAATGGCTAGTTATGTATGGCACTATTATGCCTTTATGGTTTTGTTTGCTATATATATCTGTTGTTGTTTCAAATCATGCTTTTTGGGTATTCGCTTACTGCAGACGGCTTGGTACTTCTGTTCGTAGTGATGGTACATTTGAAGAAATGGCTCTTACTACTTTTATGATTACAAAAGATTCTTATTGTAAGCTTAAGAATTCTTTGTCTGATGTTGCTTTTAATAGATATTTGAGTTTGTATAATAAATATAGGTATTACAGCGGTAAAATGGATACTGCTGCATATAGGGAGGCTGCTTGTTCTCAGTTGGCTAAAGCAATGGATACATTTACCAATAATAATGGTAGTGATGTGCTTTACCAACCACCTACTGCTTCCGTTTCAACTTCATTCTTGCAATCTGGYATTGTGAAAATGGTTAATCCTACTTCTAAGGTAGAACCATGTATTGTCAGTGTTACCTATGGTAATATGACATTGAATGGTTTATGGTTGGATGATAAGGTCTACTGTCCCAGACATGTGATATGTTCTGCTTCAGATATGACTAATCCAGATTATACAAATTTGTTGTGTAGAGTAACATCAAGTGATTTTACTGTATTGTTTGATCGTTTAAGCCTTACAGTGATGTCTTATCAAATGCAGGGTTGTATGCTTGTTCTTACAGTGACCCTGCAAAATTCTCGTACGCCAAAATATACATTTGGTGTGGTTAAGCCTGGTGAGACTTTTACTGTTTTAGCTGCTTATAACGGCAAACCACAAGGAGCCTTTCATGTGACTATGCGTAGTAGTTATACCATTAAGGGTTCCTTTTTATGCGGATCTTGTGGATCTGTTGGTTATGTGCTAATGGGTGATTGTGTTAAATTTGTGTATATGCATCAATTGGAGCTTAGTACTGGTTGTCATACTGGTACTGATTTCAATGGGGATTTTTATGGTCCTTATAAGGATGCWCAGGTTGTCCAATTGCCCGTTCAGGATTATATACAATCTGTTAATTTTGTAGCATGGCTTTATGCTGCTATACTTAATAATTGTAATTGGTTTGTACAAAGTGATAAGTGTTCTGTTGAAGATTTTAATGTGTGGGCTTTGTCTAATGGGTTTAGCCAAGTTAAGTCTGATCTTGTTATAGATGCTTTAGCTTCTATGACTGGTGTGTCTTTGGAAACACTATTGGCTGCTATTAAGCGTCTCAAGAATGGTTTTCAAGGACGTCAGATTATGGGTAGTTGCTCCTTTGAGGATGAATTGACACCTAGCGATGTTTATCAACAACTCGCTGGTATCAAGTTACAATCAAAGCGYACTAGATTGGTTAAAGGCATTGTTTGTTGGATTATGGCTTCTACATTTTTGTTTAGTTGTATAATTACAGCATTTGTGAAATGGACTATGTTTATGTATGTAACTACTAATATGCTTAGTATTACGTTTTGTGCACTTTGTGTTATAAGTTTGGCCATGTTGTTGGTTAAACATAAGCATCTTTATTTGACTATGTATATAATTCCTGTGCTTTTTACACTGCTGTATAACAACTATTTGGTTGTGTACAAGCAGACATTTAGAGGCTATGTTTATGCATGGCTATCATATTATGTTCCATCAGTTGAGTATACTTATACTGATGAAGTTATTTACGGCATGTTATTGCTTATAGGAATGGTTTTTGTTACATTACGTAGCATTAACCATGATTTGTTTTCTTTTATAATGTTTGTTGGTCGTGTGATTTCTGTTGTCTCTTTGTGGCACATGGGTTCTAACTTAGAGGAAGAAATTCTTCTTATGTTGGCTTCTCTTTTTGGTACTTACACATGGACAACAGCTTTATCTATGGCTGCAGCAAAGGTTATTGCTAAGTGGGTTGCTGTGAATGTTTTRTATTTCACAGATATACCTCAAATTAAGATAGTGCTTGTATGCTATTTGTTTATAGGTTATATTATTAGCTGTTATTGGGGTTTGTTTTCCTTGATGAACAGTTTGTTTAGAATGCCTTTGGGTGTTTATAATTATAAAATTTCAGTACAGGAATTAAGATATATGAATGCTAATGGATTGCGCCCTCCTAAGAATAGTTTTGAAGCCCTTATGCTTAATTTTAAGCTTTTGGGTATTGGAGGTGTGCCAATTATTGAAGTATCTCAATTTCAATCAAAATTGACTGATGTTAAATGTGCTAATGTTGTCTTGCTTAATTGCTTGCAACATTTGCATGTTGCTTCTAACTCTAAGTTGTGGCAGTATTGTAGCACTTTGCACAATGAAATACTTGCCACTTCTGACCTGGGTGTTGCTTTTGAAAAGCTTGCTCAGTTGTTAATTGTTTTGTTTGCTAATCCAGCTGCTGTGGATAGCAAGTGCCTGACTAGTATTGAAGAAGTTTGCGACGATTACGCAAAGGACAATACTGTTTTGCAGGCTTTACAGAGTGAATTTGTTAATATGGCTAGCTTCGTTGAATATGAAGTTGCTAAGAAAAATCTTGATGAGGCGCGTTCTAGTGGTTCTGCTAATCAACAGCAGTTAAAACAGCTAGAGAAAGCCTGTAATATTGCTAAATCTGCTTATGAACGCGACCGTGCTGTAGCAAGAAAGTTGGAGCGTATGGCAGATTTGGCTCTCACTAATATGTATAAAGAAGCTAGAATTAATGATAAGAAGAGTAAGGTTGTTTCTGCCTTGCAAACTATGCTTTTTAGTATGGTGCGTAAGTTAGATAATCAAGCTCTGAATTCAATATTAGATAATGCTGTGAAGGGTTGTGTACCATTGAATGCAATCCCTTCATTGGCTGCAAATACTCTGACTATAATTGTACCAGATAAAAGTGTTTACGATCAGGTAGTTGACAATGTCTATGTTACCTATGCGGGTAATGTATGGCAGATTCAAACTATCCAAGATTCAGATGGTACAAATAAGCAGTTGAATGAGATATCTGATGATTGTAACTGGCCACTAGTTATTATTGCAAATCGGCATAATGAGGTATCTGCWACCGTTTTGCAAAATAATGAATTAATGCCTGCTAAGTTGAAAACTCAGGTYGTTAATAGTGGTCCAGATCAGACTTGTAACACACCTACTCAATGTTACTATAATAATAGTAACAATGGGAAGATTGTTTATGCTATACTTAGTGATGTTGATGGTCTTAAGTATACAAARATTCTTAAAGATGATGGCAATTTTGTTGTTTTGGAGTTAGATCCTCCTTGTAAATTTACTGTTCAAGATGTTAAAGGTCTTAAAATTAAGTACCTTTATTTTGTAAAAGGTTGTAACACACTAGCAAGAGGMTGGGTTGTTGGTACAATTTCTTCTACAGTTAGATTGCAAGCTGGAACTGCTACTGAGTATGCTTCCAACTCATCTATATTATCTTTATGTGCGTTTTCTGTAGATCCTAAGAAAACGTATTTAGATTTTATACAACAGGGAGGAACACCTATTGCCAATTGTGTTAAAATGTTGTGTGACCATGCTGGTACCGGTATGGCCATTACTGTTAAACCCGATGCTACCACTAGTCAGGATTCATATGGTGGTGCGTCTGTTTGTATATATTGCCGCGCACGAGTTGAACACCCAGATGTTGATGGGTTGTGCAAATTACGCGGCAAGTTTGTACAAGTGCCTGTAGGTATAAAAGATCCTGTGTCTTATGTTTTGACACATGATGTTTGTCAAGTTTGTGGATTTTGGCGGGATGGAAGTTGTTCATGTGTTAGCACTGACACTACTGTTCAGTCAAAAGATACTAATTTTTTAAACCGGGGTACGAGTGTAGATGCCCGTCTCGTACCCTGTGCCAGTGGTTTATCTACTGATGTACAATTAAGGGCATTTGAYATTTGCAATGCTAGTGTTGCTGGCATTGGTTTACATTTAAAAGTTAATTGCTGCCGTTTTCAGCGTGTTGATGAGAACGGTGATAAATTAGATCAGTTCTTTGTTGTTAAGAGGACAGATCTGACTATATATAATAGAGAGATGGAATGCTATGAGCGTGTAAAAGATTGTAAGTTTGTGGCTGAACACGATTTCTTTACATTTGATGTAGARGGTAGTCGTGTGCCACATATTGTACGCAAGGATTTAACAAAGTATACTATGTTGGATCTTTGCTATGCGTTGCGACATTTTGATCGCAATGATTGCATGCTGCTTTGTGACATTCTCTCTATATATGCTGGTTGTGAACAATCCTACTTTACTAAGAAGGATTGGTATGATTTTGTTGAAAATCCTGATATTATTAATGTTTATAAAAAGCTAGGACCTATTTTTAATAGAGCCCTAGTTAGCGCTACTGAGTTTGCAGACAAATTGGTGGAGGTAGGCTTAGTAGGCATTTTAACACTTGATAACCAAGATTTAAATGGTAAATGGTATGATTTTGGTGACTATGTTATTGCAGCCCCAGGTTGTGGTGTTGCTATAGCAGACTCTTATTATTCTTATATGATGCCTATGCTGACCATGTGTCATGCATTGGATTGTGAATTGTATGTGAATAATGCTTATAGACTATTTGATCTTGTACAGTATGATTTTACTGATTACAAGCTCGAATTGTTTAATAAGTATTTTAAGCACTGGAGTATGCCATACCATCCTAACACGGTTGATTGTCAGGATGATCGGTGTATCATACATTGTGCTAATTTTAACATACTTTTTAGTATGGTTTTACCTAATACATGTTTTGGGCCTCTTGTTAGGCAAATTTTTGTGGATGGTGTTCCTTTTGTTGTTTCAATTGGATACCATTATAAAGAACTTGGTATTGTGATGAATATGGATGTGGATACACATCGTTATCGCTTGTCTTTAAAAGACTTGCTTTTATATGCTGCTGAYCCAGCTTTGCATGTAGCTTCTGCTAGTGCATTGTATGATTTACGCACTTGCTGTTTTAGTGTTGCGGCTATAACAAGCGGTGTRAAATTTCAAACAGTTAAACCTGGTAATTTTAATCAGGATTTTTATGATTTTATTTTAAGTAAGGGCCTGCTTAAAGAGGGTAGTTCAGTTGATCTGAAGCACTTTTTCTTTACGCAGGATGGTAATGCTGCTATTACWGATTATAATTATTATAAGTAYAATTTGCCCACCATGGTGGACATTAAGCAGTTGTTGTTTGTTTTGGAAGTTGTTTATAAGTATTTTGAGATTTATGATGGTGGGTGTATACCGGCATCACAAGTCATTGTTAATAATTATGATAAGAGTGCTGGCTATCCATTTAATAAATTTGGAAAAGCCAGGCTCTATTATGAAGCATTATCATTTGAGGAGCAGGATGAAATTTACGCCTATACTAAGCGCAATGTCCTGCCAACACTTACTCAAATGAATTTGAAATATGCTATTAGTGCTAAGAATAGAGCCCGCACTGTTGCTGGTGTTTCCATACTTAGTACTATGACTGGCAGAATGTTTCATCAAAAATGTTTGAAAAGTATAGCAGCTACACGTGGTGTTCCTGTTGTTATAGGCACCACTAAATTTTATGGCGGCTGGGATGATATGTTACGTCGCCTTATTAAAGATGTTGATAATCCTGTACTTATGGGTTGGGATTATCCTAAGTGTGATCGTGCTATGCCAAACATACTACGTATTGTTAGTAGTCTGGTTTTGGCTCGAAAACATGAGGCATGTTGTTCGCAAAGCGATAGGTTTTATCGACTTGCGAATGAATGCGCACAAGTTYTGAGTGAAATTGTTATGTGTGGTGGCTGTTATTATGTTAAGCCTGGTGGCACTAGTAGTGGTGATGCAACTACTGCTTTTGCTAATTCAGTTTTTAACATATGTCAAGCTGTTTCAGCCAATGTATGTGCTTTAATGTCATGCAATGGTAATAAGATTGAAGATTTGAGTATACGTGCTCTTCAGAAGCGCTTATACTCACATGTGTATAGAAGTGATATGGTTGATWCAACCTTTGTCACAGAATATTATGAATTTTTAAATAAGCATTTTAGTATGATGATTTTGAGTGATGATGGCGTTGTGTGTTATAATTCTGATTATGCGTCCAAAGGGTATATTGCTAATATAAGTGCCTTTCAACAGGTATTGTATTATCAAAATAACGTTTTTATGTCAGAATCCAAATGTTGGGTTGAAAATGACATAAACAATGGACCTCATGAATTCTGTTCACAACACACAATGCTTGTAAAGATGGATGGGGACGATGTCTATCTTCCATATCCTGATCCTAGTCGTATATTAGGAGCTGGATGTTTTGTAGATGATTTGTTAAAGACTGATAGTGTTCTTTTAATAGAACGATTTGTAAGTCTTGCAATAGATGCTTATCCACTTGTGTACCACGAAAATGAAGAATACCAAAAGGTTTTTCGTGTTTATTTGGAGTATATAAAGAAGTTGTACAATGACCTGGGTAATCAGATCTTGGATAGCTACAGTGTTATTTTAAGTACTTGTGATGGACAAAAGTTTACTGATGAGTCCTTTTACAAGAACATGTATTTAAGAAGTGCAGTTATGCAGAGTGTTGGAGCTTGCGTGGTCTGCTCTTCTCAAACATCATTACGTTGTGGCAGTTGCATCAGAAAGCCTCTTCTTTGCTGCAAGTGTTGTTACGATCAYGTTATGGCAACTGATCATAAATATGTTTTGAGTGTTTCACCATATGTGTGTAACGCACCAGGATGTGATGTAAATGATGTTACCAAATTGTATCTAGGTGGTATGTCATATTATTGTGAAGATCATAAGCCACAATATTCGTTTAAGTTGGTAATGAATGGTATGGTTTTTGGTCTATATAAACAATCTTGTACAGGATCTCCGTACATAGATGATTTTAATCGTATAGCTAGTTGTAAATGGACTGATGTTGATGATTACATACTGGCTAATGAATGTACAGAGCGCTTGAAATTGTTTGCTGCAGAAACKCAAAAGGCGACTGAGGAAGCCTTTAAGCAGAGTTATGCATCAGCAACAATACAAGAGATTGTTAGCGAGCGCGAATTGATCCTYTCTTGGGAGATTGGAAAAGTGAAGCCACCACTTAATAAAAATTATGTTTTTACTGGCTACCATTTTACTAAAAATGGCAAGACAGTTTTAGGTGAGTATGTTTTTGATAAGAGTGAGTTGACTAATGGTGTGTATTATCGCGCCACAACCACTTATAAGCTATCTGTAGGAGATGTTTTTGTTTTAACCTCTCATTCAGTAGCTAATTTAAGTGCTCCTACGCTTGTGCCGCAGGAGAATTATAGTAGTATTAGATTTGCTAGTGTTTATAGTGTGCTTGAGACGTTTCAGAACAATGTCGTTAATTATCAACACATTGGTATGAAACGTTATTGYACCGTGCAAGGACCTCCTGGTACAGGAAAGTCACATCTTGCTATTGGTCTTGCTGTTTATTATTGTACAGCACGTGTAGTATACACTGCGGCCAGCCATGCAGCTGTTGACGCATTGTGTGAAAAAGCATACAAATTTTTGAATATAAATGACTGCACTCGTATTGTTCCTGCCAAGGTCAGGGTGGAGTGCTATGATAAGTTTAAAATTAATGACACCACTCGTAAGTATGTGTTTACTACTATAAATGCATTACCTGAGATGGTGACTGATATTGTTGTTGTAGATGAAGTTAGTATGCTTACCAATTATGAGCTTTCTGTTATTAATGCTCGTATTCGTGCTAAGCATTATGTTTACATTGGTGATCCTGCTCAATTGCCAGCACCACGTGTGTTATTGAGCAAGGGTACACTTGAACCTAAATATTTTAACACTGTTACTAAGCTTATGTGTTGCTTAGGGCCAGACATTTTTCTTGGTACATGTTATAGATGTCCTAAGGAAATTGTTGATACAGTGTCTGCCTTGGTTTATGAAAATAAGCTTAAGGCTAAGAATGAAAGTAGTTCATTGTGTTTTAAGGTCTATTATAAAGGCGTTACAACACATGAAAGTTCTAGTGCTGTAAATATGCAGCAGATTTATTTGATTAATAAGTTTTTGAAGGCTAACCCTTTGTGGCATAAAGCCGTTTTTATTAGCCCATATAATAGCCAGAACTTTGCAGCTAAGCGTGTTTTGGGTTTGCAAACCCAGACCGTGGATTCTGCTCAAGGTTCTGAATATGATTATGTTATATATTCACAGACTGCAGAAACAGCGCATTCTGTAAATGTTAATCGCTTCAATGTTGCTATTACTCGAGCCAAGAAAGGTATTCTTTGTGTTATGAGTAATATGCAGTTGTTTGAAGCATTACAGTTTACTACATTGACCTTAGATAAAGTGCCACARGCCGTTGAAACGAGAGTTCAATGTAGTACCAATTTATTTAAAGATTGTAGCAAGAGTTATAGTGGTTACCACCCAGCTCACGCTCCTTCATTTTTGGCAGTAGATGACAAATATAAGGCAACTGGCGATTTAGCCGTGTGTCTTGGTATTGGAGATTCTGCTGTTACATATTCAAGATTAATATCACTCATGGGTTTTAAACTTGATGTCACCCTTGATGGGTATTGTAAGCTTTTTATAACTAAAGAAGAAGCTGTTAAACGCGTGCGTGCTTGGGTTGGCTTTGATGCTGAAGGCGCTCATGCCACGCGTGATAGCATTGGGACAAATTTCCCACTTCAATTAGGGTTTTCTACAGGAATTGATTTTGTTGTGGAAGCCACTGGTTTGTTTGCTGATAGAGATGGTTACAGCTTTAAAAAGGCTGTRGCTAAAGCTCCTCCTGGTGAACAATTTAAGCATCTCATCCCTTTGATGACGAGAGGTCAGCGCTGGGATGTTGTTAGACCTAGAATAGTACAAATGTTTGCAGATCATTTAATTGATCTGTCTGATTGTGTTGTGCTAGTTACATGGGCAGCCAACTTTGAGCTCACWTGTCTCCGATACTTTGCAAAAGTAGGTCGTGAGATYTCTTGTAATGTGTGCACTAAACGTGCCACAGCTTACAATTCTAGAACTGGTTACTATGGTTGTTGGCGCCATAGTGTTACATGTGATTACTTGTATAATCCACTTATTGTTGATATTCAACAGTGGGGATATATTGGATCTTTATCAAGTAATCATGATTTATATTGTAGTGTCCACAAAGGAGCACATGTTGCTTCATCTGATGCTATAATGACACGGTGTTTGGCCGTTTATGATTGTTTTTGCAATAATATTAATTGGAATGTGGAGTATCCCATTATTTCAAATGAGTTAAGTATTAATACCTCTTGTAGGGTCTTGCAGCGTGTTATGCTTAAAGCTGCAATGCTCTGCAACAGATATACTTTGTGTTATGATATTGGCAACCCAAAAGCGATTGCCTGTGTCAAAGATTTTGATTTTAAGTTCTATGATGCCCAACCAATTGTTAAGTCTGTCAAGACTCTTTTGTATTCTTTTGAGGCACATAAGGACTCTTTTAAAGATGGTTTGTGTATGTTTTGGAACTGTAATGTGGATAAGTATCCACCGAATGCAGTTGTATGTAGATTTGACACGAGAGTGTTGAATAATTTAAATCTTCCTGGCTGTAATGGAGGTAGTTTGTATGTTAATAAACATGCATTCCACACTAAACCCTTTTCTAGGGCAGCCTTTGAGCATTTGAAGCCTATGCCATTTTTCTATTATTCAGATACGCCTTGCGTGTATATGGATGGCATGGATGCTAAGCAGGTTGATTATGTACCTTTGAAATCCGCCACTTGCATCACAAGATGCAATTTAGGTGGTGCAGTTTGTTTAAAACATGCTGAAGAGTATCGTGAGTACCTAGAGTCTTACAATACAGCTACTACAGCAGGTTTTACTTTTTGGGTCTATAAGACATTTGATTTTTATAATTTGTGGAATACGTTCACCAAGCTACAAAGCTTGGAGAACGTTGTATATAATTTAGTCAAAACTGGTCATTATACAGGACAGGCTGGTGAAATGCCTTGTGCCATTATAAATGATAAGGTTGTGGCTAAGATCGATAAGGAGGATGTTGTCATTTTTATTAATAATACAACATACCCTACTAATGTGGCTGTTGAATTATTTGCAAAGCGCAGTATTCGACACCATCCAGAGCTTAAGCTCTTTAGAAATTTGAATATAGACGTGTGTTGGAAGCACGTCATTTGGGATTATGCTAGAGAAAGTATATTTTGCAGTAATACCTATGGTGTCTGCATGTATACAGATTTAAAGTTCATTGATAAATTGAATGTCCTTTTTGATGGTCGTGATAATGGTGCTCTTGAAGCTTTTAAACGCTCTAATAATGGCGTTTACATTTCCACGACAAAAGTTAAGAGTCTTTCGATGATAAAAGGTCCACCGCGTGCTGAATTAAATGGCGTAGTGGTGGACAAGGTTGGAGACACTGATTGTGTGTTTTATTTTGCTGTGCGTAAAGAGGGTCAGGATGTCATCTTCAGCCAATTCGACAGCCTGAGAGTCAGCTCTAACCAGAGCCCACAAGGTAATCTGGGGAGTAATGAACCCGGTAATGTCGGTGGTAATGATGCTCTGGCAACCTCCACTATCTTTACACAAAGCCGTGTTATTAGCTCTTTTACATGTCGTACTGATATGGAAAAAGATTTTATAGCTTTAGATCAAGACGTGTTTATTCAGAAGTATGGTTTGGAGGACTATGCCTTTGAACACATTGTTTATGGTAATTTCAACCAGAAGATTATTGGTGGTTTGCATTTGTTAATAGGCTTGTACCGAAGACAGCAAACTTCCAATCTGGTTATTCAGGAGTTTGTTTCATACGACTCCAGCATACACTCTTATTTTATCACTGATGAGAAGAGTGGTGGTAGTAAGAGTGTTTGCACTGTTATAGATATTTTGTTGGATGATTTTGTGGCTCTTGTTAAGTCACTTAATCTCAACTGTGTGAGTAAGGTTGTTAACGTTAATGTTGATTTTAAAGATTTTCAGTTCATGCTTTGGTGTAACGATGAGAAAGTTATGACTTTCTATCCTCGTTTGCAAGCTGCATCTGACTGGAAGCCTGGTTATTCTATGCCTGTATTATACAAGTATTTGAATTCCCCAATGGAAAGAGTTAGTCTCTGGAATTATGGGAAGCCRGTTACTTTGCCTACAGGCTGTATGATGAATGTTGCTAAGTATACTCAGTTATGTCAATATCTGAATACTACAACATTAGCTGTACCTGTTAATATGCGAGTTTTGCAYTTAGGTGCAGGTTCAGAAAAAGGAGTAGCACCRGGTTCTGCAGTTCTTAGGCAGTGGTTGCCTGCTGGTACTATTCTTGTAGATAATGATTTATACCCATTTGTGAGTGACAGTGTCGCTACATATTTTGGKGATTGTATAACCTTACCCTTTGATTGTCAATGGGATTTGATAATTTCTGATATGTATGACCCTATTACTAAGAACATAGGGGAGTACAATGTAAGTAAAGATGGTTTCTTTACATACATTTGTCATATGATTCGCGACAAGTTAGCTCTGGGTGGCAGTGTTGCTATAAAAATAACAGAGTTTTCTTGGAATGCAGAATTATATAAGTTAATGGGGTATTTTGCATTTTGGACGGTTTTCTGCACAAATGCAAACGCTTCTTCTAGTGAAGGGTTTTTAATTGGCATAAATTATTTGGGTAAGCCCAAGGTTGAGATAGATGGAAATGTTATGCATGCCAATTATTTGTTTTGGAGAAATTCCACAGTTTGGAACGGGGGTGCTTATAGCCTGTTTGACATGGCTAAATTCCCGCTTAAGTTGGCTGGTACTGCCGTAATAAATTTAAGAGCAGACCAGATTAATGATATGGTTTATTCCCTTCTTGAAAAGGGTAAACTACTTGTTAGAGATACAAATAAAGAAGTTTTTGTTGGTGACAGTTTGGTTAATGTAATCATGGCAGTCGCTTATGCAGACAAGCCTAATCACTTTATCAATTTTCCACTTACCCAGTTTCAGGGTTTTGTGTTAAATTATAAAGGTTTACAATTTCAACTTCTCGATGAAGGAGTGGATTGTAAAATACAAACAGCGCCTCACATTAGTCTTGCTATGCTGGAYATTCAGCCTGAAGACTACAGAAGTGTTGATGTTGCTATTCAAGAAGTTATTGATGAYATGCATTGGGGTGAGGGCTTTCAGATTAAATTTGAAAACCCCCATATCCTAGGAAGATGCATAGTTTTAGATGTTAAAGGTGTAGAAGAATTGCATGATGATTTAGTTAATTACATTCGTGAYAAAGGTTGTGTTGCTGACCAATCCAGGAAGTGGATTGGACATTGCACCATAGCCCAACTCACTGATGCTGCACTTTCCATTAAGGAAAATGTTGATTTTATAAACAGCATGCAATTCAAYTATAAAATCACTATCAATCCCTCATCACCGGCTAGAMTTGAAATAGTTAAGCTTGGTGCTGAMAAGAAAGATGGTTTTTATGAAACCATAGCTAGCCACTGGATGGGAATTCGTTTTGAATATAATCCACCCACTGATAAGCTAGCTATGATTATGGGTTATTGTTGTTTAGAAGTGGTGCGTAAAGAGCTAGAAGAAGGTGACCTTCCCGAGAATGATGATGATGCTTGGTTTAAGCTATCGTACCATTATGAAAACAATTCTTGGTTCTTTCGACATGTCTACAGGAAAAGTTCTTATTTCCGTAAGTCTTGTCAAAATTTAGATTGTAATTGTTTGGGGTTTTATGAATCTTCAGTTGAAGAAGACATGTTTTTGATACTTTTAATTTCCTTACCAACGGCTTTTGCTGTTATAGGAGATTTAAAGTGTACTACAGTTTCCATTAATGATGTTGACACTGGTGTTCCTTCTATTAGCACTGATACTGTCGATGTTACTAATGGTTTAGGTACTTATTATGTTTTAGATCGTGTGTATTTAAATACTACGTTGTTGCTTAATGGTTAYTACCCTACTTCAGGTTCTACATATCGTAATATGGCACTGAAGGGAACTTTACTATTGAGCACACTATGGTTTAAACCACCTTTTCTTTCTGATTTTACTAATGGTATTTTTGCTAAGGTCAAAAATACCAAGGTTRTTAAAGATGGTGTAATGTATAGTGAGTTTCCTGCTATAACTATAGGTAGTACTTTTGTAAATACATCCTATAGTGTGGTAGTACAACCACATACTACYAWTTTKGRTARTAAATTACAAGGTYTCTTAGAGATYTCTGTTTGCCAGTATACTATGTGCGAGTACCCAAATACGATTTGTAATCCTAATCTGGGTAATCAACGCGTAGAACTATGGCATTGGGATACAGGTGTTGTTTCCTGTTTATATAAGCGTAATTTCACATATGATGTGAATGCTGATTATTTGTATTTYCATTTTTATCAAGAAGGTGGTACTTTTTATGCATATTTTACAGACACTGGTGTTGTTACTAAGTTTCTGTTTAATGTTTATTTAGGCACGGTGCTCTCACATTATTATGTCATGCCTTTGACTTGTAATAGTGCTCTGACTTTAGAATATTGGGTTACACCYCTCACTTCTAAACAATATCTACTAGCTTTCAATCAAGATGGTGTTATTTTTAATGCTGTTGATTGTAAGAGTGATTTTATGAGTGAGATTAAGTGTAAAACACTATCTATAGCACCATCTACTGGTGTTTATGAATTAAACGGTTACACTGTTCAGCCAATTGCAGATGTTTACCGACGTATACCTAATCTTCCCGATTGCAATATTGAGGCTTGGCTTAATGATAAGTCGGTGCCCTCTCCATTAAATTGGGAACGTAAGACCTTTTCAAATTGTAATTTTAATATGAGCAGCCTGATGTCTTTTATTCAGGCAGACTCATTTACTTGTAATAATATTGATGCTGCTAAGATATATGGTATGTGTTTTTCCAGCATAACTATAGATAAGTTTGCAATACCCAATGGTAGGAAGGTTGACCTACAATTGGGTAATTTGGGTTATTTGCAGTCTTTTAACTATAGAATTGATACTACTGCTACAAGTTGTCAGTTGTATTATAATTTACCTGCTGCTAATGTTTCTGTTAGCAGGTTTAATCCTTCTACTTGGAATAGGAGATTTGGTTTTACAGAACAATCTGTTTTTAAGCCTCAACCTGCAGGTGTTTTTACTGATCATGATGTTGTTTATGCACAACATTGTTTTAAAGCTCCCACAAATTTCTGTCCGTGTAAATTGGATGGGTCTTTGTGTGTAGGTAGTGGTTCTGGTATAGATGCTGGTTATAAAAATACTGGTATAGGCACTTGTCCTGCAGGTACTAATTATTTAACTTGCCATAATGCTGCCCAATGTGATTGTTTGTGCACTCCAGACCCCATTACATCTAAAGCTACAGGGCCTTACAAGTGCCCCCAAACTAAATAYTTAGTTGGYATAGGTGAGCACTGTTCGGGTCTTGCTATTAAAAGTGATTATTGTGGAGGTAAYCCTTGTAGTTGCCAACCACAAGCATTTTTGGGTTGGTCTGTTGACTCTTGTTTACAAGGGGATAGGTGTAATATTTTTGCTAATTTTATTTTGCATGATGTTAATAGTGGTACTACTTGTTCTAYTGATTTACAAAAATCAAACACAGACATAATTCTTGGTGTTTGTGTTAATTATGATCTTTATGGTATTACTGGCCAAGGGATTTTTGTTGAGGTTAATGCGACTTATTATAATAGTTGGCAGAACCTTTTATATGATTCTAATGGTAATCTCTATGGTTTTAGAGACTACTTAACAAATAGAACTTTTATGATTCGTAGTTGCTATAGTGGTCGTGTTTCAGCGGCCTTTCATGCTAACTCTTCCGAACCAGCATTGCTATTTCGGAATATCAAATGCAATTACGTTTTTAATAACACTCTTTCACGACAGCTGCAACCTATTAACTATTTTGATAGCTATCTTGGTTGTGTTGTCAATGCTGATAATAGTACTTCTAKTGTTGTTCAAACATGTGATCTCACAGTAGGTAGTGGTTACTGTGTGGATTACTCTACAAAAAGACGAAGTCGTAGATCGATTACCACTGGTTATCGGTTTACTAATTTTGAGCCATTTACTGTTAATTCAGTAAATGATAGTTTAGAACCTGTAGGTGGTTTGTATGAAATTCAAATACCTTCAGAGTTTACTATAGGTAATATGGAGGAGTTTATTCAAACAAGCTCTCCTAAAGTTACTATTGATTGTTCTGCTTTTGTCTGTGGTGATTATGCAGCATGTAAATCACAGTTGGTTGAATATGGTAGCTTCTGTGACAATATTAATGCTATACTCACAGAAGTAAATGAACTACTTGACACTACACAGTTGCAAGTAGCTAATAGTTTAATGAATGGTGTCACTCTTAGCACTAAGCTTAAAGATGGCGTTAATTTCAATGTAGACGACATCAATTTTTCCCCTGTATTAGGTTGTTTAGGAAGCGATTGCAATAAAGTTTCCAGTAGATCTGCTATAGAGGACTTACTTTTTTCTAAAGTAAAGTTATCTGATGTCGGTTTCGTTGAGGCTTATAATAATTGTACTGGAGGTGCCGAAATTAGGGACCTCATTTGTGTGCAAAGTTATAATGGTATCAAGGTGTTGCCTCCACTGCTCTCAGAAAATCAGATCAGTGGATACACTTTGGCTGCCACCTCTGCTAGCCTGTTTCCTCCATGGTCAGCAGCAGCAGGTGTACCATTCTATTTAAATGTTCAGTATCGTATTAATGGTATTGGTGTTACCATGGATGTGCTAAGTCAAAATCAAAAGCTTATTGCTAATGCATTTAACAATGCTCTTGGTGCTATYCAGGAAGGGTTTGATGCTACCAATTCTGCTTTAGTTAAAATTCAAGCTGTTGTTAATGCAAATGCTGAAGCTCTTAATAACTTATTGCAACAACTCTCTAATAGATTTGGTGCTATAAGTTCTTCTTTACAAGAAATTCTATCTAGACTGGATGCTCTTGAAGCGCAAGCTCAGATAGACAGACTTATTAATGGGCGTCTTACCGCTCTTAATGCTTATGTTTCTCAACAGCTTAGTGACTCTACACTAGTAAAGTTTAGTGCAGCACAAGCTATGGAGAAGGTTAATGAATGTGTCAAAAGCCAATCATCYAGGATAAATTTTTGTGGTAATGGTAATCATATTATATCATTAGTGCAGAATGCTCCATATGGTTTGTATTTTATCCACTTTAGCTATGTCCCTACTAAGTATGTCACWGCGAAGGTTAGTCCCGGYCTGTGCATTGCTGGTGRTAGAGGTATAGCCCCTAAGAGTGGTTATTTYGTTAATGTAAATAATACTTGGATGTTCACTGGTAGTGGTTATTACTACCCTGAACCTATAACTGGAAATAATGTTGTTGTTATGAGTACCTGTGCTGTTAATTATACTAAAGCGCCGGATGTAATGCTGAACATTTCAACACCCAACCTCCCTGAYTTTAAGGAAGAGTTGGATCAATGGTTTAAAAACCAAACATCAGTGGCACCAGATTTGTCACTTGATTATATAAATGTTACATTCTTGGACCTACAAGATGAAATGAATAGGTTACAGGAGGCAATAAAAGTTTTAAATCAGAGCTACATCAATCTCAAGGACATTGGTACWTATGAGTATTATGTAAAATGGCCTTGGTATGTATGGCTTTTAATTGGCTTTGCTGGTGTAGCTATGCTTGTTTTACTATTCTTCATATGCTGTTGTACAGGATGTGGGACTAGTTGTTTTAAGAAATGTGGYGGTTGTTGTGATGATTATACTGGACACCAGGAGTTAGTAATTAAAACATCACATGAMGACATGTTTTTGCTTCCTAGATTTGTTCTAGTTAGCTGCATAATTGGTAGCCTAGGTTTTGACAACCCTCCTACCAATGTTGTTTCGCATTTAAATGGAGATTGGTTTTTATTTGGTGACAGTCGTTCAGATTGTAATCATGTTGTTACTACCAACCCCCGTAATTATTCTTATATGGACCTTAATCCTGCCTTGTGTGGTTCTGGTAAAATATCAKCTAAAGCTGGCAACTCCATTTTTAGGAGTTTTCACTTTACYGATTTTTATAATTACACAGGCGAAGGTCAACAAATTATTTTCTATGAGGGTGTTAATTTTACGCCTTATCATGCCTTTAAATGCACCACTTCTGGTAGTAATGATATTTGGATGCAGAATAAAGGCTTGTTTTACACTCAGGTTTATAAGAATATGGCTGTGTATCGCAGCCTTACTTTTGTTAATGTACCATATGTTTATAATGGCTCTGCACAATCTACAGCCCTTTGTAAATCTGGTAGTTTAGTTCTTAATAACCCTGCATATATAGCTCGTGAAGCTAATTTTGGGGATTATTATTATAAGGTTGAAGCTGATTTTTATTTGTCAGGTTGTGACGAGTATATCGTACCACTTTGTATTTTCAACGGCAAGTTTTTGTCGAATACAAAGTATTATGATGATAGTCAATATTATTTTAATAAAGACACTGGTGTTATTTATGGTCTCAATTCTACTGAAACCATTACCACTGGTTTTGACTTTAATTGTCATTATTTAGTTCTACCCTCTGGTAATTATTTAGCCATTTCAAATGAGCTATTGTTAACTGTTCCTACTAAAGCAATCTGTCTTAATAAGCGTAAGGATTTTACGCCTGTACAGGTTGTTGATTCGCGGTGGAACAATGCCAGGCAGTCTGATAACATGACGGCAGTTGCTTGTCAACCCCCGTACTGTTATTTTCGTAATTCTACTACCAATTATGTTGGTGTTTATGATATCAATCATGGGGATGCTGGTTTTACTAGCATACTCAGTGGTTTGTTATATGACTCACCTTGTTTTTCGCAGCAAGGTGTTTTTAGGTATGATAATGTTAGCAGTGTCTGGCCTCTCTACCCCTATGGCAGATGCCCTACTGCTGCTGATATTAATACCCCTGATGTACCTATTTGTGTGTATGATCCGCTACCAATTATTTTGCTTGGCATTCTTTTGGGTGTTGCGGTCATAATTATTGTAGTTTTGTTGTTATATTTTATGGTGGATAATGGTACTAGGCTGCATGATGCTATGTTTATGGCTGATGCTTATTTTGCAGACACTGTGTGGTATGTGGGGCAAATAATTTTTATAGTTGCCATTTGTTTATTGGTTATAATAGTTGTAGTGGCATTTTTGGCAACTTTTAAATTGTGTATTCAACTTTGCGGTATGTGTAATACCTTAGTACTGTCCCCTTCTATTTATGTGTTTAATAGAGGTAGGCAGTTTTATGAGTTTTACAATGATGTAAAACCACCAGTTCTTGATGTGGATGACGTTATGAGTAGTGTAACTACACCAGCACCAGTTTTCACCTGGACTGCTGATGAAGCTATTAAATTCCTAAAGGAATGGAACTTTTCTTTGGGTATTATACTACTTTTTATTACAGTCATATTGCAATTTGGATATACAAGTCGCAGTATGTTTGTTTATGTTATTAAGATGATYATTTTGTGGCTTATGTGGCCCCTTACTATCATCTTAACTATTTTCAATTGCGTGTATGCGTTGAATAATGTGTATCTTGGCTTCTCTATAGTTTTTACTATAGTGGCCATTATCATGTGGATTGTGTATTTTGTGAATAGTATCAGGTTGTTTATTAGAACTGGAAGTTGGTGGAGTTTCAACCCAGAAACAAACAACTTGATGTGTATAGATATGAAGGGAAGGATGTATGTTAGGCCGATAATTGAGGACTAYCATACCCTTACGGTCACAATAATACGTGGTCATCTTTACATGCAAGGTATAAAACTAGGTACTGGCTATTCTTTGTCAGATTTGCCAGCTTATGTGACTGTTGCTAAGGTCTCGCACCTGCTCACGTATAAGCGTGGTTTTCTTGACAAGATAGGCGATACTAGTGGTTTTGCTGTTTATGTTAAGTCCAAAGTCGGTAATTACCGACTGCCATCAACCCAAAAGGGTTCTGGCTTGGACACCGCATTGTTGAGAAATAATATCATGTCTTTTACTCCTGGTAAGCAATCCAGTAGTAGAGCGTCCTCTGGAAATCGTTCTGGTAATGGCATCCTTAAGTGGGCCGATCAGTCCGACCAATCTAGAAATGTTCAAACCAGGGGTAGAAGAGCTCAACCCAAGCAAACTGCTACTTCTCAGCAACCATCAGGAGGGAATGTTGTACCCTACTATTCTTGGTTCTCTGGAATTACTCAGTTTCAAAAGGGAAAGGAGTTTGAATTTGCAGAGGGACAAGGTGTGCCTATTGCACCAGGAGTCCCAGCTACTGAAGCTAARGGGTACTGGTACAGACACAACMGACGTTCCTTTAAAACAGCCGATGGCAACCAGCGTCAATTGCTGCCACGATGGTATTTTTACTATCTTGGAACAGGACCGCATGCCAAAGACCAGTATGGCACCGACATTGACGGAGTCTWCTGGGTCGCTAGTAACCAGGCTGATGTCAATACCCCGGCTGACATTCTCGATCGGGACCCAAGTAGCGATGAGGCTATTCCGACTAGGTTTCCGCCTGGCACGGTACTCCCTCAGGGTTACTATATTGAAGGCTCAGGAAGGTCTGCTCCTAATTCCAGATCTACTTCACGCGCATCCAGTAGAGCCTCTAGTGCAGGATCGCGCAGTAGAGCCAATTCTGGCAATAGAACCCCTACCTCTGGTGTAACACCTGATATGGCTGATCAAATTGCTAGTCTTGTTCTGGCAAAACTTGGCAAGGATGCCACTAAGCCACAGCAAGTAACTAAGCAGACTGCCAARGAAATCAGACAGAAAATTTTGAATAAGCCCCGCCAGAAGAGGAGCCCCAATAAACAATGCACTGTTCAGCAGTGTTTTGGGAAGAGAGGCCCCAATCAGAATTTTGGTGGTGGAGAAATGTTAAAACTTGGAACTAGTGATCCACAGTTCCCCATTCTTGCAGAACTCGCACCCACAGCTGGTGCGTTTTTCTTTGGATCAAGATTAGAGTTGGCCAAAGTGCAGAATTTGTCTGGGAATCTTGACGAGCCCCAGAAGGATGTTTATGAATTGCGCTATAATGGCGCAATTAGATTTGATAGTACACTTTCAGGTTTTGAGACCATAATGAAGGTGTTGAATGAGAATTTGAATGCATACCAACAACAGGATGGTACGATGAATATGAGTCCAAAACCACAGCGTCAGCGTGGTCAGAAGAACGGACAAGGAGAAAATGATAATATAAGTGTTGCAGCGCCCAAAAGCCGTGTGCAGCAAAATAAGATTAGAGAGTTGACTGCAGAGGACATCAGCCTTCTTAAGAAGATGGATGAGCCCTTTACTGAAGAYACCTCAGAAATA
>gi|145208944|gb|EF424620.1|_Bovine_coronavirus_R-AH187_complete_genome
ATGTCGAAGATCAACAAATACGGTCTCGAACTACACTGGGCTCCAGAATTTCCATGGATGTTTGAGGACTCAGAGGAGAAGTTGGACAACCCTAGTAGTTCAGAGGTGGATATAGTATGCTCCACCACTGCGCAAAAGCTGGAAACAGGCGGAATTTGTCCTGAAAATCATGTGATGGTGGATTGTCGCCGACTTCTTAAACAAGAATGTTGTGTGCAGTCTAGCCTAATACGTGAAATTGTTATGAATACACGTCCATATGATTTGGAGGTGCTACTTCAAGATGCTTTGCAGTCCCGCGAAGCAGTTTTGGTTACACCCCCTCTAGGTATGTCTCTGGAGGCATGCTATGTGAGAGGTTGTAATCCTAATGGATGGACCATGGGTTTGTTTCGGCGTAGAAGTGTGTGTAACACTGGTCGCTGCGCTGTTAACAAGCATGTGGCCTATCAGCTATATATGATTGATCCTGCGGGTGTCTGTTTTGGTGCAGGTCAATTTGTGGGTTGGGTTATACCCTTAGCCTTTATGCCTGTGCAATCCCGGAAATTTATTGTTCCTTGGGTTATGTACTTGCGTAAGTGTGGCGAAAAGGGTGCCTACAACAAAGATCATAAACGTGGCGGTTTTGAACACGTTTATAATTTTAAAGTTGAGGATGCTTACGACTTGGTTCATGATGAGCCTAAGGGTAAGTTTTCTAAGAAGGCTTATGCTTTAATTAGAGGATACCGTGGTGTTAAACCGCTTCTTTATGTAGACCAGTATGGTTGTGATTATACTGGTGGTCTTGCAGATGGCTTAGAGGCTTATGCTGATAAGACATTGCAAGAAATGAAGGCATTATTTCCTATTTGGAGCCAGGAACTCCCTTTTGATGTAACTGTGGCATGGCACGTTGTGCGTGATCCACGTTATGTTATGAGACTGCAGAGTGCTTCTACTATACGTAGTGTTGCATATGTTGCTAACCCTACTGAAGACTTGTGTGATGGTTCTGTTGTCATAAAGGAACCTGTGCATGTTTATGCGGATGACTCTATTATTTTACGTCAACATAATTTAGTTGACATTATGAGTTGTTTTTATATGGAGGCAGATGCAGTTGTAAATGCTTTTTATGGTGTTGATTTGAAACATTGTGGTTTTGTTATGCAGTTTGGTTATATTGACTGCGAACAAGACTTGTGTGATTTTAAAGGTTGGGTTCCTGGTAATATGATAGATGGTTTTGCTTGCACTACTTGTGGTCATGTCTATGAGACAGGTAATTTGCTAGCACAATCTTCAGGTGTTCTGCCTGTTAATCCTGTATTGCATACTAAGAGTGCAGCAGGTTATGGTGGTTTTGGTTGTAAGGATTCTTTTACCCTGTATGGCCAAACTGTAGTTTATTTTGGAGGTTGTGTGTATTGGAGTCCAGCACGTAATATATGGATTCCTATATTAAAATCTTCTGTTAAGTCTTATGACGGTTTGGTTTATACTGGAGTTGTAGGTTGCAAGGCTATTGTAAAGGAAACAAATCTCATTTGCAAAGCGTTGTACCTTGATTATGTTCAACACAAGTGTGGCAATTTACACCAGCGGGAGTTGCTAGGTGTGTCAGATGTGTGGCATAAACAATTGTTATTAAATAGAGGTGTGTACAAACCTCTTTTAGAGAATATTGATTATTTTAATATGCGGCGCGCTAAATTTAGTTTAGAAACTTTTACTGTTTGTGCAGATGGTTTTATGCCTTTTCTTTTAGATGATTTGGTTCCGCGCGCATATTATTTGGCAGTAAGTGGTCAAGCATTTTGTGACTACGCAGATAAAATCTGCCATGCTGTTGTGTCTAAGAGTAAAGAGTTACTTGATGTGTCTTTGGATTCTTTAAGTGCAGCTATACATTATTTGAATTCTAAAATTGTTGATTTGGCTCAACATTTTAGTGATTTTGGAACAAGTTTTGTTTCTAAAATTGTTCATTTCTTTAAGACTTTTACTACTAGCACTGCTCTTGCATTTGCATGGGTTTTATTTCATGTTTTGCATGGTGCTTATATAGTAGTAGAGAGTGATATATATTTTGTTAAAAACATTCCTCGTTATGCTAGTGCTGTTGCACAAGCATTTCGGAGTGTTGCTAAAGTTGTACTGGACTCTTTAAGAGTTACTTTTATTGATGGCCTTTCTTGTTTTAAGATTGGACGTAGAAGAATTTGTCTCTCAGGCAGTAAAATTTATGAAGTTGAGCGTGGCTTGTTACATTCATCTCAATTGCCATTAGATGTTTATGATTTAACCATGCCTAGTCAAGTTCAGAAAGCCAAGCAAAAACCTATTTATTTAAAAGGTTCTGGTTCTGATTTTTCATTAGCAGATAGTGTGGTTGAAGTTGTTACAACTTCACTTACACCATGTGGTTATTCTGAACCACCTAAAGTTGCAGATAAAATTTGCATTGTGGATAATGTTTATATGGCCAAGGCTGGTGACAAATATTACCCTGTTGTGGTTGATGGTCATGTAGGACTCTTGGATCAAGCATGGAGGGTTCCTTGTGCTGGAAGGCGTGTTACATTTAAGGAACAGCCTACAGTAAATGAGATTGCAAGCACACCTAAGACTATTAAAGTTTTTTATGAGCTTGACAAAGATTTTAATACTATTTTAAACACTGCATGTGGAGTGTTTGAAGTAGATGATACCGTGGATATGGAGGAATTTTATGCTGTGGTGGTTGATGCCATAGAAGAGAAACTTTCTCCATGTAAGGAGCTTGAAGGTGTAGGTGCTAAAGTTAGTGCCTTTTTACAGAAATTAGAGGATAATTCCCTATTTTTATTTGATGAGGCTGGCGAGGAAGTTCTTGCTTCTAAATTGTATTGTGCTTTTACAGCTCCTGAAGATGATGACTTTCTTGAAGAAAGTGGTGTTGAAGAAGATGATGTAGAAGGTGAGGAAACTGATTTAACTGTCACAAGTGCTGGAGAGCCTTGTGTTGCCAGTGAACAGGAGGAGTCTTCTGAAATCTTAGAGGACACTTTGGATGATGGTCCATGTGTGGAGACATCTGATTCACAAGTTGAAGAAGATGTAGAAATGTCGGATTTTGCTGATCTTGAATCTGTGATTCAGGATTATGAAAATGTTTGTTTTGAGTTTTATACTACAGAGCCAGAATTTGTTAAAGTTTTGGATCTGTATGTGCCTAAAGCAACTCGCAACAATTGCTGGTTGCGATCAGTTTTGGCAGTGATGCAGAAACTGCCCTGTCAATTTAAAGATAAAAATTTGCAGGATCTTTGGGTGTTATATAAGCAACAGTATAGTCAGTTGTTTGTTGATACCTTGGTTAATAAGATACCTGCTAATATTGTAGTTCCACAAGGTGGTTATGTTGCCGATTTTGCATATTGGTTCTTAACCTTATGTGATTGGCAGTGTGTTGCATACTGGAAATGCATTAAATGTGATTTAGCTCTTAAGCTTAAAGGCTTGGATGCTATGTTCTTTTATGGTGATGTTGTCTCACATGTGTGCAAGTGTGGTGAGTCTATGGTACTTATTGATGTTGATGTGCCATTTACAGCCCACTTTGCTCTTAAAGATAAGTTGTTTTGTGCATTTATTACTAAGCGTAGTGTGTACAAAGCAGCTTGTGTTGTGGATGTTAATGATAGTCATTCTATGGCTGTTGTTGATGGTAAACAAATTGATGATCATCGTGTCACTAGTATTACTAGTGATAAGTTTGATTTTATTATTGGGCATGGTATGTCATTTTCAATGACTACTTTCGAAATTGCCCAATTGTATGGTTCTTGTATAACACCTAATGTATGTTTTGTTAAAGGTGATATAATTAAAGTTTCTAAGCGTGTTAAAGCAGAAGTCGTTGTAAATCCTGCTAATGGCCATATGGCACATGGTGGTGGTGTTGCAAAGGCTATTGCAGTAGCAGCTGGACAGCAGTTTGTTAAAGAGACTACCGATATGGTTAAGTCTAAAGGAGTTTGTGCCACTGGAGACTGTTATGTCTCTACAGGGGGTAAATTATGTAAAACTGTGCTTAATGTTGTTGGACCTGATGCGAGAACACAGGGTAAACAAAGTTATGCATTGTTAGAGCGTGTTTATAAACATCTTAACAAATATGATTGTGTTGTTACAACTTTGATATCAGCTGGTATATTTAGTGTGCCTTCTGATGTGTCTTTAACATATCTACTTGGTACTGCCGAGAAACAAGTTGTTCTTGTTAGCAATAATCAAGAGGATTTTGATCTTATTTCTAAGTGTCAGATAACTGCCGTTGAGGGCACTAAGAAATTGGCAGAGCGTCTTTCTTTTAATGTAGGGCGTTCTATCGTTTACGAAACAGATGCTAATAAGTTGATTTTAAGCAATGACGTTGCATTTGTTTCGACATTTAATGTCTTACAGGATGTTTTATCCTTAAGACATGATATAGCACTTGATGATGATGCACGAACCTTTGTTCAGAGCAATGTTGATGTTGTACCTGAGGGTTGGCGTGTTGTCAATAAGTTTTACCAAATTAATGGTGTTAGAACCGTTAAGTATTTTGAGTGTCCCGGTGGCATAGATATATGCAGCCAGGATAAAGTTTTTGGTTATGTACAGCAGGGTAGTTTTAATAAGGCTACTGTTGCTCAAATTAAAGCCTTGTTTTTGGATAAAGTGGACATCTTGCTAACTGTTGATGGTGTCAATTTCACTAACAGGTTTGTGCCTGTAGGTGAAAATTTTGGTAAGAGTCTAGGAAATGTGTTCTGTGATGGAGTTAATGTCACGAAACATAAGTGTGATATAAATTATAAAGGTAAAGTCTTTTTCCAGTTTGATAATCTTTCTAGTGAAGATTTAAAGGCTGTAAGAAGTTCTTTTAATTTTGATCAGAAGGAATTGCTTGCCTACTACAACATGCTTGTTAATTGTTCTAAATGGCAGGTTGTTTTTAATGGTAAGTATTTCACTTTTAAGCAAGCTAATAACAATTGTTTTGTTAATGTTTCTTGCTTAATGCTCCAGAGTTTGAATCTGAAATTTAAAATTGTTCAATGGCAGGAGGCGTGGCTTGAATTTCGTTCTGGTCGCCCTGCTAGATTTGTATCTTTGGTTTTGGCCAAAGGTGGGTTTAAATTTGGTGATCCTGCTGATTCTAGAGATTTCTTGCGTGTTGTGTTTAGTCAAGTTGATTTGACAGGGGCAATATGTGATTTTGAAATTGCATGTAAATGTGGTGTAAAGCAGGAACAGCGTACTGGTGTTGACGCTGTTATGCATTTTGGTACATTGAGTCGTGAAGATCTTGAGATTGGTTACACCGTGGATTGTTCTTGTGGTAAAAAGCTAATCCATTGTGTACGATTTGATGTACCATTTTTAATTTGTAGTAATACACCTGCTAGTGTAAAATTACCTAAGGGTGTAGGAAGTGCAAATATTTTTAAAGGTGATAAGGTTGGTCATTATGTTCATGTTAAGTGTGAACAGTCTTATCATCTTTATGATGCTTCTAATGTTAAGAAGGTTACAGACGTTACTGGCAATTTGTCAGATTGTTTGTATCTTAAAAATTTGAAACAAACTTTTAAATCGGTGTTAACCACCTATTATTTGGATGATGTTAAGAAAATTGAGTATAAACCTGACTTGTCACAATATTATTGTGACGGAGGTAAGTATTATACTCAGCGTATTATTAAAGCCCAATTTAAAACATTTGAGAAAGTAGATGGTGTGTATACTAATTTTAAATTGATAGGACACACCATCTGTGATATTCTTAATGCTAAGTTGGGTTTTGATAGCTCTAAAGAGTTTGTTGAATATAAAGTTACTGAGTGGCCAACAGCTACAGGTGATGTGGTGTTGGCTACTGATGATTTGTATGTTAAGAGATATGAAAGGGGTTGTATTACTTTTGGTAAACCTGTTATATGGTTAAGCCATGAGCAAGCTTCCCTCAATTCTTTAACATATTTTAATAGACCTTTATTGGTTGATGAGAATAAATTTGATGTTTTAAAAGTGGATGATGTTGACGATGGTGGTGATATCTCAGAGAGTGATGCCAAAGAATCCAAAGAAATCAACATTATTAAGTTAAGTGGTGTTAAAAAACCATTTAAGGTTGAAGATAGTGTCATTGTTAATGATGATACTAGTGAAATCAAATATGTTAAGAGTTTGTCTATAGTTGATGTGTATGATATGTGGCTTACAGGTTGTAGGTATGTTGTTAGAACTGCTAATGATTTGAGCATGGCAGTTAACGTACCTACAATACGTAAGTTTATAAAATTTGGTATGACTCTTGTTAGTATACCAATTGATTTGTTAAATTTAAGAGAGATTAAGCCTGTTTTTAATGTGGTTAAAGCTGTGCGAAATAAAATTTCTGCATGCTTTAATTTTATTAAATGGCTTTTTGTCTTATTATTTGGCTGGATCAAAATATCCGCTGATAATAAAGTAATTTACACCACAGAAGTTGCATCAAAGCTTACATGTAAGCTTGTAGCTTTAGCTTTTAAAAATGCGTTTTTGACATTTAAGTGGAGTGTGGTTGCTAGAGGTGCTTGCATTATAGCGACTATATTTCTATTGTGGTTTAATTTTATATATGCCAATGTAATTTTTAGTGATTTTTATTTGCCTAAAATTGGTTTCTTGCCGACTTTTGTTGGTAAGATCGCACAGTGGATTAAGAGCACTTTTAGTCTTGTAACTATTTGTGATCTATATTCCATTCAGGATGTGGGTTTTAAGAATCAGTATTGTAATGGAAGTATCGCATGTCAATTCTGCTTGGCAGGATTTGATATGTTAGATAATTATAAAGCCATTGATGTAGTACAGTATGAAGCTGATAGGAGAGCATTTGTTGATTATACAGGTGTGTTAAAGATTGTCATTGAATTGATAGTTAGTTACGCCCTGTATACGGCATGGTTCTACCCATTGTTTGCTCTTATTAGTATTCAGATCTTGACCACTTGGCTGCCTGAGCTTTTTATGCTTAGTACATTACATTGGAGTGTTAGGTTGCTGGTGTCTTTAGCTAATATGTTACCAGCACATGTGTTTATGAGGTTCTATATTATTATTGCCTCTTTTATTAAGCTGTTTAGCTTGTTTAGGCATGTTGCCTATGGTTGTAGTAAACCTGGTTGTTTGTTTTGTTACAAGAGGAATCGTAGTCTACGTGTTAAATGTAGTACTATTGTTGGTGGCATGATACGCTATTACGATGTTATGGCTAATGGTGGCACTGGCTTTTGTTCAAAACATCAATGGAATTGCATTGATTGTGATTCTTATAAACCAGGTAATACTTTTATTACTGTTGAGGCCGCTCTTGATTTATCTAAGGAATTGAAACGGCCTATTCAGCCTACAGATGTTGCTTATCATACGGTTACGGATGTTAAGCAAGTTGGTTGTTATATGCGCTTGTTCTATGAGCGTGATGGACAGCGCACATATGATGATGTTAATGCTAGTTTGTTTGTGGATTATAGTAATTTGCTACATTCTAAGGTTAAGGGTGTGCCTAATATGCATGTTGTGGTAGTGGAAAATGATGCCGATAAAGCTAATTTTCTTAATGCTGCTGTATTTTATGCACAGTCTTTGTTTAGACCTATTTTAATGGTTGATAAAAATCTGATAACTACTGCTAATACTGGTACGTCTGTTACAGAAACTATGTTTGATGTTTATGTGGACACATTTTTGTCTATGTTTGATGTGGATAAAAAGAGTCTTAATGCTTTAATAGCAACTGCGCATTCTTCTATAAAACAGGGTACGCAGATTTGTAAAGTTTTGGATACCTTTTTAAGCTGTGCTCGTAAAAGTTGTTCTATTGATTCAGATGTTGATACTAAGTGTTTAGCTGATTCTGTCATGTCTGCTGTATCGGCAGGCCTTGAATTGACGGATGAAAGTTGTAATAACTTGGTGCCAACATATTTGAAGGGTGATAACATTGTGGCAGCAGATTTAGGTGTTCTGATTCAAAATTCTGCTAAGCATGTGCAGGGTAATGTTGCTAAAATAGCCGGTGTTTCCTGTATATGGTCTGTGGATGCTTTTAATCAGCTAAGTTCTGATTTCCAGCATAAATTGAAGAAAGCATGTTGTAAAACTGGTTTGAAATTGAAGCTTACTTATAATAAGCAGATGGCTAATGTCTCTGTTTTAACTACACCCTTTAGTCTTAAAGGGGGTGCAGTTTTTAGTTATTTTGTTTATGTATGTTTTCTGTTGAGTTTGGTTTGTTTTATTGGATTGTGGTGCTTAATGCCCACTTACACAGTACACAAATCAGATTTTCAGCTTCCCGTTTATACCAGTTATAAAGTTTTAGATAATGGTGTTATTAGAGATGTTAGCGTTGAAGATGTTTGTTTCGCTAACAAATTTGAACAATTTGATCAATGGTATGAGTCTACATTTGGTCTAAGTTATTATAGTAACAGTATGGCTTGTCCCATTGTTGTTGCTGTAGTAGACCAGGATCTTGGCTCTACTGTGTTTAATGTCCCTACCAAAGTGTTACGATATGGTTACCATGTGTTGCACTTTATTACACATGCACTTTCTGCTGATGGAGTGCAGTGTTATACGCCACATAGTCAAATATCGTATTCTAATTTTTATGCTAGTGGCTGTGTGCTTTCCTCCGCTTGTACTATGTTTGCAATGGCCGATGGTAGTCCACAACCTTATTGTTATACAGAGGGGCTTATGCAGAATGCTTCTCTGTATAGTTCATTGGTACCTCACGTGCGGTATAATCTTGCTAATGCTAAAGGTTTTATCCGTTTTCCAGAAGTGTTGCGAGAAGGACTTGTGCGTATTGTGCGTACTCGTTCTATGTCGTATTGCAGAGTTGGATTATGTGAGGAAGCTGATGAGGGTATATGCTTTAACTTTAATGGTTCTTGGGTGCTTAATAATGATTATTATAGATCATTGCCTGGGACCTTTTGTGGTAGAGATGTTTTTGACTTAATTTATCAGCTTTTTAAAGGTTTAGCACAGCCTGTGGATTTCTTGGCATTGACTGCTAGTTCTATTGCTGGTGCTATACTTGCTGTAATTGTTGTTTTGGTGTTTTATTACTTAATAAAGCTTAAACGTGCTTTTGGTGATTACACCAGTATTGTTTTTGTCAATGTGATTGTGTGGTGTGTAAATTTTATGATGCTTTTTGTGTTTCAAGTTTACCCTACACTTTCTTGTGTATATGCTATTTGTTATTTTTATGCCACGCTTTATTTCCCTTCGGAGATAAGTGTGATAATGCATTTACAATGGCTAGTTATGTATGGCACTATTATGCCTTTATGGTTTTGTTTGCTATATATATCTGTTGTTGTTTCAAATCATGCTTTTTGGGTATTTGCTTACTGCAGACGGCTTGGTACTTCTGTTCGTAGTGATGGTACATTTGAAGAAATGGCTCTTACTACTTTTATGATTACAAAAGATTCTTATTGTAAGCTTAAGAATTCTTTGTCTGATGTTGCTTTTAATAGATATTTGAGTTTGTATAATAAATATAGGTATTACAGCGGTAAAATGGATACTGCTGCATATAGGGAGGCTGCTTGTTCTCAGTTGGCTAAAGCAATGGATACATTTACCAATAATAATGGTAGTGATGTGCTTTACCAACCACCTACTGCTTCCGTTTCAACTTCATTCTTGCAATCTGGTATTGTGAAAATGGTTAATCCTACTTCTAAGGTAGAACCATGTATTGTCAGTGTTACCTATGGTAATATGACATTGAATGGTTTATGGTTGGATGATAAGGTCTACTGTCCCAGACATGTGATATGTTCTGCTTCAGATATGACTAATCCAGATTATACAAATTTGTTGTGTAGAGTAACATCAAGTGATTTTACTGTATTGTTTGATCGTTTAAGCCTTACAGTGATGTCTTATCAAATGCAGGGTTGTATGCTTGTTCTTACAGTGACCCTGCAAAATTCTCGTACGCCAAAATATACATTTGGTGTGGTTAAACCTGGTGAGACTTTTACTGTTTTAGCTGCTTATAACGGCAAACCACAAGGAGCCTTTCATGTGACTATGCGTAGTAGTTATACCATTAAGGGTTCCTTTTTGTGCGGATCTTGTGGATCTGTTGGTTATGTGCTAATGGGTGATTGTGTTAAATTTGTGTATATGCATCAATTGGAGCTTAGTACTGGTTGTCATACTGGTACTGATTTCAATGGGGATTTTTATGGTCCTTATAAGGATGCTCAGGTTGTCCAATTGCCCGTTCAGGATTATATACAATCTGTTAATTTTGTAGCATGGCTTTATGCTGCTATACTTAATAATTGTAATTGGTTTGTACAAAGTGATAAGTGTTCTGTTGAAGATTTTAATGTGTGGGCTTTGTCTAATGGGTTTAGCCAAGTTAAGTCTGATCTTGTTATAGATGCTTTAGCTTCTATGACTGGTGTGTCTTTGGAAACACTATTGGCTGCTATTAAGCGTCTCAAGAATGGTTTTCAAGGACGTCAGATTATGGGTAGTTGCTCCTTTGAGGATGAATTGACACCTAGCGATGTTTATCAACAACTCGCTGGTATCAAGTTACAATCAAAGCGTACTAGATTGGTTAAAGGCATTGTTTGTTGGATTATGGCTTCTACATTTTTGTTTAGTTGTATAATTACAGCATTTGTGAAATGGACTATGTTTATGTATGTAACTACTAATATGCTTAGTATTACGTTTTGTGCACTTTGTGTTATAAGTTTGGCCATGTTGTTGGTTAAACATAAGCATCTTTATTTGACTATGTATATAATTCCTGTGCTTTTTACACTGCTGTATAACAACTATTTGGTTGTGTACAAGCAGACATTTAGAGGCTATGTTTATGCATGGCTATCATATTATGTTCCATCAGTTGAGTATACTTATACTGATGAAGTTATTTATGGCATGTTATTGCTTATAGGAATGGTCTTTGTTACATTACGTAGCATTAACCATGATTTGTTCTCTTTTATAATGTTTGTTGGCCGTGTGATTTCTGTTGTCTCTTTGTGGTACATGGGTTCTAACTTAGAGGAAGAAATTCTTCTTATGTTGGCTTCTCTTTTTGGTACTTACACATGGACAACAGCTTTATCTATGGCTGCAGCAAAGGTTATTGCTAAGTGGGTTGCTGTGAATGTTTTGTATTTCACAGATATACCTCAAATTAAGATAGTGCTTGTATGCTATTTGTTTATAGGTTATATTATTAGCTGTTATTGGGGTTTGTTTTCCTTGATGAACAGTTTGTTTAGAATGCCTTTGGGTGTTTATAATTATAAAATTTCAGTACAGGAATTAAGATATATGAATGCTAATGGATTGCGCCCTCCTAAGAATAGTTTTGAAGCCCTTATGCTTAATTTTAAGCTTTTGGGTATTGGAGGTGTGCCAATTATTGAAGTATCTCAATTTCAATCAAAATTGACTGATGTTAAATGTGCTAATGTTGTCTTGCTTAATTGCTTGCAACATTTGCATGTTGCTTCTAACTCTAAGTTGTGGCAGTATTGTAGCACTTTGCACAATGAAATACTTGCCACTTCTGATCTGGGTGTTGCTTTTGAAAAGCTTGCTCAGTTGTTAATTGTTTTGTTTGCTAATCCAGCTGCTGTGGATAGCAAGTGCCTGACTAGTATTGAAGAAGTTTGCGACGATTACGCAAAGGACAATACTGTTTTGCAGGCTTTACAGAGTGAATTTGTTAATATGGCTAGCTTCGTTGAATATGAAGTTGCTAAGAAAAATCTTGATGAGGCGCGTTCTAGTGGTTCTGCTAATCAACAGCAGTTAAAACAGCTAGAGAAAGCCTGTAATATTGCTAAATCTGCTTATGAACGCGACCGTGCTGTAGCAAGAAAGTTGGAGCGTATGGCAGATTTGGCTCTCACTAATATGTATAAAGAAGCTAGAATTAATGATAAGAAGAGTAAGGTTGTTTCTGCCTTGCAAACTATGCTTTTTAGTATGGTGCGTAAGTTAGATAATCAAGCTCTGAATTCAATATTAGATAATGCTGTGAAGGGTTGTGTACCATTGAATGCAATCCCTTCATTGGCTGCAAATACTCTGACTATAATTGTACCAGATAAAAGTGTTTACGATCAGGTAGTTGACAATGTCTATGTTACCTATGCGGGTAATGTATGGCAGATTCAAACTATCCAAGATTCAGATGGTACAAATAAGCAGTTGAATGAGATATCTGATGATTGTAACTGGCCACTAGTTATTATTGCAAATCGGCATAATGAGGTATCTGCAACCGTTTTGCAAAATAATGAATTAATGCCTGCTAAGTTGAAAACTCAGGTCGTTAATAGTGGTCCAGATCAGACTTGTAACACACCTACTCAATGTTACTATAATAATAGTAACAATGGGAAGATTGTTTATGCTATACTTAGTGATGTTGATGGTCTTAAGTATACAAAGATTCTTAAAGATGATGGCAATTTTGTTGTTTTGGAGTTAGATCCTCCTTGTAAATTTACTGTTCAAGATGTTAAAGGTCTTAAAATTAAGTACCTTTATTTTGTAAAAGGTTGTAACACACTAGCAAGAGGCTGGGTTGTTGGTACAATTTCTTCTACAGTTAGATTGCAAGCTGGAACTGCTACTGAGTATGCTTCCAACTCATCTATATTATCTTTATGTGCGTTTTCTGTAGATCCTAAGAAAACGTATTTAGATTTTATACAGCAGGGAGGAACACCTATTGCTAATTGTGTTAAAATGTTGTGTGACCATGCTGGTACCGGTATGGCCATTACTGTTAAACCCGATGCTACCACTAATCAGGATTCATATGGTGGTGCGTCTGTTTGTATATATTGCCGCGCACGAGTTGAACACCCAGATGTTGATGGGTTGTGCAAATTACGCGGCAAGTTTGTACAAGTGCCTGTAGGTATAAAAGATCCTGTGTCTTATGTTTTGACACATGATGTTTGTCAAGTTTGTGGATTTTGGCGGGATGGAAGTTGTTCATGTGTTAGCACTGACACTACTGTTCAGTCAAAAGATACTAATTTTTTAAACCGGGGTACGAGTGTAGATGCCCGTCTCGTACCCTGTGCCAGTGGTTTATCTACTGATGTACAATTAAGGGCATTTGATATTTGCAATGCTAGTGTTGCTGGCATTGGTTTACATTTAAAAGTTAATTGCTGCCGTTTTCAGCGTGTTGATGAGAACGGTGATAAATTAGATCAGTTCTTTGTTGTTAAGAGGACAGATCTGACTATATATAATAGAGAGATGGAATGCTATGAGCGTGTAAAAGATTGTAAGTTTGTGGCTGAACACGATTTCTTTACATTTGATGTAGAAGGTAGTCGTGTGCCACATATTGTACGCAAGGATTTAACAAAGTATACTATGTTGGATCTTTGCTATGCGTTGCGACATTTTGATCGCAATGATTGCATGCTGCTTTGTGACATTCTCTCTATATATGCTGGTTGTGAACAATCCTACTTTACTAAGAAGGATTGGTATGATTTTGTTGAAAATCCTGATATTATTAATGTTTATAAAAAGCTAGGACCTATTTTTAATAGAGCCCTAGTTAGCGCTACTGAGTTTGCAGACAAATTGGTGGAGGTAGGCTTAGTAGGCATTTTAACACTTGATAACCAAGATTTAAATGGTAAATGGTATGATTTTGGTGACTATGTTATTGCAGCCCCAGGTTGTGGTGTTGCTATAGCAGACTCTTATTATTCTTATATGATGCCTATGCTGACCATGTGTCATGCATTGGATTGTGAATTGTATGTGAATAATGCTTATAGACTATTTGATCTTGTACAGTATGATTTTACTGATTACAAGCTCGAATTGTTTAATAAGTATTTTAAGCACTGGAGTATGCCATACCATCCTAACACGGTTGATTGTCAGGATGATCGGTGTATCATACATTGTGCTAATTTTAACATACTTTTTAGTATGGTTTTACCTAATACATGTTTTGGGCCTCTTGTTAGGCAAATTTTTGTGGATGGTGTTCCTTTTGTTGTTTCAATTGGATACCATTATAAAGAACTTGGTATTGTGATGAATATGGATGTGGATACACATCGTTATCGCTTGTCTTTAAAAGACTTGCTTTTATATGCTGCTGATCCAGCTTTGCATGTAGCTTCTGCTAGTGCATTGTATGATTTACGCACTTGCTGTTTTAGTGTTGCGGCTATAACAAGCGGTGTAAAATTTCAAACAGTTAAACCTGGTAATTTTAATCAGGATTTTTATGATTTTATTTTAAGTAAGGGCCTGCTTAAAGAGGGTAGTTCAGTTGATCTGAAGCACTTTTTCTTTACGCAGGATGGTAATGCTGCTATTACTGATTATAATTATTATAAGTACAATTTGCCCACCATGGTGGACATTAAGCAGTTGTTGTTTGTTTTGGAAGTTGTTTATAAGTATTTTGAGATCTATGATGGTGGGTGTATACCGGCATCACAAGTCATTGTTAATAATTATGATAAGAGTGCTGGCTATCCATTTAATAAATTTGGAAAAGCCAGGCTCTATTATGAAGCATTATCATTTGAGGAGCAGGATGAAATTTACGCCTATACTAAGCGCAATGTCCTGCCAACACTTACTCAAATGAATTTGAAATATGCTATTAGTGCTAAGAATAGAGCCCGCACTGTTGCTGGTGTTTCCATACTTAGTACTATGACTGGCAGAATGTTTCATCAAAAGTGTTTGAAAAGTATAGCAGCTACACGTGGTGTTCCTGTTGTTATAGGCACCACTAAATTTTATGGCGGCTGGGACGATATGTTACGTCGCCTTATTAAAGATGTTGATAATCCTGTACTTATGGGTTGGGATTATCCTAAGTGTGATCGGGCTATGCCAAACATACTACGTATTGTTAGTAGTCTGGTTTTGGCTCGAAAACATGAGGCATGTTGTTCGCAAAGCGATAGGTTTTATCGACTTGCGAATGAATGCGCACAAGTTCTGAGTGAAATTGTTATGTGTGGTGGCTGTTATTATGTTAAGCCTGGTGGCACTAGTAGTGGTGATGCAACTACTGCTTTTGCTAATTCAGTTTTTAACATATGTCAAGCTGTTTCAGCCAATGTATGTGCTTTAATGTCATGCAATGGTAATAAGATTGAAGATTTGAGTATACGTGCTCTTCAGAAGCGCTTATACTCACATGTGTATAGAAGTGATATGGTTGATTCAACCTTTGTCACAGAATATTATGAATTTTTAAATAAGCATTTTAGTATGATGATTTTGAGTGATGATGGCGTTGTGTGTTATAATTCTGATTATGCGTCCAAAGGGTATATTGCTAATATAAGTGCCTTTCAACAGGTATTGTATTATCAAAATAACGTTTTTATGTCAGAATCCAAATGTTGGGTTGAAAATGACATAAACAATGGACCTCATGAATTCTGTTCACAACACACAATGCTTGTAAAGATGGATGGGGACGATGTCTATCTTCCATATCCTGATCCTAGTCGTATATTAGGAGCTGGATGTTTTGTAGATGATTTGTTAAAGACTGATAGTGTTCTTTTAATAGAACGATTTGTAAGTCTTGCAATAGATGCTTATCCACTTGTGTACCACGAAAATGAAGAATACCAAAAGGTTTTTCGTGTTTATTTGGAGTATATAAAGAAGTTGTACAATGACCTGGGTAATCAGATCTTGGATAGCTACAGTGTTATTTTAAGTACTTGTGATGGACAAAAGTTTACTGATGAGTCCTTTTACAAGAACATGTATTTAAGAAGTGCAGTTATGCAGAGTGTTGGAGCTTGCGTGGTCTGCTCTTCTCAAACATCATTACGTTGTGGCAGTTGCATCAGAAAGCCTCTTCTTTGCTGCAAGTGTTGTTACGATCACGTTATGGCAACTGATCATAAATATGTTTTGAGTGTTTCACCATATGTGTGTAACGCACCAGGATGTGATGTAAATGATGTTACCAAATTGTATCTAGGTGGTATGTCATATTATTGTGAAGATCATAAGCCACAATATTCGTTTAAGTTGGTAATGAATGGTATGGTTTTTGGTCTATATAAACAATCTTGTACAGGATCTCCGTACATAGATGATTTTAATCGTATAGCTAGTTGTAAATGGACTGATGTTGATGATTACATACTGGCTAATGAATGTACAGAGCGCTTGAAATTGTTTGCTGCAGAAACGCAAAAGGCGACTGAGGAAGCCTTTAAGCAGAGTTATGCATCAGCAACAATACAAGAGATTGTTAGCGAGCGCGAATTGATCCTCTCTTGGGAGATTGGAAAAGTGAAGCCACCACTTAATAAAAATTATGTTTTTACTGGCTACCATTTTACTAAAAATGGCAAGACAGTTTTAGGTGAGTATGTTTTTGATAAGAGTGAGTTGACTAATGGTGTGTATTATCGCGCCACAACCACTTATAAGCTATCTGTAGGAGATGTTTTTGTTTTAACCTCTCATTCAGTAGCTAATTTAAGTGCTCCTACGCTGGTGCCGCAGGAGAATTATAGTAGTATTAGATTCGCTAGTGTTTATAGTGTGCTTGAGACGTTTCAGAACAATGTCGTTAATTATCAACACATTGGTATGAAACGTTATTGCACCGTGCAAGGACCTCCTGGTACAGGAAAGTCACATCTTGCTATTGGTCTTGCTGTTTATTATTGTACAGCACGTGTAGTATACACTGCGGCTAGCCATGCAGCTGTTGACGCATTGTGTGAAAAAGCATACAAATTTTTGAATATAAATGACTGCACTCGTATTGTTCCTGCCAAGGTCAGGGTGGAGTGCTATGATAAGTTTAAAATTAATGACACCACTCGTAAGTATGTGTTTACTACTATAAATGCATTACCTGAGATGGTGACTGATATTGTTGTTGTAGATGAAGTTAGTATGCTTACCAATTATGAGCTTTCTGTTATTAATGCTCGTATTCGTGCTAAGCATTATGTTTACATTGGTGATCCTGCTCAATTGCCAGCACCACGTGTGTTATTGAGCAAGGGTACACTTGAACCTAAATATTTTAACACTGTTACTAAGCTTATGTGTTGCTTAGGGCCAGACATTTTTCTTGGTACATGTTATAGATGTCCTAAGGAAATTGTTGATACAGTGTCTGCCTTGGTTTATGAAAATAAGCTTAAGGCTAAGAATGAAAGTAGTTCATTGTGTTTTAAGGTCTATTATAAAGGCGTTACAACACATGAAAGTTCTAGTGCTGTAAATATGCAGCAGATTTATTTGATTAATAAGTTTTTGAAGGCTAACCCTTTGTGGCATAAAGCCGTTTTTATTAGCCCATATAATAGCCAGAACTTTGCAGCTAAGCGTGTTTTGGGTTTGCAAACCCAGACCGTGGATTCTGCTCAAGGTTCTGAATATGATTATGTTATATATTCACAGACTGCAGAAACAGCGCATTCTGTAAATGTTAATCGCTTCAATGTTGCTATTACTCGAGCCAAGAAAGGTATTCTTTGTGTTATGAGTAATATGCAGTTGTTTGAAGCATTACAGTTTACTACATTGACCTTAGATAAAGTGCCACAGGCCGTTGAAACGAGAGTTCAATGTAGTACCAATTTATTTAAAGATTGTAGCAAGAGTTATAGTGGTTACCACCCAGCTCACGCTCCTTCATTTTTGGCAGTAGATGACAAATATAAGGCAACTGGCGATTTAGCCGTGTGTCTTGGTATTGGAGATTCTGCTGTTACATATTCAAGATTAATATCACTCATGGGTTTTAAACTTGATGTCACCCTTGATGGGTATTGTAAGCTTTTTATAACTAAAGAAGAAGCTGTTAAACGCGTGCGTGCTTGGGTTGGCTTTGATGCTGAAGGCGCTCATGCCACGCGTGATAGCATTGGGACAAATTTCCCACTTCAATTAGGGTTTTCTACAGGAATTGATTTTGTTGTGGAAGCCACTGGTTTGTTTGCTGATAGAGATGGTTACAGCTTTAAAAAGGCTGTGGCTAAAGCTCCTCCTGGTGAACAATTTAAGCATCTCATCCCTTTGATGACGAGAGGTCAGCGCTGGGATGTTGTTAGACCTAGAATAGTACAAATGTTTGCAGATCATTTAATTGATCTGTCTGATTGTGTTGTGCTAGTTACATGGGCAGCCAACTTTGAGCTCACTTGTCTCCGATACTTTGCAAAAGTAGGTCGTGAGATCTCTTGTAATGTGTGCACTAAACGTGCCACAGCTTACAATTCTAGAACTGGTTACTATGGTTGTTGGCGCCATAGTGTTACATGTGATTACTTGTATAATCCACTTATTGTTGATATTCAACAGTGGGGATATATTGGATCTTTATCAAGTAATCATGATTTATATTGTAGTGTCCACAAAGGAGCACATGTTGCTTCATCTGATGCTATAATGACACGGTGTTTGGCCGTTTATGATTGTTTTTGCAATAATATTAATTGGAATGTGGAGTATCCCATTATTTCAAATGAGTTAAGTATTAATACCTCTTGTAGGGTCTTGCAGCGTGTTATGCTTAAAGCTGCAATGCTCTGCAACAGATATACTTTGTGTTATGATATTGGCAACCCAAAAGCGATTGCCTGTGTCAAAGATTTTGATTTTAAGTTCTATGATGCCCAACCAATTGTTAAGTCTGTCAAGACTCTTTTGTATTCTTTTGAGGCACATAAGGACTCTTTTAAAGATGGTTTGTGTATGTTTTGGAACTGTAATGTGGATAAGTATCCACCGAATGCAGTTGTATGTAGATTTGACACGAGAGTGTTGAATAATTTAAATCTTCCTGGCTGTAATGGAGGTAGTTTGTATGTTAATAAACATGCATTCCACACTAAACCCTTTTCTAGGGCAGCCTTTGAGCATTTGAAGCCTATGCCATTTTTCTATTATTCAGATACGCCTTGCGTGTATATGGATGGCATGGATGCTAAGCAGGTTGATTATGTACCTTTGAAATCCGCCACTTGCATCACAAGATGCAATTTAGGTGGTGCAGTTTGTTTAAAACATGCTGAAGAGTATCGTGAGTACCTAGAGTCTTACAATACAGCTACTACAGCAGGTTTTACTTTTTGGGTCTATAAGACATTTGATTTTTATAATTTGTGGAATACGTTCACCAAGCTACAAAGCTTGGAGAATGTTGTATATAATTTAGTCAAAACTGGTCATTATACAGGACAGGCTGGTGAAATGCCTTGTGCCATTATAAATGATAAAGTTGTGGCTAAGATCGATAAGGAGGATGTTGTCATTTTTATTAATAATACAACATACCCTACTAATGTGGCTGTCGAATTATTTGCCAAGCGCAGTATTCGACACCATCCAGAGCTTAAGCTCTTTAGAAATTTGAATATAGACGTGTGTTGGAAGCACGTCATTTGGGATTATGCTAGAGAAAGTATATTTTGCAGTAATACCTATGGTGTCTGCATGTATACAGATTTAAAGTTCATTGATAAATTGAATGTCCTTTTTGATGGTCGTGATAATGGTGCTCTTGAAGCTTTTAAACGCTCTAATAATGGCGTTTACATTTCCACGACAAAAGTTAAGAGTCTTTCGATGATAAAAGGTCCACCGCGTGCTGAATTAAATGGCGTAGTGGTGGACAAGGTTGGAGACACTGATTGTGTGTTTTATTTTGCTGTGCGTAAAGAGGGTCAGGATGTCATCTTCAGCCAATTCGACAGCCTGAGAGTCAGCTCTAACCAGAGCCCACAAGGTAATCTGGGGAGTAATGAACCCGGTAATGTCGGTGGTAATGATGCTCTGGCAACCTCCACTATCTTTACACAAAGCCGTGTTATTAGCTCTTTTACATGTCGTACTGATATGGAAAAAGATTTTATAGCTTTAGATCAAGACTTGTTTATTCAGAAGTATGGTTTGGAGGACTATGCCTTTGAACACATTGTTTATGGTAATTTCAACCAGAAGATTATTGGTGGTTTGCATTTGTTAATAGGCTTGTACCGAAGACAGCAAACTTCCAATCTGGTTATTCAGGAGTTTGTTTCATACGACTCCAGCATACACTCTTATTTTATCACTGATGAGAAGAGTGGTGGTAGTAAGAGTGTTTGCACTGTTATAGATATTTTGTTGGATGATTTTGTGGCTCTTGTTAAGTCACTTAATCTCAACTGTGTGAGTAAGGTTGTTAACGTTAATGTTGATTTTAAAGATTTTCAGTTCATGCTTTGGTGTAACGATGAGAAAGTTATGACTTTCTATCCTCGTTTGCAAGCTGCATCTGACTGGAAGCCTGGTTATTCTATGCCTGTATTATACAAGTATTTGAATTCCCCAATGGAAAGAGTTAGTCTCTGGAATTATGGGAAGCCGGTTACTTTGCCTACAGGCTGTATGATGAATGTTGCTAAGTATACTCAGTTATGTCAATATCTGAATACTACAACATTAGCTGTACCTGTTAATATGCGAGTTTTGCATTTAGGTGCAGGTTCAGAAAAAGGAGTAGCACCGGGTTCTGCAGTTCTTAGGCAGTGGTTGCCTGCTGGTACTATTCTTGTAGATAATGATTTATACCCATTTGTGAGTGACAGTGTCGCTACATATTTTGGGGATTGTATAACCTTACCCTTTGATTGTCAATGGGATTTGATAATTTCTGATATGTATGACCCTATTACTAAGAACATAGGGGAGTACAATGTAAGTAAAGATGGTTTCTTTACATACATTTGTCATATGATTCGCGACAAGTTAGCTCTGGGTGGCAGTGTTGCTATAAAAATAACAGAGTTTTCTTGGAATGCAGAATTATATAAGTTAATGGGGTATTTTGCATTTTGGACGGTTTTCTGCACAAATGCAAACGCTTCTTCTAGTGAAGGGTTTTTAATTGGCATAAATTATTTGGGTAAGCCCAAAGTTGAGATAGATGGAAATGTTATGCATGCCAATTATTTGTTTTGGAGAAATTCCACAGTTTGGAACGGGGGTGCTTATAGCCTGTTTGACATGGCTAAATTCCCGCTTAAGTTGGCTGGTACTGCCGTAATAAATTTAAGAGCAGACCAGATTAATGATATGGTTTATTCCCTTCTTGAAAAGGGTAAACTACTTGTTAGAGATACAAATAAAGAAGTTTTTGTTGGTGACAGTTTGGTTAATGTAATCATGGCAGTCGCTTATGCAGACAAGCCTAATCACTTTATCAATTTTCCACTTACCCAGTTTCAGGGCTTTGTGTTAAATTATAAAGGTTTACAATTTCAACTTCTCGATGAAGGAGTGGATTGTAAAATACAAACAGCGCCTCACATTAGTCTTGCTATGCTGGATATTCAGCCTGAAGACTACAGAAGTGTTGATGTTGCTATTCAAGAAGTTATTGATGATATGCATTGGGGTGAGGGCTTTCAGATTAAATTTGAAAACCCCCATATCCTAGGAAGATGCATAGTTTTAGATGTTAAAGGTGTAGAAGAATTGCATGATGATTTAGTTAATTACATTCGTGATAAAGGTTGTGTTGCTGACCAATCCAGGAAGTGGATTGGACATTGCACCATAGCCCAACTCACTGATGCTGCACTTTCCATTAAGGAAAATGTTGATTTTATAAACAGCATGCAATTCAACTATAAAATCACTATCAATCCCTCATCACCGGCTAGACTTGAAATAGTTAAGCTTGGTGCTGAAAAGAAAGATGGTTTTTATGAAACCATAGCTAGCCACTGGATGGGAATTCGTTTTGAATATAATCCACCCACTGATAAGCTAGCTATGATTATGGGTTATTGTTGTTTAGAAGTGGTGCGTAAAGAGCTAGAAGAAGGTGACCTTCCCGAGAATGATGATGATGCTTGGTTTAAGCTATCGTACCATTATGAAAACAATTCTTGGTTCTTTCGACATGTCTACAGGAAAAGTTCTTATTTCCGTAAGTCTTGTCAAAATTTAGATTGTAATTGTTTGGGGTTTTATGAATCTTCAGTTGAAGAAGACATGTTTTTGATACTTTTAATTTCCTTACCAACGGCTTTTGCTGTTATAGGAGATTTAAAGTGTACTACACTTTCCATTAATGATGTTGACACTGGTGTTCCTTCTATTAGCACTGATACTGTCGATGTTACTAATGGTTTAGGTACTTATTATGTTTTAGATCGTGTGTATTTAAATACTACGTTGTTGCTTAATGGTTATTACCCTACTTCAGGTTCTACATATCGTAATATGGCACTGAAGGGAACTTTACTACTGAGCACACTGTGGTTTAAACCACCTTTTCTTTCTGATTTTACTAATGGTATTTTTGCTAAGGTCAAAAATACCAAGGTTATTAAAGATGGTGTAATGTATAGTGAGTTTCCTGCTATAACTATAGGTAGTACTTTTGTAAATACATCCTATAGTGTGGTAGTACAACCACATACTACCATTTTGGGTAATAAATTACAAGGTTTCTTAGAGATCTCTGTTTGCCAGTATACTATGTGCGAGTACCCAAATACGATTTGTAATCCTAATCTGGGTAATCAACGCGTAGAACTATGGCATTGGGATACAGGTGTTGTTTCCTGTTTATATAAGCGTAATTTCACATATGATGTGAATGCTGATTATTTGTATTTCCATTTTTATCAAGAAGGTGGTACTTTTTATGCATATTTTACAGACACTGGTGTTGTTACTAAGTTTCTGTTTAATGTTTATTTAGGCACGGTGCTCTCACATTATTATGTCATGCCTTTGACTTGTAATAGTGCTCTGACTTTAGAATATTGGGTTACACCCCTCACTTCTAAACAATATCTACTAGCTTTCAATCAAGATGGTGTTATTTTTAATGCTGTTGATTGTAAGAGTGATTTTATGAGTGAGATTAAGTGTAAAACACTATCTATAGCACCATCTACTGGTGTTTATGAATTAAACGGTTACACTGTTCAGCCAATTGCAGATGTTTACCGACGTATACCTAATCTTCCCGATTGCAATATTGAGGCTTGGCTTAATGATAAGTCGGTGCCCTCTCCATTAAATTGGGAACGTAAGACTTTTTCAAATTGTAATTTTAATATGAGCAGCCTGATGTCTTTTATTCAGGCAGACTCATTTACTTGTAATAATATTGATGCTGCTAAGATATATGGTATGTGTTTTTCCAGCATAACTATAGATAAGTTTGCAATACCCAATGGTAGGAAGGTTGACCTACAATTGGGTAATTTGGGTTATTTGCAGTCTTTTAACTATAGAATTGATACTACTGCTACAAGTTGTCAGTTGTATTATAATTTACCTGCTGCTAATGTTTCTGTTAGCAGGTTTAATCCTTCTACTTGGAATAGGAGATTTGGTTTTACAGAACAATCTGTTTTTAAGCCTCAACCTGCAGGTGTTTTTACTGATCATGATGTTGTTTATGCACAACATTGTTTTAAAGCTCCCACAAATTTCTGTCCGTGTAAATTGGATGGGTCTTTGTGTGTAGGTAATGGTCCTGGTATAGATGCTGGTTATAAAACTAGTGGCATAGGCACTTGTCCTGCAGGTACTAATTATTTAACTTGCCATAATGCTGCCCAATGTGATTGTTTGTGCACTCCAGACCCCATTACATCTAAAGCTACAGGGCCTTACAAGTGCCCCCAAACTAAATACTTAGTTGGCATAGGTGAGCACTGTTCGGGTCTTGCTATTAAAAGTGATTATTGTGGAGGTAACCCTTGTAGTTGCCAACCACAAGCATTTTTGGGTTGGTCTGTTGACTCTTGTTTACAAGGGGATAGGTGTAATATTTTTGCTAATTTTATTTTGCATGATGTTAATAGTGGTACTACTTGTTCTACTGATTTACAAAAATCAAACACAGACATAATTCTTGGTGTTTGTGTTAATTATGATCTTTATGGTATTACTGGCCAAGGGATTTTTGTTGAGGTTAATGCGACTTATTATAATAGTTGGCAGAACCTTTTATATGATTCTAATGGTAATCTCTATGGTTTTAGAGACTACTTAACAAATAGAACTTTTATGATTCGTAGTTGCTATAGTGGTCGTGTTTCAGCGGCCTTTCATGCTAACTCTTCCGAACCAGCATTGCTATTTCGGAATATCAAATGCAATTACGTTTTTAATAACACTCTTTCACGACAGCTGCAACCTATTAACTATTTTGATAGCTATCTTGGTTGTGTTGTCAATGCTGATAATAGTACTTCTATTGTTGTTCAAACATGTGATCTCACAGTAGGTAATGGTTACTGTGTGGATTACTCTACAAAAAGACGAAGTCGTAGATCGATTACCACTGGTTATCGGTTTACTAATTTTGAGCCATTTACTGTTAATTCAGTAAATGATAGTTTAGAACCTGTAGGTGGTTTGTATGAAATTCAAATACCTTCAGAGTTTACTATAGGTAATATGGAGGAGTTTATTCAAACAAGCTCTCCTAAAGTTACTATTGATTGTTCTGCTTTTGTCTGTGGTGATTATGCAGCATGTAAATCACAGTTGGTTGAATATGGTAGCTTCTGTGACAATATTAATGCTATACTCACAGAAGTAAATGAATTACTTGACACTACACAGTTGCAAGTAGCTAATAGTTTAATGAATGGTGTCACTCTTAGCACTAAGCTTAAAGATGGCGTTAATTTCAATGTAGACGACATCAATTTTTCCCCTGTATTAGGTTGTTTAGGAAGCGATTGCAATAAAGTTTCCAGTAGATCTGCTATAGAGGACTTACTTTTTTCTAAAGTAAAGTTATCTGATGTCGGTTTCGTTGAGGCTTATAATAATTGTACTGGAGGTGCCGAAATTAGGGACCTCATTTGTGTGCAAAGTTATAATGGTATCAAGGTGTTGCCTCCACTGCTCTCAGAAAATCAGATCAGTGGATACACTTTGGCTGCCACCTCTGCTAGCCTGTTTCCTCCATGGTCAGCAGCAGCAGGTGTACCATTCTATTTAAATGTTCAGTATCGTATTAATGGTATTGGTGTTACCATGGATGTGCTAAGTCAAAATCAAAAGCTTATTGCTAATGCATTTAACAATGCTCTTGGTGCTATCCAGGAAGGGTTTGATGCTACCAATTCTGCTTTAGTTAAAATTCAAGCTGTTGTTAATGCAAATGCTGAAGCTCTTAATAACTTATTGCAACAACTCTCTAATAGATTTGGTGCTATAAGTTCTTCTTTACAAGAAATTCTATCTAGACTGGATGCTCTTGAAGCGCAAGCTCAGATAGACAGACTTATTAATGGGCGTCTTACCGCTCTTAATGCTTATGTTTCTCAACAGCTTAGTGACTCTACACTAGTAAAGTTTAGTGCAGCACAAGCTATGGAGAAGGTTAATGAATGTGTCAAAAGCCAATCATCTAGGATAAATTTTTGTGGTAATGGTAATCATATTATATCATTAGTGCAGAATGCTCCATATGGTTTGTATTTTATCCACTTTAGCTATGTCCCTACTAAGTATGTCACAGCGAAGGTTAGTCCCGGTCTGTGCATTGCTGGTGGTAGAGGTATAGCCCCTAAGAGTGGTTATTTTGTTAATGTAAATAACTCTTGGATGTTCACTGGTAGTGGTTATTACTACCCTGAACCTATAACTGGAAATAATGTTGTTGTTATGAGTACCTGTGCTGTTAATTATACTAAAGCGCCGGATGTAATGCTGAACATTTCAACACCCAACCTCCCTGATTTTAAGGAAGAGTTGGATCAATGGTTTAAAAACCAAACATCAGTGGCACCAGATTTGTCACTTGATTATATAAATGTTACATTCTTGGACCTACAAGATGAAATGAATAGGTTACAGGAGGCAATAAAAGTTTTAAATCAGAGCTACATCAATCTCAAGGACATTGGTACATATGAGTATTATGTAAAATGGCCTTGGTATGTATGGCTTTTAATTGGCTTTGCTGGTGTAGCTATGCTTGTTTTACTATTCTTCATATGCTGTTGTACAGGATGTGGGACTAGTTGTTTTAAGAAATGTGGTGGTTGTTGTGATGATTATACTGGACACCAGGAGTTAGTAATTAAAACATCACATGAAGACATGTTTTTGCTTCCTAGATTTGTTCTAGTTAGCTGCATAATTGGTAGCCTAGGTTTTGACAACCCTCCTACCAATGTTGTTTCGCATTTAAATGGAGATTGGTTTTTATTTGGTGACAGTCGTTCAGATTGTAATCATGTTGTTACTACCAACCCCCGTAATTATTCTTATATGGACCTTAATCCTGCCTTGTGTGGTTCTGGTAAAATATCAGCTAAAGCTGGCAACTCCATTTTTAGGAGTTTTCACTTTACTGATTTTTATAATTACACAGGCGAAGGTCAACAAATTATTTTCTATGAGGGTGTTAATTTTACGCCTTATCATGCCTTTAAATGCACCACTTCTGGTAGTAATGATATTTGGATGCAGAATAAAGGCTTGTTTTACACTCAGGTTTATAAGAATATGGCTGTGTATCGCAGCCTTACTTTTGTTAATGTACCATATGTTTATAATGGCTCTGCACAATCTACAGCCCTTTGTAAATCTGGTAGTTTAGTTCTTAATAACCCTGCATATATAGCTCGTGAAGCTAATTTTGGGGATTATTATTATAAGGTTGAAGCTGATTTTTATTTGTCAGGTTGTGACGAGTATATCGTACCACTTTGTATTTTCAACGGCAAGTTTTTGTCGAATACAAAGTATTATGATGATAGTCAATATTATTTTAATAAAGACACTGGTGTTATTTATGGTCTCAATTCCACTGAAACCATTACCACTGGTTTTGACTTTAATTGTCATTATTTAGTTCTACCCTCTGGTAATTATTTAGCCATTTCAAATGAGCTATTGTTAACTGTTCCTACTAAAGCAATCTGTCTTAATAAGCGTAAGGATTTTACGCCTGTACAGGTTGTTGATTCGCGGTGGAACAATGCCAGGCAGTCTGATAACATGACGGCAGTTGCTTGTCAACCCCCGTACTGTTATTTTCGTAATTCTACTACCAATTATGTTGGTGTTTATGATATCAATCATGGGGATGCTGGTTTTACTAGCATACTCAGTGGTTTGTTATATGACTCACCTTGTTTTTCGCAGCAAGGTGTTTTTAGGTATGATAATGTTAGCAGTGTCTGGCCTCTCTACTCTTATGGCAGATGCCCTACTGCTGCTGATATTAATACCCCTGATGTACCCATTTGTGTGTATGATCCGCTACCAATTATTTTGCTTGGCATTCTTTTGGGTGTTGCGGTCATAATTATTGTAGTTTTGTTGTTATATTTTATGGTGGATAATGGTACTAGGCTGCATGATGCTATGTTTATGGCTGATGCTTATTTTGCAGACACTGTGTGGTATGTGGGGCAAATAATTTTTATAGTTGCCATTTGTTTATTGGTTATAATAGTTGTAGTGGCATTTTTGGCAACTTTTAAATTGTGTATTCAACTTTGCGGTATGTGTAATACCTTAGTACTGTCCCCTTCTATTTATGTGTTTAATAGAGGTAGGCAGTTTTATGAGTTTTACAATGATGTAAAACCACCAGTTCTTGATGTGGATGACGTTATGAGTAGTGTAACTACACCAGCACCAGTTTACACCTGGACTGCTGATGAAGCTATTAAATTCCTAAAGGAATGGAACTTTTCTTTGGGTATTATACTACTTTTTATTACAGTCATATTGCAATTTGGATATACAAGTCGCAGTATGTTTGTTTATGTTATTAAGATGATCATTTTGTGGCTTATGTGGCCCCTTACTATCATCTTAACTATTTTCAATTGCGTGTATGCGTTGAATAATGTGTATCTTGGCTTCTCTATAGTTTTTACTATAGTGGCCATTATCATGTGGATTGTGTATTTTGTGAATAGTATCAGGTTGTTTATTAGAACTGGAAGTTGGTGGAGTTTCAACCCAGAAACAAACAACTTGATGTGTATAGATATGAAGGGAAGGATGTATGTTAGGCCGATAATTGAGGACTACCATACCCTTACGGTCACAATAATACGTGGTCATCTTTACATGCAAGGTATAAAACTAGGTACTGGCTATTCTTTGTCAGATTTGCCAGCTTATGTGACTGTTGCTAAGGTCTCGCACCTGCTCACGTATAAGCGTGGTTTTCTTGACAAGATAGGCGATACTAGTGGTTTTGCTGTTTATGTTAAGTCCAAAGTCGGTAATTACCGACTGCCATCAACCCAAAAGGGTTCTGGCTTGGACACCGCATTGTTGAGAAATAATATCATGTCTTTTACTCCTGGTAAGCAATCCAGTAGTAGAGCGTCCTCTGGAAATCGTTCTGGTAATGGCATCCTTAAGTGGGCCGATCAGTCCGACCAATCTAGAAATGTTCAAACCAGGGGTAGAAGAGCTCAACCCAAGCAAACTGTTACTTCTCAGCAACCATCAGGAGGGAATGTTGTACCCTACTATTCTTGGTTCTCTGGAATTACTCAGTTTCAAAAGGGAAAGGAGTTTGAATTTGCAGAGGGACAAGGTGTGCCTATTGCACCAGGAGTCCCAGCTACTGAAGCTAAGGGGTACTGGTACAGACACAACCGACGTTCCTTTAAAACAGCCGATGGCAACCAGCGTCAATTGCTGCCACGATGGTATTTTTACTATCTTGGAACAGGACCGCATGCCAAAGACCAGTATGGCACCGACATTGACGGAGTCTACTGGGTCGCTAGTAACCAGGCTGATGTCAATACCCCGGCTGACATTCTCGATCGGGACCCAAGTAGCGATGAGGCTATTCCGACTAGGTTTCCGCCTGGCACGGTACTCCCTCAGGGTTACTATATTGAAGGCTCAGGAAGGTCTGCTCCTAATTCCAGATCTACTTCACGCGCATCCAGTAGAGCCTCTAGTGCAGGATCGCGCAGTAGAGCCAATTCTGGCAATAGAACCCCTACCTCTGGTGTAACACCTGATATGGCTGATCAAATTGCTAGTCTTGTTCTGGCAAAACTTGGCAAGGATGCCACTAAGCCACAGCAAGTAACTAAGCAGACTGCCAAAGAAATCAGACAGAAAATTTTGAATAAGCCCCGCCAGAAGAGGAGCCCCAATAAACAATGCACTGTTCAGCAGTGTTTTGGGAAGAGAGGCCCCAATCAGAATTTTGGTGGTGGAGAAATGTTAAAACTTGGAACTAGTGATCCACAGTTCCCCATTCTTGCAGAACTCGCACCCACAGCTGGTGCGTTTTTCTTTGGATCAAGATTAGAGTTGGCCAAAGTGCAGAATTTGTCTGGGAATCTTGACGAGCCCCAGAAGGATGTTTATGAATTGCGCTATAATGGCGCAATTAGATTTGATAGTACACTTTCAGGTTTTGAGACCATAATGAAGGTGTTGAATGAGAATTTGAATGCATACCAACAACAGGATGGTACGATGAATATGAGTCCAAAACCACAGCGTCAGCGTGGTCAGAAGAACGGACAAGGAGAAAATGATAATATAAGTGTTGCAGCGCCCAAAAGCCGTGTGCAGCAAAATAAGATTAGAGAGTTGACTGCAGAGGACATCAGCCTTCTTAAGAAGATGGATGAGCCCTTTACTGAAGACACCTCAGAAATA
>gi|145208920|gb|EF424618.1|_Bovine_coronavirus_R-AH65-TC_complete_genome
ATGTCGAAGATCAACAAATACGGTCTCGAACTACACTGGGCTCCAGAATTTCCATGGATGTTTGAGGACGCAGAGGAGAAGTTGGACAACCCTAGTAGTTCAGAGGTGGATATAGTATGCTCCACCACTGCGCAAAAGCTGGAAACAGGCGGAATTTGTCCTGAAAATCATGTGATGGTGGATTGTCGCCGACTTCTTAAACAAGAATGTTGTGTGCAGTCTAGCCTAATACGTGAAATTGTTATGAATACACGTCCATATGATTTGGAGGTGCTACTTCAAGATGCTTTGCAGTCCCGCGAAGCAGTTTTGGTTACACCCCCTCTAGGTATGTCTCTGGAGGCATGCTATGTGAGAGGTTGTAATCCTAATGGATGGACCATGGGTTTGTTTCGGCGTAGAAGTGTGTGTAACACTGGTCGCTGCGCTGTTAACAAGCATGTGGCCTATCAGCTATATATGATTGATCCTGCGGGTGTCTGTTTTGGTGCAGGTCAATTTGTGGGTTGGGTTATACCCTTAGCCTTTATGCCTGTGCAATCCCGGAAATTTATTGTTCCTTGGGTTATGTACTTGCGTAAGTGTGGCGAAAAGGGTGCCTACAACAAAGATCATAAACGTGGCGGTTTTGAACACGTTTATAATTTTAAAGTTGAGGATGCTTACGACTTGGTTCATGATGAGCCTAAGGGTAAGTTTTCTAAGAAGGCTTATGCTTTAATTAGAGGATACCGTGGTGTTAAACCGCTTCTTTATGTAGACCAGTATGGTTGTGATTATACTGGTGGTCTTGCAGATGGCTTAGAGGCTTATGCTGATAAGACATTGCAAGAAATGAAGGCATTATTTCCTATTTGGAGCCAGGAACTCCCTTTTGATGTAACTGTGGCATGGCACGTTGTGCGTGATCCACGTTATGTTATGAGACTGCAAAGTGCTTCTACTATACGTAGTGTTGCATATGTTGCTAACCCTACTGAAGACTTGTGTGATGGTTCTGTTGTTATAAAGGAACCTGTGCATGTTTATGCGGATGACTCTATTATTTTACGTCAACATAATTTAGTTGACATTATGAGTTGTTTTTATATGGAGGCAGATGCAGTTGTAAATGCTTTTTATGGTGTTGGTTTGAAAGATTGTGGTTTTGTTATGCAGTTTGGTTATATTGACTGCGAACAAGACTTGTGTGATTTTAAAGGTTGGGTTCCTGGTAATATGATAGATGGTTTTGCTTGCACTACTTGTGGTCATGTCTATGAGACAGGTGATTTGCTAGCACAATCTTCAGGTGTTCTGCCTGTTAATCCTGTATTGCATACTAAGAGTGCAGCAGGTTATGGTGGTTTTGGTTGTAAGGATTCTTTTACCCTGTATGGCCAAACTGTAGTTTATTTTGGAGGTTGTGTGTATTGGAGTCCAGCACGTAATATATGGATTCCTATATTAAAATCTTCTGTTAAGTCTTATGACGGTTTGGTTTATACTGGAGTTGTAGGTTGCAAGGCTATTGTAAAGGAAACAAATCTCATTTGCAAAGCGTTGTACCTTGATTATGTTCAACACAAGTGTGGCAATTTACACCAGCGGGAGTTGCTAGGTGTGTCAGATGTGTGGCATAAACAATTGTTATTAAATAGAGGTGTGTACAAACCTCTTTTAGAGAATATTGATTATTTTAATATGCGGCGCGCTAAATTTAGTTTAGAAACTTTTACTGTTTGTGCAGATGGTTTTATGCCTTTTCTTTTAGATGATTTGGTTCCGCGCGCATATTATTTGGCAGTAAGTGGTCAAGCATTTTGTGACTACGCAGATAAAATCTGCCATGCTGTTGTGTCTAAGAGTAAAGAGTTACTTGATGTGTCTCTGGATTCTTTAAGTGCAGCTATACATTATTTGAATTCTAAAATTGTTGATTTGGCTCAACATTTTAGTGATTTTGGAACAAGTTTTGTTTCTAAAATTGTTCATTTCTTTAAGACTTTTACTACTAGCACTGCTCTTGCATTTGCATGGGTTTTATTTCATGTTTTGCATGGTGCTTATATAGTAGTAGAGAGTGATATATATTTTGTTAAAAACATTCCTCGTTATGCTAGTGCTGTTGCACAAGCATTTCGGAGTGTTGCTAAAGTTGTACTGGACTCTTTAAGAGTTACTTTTATTGATGGCCTTTCTTGTTTTAAGATTGGACGTAGAAGAATTTGTCTCTCAGGCAGTAAAATTTATGAAGTTGAGCGTGGCTTGTTACATTCATCTCAATTGCCATTAGATGTTTATGATTTAACCATGCCTAGTCAAGTTCAGAAAGCCAAGCAAAAACCTATTTATTTAAAAGGTTCTGGTTCTGATTTTTCATTAGCAGATAGTGTGGTTGAAGTTGTTACAACTTCACTTACACCATGTGGTTATTCTGAACCACCTAAAGTTGCAGATAAAATTTGCATTGTGGATAATGTTTATATGGCCAAGGCTGGTGACAAATATTACCCTGTTGTGGTTGATGGTCATGTAGGACTCTTGGATCAAGCATGGAGGGTTCCTTGTGCTGGAAGGCGTGTTACATTTAAGGAACAGCCTACAGTAAATGAGATTGCAAGCACACCTAAGACTATTAAAGTTTTTTATGAGCTTGACAAAGATTTTAATACTATTTTAAACACTGCATGTGGAGTGTTTGAAGTAGATGATACCGTGGATATGGAGGAATTTTATGCTGTGGTGGTTGATGCCATAGAAGAGAAACTTTCTCCATGTAAGGAGCTTGAAGGTGTAGGTGCTAAAGTTAGTGCCTTTTTACAGAAATTAGAGGATAATTCCCTATTTTTATTTGATGAGGCTGGCGAGGAAGTTCTTGCTTCTAAATTGTATTGTGCTTTTACAGCTCCTGAAGATGATGACTTTCTTGAAGAAAGTGGTGTTGAAGAAGATGATGTAGAAGGTGAGGAAACTGATTTAACTGTCACAAGTGCTGGAGAGCCTTGTGTTGCCAGTGAACAGGAGGAGTCTTCTGAAATCTTAGAGGACACTTTGGATGATGGTCCATGTGTGGAGACATCTGATTCACAAGTTGAAGAAGATGTAGAAATGTCGGATTTTGCTGATCTTGAATCTGTGATTCAGGATTATGAAAATGTTTGTTTTGAGTTTTATACTACAGAGCCAGAATTTGTTAAAGTTTTGGATCTGTATGTGCCTAAAGCAACTCGCAACAATTGCTGGTTGCGATCAGTTTTGGCAGTGATGCAGAAACTGCCCTGTCAATTTAAAGACAAAAATTTGCAGGATCTTTGGGTGTTATATAAGCAACAGTATAGTCAGTTGTTTGTTGACACCTTGGTTAATAAGATACCTGCTAATATTGTAGTTCCACAAGGTGGTTATGTTGCCGATTTTGCATATTGGTTCTTAACCTTATGTGATTGGCAGTGTGTTGCATACTGGAAATGCATTAAATGTGATTTAGCTCTTAAGCTTAAAGGCTTGGATGCTATGTTCTTTTATGGTGATGTTGTCTCACATGTGTGCAAGTGTGGTGAGTCTATGGTACTTATTGATGTTGATGTGCCATTTACAGCCCACTTTGCTCTTAAAGATAAGTTGTTTTGTGCATTTATTACTAAGCGTAGTGTGTATAAAGCAGCTTGTGTTGTGGATGTTAATGATAGTCATTCTATGGCTGTTGTTGATGGTAAACAAATTGATGATCATCGTGTCACTAGTATTACTAGTGATAAGTTTGATTTTATTATTGGGCATGGTATGTCATTTTCAATGACTACTTTTGAAATTGCCCAATTGTATGGTTCTTGTATAACACCTAATGTATGTTTTGTTAAAGGTGATATAATTAAAGTTTCTAAGCGTGTTAAAGCAGAAGTCGTTGTAAATCCTGCTAATGGCCATATGGCACATGGTGGTGGTGTTGCAAAGGCTATTGCAGTAGCAGCTGGACAGCAGTTTGTTAAAGAGACTACCGATATGGTTAAGTCTAAAGGAGTTTGTGCTACTGGAGACTGTTATGTCTCTACAGGGGGTAAATTATGTAAAACTGTGCTTAATGTTGTTGGACCTGATGCGAGAACACAGGGTAAACAAAGTTATGCATTGTTAGAGCGTGTTTATAAACATCTTAACAAATATGATTGTGTTGTTACAACTTTGATATCAGCTGGTATATTTAGTGTGCCTTCTGATGTGTCTTTAACATATCTACTTGGTACTGCCGAGAAACAAGTTGTTCTTGTTAGCAATAATCAAGAGGATTTTGATCTTATTTCTAAGTGTCAGATAACTGCTGTTGAGGGCACTAAGAAATTGGCAGAGCGTCTTTCTTTTAATGTAGGGCGTTCTATCGTTTACGAAACAGATGCTAATAAGTTGATTTTAAGCAATGACGTTGCATTTGTTTCGACATTTAATGTCTTACAGGATGTTTTATCCTTAAGACATGATATAGCACTTGATGATGATGCACGAACCTTTGTTCAGAGCAATGTTGATGTTGTACCTGAGGGTTGGCGTGTTGTCAATAAGTTTTATCAAATTAATGGTGTTAGAACCGTTAAATATTTTGAGTGTCCCGGTGGCATAGATATATGCAGCCAGGATAAAGTTTTTGGTTATGTACAGCAGGGTAGTTTTAATAAGGCTACTGTTGCTCAAATTAAAGCCTTGTTTTTGGATAAAGTGGACATCTTGCTAACTGTTGATGGTGTTAATTTCACTAACAGGTTTGTGCCTGTAGGTGAAAGTTTTGGTAAGAGTCTAGGAAATGTGTTCTGTGATGGAGTTAATGTCACGAAACATAAGTGTGATATAAATTATAAAGGTAAAGTCTTTTTCCAGTTTGATAATCTTTCTAGTGAAGATTTAAAGGCTGTAAGAAGCTCTTTTAATTTTGACCAGAAGGAATTGCTTGCCTACTACAACATGCTTGTTAATTGTTCTAAATGGCAGGTTGTTTTTAATGGTAAGTATTTCACTTTTAAGCAAGCTAATAACAATTGTTTTGTTAATGTTTCTTGCTTAATGCTCCAGAGTTTGAATCTGAAATTTAAAATTGTTCAATGGCAGGAGGCGTGGCTTGAATTTCGTTCTGGCCGCCCTGCTAGATTTGTATCTTTGGTTTTGGCCAAAGGTGGGTTTAAATTTGGTGATCCTGCTGATTCTAGAGATTTCTTGCGTGTTGTGTTTAGTCAAGTTGATTTGACAGGGGCAATATGTGATTTTGAAATTGCATGTAAATGTGGTGTAAAGCAGGAACAGCGTACTGGTGTGGACGCTGTTATGCATTTTGGTACATTGAGTCGTGAAGATCTTGAGATTGGTTATACCGTGGATTGTTCTTGCGGTAAAAAGCTAATCCATTGTGTACGATTTGATGTACCATTTTTAATTTGTAGTAATACACCTGTTAGTGTAAAATTACCTAAGGGTGTAGGAAGTGCAAATATTTTTAAAGGTGATAAGGTTGGTCATTATGTTCATGTTAAGTGTGAACAGTCTTATCAGCTTTATGATGCTTCTAATGTTAAGAAGGTTACAGACGTTACTGGCAATTTGTCAGATTGTTTGTATCTTAAAAATTTGAAACAAACTTTTAAATCGGTGTTAACCACCTATTATTTGGATGATGTTAAGAAAATTGAGTATAAACCTGACTTGTCACAATATTATTGTGACGGAGGTAAGTATTATACTCAGCGTATTATTAAAGCCCAATTTAAAACATTTGAGAAAGTAGATGGTGTGTATACTAATTTTAAATTGATAGGACACACCATCTGTGATATTCTTAATGCTAAGTTGGGTTTTGATAGCTCTAAAGAGTTTGTTGAATATAAAGTTACTGAGTGGCCAACAGCTACAGGTGATGTGGTGTTGGCTACTGATGATTTGTATGTTAAGAGATATGAAAGGGGTTGTATTACTTTTGGTAAACCTGTTATATGGTTAAGCCATGAGCAAGCTTCCCTCAATTCTTTAACATATTTTAATAGACCTTTATTGGTTGATGAGAATAAATTTGATGTTTTAAAAGTGGATGATGTTGACGATGGTGGTGATATCTCAGAGAGTGATGCCAAAGAATCTAAAGAAATCAACATTATTAAGTTAAGTGGTGTTAAAAAACCATTTAAGGTTGAAGATAGTGTCATTGTTAATGATGATACTAGCGAAATCAAATATGTTAAGAGTTTGTCTATAGTTGATGTGTATGATATGTGGCTTACAGGTTGTAGGTATGTTGTTAGAACTGCTAATGCTTTGAGCATGGCAGTTAACGTACCTACAATACGTAAGTTTATAAAATTTGGTATGACTCTTGTTAGTATACCAATTGATTTGTTAAATTTAAGAGAGATTAAGCCTGTTTTTAATGTGGTTAAAGCTGTGCGAAATAAAATTTCTGCATGCTTTAATTTTATTAAATGGCTTTTTGTCTTATTATTTGGCTGGATTAAAATATCCGCTGATAATAAAGTAATTTACACCACAGAAGTTGCATCAAAGCTTACATGTAAGCTTGTAGCTTTAGCTTTTAAAAATGCGTTTTTGACATTTAAGTGGAGTGTGGTTGCTAGAGGTGCTTGCATTATAGCGACTATATTTCTATTGTGGTTTAATTTTATATATGCCAATGTAATTTTTAGTGATTTTTATTTGCCTAAAATTGGTTTCTTGCCGACTTTTGTTGGTAAGATCGCACAGTGGATTAAGAGCACTTTTAGTCTTGTAACTATTTGTGATCTATATTCCATTCAGGATGTGGGTTTTAAGAATCAGTATTGTAATGGAAGTATCGCATGTCAGTTCTGCTTGGCAGGATTTGATATGTTAGATAATTATAAAGCCATTGATGTAGTACAGTATGAAGCTGATAGGAGAGCATTTGTTGATTATACAGGTGTGTTAAAGATTGTCATTGAATTGATAGTTAGTTACGCCCTGTATACGGCATGGTTCTATCCATTGTTTGCTCTTATTAGTATTCAGATCTTGACCACTTGGCTGCCAGAGCTTTTTATGCTTAGTACATTACATTGGAGTGTTAGGTTGCTGGTGTCTTTAGCTAATATGTTACCAGCACATGTGTTTATGAGGTTTTATATTATTATTGCCTCTTTTATTAAGCTGTTTAGCTTGTTTAGGCATGTTGCCTATGGTTGTAGTAAACCTGGTTGTTTGTTTTGTTACAAGAGGAATCGTAGTCTACGTGTTAAATGTAGTACTATTGTTGGTGGCATGATACGCTATTACGATGTTATGGCTAATGGTGGCACTGGCTTTTGTTCAAAACATCAATGGAATTGCATTGATTGTGATTCTTATAAACCAGGTAATACTTTTATTACTGTTGAGGCCGCTCTTGATTTATCTAAGGAATTGAAACGGCCTATTCAGCCTACAGATGTTGCTTATCATACTGTTACGGATGTTAAGCAAGTTGGTTGTTATATGCGCTTGTTCTATGAGCGTGATGGACAGCGCACATATGATGATGTTAATGCTAGTTTGTTTGTGGATTATAGTAATTTGCTACATTCTAAGGTTAARGGTGTGCCTAATATGCATGTTGTGGTAGTGGAAAATGATGCCGATAAAGCTAATTTTCTTAATGCTGCTGTATTTTATGCACAGTCTTTGTTTAGACCTATTTTAATGGTTGATAAAAATCTGATAACTACTGCTAATACTGGTACGTCTGTTACAGAAACTATGTTTGATGTTTATGTGGACACATTTTTGTCTATGTTTGACGTGGATAAAAAGAGTCTTAATGCTTTAATAGCAACTGCGCATTCTTCTATAAAACAGGGTACGCAGATTTGTAAAGTTTTGGATACCTTTTTAAGCTGTGCTCGTAAAAGTTGTTCTATTGATTCAGATGTTGATACTAAGTGTTTAGCTGATTCTGTCATGTCTGCTGTATCGGCAGGCCTTGAATTGACGGATGAAAGTTGTAATAACTTGGTGCCAACATATTTGAAGGGTGATAACATTGTGGCAGCTGATTTAGGTGTTCTGATTCAAAATTCTGCTAAGCATGTGCAGGGTAATGTTGCTAAAATAGCCGGTGTTTCCTGTATATGGTCTGTGGATGCTTTTAATCAGCTAAGTTCTGATTTCCAGCATAAATTGAAGAAAGCATGTTGTAAAACTGGTTTGAAATTGAAGCTTACTTATAATAAGCAGATGGCTAATGTCTCTGTTTTAACTACACCCTTTAGTCTTAAAGGGGGTGCAGTTTTTAGTTATTTTGTTTATGTATGTTTTCTGTTGAGTTTGGTTTGTTTTATTGGATTGTGGTGCTTAATGCCCACTTACACAGTACACAAATCAGATTTTCAGCTTCCCGTTTATGCCAGTTATAAAGTTTTAGATAATGGTGTTATTAGAGATGTTAGCGTTGAAGATGTTTGTTTCGCTAACAAATTTGAACAATTTGATCAATGGTATGAGTCTACATTTGGTCTAAGTTATTATAGTAACAGTATGGCTTGTCCCATTGTTGTTGCTGTAGTAGACCAGGATTTTGGCTCTACTGTGTTTAATGTCCCTACCAAAGTGTTACGATATGGTTACCATGTGTTGCACTTTATTACACATGCACTTTCTGCTGATGGAGTGCAGTGTTATACGCCACATAGTCAAATATCGTATTCTAATTTTTATGCTAGTGGCTGTGTGCTTTCCTCTGCTTGTACTATGTTTGCAATGGCCGATGGTAGTCCACAACCTTATTGTTATACAGAGGGGCTTATGCAGAACGCTTCTCTGTATAGTTCATTGGTACCTCACGTGCGGTATAATCTTGCTAATGCTAAAGGTTTTATCCGTTTTCCAGAAGTGTTGCGAGAAGGACTTGTGCGTATTGTGCGTACTCGTTCTATGTCGTATTGCAGAGTTGGATTATGTGAGGAAGCTGATGAGGGTATATGCTTTAACTTTAATGGTTCTTGGGTGCTTAATAATGATTATTATAGATCATTGCCTGGGACCTTTTGTGGTAGAGATGTTTTTGACTTAATTTATCAGCTTTTTAAAGGTTTAGCACAGCCTGTGGATTTCTTGGCATTGACTGCTAGTTCTATTGCTGGTGCTATACTTGCTGTAATTGTTGTTTTGGTGTTTTATTACTTAATAAAGCTTAAACGTGCTTTTGGTGATTACACCAGTATTGTTTTTGTCAATGTGATTGTGTGGTGTGTAAATTTTATGATGCTTTTTGTGTTTCAAGTTTACCCTACACTTTCTTGTGTATATGCTATTTGTTATTTTTATGCCACGCTTTATTTCCCTTCGGAGATAAGTGTGATAATGCATTTACAATGGCTAGTTATGTATGGCACTATTATGCCTTTATGGTTTTGTTTGCTATATATATCTGTTGTTGTTTCAAATCATGCTTTTTGGGTATTCGCTTACTGCAGACGGCTTGGTACTTCTGTTCGTAGTGATGGTACATTTGAAGAAATGGCTCTTACTACTTTTATGATTACAAAAGATTCTTATTGTAAGCTTAAGAATTCTTTGTCTGATGTTGCTTTTAATAGATATTTGAGTTTGTATAATAAATATAGGTATTACAGCGGTAAAATGGATACTGCTGCATATAGGGAGGCTGCTTGTTCTCAGTTGGCTAAAGCAATGGATACATTTACCAATAATAATGGTAGTGATGTGCTTTACCAACCACCTACTGCTTCCGTTTCAACTTCATTCTTGCAATCTGGTATTGTGAAAATGGTTAATCCTACTTCTAAGGTAGAACCATGTATTGTCAGTGTTACCTATGGTAATATGACATTGAATGGTTTATGGTTGGATGATAAGGTCTACTGTCCCAGACATGTGATATGTTCTGCTTCAGATATGACTAATCCAGATTATACAAATTTGTTGTGTAGAGTAACATCAAGTGATTTTACTGTATTGTTTGATCGTTTAAGCCTTACAGTGATGTCTTATCAAATGCAGGGTTGTATGCTTGTTCTTACAGTGACCCTGCAAAATTCTCGTACGCCAAAATATACATTTGGTGTGGTTAAACCTGGTGAGACTTTTACTGTTTTAGCTGCTTATAACGGCAAACCACAAGGAGCCTTTCATGTGACTATGCGTAGTAGTTATACCATTAAGGGTTCCTTTTTATGCGGATCTTGTGGATCTGTTGGTTATGTGCTAATGGGTGATTGTGTTAAATTTGTGTATATGCATCAATTGGAGCTTAGTACTGGTTGTCATACTGGTACTGATTTCAATGGGGATTTTTATGGTCCTTATAAGGATGCTCAGGTTGTCCAATTGCCCGTTCAGGATTATATACAATCTGTTAATTTTGTAGCATGGCTTTATGCTGCTATACTTAATAATTGTAATTGGTTTGTACAAAGTGATAAGTGTTCTGTTGAAGATTTTAATGTGTGGGCTTTGTCTAATGGGTTTAGCCAAGTTAAGTCTGATCTTGTTATAGATGCCTTAGCTTCTATGACTGGTGTGTCTTTGGAAACAYTATTGGCTGCTATTAAGCGTCTCAAGAATGGTTTTCAAGGACGTCAGATTATGGGTAGTTGCTCCTTTGAGGATGAATTGACACCTAGCGATGTTTATCAACAACTCGCTGGTATCAAGTTACAATCAAAGCGTACTAGATTGGTTAAAGGCATTGTTTGTTGGATTATGGCTTCTACATTTTTGTTTAGTTGTATAATTACAGCATTTGTGAAATGGACTATGTTTATGTATGTAACTACTAATATGCTTAGTATTACGTTTTGTGCACTTTGTGTTATAAGTTTGGCCATGTTGTTGGTTAAACATAAGCATCTTTATTTGACTATGTATATAATTCCTGTGCTTTTTACACTGCTGTATAACAACTATTTGGTTGTGTACAAGCAGACATTTAGAGGCTATGTTTATGCATGGCTATCATATTATRTTCCATCAGTTGAGTATACTTATACTGATGAAGTTATTTAYGGCATGTTATTGCTTATAGGAATGGTCTTTGTTACATTACGTAGCATTAACCATGATTTGTTYTCTTTTATAATGTTTGTTGGTCRTGTGATTTCTGTTGTCTCTTTGTGGTACATGGGTTCTAAYTTAGAGGAAGAAATTCTTCTTATGTTGGCTTCTCTTTTTGGTACTTACACATGGACAACAGCTTTATCTATGGCTGCAGCAAAGGTTATTGCTAAGTGGGTTGCTGTGAATGTTTTGTATTTCACAGATATACCTCAAATTAAGATAGTGCTTGTATGCTATTTGTTTATAGGTTATATTATTAGCTGTTATTGGGGTTTGTTTTCCTTGATGAACAGTTTGTTTAGAATGCCTTTGGGTGTTTATAATTATAAAATTTCAGTACAGGAATTAAGATATATGAATGCTAATGGATTGCGCCCTCCTAAGAATAGTTTTGAAGCCCTTATGCTTAATTTTAAGCTTTTGGGTATTGGAGGTGTGCCAATTATTGAAGTATCTCAATTTCAATCAAAATTGACTGATGTTAAATGTGCTAATGTTGTCTTGCTTAATTGCTTGCAACATTTGCATGTTGCTTCTAACTCTAAGTTGTGGCAGTATTGTAGCACTTTGCACAATGAAATACTTGCCACTTCTGATCTGGGTGTTGCTTTTGAAAAGCTTGCTCAGTTGTTAATTGTTTTGTTTGCTAATCCAGCTGCTGTGGATAGCAAGTGCCTGACTAGTATTGAAGAAGTTTGCGACGATTACGCAAAGGACAATACTGTTTTGCAGGCTTTACAGAGTGAATTTGTTAATATGGCTAGCTTCGTTGAATATGAAGTTGCTAAGAAAAATCTTGATGAGGCGCGTTCTAGTGGTTCTGCTAATCAACAGCAGTTAAAACAGCTAGAGAAAGCTTGTAATATTGCTAAATCTGCTTATGAACGCGATCGTGCTGTAGCAAGAAAGTTGGAGCGTATGGCAGATTTGGCTCTCACTAATATGTATAAAGAAGCTAGAATTAATGATAAGAAGAGTAAGGTTGTTTCTGCCTTGCAAACTATGCTTTTTAGTATGGTGCGTAAGTTAGATAATCAAGCTCTGAATTCAATATTAGATAATGCTGTGAAGGGTTGTGTACCATTGAATGCAATCCCTTCATTGGCTGCAAATACTCTGACTATAATTGTACCAGATAAAAGTGTTTACGATCAGGTAGTTGACAATGTCTATGTTACCTATGCGGGTAATGTATGGCAGATTCAAACTATCCAAGATTCAGATGGTACAAATAAGCAGTTGAATGAGATATCTGATGATTGTAACTGGCCACTAGTTATTATTGCAAATCGGCATAATGAGGTATCTGCTACCGTTTTGCAAAATAATGAATTAATGCCTGCTAAGTTGAAAACTCAGGTTGTTAATAGTGGTCCAGATCAGACTTGTAACACACCTACTCAATGTTACTATAATAATAGTAACAATGGGAAGATTGTTTATGCTATACTTAGTGATGTTGATGGTCTTAAGTATACAAAGATTCTTAAAGATGATGGCAATTTTGTTGTTTTGGAGTTAGATCCTCCTTGTAAATTTACTGTTCAAGATGTTAAAGGTCTTAAAATTAAGTACCTTTATTTTGTAAAAGGTTGTAACACACTAGCAAGAGGATGGGTTGTTGGTACAATTTCTTCTACAGTTAGATTGCAAGCTGGAACTGCTACTGAGTATGCTTCCAACTCATCTATATTATCTTTATGTGCGTTTTCTGTAGATCCTAAGAAAACGTATTTAGATTTTATACAGCAGGGAGGAACACCTATTGCCAATTGTGTTAAAATGTTGTGTGACCATGCTGGTACCGGTATGGCCATTACTGTTAAACCCGATGCTACCACTAATCAGGATTCATATGGTGGTGCGTCTGTTTGTATCTATTGCCGCGCACGAGTTGAACACCCAGATGTTGATGGGTTGTGCAAATTACGCGGCAAGTTTGTACAAGTGCCTGTAGGTATAAAAGATCCTGTGTCTTATGTTTTGACACATGATGTTTGTCAAGTTTGTGGATTTTGGCGGGATGGAAGTTGTTCATGTGTTAGCACTGACACTACTGTTCAGTCAAAAGATACTAATTTTTTAAACCGGGGTACGAGTGTAGATGCCCGTCTCGTACCCTGTGCCAGTGGTTTATCTACTGATGTACAATTAAGGGCATTTGATATTTGCAATGCTAGTGTTGCTGGCATTGGTTTACATTTAAAAGTTAATTGCTGCCGTTTTCAGCGTGTTGATGAGAACGGTGATAAATTAGATCAGTTCTTTGTTGTTAAGAGGACAGATCTGACTATATATAATAGAGAGATGGAATGCTATGAGCGTGTAAAAGATTGTAAGTTTGTGGCTGAACACGATTTCTTTACATTTGATGTAGAAGGTAGTCGTGTGCCACATATTGTACGCAAGGATTTAACAAAGTATACTATGTTGGATCTTTGCTATGCGTTGCGACATTTTGATCGCAATGATTGCATGCTGCTTTGTGACATTCTCTCTATATATGCTGGTTGTGAACAATCCTACTTTACTAAGAAGGATTGGTATGATTTTGTTGAAAATCCTGATATTATTAATGTTTATAAAAAGCTAGGACCTATTTTTAATAGAGCCCTAGTTAGCGCTACTGAGTTTGCAGACAAATTGGTGGAGGTAGGCTTAGTAGGCATTTTAACACTTGATAACCAAGATTTAAATGGTAAATGGTATGATTTTGGTGACTATGTTATTGCAGCCCCAGGTTGTGGTGTTGCTATAGCAGACTCTTATTATTCTTATATGATGCCTATGCTGACCATGTGTCATGCATTGGATTGTGAATTGTATGTGAATAATGCTTATAGACTATTTGATCTTGTACAGTATGATTTTACTGATTACAAGCTCGAATTGTTTAATAAGTATTTTAAGCACTGGAGTATGCCATACCATCCTAACACGGTTGATTGTCAGGATGATCGGTGTATCATACATTGTGCTAATTTTAACATACTTTTTAGTATGGTTTTACCTAATACATGTTTTGGGCCTCTTGTTAGGCAAATTTTTGTGGATGGTGTTCCTTTTGTTGTTTCAATTGGATACCATTATAAAGAACTTGGTATTGTGATGAATATGGATGTGGATACACATCGTTATCGCTTGTCTTTAAAAGACTTGCTTTTATATGCTGCTGATCCAGCTTTGCATGTAGCTTCTGCTAGTGCATTGTATGATTTACGCACTTGCTGTTTTAGTGTTGCGGCTATAACAAGCGGTGTAAAATTTCAAACAGTTAAACCTGGTAATTTTAATCAGGATTTTTATGATTTTATTTTAAGTAAGGGCCTGCTTAAAGAGGGTAGTTCAGTTGATCTGAAGCACTTTTTCTTTACGCAGGATGGTAATGCTGCTATTACTGATTATAATTATTATAAGTATAATTTGCCCACCATGGTGGACATTAAGCAGTTGTTGTTTGTTTTGGAAGTTGTTTATAAGTATTTTGAGATTTATGATGGTGGGTGTATACCGGCATCACAAGTCATTGTTAATAATTATGATAAGAGTGCTGGCTATCCATTTAATAAATTTGGAAAAGCCAGGCTCTATTATGAAGCATTATCATTTGAGGAGCAGGATGAAATTTACGCCTATACTAAGCGCAATGTCCTGCCAACACTTACTCAAATGAATTTGAAATATGCTATTAGTGCTAAGAATAGAGCCCGCACTGTTGCTGGTGTTTCCATACTTAGTACTATGACTGGCAGAATGTTTCATCAAAAGTGTTTGAAAAGTATAGCAGCTACACGTGGTGTTCCTGTTGTTATAGGCACCACTAAATTTTATGGCGGCTGGGATGATATGTTACGTCGCCTTATTAAAGATGTTGATAATCCTGTACTTATGGGTTGGGATTATCCTAAGTGTGATCGTGCTATGCCAAACATACTACGTATTGTTAGTAGTCTGGTTTTGGCTCGAAAACATGAGGCATGTTGTTCGCAAAGCGATAGGTTTTATCGACTTGCGAATGAATGCGCACAAGTTCTGAGTGAAATTGTTATGTGTGGTGGCTGTTATTATGTTAAGCCTGGTGGCACTAGTAGTGGTGATGCAACTACTGCTTTTGCTAATTCAGTTTTTAACATATGTCAAGCTGTTTCAGCCAATGTATGTGCTTTAATGTCATGCAATGGTAATAAGATTGAAGATTTGAGTATACGTGCTCTTCAGAAGCGCTTATACTCACATGTGTATAGAAGTGATATGGTTGATTCAACCTTTGTCACAGAATATTATGAATTTTTAAATAAGCATTTTAGTATGATGATTTTGAGTGATGATGGCGTTGTGTGTTATAATTCTGATTATGCGTCCAAAGGGTATATTGCTAATATAAGTGCCTTTCAACAGGTATTGTATTATCAAAATAACGTTTTTATGTCAGAATCCAAATGTTGGGTTGAAAATGACATAAACAATGGACCTCATGAATTCTGTTCACAACACACAATGCTTGTAAAGATGGATGGGGACGATGTCTATCTTCCATATCCTGATCCTAGTCGTATATTAGGAGCTGGATGTTTTGTAGATGATTTGTTAAAGACTGATAGTGTTCTTTTAATAGAACGATTTGTAAGTCTTGCAATAGATGCTTATCCACTTGTGTACCACGAAAATGAAGAATACCAAAAGGTTTTTCGTGTTTATTTGGAGTATATAAAGAAGTTGTACAATGACCTGGGTAATCAGATCTTGGATAGCTACAGTGTTATTTTAAGTACTTGTGATGGACAAAAGTTTACTGATGAGTCCTTTTACAAGAACATGTATTTAAGAAGTGCAGTTATGCAGAGTGTTGGAGCTTGCGTGGTCTGCTCTTCTCAAACATCATTACGTTGTGGCAGTTGCATCAGAAAGCCTCTTCTTTGCTGCAAGTGTTGTTACGATCACGTTAGGGCAACTGATCATAAATATGTTTTGAGTGTTTCACCATATGTGTGTAACGCACCAGGATGTGATGTAAATGATGTTACCAAATTGTATCTAGGTGGTATGTCATATTATTGTGAAGATCATAAGCCACAATATTCGTTTAAGTTGGTAATGAATGGTATGGTTTTTGGTCTATATAAACAATCTTGTACAGGATCTCCGTACATAGATGATTTTAATCGTATAGCTAGTTGTAAATGGACTGATGTTGATGATTACATACTGGCTAATGAATGTACAGAGCGCTTGAAATTGTTTGCTGCAGAAACGCAAAAGGCGACTGAGGAAGCCTTTAAGCAGAGTTATGCATCAGCAACAATACAAGAGATTGTTAGCGAGCGCGAATTGATCCTTTCTTGGGAGATTGGAAAAGTGAAGCCACCACTTAATAAAAATTATGTTTTTACTGGCTACCATTTTACTAAAAATGGCAAGACAGTTTTAGGTGAGTATGTTTTTGATAAGAGTGAGTTGACTAATGGTGTGTATTATCGCGCCACAACCACTTATAAGCTATCTGTAGGAGATGTTTTTGTTTTAACCTCTCATTCAGTAGCTAATTTAAGTGCTCCTACGCTTGTGCCGCAGGAGAATTATAGTAGTATTAGATTTGCTAGTGTTTATAGTGTGCTTGAGACGTTTCAGAACAATGTCGTTAATTATCAACACATTGGTATGAAACGTTATTGTACCGTGCAAGGACCTCCTGGTACAGGAAAGTCACATCTTGCTATTGGTCTTGCTGTTTATTATTGTACAGCACGTGTAGTATACACTGCGGCCAGCCATGCAGCTGTTGACGCATTGTGTGAAAAAGCATACAAATTTTTGAATATAAATGACTGCACTCGTATTGTTCCTGCCAAGGTCAGGGTGGAGTGCTATGATAAGTTTAAAATTAATGACACCACTCGTAAGTATGTGTTTACTACTATAAATGCATTACCTGAGATGGTGACTGATATTGTTGTTGTAGATGAAGTTAGTATGCTTACCAATTATGAGCTTTCTGTTATTAATGCTCGTATTCGTGCTAAGCATTATGTTTACATTGGTGATCCTGCTCAATTGCCAGCACCACGTGTGTTATTGAGCAAGGGTACACTTGAACCTAAATATTTTAACACTGTTACTAAGCTTATGTGTTGCTTAGGGCCAGACATTTTTCTTGGTACATGTTATAGATGTCCTAAGGAAATTGTTGATACAGTGTCTGCCTTGGTTTATGAAAATAAGCTTAAGGCTAAGAATGAAAGTAGTTCATTGTGTTTTAAGGTCTATTATAAAGGCGTTACAACACATGAAAGTTCTAGTGCTGTAAATATGCAGCAGATTTATTTGATTAATAAGTTTTTGAAGGCTAACCCTTTGTGGCATAAAGCCGTTTTTATTAGCCCATATAATAGCCAGAACTTTGCAGCTAAGCGTGTTTTGGGTTTGCAAACCCAGACCGTGGATTCTGCTCAAGGTTCTGAATATGATTATGTTATATATTCACAGACTGCAGAAACAGCGCATTCTGTAAATGTTAATCGCTTCAATGTTGCTATTACTCGAGCCAAGAAAGGTATTCTTTGTGTTATGAGTAATATGCAGTTGTTTGAAGCATTACAGTTTACTACATTGACCTTAGATAAAGTGCCACATGCCGTTGAAACGAGAGTTCAATGTAGTACTAATTTATTTAAAGATTGTAGCAAGAGTTATAGTGGTTACCACCCAGCTCACGCTCCTTCATTTTTGGCAGTAGATGACAAATATAAGGCAACTGGCGATTTAGCCGTGTGTCTTGGTATTGGAGATTCTGCTGTTACATATTCAAGATTAATATCACTCATGGGTTTTAAACTTGATGTCACCCTTGATGGGTATTGTAAGCTTTTTATAACTAAAGAAGAAGCTGTTAAACGCGTGCGTGCTTGGGTTGGCTTTGATGCTGAAGGCGCTCATGCCACGCGTGATAGCATTGGGACAAATTTCCCACTTCAATTAGGGTTTTCTACAGGAATTGATTTTGTTGTGGAAGCCACTGGTTTGTTTGCTGATAGAGATGGTTACAGCTTTAAAAAGGCTGTGGCTAAAGCTCCTCCTGGTGAACAATTTAAGCATCTCATCCCTTTGATGACGAGAGGTCAGCGTTGGGATGTTGTTAGACCTAGAATAGTACAAATGTTTGCAGATCATTTAATTGATCTGTCTGATTGTGTTGTGCTAGTTACATGGGCAGCCAACTTTGAGCTCACTTGTCTCCGATACTTTGCAAAAGTAGGTCGTGAGATCTCTTGTAATGTGTGCACTAAACGTGCCACAGCTTACAATTCTAGAACTGGTTACTATGGTTGTTGGCGCCATAGTGTTACATGTGATTACTTGTATAATCCACTTATTGTTGATATTCAACAGTGGGGATATATTGGATCTTTATCAAGTAATCATGATTTATATTGTAGTGTCCATAAAGGAGCACATGTTGCTTCATCTGATGCTATAATGACACGGTGTTTGGCCGTTTATGATTGTTTTTGCAATAATATTAATTGGAATGTGGAGTATCCCATTATTTCAAATGAGTTAAGTATTAATACCTCTTGTAGGGTCTTGCAGCGTGTTATGCTTAAAGCTGCAATGCTCTGCAACAGATATACTTTGTGTTATGATATTGGCAACCCAAAAGCGATTGCCTGTGTCAAAGATTTTGATTTTAAGTTCTATGATGCCCAACCAATTGTTAAGTCTGTCAAGACTCTTTTGTATTCTTTTGAGGCACATAAGGACTCTTTTAAAGATGGTTTGTGTATGTTTTGGAACTGTAATGTGGATAAGTATCCACCGAATGCAGTTGTATGTAGATTTGACACGAGAGTGTTGAATAATTTAAATCTTCCTGGCTGTAATGGAGGTAGTTTGTATGTTAATAAACATGCATTCCACACTAAACCCTTTTCTAGGGCAGCCTTTGAGCATTTGAAGCCTATGCCATTTTTCTATTATTCAGATACGCCTTGCGTGTATATGGATGGCATGGATGCTAAGCAGGTTGATTATGTACCTTTGAAATCCGCCACTTGCATCACAAGATGCAATTTAGGTGGTGCAGTTTGTTTAAAACATGCTGAAGAGTATCGTGAGTACCTAGAGTCTTACAATACAGCTACTACAGCAGGTTTTACTTTTTGGGTCTATAAGACATTTGATTTTTATAATTTGTGGAATACGTTCACCAAGCTACAAAGCTTGGAGAACGTTGTATATAATTTAGTCAAAACTGGTCATTATACAGGACAGGCTGGTGAAATGCCTTGTGCCATTATAAATGATAAAGTTGTGGCTAAGATCGATAAGGAGGATGTTGTCATTTTTATTAATAATACAACATACCCTACTAATGTGGCTGTTGAATTATTTGCCAAGCGCAGTATTCGACACCATCCAGAGCTTAAGCTCTTTAGAAATTTAAATATAGACGTGTGTTGGAAGCACGTCATTTGGGATTATGCTAGAGAAAGTATATTTTGCAGTAATACCTATGGTGTCTGCATGTATACAGATTTAAAGTTCATTGATAAATTGAATGTCCTTTTTGATGGTCGTGATAATGGTGCTCTTGAAGCTTTTAAACGCTCTAATAATGGCGTTTACATTTCCACGACAAAAGTTAAGAGTCTTTCGATGATAAAAGGTCCACCGCGTGCTGAATTAAATGGCGTAGTGGTGGACAAGGTTGGAGACACTGATTGTGTGTTTTATTTTGCTGTGCGTAAAGAGGGTCAGGATGTCATCTTCAGCCAATTCGACAGCCTGAGAGTCAGCTCTAACCAGAGCCCACAAGGTAATCTGGGGAGTAATGAACCCGGTAATGTCGGTGGTAATGATGCTCTGGCAACCTCCACTATCTTTACACAAAGCCGTGTTATTAGCTCTTTTACATGTCGTACTGATATGGAAAAAGATTTTATAGCTTTAGATCAAGACGTGTTTATTCAGAAGTATGGTTTGGAGGACTATGCCTTTGAACACATTGTTTATGGTAATTTCAACCAGAAGATTATTGGTGGTTTGCATTTGTTAATAGGCTTGTACCGAAGGCAGCAAACTTCCAATCTGGTTATTCAGGAGTTTGTTTCATACGACTCCAGCATACACTCTTATTTTATCACTGATGAGAAGAGTGGTGGTAGTAAGAGTGTTTGCACTGTTATAGATATTTTGTTGGATGATTTTGTGGCTCTTGTTAAGTCATTTAATCTCAACTGTGTGAGTAAGGTTGTTAACGTTAATGTTGATTTTAAAGATTTTCAGTTCATGCTTTGGTGTAACGATGAGAAAGTTATGACTTTCTATCCTCGTTTGCAAGCTGCATCTGACTGGAAGCCTGGTTATTCTATGCCTGTATTATACAAGTATTTGAATTCCCCAATGGAAAGAGTTAGTCTCTGGAATTATGGGAAGCCGGTTACTTTGCCTACAGGCTGTATGATGAATGTTGCTAAGTATACTCAGTTATGTCAATATCTGAATACTACAACATTAGCTGTACCTGTTAATATGCGAGTTTTGCATTTAGGTGCAGGTTCAGAAAAAGGAGTAGCACCGGGTTCTGCAGTTCTTAGGCAGTGGTTGCCTGCTGGTACTATTCTTGTAGATAATGATTTATACCCATTTGTGAGTGACAGTGTCGCTACATATTTTGGGGATTGTATAACCTTACCCTTTGATTGTCAATGGGATTTGATAATTTCTGATATGTATGACCCTATTACTAAGAACATAGGGGAGTACAATGTAAGTAAAGATGGTTTCTTTACATACATTTGTCATATGATTCGCGACAAGTTAGCTCTGGGTGGCAGTGTTGCTATAAAAATAACAGAGTTTTCTTGGAATGCAGAATTATATAAGTTAATGGGGTATTTTGCATTTTGGACGGTTTTCTGCACAAATGCAAACGCTTCTTCTAGTGAAGGGTTTTTAATTGGCATAAATTATTTGGGTAAGCCCAAGGTTGAGATAGATGGAAATGTTATGCATGCCAATTATTTGTTTTGGAGAAATTCCACAGTTTGGAACGGGGGTGCTTATAGCCTGTTTGACATGGCTAAATTCCCGCTTAAGTTGGCTGGTACTGCCGTAATAAATTTAAGAGCAGACCAGATTAATGATATGGTTTATTCCCTTCTTGAAAAGGGTAAACTACTTGTTAGAGATACAAATAAAGAAGTTTTTGTTGGTGACAGTTTGGTTAATGTAATCATGGCAGTCGCTTATGCAGACAAGCCTAATCACTTTATCAATTTTCCACTTACCCAGTTTCAGGGTTTTGTGTTAAATTATAAAGGTTTACAATTTCAACTTCTCGATGAAGGAGTGGATTGTAAAATACAAACAGCGCCTCACATTAGTCTTGCTATGCTGGATATTCAGCCTGAAGACTACAGAAGTGTTGATGTTGCTATTCAAGAAGTTATTGATGATATGCATTGGGGTGAGGGCTTTCAGATTAAATTTGAAAACCCCCATATCCTAGGAAGATGCATAGTTTTAGATGTTAAAGGTGTAGAAGAATTGCATGATGATTTAGTTAATTACATTCGTGATAAAGGTTGTGTTGCTGACCAATCCAGGAAGTGGATTGGACATTGCACCATAGCCCAACTCACTGATGCTGCACTTTCCATTAAGGAAAATGTTGATTTTATAAACAGCATGCAATTCAACTATAAAATCACTATCAATCCCTCATCACCGGCTAGACTTGAAATAGTTAAGCTTGGTGCTGAAAAGAAAGATGGTTTTTATGAAACCATAGCTAGCCACTGGATGGGAATTCGTTTTGAATATAATCCACCCACTGATAAGCTAGCTATGATTATGGGTTATTGTTGTTTAGAAGTGGTGCGTAAAGAGCTAGAAGAAGGTGACCTTCCCGAGAATGATGATGATGCTTGGTTTAAGCTATCGTACCATTATGAAAACAATTCTTGGTTCTTTCGACATGTCTACAGGAAAAGTTCTTATTTCCGTAAGTCTTGTCAAAATTTAGATTGTAATTGTTTGGGGTTTTATGAATCTTCAGTTGAAGAAGACATGTTTTTGATACTTTTAATTTCCTTACCCACGGCTTTTGCTGTTATAGGAGATTTAAAGTGTACTACAGTCTCCATTAATGATGTTGACACTGGTGTTCCTTCTATTAGCACTGATACTGTCGATGTTACTAATGGTTTAGGTACTTATTATGTTTTAGATCGTGTGTATTTAAATACTACGTTGTTGCTTAATGGTTACTACCCTACTTCAGGTTCTACATATCGTAATATGGCACTGAAGGGAACTTTACTATTGAGCACACTGTGGTTTAAACCACCTTTTCTTTCTGATTTTACTAATGGTATTTTTGCTAAGGTCAAAAATACCAAGGTTGTTAAAGATGGTGTAATGTATAGTGAGTTTCCTGCTATAACTATAGGTAGTACTTTTGTAAATACATCTTATAGTGTGGTAGTACAACCACATACTACCATTTTGGGTAATAAATTACAAGGTTTCTTAGAGATCTCTGTTTGCCAGTATACTATGTGCGAGTACCCAAATACGATTTGTAATCCTAATCTGGGCAATCAACGCGTAGAACTATGGCATTGGGATACAGGTGTTGTTTCCTGTTTATATAAGCGTAATTTCACATACGATGTGAATGCTGATTATTTGTATTTCCATTTTTATCAAGAAGGTGGTACTTTTTATGCATATTTTACAGACACTGGTGTTGTTACTAAGTTTCTGTTTAATGTTTATTTAGGCACGGTGCTCTCACATTATTATGTCATGCCTTTGACTTGTAATAGTGCTCTGACTTTAGAATATTGGGTTACACCCCTCACTTCTAAACAATATCTACTAGCTTTCAATCAAGATGGTGTTATTTTTAATGCTGTTGATTGTAAGAGTGATTTTATGAGTGAGATTAAGTGTAAAACACTATCTATAGCACCATCTACTGGTGTTTATGAATTAAACGGTTACACTGTTCAGCCAATTGCAGATGTTTACCGACGTATACCTAATCTTCCCGATTGCAATATTGAGGCTTGGCTTAATGATAAGTCGGTGCCCTCTCCATTAAATTGGGAACGTAAGACCTTTTCAAATTGTAATTTTAATATGAGCAGCCTGATGTCTTTTATTCAGGCAGACTCATTTACTTGTAATAATATTGATGCTGCTAAGATATATGGCATGTGTTTTTCCAGCATAACTATAGATAAGTTTGCAATACCCAATGGTAGGAAGGTTGACCTACAATTGGGTAATTTGGGTTATTTGCAGTCTTTTAACTATAGAATTGATACTACTGCTACAAGTTGTCAGTTGTATTATAATTTACCTGCTGCTAATGTTTCTGTTAGCAGGTTTAATCCTTCTACTTGGAATAGGAGATTTGGTTTTACAGAACAATCTGTTTTTAAGCCTCAACCTGCAGGTGTTTTTACTGATCATGATGTTGTTTATGCACAACATTGTTTTAAAGCTCCCACAAATTTCTGTCCGTGTAAATTGGATGGGTCTTTGTGTGTAGGTAGTGGTTCTGGTATAGATGCTGGTTATAAAAATACTGGTATAGGCACTTGTCCTGCAGGTACTAATTATTTAACTTGCCATAATGCTGCCCAATGTAATTGTTTGTGCACTCCAGACCCCATTACATCTAAAGCTACAGGGCCTTACAAGTGCCCCCAAACTAAATATTTAGTTGGTATAGGTGAGCACTGTTCGGGTCTTGCTATTAAAAGTGATCATTGTGGAGGTAATCCTTGTAGTTGCCAACCACAAGCATTTTTGGGTTGGTCTGTTGACTCTTGTTTACAAGGGGATAGGTGTAATATTTTTGCTAATTTTATTTTGCATGATGTTAATAGTGGTACTACTTGTTCTACTGATTTACAAAAATCAAACACAGACATAATTCTTGGTGTTTGTGTTAATTATGATCTTTATGGTATTACTGGCCAAGGGATTTTTGTTGAGGTCAATGCGACTTATTATAATAGTTGGCAGAACCTTTTATATGATTCTAATGGTAATCTCTATGGTTTTAGAGACTACTTAACAAATAGAACTTTTATGATTCGTAGTTGCTATAGTGGTCGTGTTTCAGCGGCCTTTCATGCTAACTCTTCCGAACCAGCATTGCTATTTCGGAATATCAAATGCAATTACGTTTTTAATAACACTCTTTCACGACAGCTGCAACCTATTAACTATTTTGATAGCTATCTTGGTTGTGTTGTCAATGCTGATAATAGTACTTCTAGTGTTGTTCAAACATGTGATCTCACAGTAGGTAGTGGTTACTGTGTGGATTACTCTACAAAAAGACGAAGTCGTAGATCGATTACCACTGGTTATCGGTTTACTAATTTTGAGCCATTTACTGTTAATTCAGTAAATGATAGTTTAGAACCTGTAGGTGGTTTGTATGAAATTCAAATACCTTCAGAGTTTACTATAGGTAATATGGAGGAGTTTATTCAAACAAGCTCTCCTAAAGTTACTATTGATTGTTCTGCTTTTGTTTGTGGTGATTATGCAGCATGTAAATCACAGTTGGTTGAATATGGTAGCTTCTGTGACAATATTAATGCTATACTCACAGAAGTAAATGAACTACTTGACACTACACAGTTGCAAGTAGCTAATAGTTTAATGAATGGTGTCACTCTTAGCACTAAGCTTAAAGATGGCGTTAATTTCAATGTAGACGACATCAATTTTTCCCCTGTATTAGGTTGTTTAGGAAGCGATTGCAATAAAGTTTCCAGTAGATCTGCTATAGAGGACTTACTTTTTTCTAAAGTAAAGTTATCTGATGTCGGTTTCGTTGAGGCTTATAATAATTGTACTGGAGGTGCCGAAATTAGGGACCTCATTTGTGTGCAAAGTTATAATGGTATCAAGGTGTTGCCTCCACTGCTCTCAGAAAATCAGATCAGTGGATACACTTTGGCTGCCACCTCTGCTAGCCTGTTTCCTCCATGGTCAGCAGCAGCAGGTGTACCATTCTATTTAAATGTTCAGTATCGTATTAATGGTATTGGTGTTACCATGGATGTGCTAAGTCAAAATCAAAAGCTTATTGCTAATGCATTTAACAATGCTCTTGGTGCTATTCAGGAAGGGTTTGATGCTACCAATTCTGCTTTAGTTAAAATTCAAGCTGTTGTTAATGCAAATGCTGAAGCTCTTAATAACTTATTGCAACAACTCTCTAATAGATTTGGTGCTATAAGTTCTTCTTTACAAGAAATTCTATCTAGACTGGATGCTCTTGAAGCGCAAGCTCAGATAGACAGACTTATTAATGGGCGTCTTACCGCTCTTAATGCTTATGTTTCTCAACAGCTTAGTGACTCTACACTAGTAAAGTTTAGTGCAGCACAAGCTATGGAGAAGGTTAATGAATGTGTCAAAAGCCAATCATCTAGGATAAATTTTTGTGGTAATGGTAATCATATTATATCATTAGTGCAGAATGCTCCATATGGTTTGTATTTTATCCACTTTAGCTATGTCCCTACTAAGTATGTCACAGCGAAGGTTAGTCCCGGTCTGTGCATTGCTGGTGGTAGAGGTATAGCCCCTAAGAGTGGTTATTTTGTTAATGTAAATAATACTTGGATGTTCACTGGTAGTGGTTATTACTACCCTGAACCTATAACTGGAAATAATGTTGTTGTTATGAGTACCTGTGCTGTTAATTATACTAAAGCGCCGGATGTAATGCTGAACATTTCAACACCCAACCTCCCTGATTTTAAGGAAGAGTTGGATCAATGGTTTAAAAACCAAACCTCAGTGGCACCAGATTTGTCACTTGATTATATAAATGTTACATTCTTGGACCTACAAGATGAAATGAATAGGTTACAGGAGGCAATAAAAGTTTTAAATCAGAGCTACATCAATCTCAAGGACATTGGTACTTATGAGTATTATGTAAAATGGCCTTGGTATGTATGGCTTTTAATTGGCTTTGCAGGTGTAGCTATGCTTGTTTTACTATTCTTCATATGCTGTTGTACAGGATGTGGGACTAGTTGTTTTAAGAAATGTGGTGGTTGTTGTGATGATTATACAGGACACCAGGAGTTAGTAATTAAAACATCACATGAAGACATGTTTTTGCTTCCTAGATTTGTTCTAGTTAGCTGCATAATTGGTAGCCTAGGTTTTGACAACCCTCCTACCAATGTTGTTTCGCATTTAAATGGAGATTGGTTTTTATTTGGTGACAGTCGTTCAGATTGTAATCATGTTGTTACTACCAACCCCCGTAATTATTCTTATATGGACCTTAATCCTGCCTTGTGTGGTTCTGGTAAAATATCATCTAAAGCTGGCAACTCCATTTTTAGGAGTTTTCACTTTACCGATTTTTATAATTACACAGGCGAAGGTCAACAAATTATTTTCTATGAGGGTGTTAGTTTTACGCCTTATCATGCCTTTAAATGCACCACTTCTGGTAGTAATGATATTTGGATGCAGAATAAAGGCTTGTTTTACACTCAGGTTTATAAGAATATGGCTGTGTATCGCAGCCTTACTTTTGTTAATGTACCATATGTTTATAATGGCTCTGCACAATCTACAGCCCTTTGTAAATCTGGTAGTTTAGTTCTTAATAACCCTGCATATATAGCTCGTGAAGCTAATTTTGGGGATTATTATTATAAGGTTGAAGCTGATTTTTATTTGTCAGGTTGTGACGAGTATATCGTACCACTTTGTATTTTCAACGGCAAGTTTTTGTCGAATACAAAGTATTATGATGATAGTCAATATTATTTTAATAAAGACACTGGTGTTATTTATGGTCTCAATTCTACTGAAACCATTACCACTGGTTTTGACTTTAATTGTCATTATTTAGTTCTACCCTCTGGTAATTATTTAGCCATTTCAAATGAGCTATTGTTAACTGTTCCTACTAAAGCAATCTGTCTTAATAAGCGTAAGGATTTTACGCCTGTACAGGTTGTTGATTCGCGGTGGAACAATGCCAGGCAGTCTGATAACATGACGGCAGTTGCTTGTCAACCCCCGTACTGTTATTTTCGTAATTCTACTACCAATTATGTTGGTGTTTATGATATCAATCATGGGGATGCTGGTTTTACTAGCATACTCAGTGGTTTGTTATATGACTCACCTTGTTTTTCGCAGCAAGGTGTTTTTAGGTATGATAATGTTAGCAGTGTCTGGCCTCTCTACCCCTATGGCAGATGCCCTACTGCTGCTGATATTAATACCCCTGATGTACCTATTTGTGTGTATGATCCGCTACCAATTATTTTGCTTGGCATTCTTTTGGGTGTTGCGGTCATAATTATTGTAGTTTTGTTGTTATATTTTATGGTGGATAATGGTACTAGGCTGCATGATGCTATGTTTATGGCTGATGCTTATTTTGCAGACACTGTGTGGTATGTGGGGCAAATAATTTTTATAGTTGCCATTTGTTTATTGGTTATAATAGTTGTAGTGGCATTTTTGGCAACTTTTAAATTGTGTATTCAACTTTGCGGTATGTGTAATACCTTAGTACTGTCCCCTTCTATTTATGTGTTTAATAGAGGTAGGCAGTTTTATGAGTTTTACAATGATGTAAAACCACCAGTTCTTGATGTGGATGACGTTATGAGTAGTGTAACTACACCAGCACCAGTTTACACCTGGACTGCTGATGAAGCTATTAAATTCCTAAAGGAATGGAACTTTTCTTTGGGTATTATACTACTTTTTATTACAGTCATATTGCAATTTGGATATACAAGTCGCAGTATGTTTGTTTATGTTATTAAGATGATCATTTTGTGGCTTATGTGGCCCCTTACTATCATCTTAACTATTTTCAATTGCGTGTATGCGTTGAATAATGTGTATCTTGGCTTCTCTATAGTTTTTACTATAGTGGCCATTATCATGTGGATTGTGTATTTTGTGAATAGTATCAGGTTGTTTATTAGAACTGGAAGTTGGTGGAGTTTCAACCCAGAAACAAACAACTTGATGTGTATAGATATGAAGGGAAGGATGTATGTTAGGCCGATAATTGAGGACTACCATACCCTTACGGTCACAATAATACGTGGTCATCTTTACATGCAAGGTATAAAACTAGGTACTGGCTATTCTTTGTCAGATTTGCCAGCTTATGTGACTGTTGCCAAGGTCTCGCACCTGCTCACGTATAAGCGTGGTTTTCTTGACAAGATAGGCGATACTAGTGGTTTTGCTGTTTATGTTAAGTCCAAAGTCGGTAATTACCGACTGCCATCAACCCAAAAGGGTTCTGGCTTGGACACCGCATTGTTGAGAAATAATATCATGTCTTTTACTCCTGGTAAGCAATCCAGTAGTAGAGCGTCCTCTGGAAATCGTTCTGGTAATGGCATCCTTAAGTGGGCCGATCAGTCCGACCAATCTAGAAATGTTCAAACCAGGGGTAGAAGAGCTCAACCCAAGCAAACTGCTACTTCTCAGCAACCATCAGGAGGGAATGTTGTACCCTACTATTCTTGGTTCTCTGGAATTACTCAGTTTCAAAAGGGAAAGGAGTTTGAATTTGCAGAGGGACAAGGTGTGCCTATTGCACCAGGAGTCCCAGCTACTGAAGCTAAGGGGTACTGGTACAGACACAACCGACGTTCCTTTAAAACAGCCGATGGCAACCAGCGTCAATTGCTGCCACGATGGTATTTTTACTATCTTGGAACAGGACCGCATGCCAAAGACCAGTATGGCACCGACATTGACGGAGTCTACTGGGTCGCTAGTAACCAGGCTGATGTCAATACCCCGGCTGACATTCTCGATCGGGACCCAAGTAGCGATGAGGCTATTCCGACTAGGTTTCCGCCTGGCACGGTACTCCCTCAGGGTTACTATATTGAAGGCTCAGGAAGGTCTGCTCCTAATTCCAGATCTACTTCACGCGCATCCAGTAGAGCCTCTAGTGCAGGATCGCGCAGTAGAGCCAATTCTGGCAATAGAACCCCTACCTCTGGTGTAACACCTGATATGGCTGATCAAATTGCTAGTCTTGTTCTGGCAAAACTCGGCAAGGATGCCACTAAGCCACAGCAAGTAACTAAGCAGACTGCCAAAGAAATCAGACAGAAAATTTTGAATAAGCCCCGCCAGAAGAGGAGCCCCAATAAACAATGCACTGTTCAGCAGTGTTTTGGGAAGAGAGGCCCCAATCAGAATTTTGGTGGTGGAGAAATGTTAAAACTTGGAACTAGTGATCCACAGTTCCCCATTCTTGCAGAACTCGCACCCACAGCTGGTGCGTTTTTCTTTGGATCAAGATTAGAGTTGGCCAAAGTGCAGAATTTGTCTGGGAATCTTGACGAGCCCCAGAAGGATGTTTATGAATTGCGCTATAATGGCGCAATTAGATTTGATAGTACACTTTCAGGTTTTGAGACCATAATGAAGGTGTTGAATGAGAATTTGAATGCATACCAACAACAAGATGGTATGATGAATATGAGTCCAAAACCACAGCGTCAGCGTGGTCAGAAGAACGGACAAGGAGAAAATGATAATATAAGTGTTGCAGCGCCCAAAAGCCGTGCGCAGCAAAATAAGATTAGAGAGTTGACTGCAGAGGACATCAGCCTTCTTAAGAAGATGGATGAGCCCTTTACTGAAGACACCTCAGAAATA
>gi|145208908|gb|EF424617.1|_Bovine_coronavirus_R-AH65_complete_genome
ATGTCGAAGATCAACAAATACGGTCTCGAACTACACTGGGCTCCAGAATTTCCATGGATGTTTGAGGACGCAGAGGAGAAGTTGGACAACCCTAGTAGTTCAGAGGTGGATATAGTATGCTCCACCACTGCGCAAAAGCTGGAAACAGGCGGAATTTGTCCTGAAAATCATGTGATGGTGGATTGTCGCCGACTTCTTAAACAAGAATGTTGTGTGCAGTCTAGCCTAATACGTGAAATTGTTATGAATACACGTCCATATGATTTGGAGGTGCTACTTCAAGATGCTTTGCAGTCCCGCGAAGCAGTTTTGGTTACACCCCCTCTAGGTATGTCTCTGGAGGCATGCTATGTGAGAGGTTGTAATCCTAATGGATGGACCATGGGTTTGTTTCGGCGTAGAAGTGTGTGTAACACTGGTCGCTGCGCTGTTAACAAGCATGTGGCCTATCAGCTATATATGATTGATCCTGCGGGTGTCTGTTTTGGTGCAGGTCAATTTGTGGGTTGGGTTATACCCTTAGCCTTTATGCCTGTGCAATCCCGGAAATTTATTGTTCCTTGGGTTATGTACTTGCGTAAGTGTGGCGAAAAGGGTGCCTACAACAAAGATCATAAACGTGGCGGTTTTGAACACGTTTATAATTTTAAAGTTGAGGATGCTTACGACTTGGTTCATGATGAGCCTAAGGGTAAGTTTTCTAAGAAGGCTTATGCTTTAATTAGAGGATACCGTGGTGTTAAACCGCTTCTTTATGTAGACCAGTATGGTTGTGATTATACTGGTGGTCTTGCAGATGGCTTAGAGGCTTATGCTGATAAGACATTGCAAGAAATGAAGGCATTATTTCCTATTTGGAGCCAGGAACTCCCTTTTGATGTAACTGTGGCATGGCACGTTGTGCGTGATCCACGTTATGTTATGAGACTGCAAAGTGCTTCTACTATACGTAGTGTTGCATATGTTGCTAACCCTACTGAAGACTTGTGTGATGGTTCTGTTGTTATAAAGGAACCTGTGCATGTTTATGCGGATGACTCTATTATTTTACGTCAACATAATTTAGTTGACATTATGAGTTGTTTTTATATGGAGGCAGATGCAGTTGTAAATGCTTTTTATGGTGTTGGTTTGAAAGATTGTGGTTTTGTTATGCAGTTTGGTTATATTGACTGCGAACAAGACTTGTGTGATTTTAAAGGTTGGGTTCCTGGTAATATGATAGATGGTTTTGCTTGCACTACTTGTGGTCATGTCTATGAGACAGGTGATTTGCTAGCACAATCTTCAGGTGTTCTGCCTGTTAATCCTGTATTGCATACTAAGAGTGCAGCAGGTTATGGTGGTTTTGGTTGTAAGGATTCTTTTACCCTGTATGGCCAAACTGTAGTTTATTTTGGAGGTTGTGTGTATTGGAGTCCAGCACGTAATATATGGATTCCTATATTAAAATCTTCTGTTAAGTCTTATGACGGTTTGGTTTATACTGGAGTTGTAGGTTGCAAGGCTATTGTAAAGGAAACAAATCTCATTTGCAAAGCGTTGTACCTTGATTATGTTCAACACAAGTGTGGCAATTTACACCAGCGGGAGTTGCTAGGTGTGTCAGATGTGTGGCATAAACAATTGTTATTAAATAGAGGTGTGTACAAACCTCTTTTAGAGAATATTGATTATTTTAATATGCGGCGCGCTAAATTTAGTTTAGAAACTTTTACTGTTTGTGCAGATGGTTTTATGCCTTTTCTTTTAGATGATTTGGTTCCGCGCGCATATTATTTGGCAGTAAGTGGTCAAGCATTTTGTGACTACGCAGATAAAATCTGCCATGCTGTTGTGTCTAAGAGTAAAGAGTTACTTGATGTGTCTCTGGATTCTTTAAGTGCAGCTATACATTATTTGAATTCTAAAATTGTTGATTTGGCTCAACATTTTAGTGATTTTGGAACAAGTTTTGTTTCTAAAATTGTTCATTTCTTTAAGACTTTTACTACTAGCACTGCTCTTGCATTTGCATGGGTTTTATTTCATGTTTTGCATGGTGCTTATATAGTAGTAGAGAGTGATATATATTTTGTTAAAAACATTCCTCGTTATGCTAGTGCTGTTGCACAAGCATTTCGGAGTGTTGCTAAAGTTGTACTGGACTCTTTAAGAGTTACTTTTATTGATGGCCTTTCTTGTTTTAAGATTGGACGTAGAAGAATTTGTCTCTCAGGCAGTAAAATTTATGAAGTTGAGCGTGGCTTGTTACATTCATCTCAATTGCCATTAGATGTTTATGATTTAACCATGCCTAGTCAAGTTCAGAAAGCCAAGCAAAAACCTATTTATTTAAAAGGTTCTGGTTCTGATTTTTCATTAGCAGATAGTGTGGTTGAAGTTGTTACAACTTCACTTACACCATGTGGTTATTCTGAACCACCTAAAGTTGCAGATAAAATTTGCATTGTGGATAATGTTTATATGGCCAAGGCTGGTGACAAATATTACCCTGTTGTGGTTGATGGTCATGTAGGACTCTTGGATCAAGCATGGAGGGTTCCTTGTGCTGGAAGGCGTGTTACATTTAAGGAACAGCCTACAGTAAATGAGATTGCAAGCACACCTAAGACTATTAAAGTTTTTTATGAGCTTGACAAAGATTTTAATACTATTTTAAACACTGCATGTGGAGTGTTTGAAGTAGATGATACCGTGGATATGGAGGAATTTTATGCTGTGGTGGTTGATGCCATAGAAGAGAAACTTTCTCCATGTAAGGAGCTTGAAGGTGTAGGTGCTAAAGTTAGTGCCTTTTTACAGAAATTAGAGGATAATTCCCTATTTTTATTTGATGAGGCTGGCGAGGAAGTTCTTGCTTCTAAATTGTATTGTGCTTTTACAGCTCCTGAAGATGATGACTTTCTTGAAGAAAGTGGTGTTGAAGAAGATGATGTAGAAGGTGAGGAAACTGATTTAACTGTCACAAGTGCTGGAGAGCCTTGTGTTGCCAGTGAACAGGAGGAGTCTTCTGAAATCTTAGAGGACACTTTGGATGATGGTCCATGTGTGGAGACATCTGATTCACAAGTTGAAGAAGATGTAGAAATGTCGGATTTTGCTGATCTTGAATCTGTGATTCAGGATTATGAAAATGTTTGTTTTGAGTTTTATACTACAGAGCCAGAATTTGTTAAAGTTTTGGATCTGTATGTGCCTAAAGCAACTCGCAACAATTGCTGGTTGCGATCAGTTTTGGCAGTGATGCAGAAACTGCCCTGTCAATTTAAAGACAAAAATTTGCAGGATCTTTGGGTGTTATATAAGCAACAGTATAGTCAGTTGTTTGTTGACACCTTGGTTAATAAGATACCTGCTAATATTGTAGTTCCACAAGGTGGTTATGTTGCCGATTTTGCATATTGGTTCTTAACCTTATGTGATTGGCAGTGTGTTGCATACTGGAAATGCATTAAATGTGATTTAGCTCTTAAGCTTAAAGGCTTGGATGCTATGTTCTTTTATGGTGATGTTGTCTCACATGTGTGCAAGTGTGGTGAGTCTATGGTACTTATTGATGTTGATGTGCCATTTACAGCCCACTTTGCTCTTAAAGATAAGTTGTTTTGTGCATTTATTACTAAGCGTAGTGTGTATAAAGCAGCTTGTGTTGTGGATGTTAATGATAGTCATTCTATGGCTGTTGTTGATGGTAAACAAATTGATGATCATCGTGTCACTAGTATTACTAGTGATAAGTTTGATTTTATTATTGGGCATGGTATGTCATTTTCAATGACTACTTTTGAAATTGCCCAATTGTATGGTTCTTGTATAACACCTAATGTATGTTTTGTTAAAGGTGATATAATTAAAGTTTCTAAGCGTGTTAAAGCAGAAGTCGTTGTAAATCCTGCTAATGGCCATATGGCACATGGTGGTGGTGTTGCAAAGGCTATTGCAGTAGCAGCTGGACAGCAGTTTGTTAAAGAGACTACCGATATGGTTAAGTCTAAAGGAGTTTGTGCTACTGGAGACTGTTATGTCTCTACAGGGGGTAAATTATGTAAAACTGTGCTTAATGTTGTTGGACCTGATGCGAGAACACAGGGTAAACAAAGTTATGCATTGTTAGAGCGTGTTTATAAACATCTTAACAAATATGATTGTGTTGTTACAACTTTGATATCAGCTGGTATATTTAGTGTGCCTTCTGATGTGTCTTTAACATATCTACTTGGTACTGCCGAGAAACAAGTTGTTCTTGTTAGCAATAATCAAGAGGATTTTGATCTTATTTCTAAGTGTCAGATAACTGCTGTTGAGGGCACTAAGAAATTGGCAGAGCGTCTTTCTTTTAATGTAGGGCGTTCTATCGTTTACGAAACAGATGCTAATAAGTTGATTTTAAGCAATGACGTTGCATTTGTTTCGACATTTAATGTCTTACAGGATGTTTTATCCTTAAGACATGATATAGCACTTGATGATGATGCACGAACCTTTGTTCAGAGCAATGTTGATGTTGTACCTGAGGGTTGGCGTGTTGTCAATAAGTTTTATCAAATTAATGGTGTTAGAACCGTTAARTATTTTGAGTGTCCCGGTGGCATAGATATATGCAGCCAGGATAAAGTTTTTGGTTATGTACAGCAGGGTAGTTTTAATAAGGCTACTGTTGCTCAAATTAAAGCCTTGTTTTTGGATAAAGTGGACATCTTGCTAACTGTTGATGGTGTTAATTTCACTAACAGGTTTGTGCCTGTAGGTGAAAGTTTTGGTAAGAGTCTAGGAAATGTGTTCTGTGATGGAGTTAATGTCACGAAACATAAGTGTGATATAAATTATAAAGGTAAAGTCTTTTTCCAGTTTGATAATCTTTCTAGTGAAGATTTAAAGGCTGTAAGAAGCTCTTTTAATTTTGACCAGAAGGAATTGCTTGCCTACTACAACATGCTTGTTAATTGTTCTAAATGGCAGGTTGTTTTTAATGGTAAGTATTTCACTTTTAAGCAAGCTAATAACAATTGTTTTGTTAATGTTTCTTGCTTAATGCTCCAGAGTTTGAATCTGAAATTTAAAATTGTTCAATGGCAGGAGGCGTGGCTTGAATTTCGTTCTGGCCGCCCTGCTAGATTTGTATCTTTGGTTTTGGCCAAAGGTGGGTTTAAATTTGGTGATCCTGCTGATTCTAGAGATTTCTTGCGTGTTGTGTTTAGTCAAGTTGATTTGACAGGGGCAATATGTGATTTTGAAATTGCATGTAAATGTGGTGTAAAGCAGGAACAGCGTACTGGTGTGGACGCTGTTATGCATTTTGGTACATTGAGTCGTGAAGATCTTGAGATTGGTTATACCGTGGATTGTTCTTGCGGTAAAAAGCTAATCCATTGTGTACGATTTGATGTACCATTTTTAATTTGTAGTAATACACCTGTTAGTGTAAAATTACCTAAGGGTGTAGGAAGTGCAAATATTTTTAAAGGTGATAAGGTTGGTCATTATGTTCATGTTAAGTGTGAACAGTCTTATCAGCTTTATGATGCTTCTAATGTTAAGAAGGTTACAGACGTTACTGGCAATTTGTCAGATTGTTTGTATCTTAAAAATTTGAAACAAACTTTTAAATCGGTGTTAACCACCTATTATTTGGATGATGTTAAGAAAATTGAGTATAAACCTGACTTGTCACAATATTATTGTGACGGAGGTAAGTATTATACTCAGCGTATTATTAAAGCCCAATTTAAAACATTTGAGAAAGTAGATGGTGTGTATACTAATTTTAAATTGATAGGACACACCATCTGTGATATTCTTAATGCTAAGTTGGGTTTTGATAGCTCTAAAGAGTTTGTTGAATATAAAGTTACTGAGTGGCCAACAGCTACAGGTGATGTGGTGTTGGCTACTGATGATTTGTATGTTAAGAGATATGAAAGGGGTTGTATTACTTTTGGTAAACCTGTTATATGGTTAAGCCATGAGCAAGCTTCCCTCAATTCTTTAACATATTTTAATAGACCTTTATTGGTTGATGAGAATAAATTTGATGTTTTAAAAGTGGATGATGTTGACGATGGTGGTGATATCTCAGAGAGTGATGCCAAAGAATCTAAAGAAATCAACATTATTAAGTTAAGTGGTGTTAAAAAACCATTTAAGGTTGAAGATAGTGTCATTGTTAATGATGATACTAGCGAAATCAAATATGTTAAGAGTTTGTCTATAGTTGATGTGTATGATATGTGGCTTACAGGTTGTAGGTATGTTGTTAGAACTGCTAATGCTTTGAGCATGGCAGTTAACGTACCTACAATACGTAAGTTTATAAAATTTGGTATGACTCTTGTTAGTATACCAATTGATTTGTTAAATTTAAGAGAGATTAAGCCTGTTTTTAATGTGGTTAAAGCTGTGCGAAATAAAATTTCTGCATGCTTTAATTTTATTAAATGGCTTTTTGTCTTATTATTTGGCTGGATTAAAATATCCGCTGATAATAAAGTAATTTACACCACAGAAGTTGCATCAAAGCTTACATGTAAGCTTGTAGCTTTAGCTTTTAAAAATGCGTTTTTGACATTTAAGTGGAGTGTGGTTGCTAGAGGTGCTTGCATTATAGCGACTATATTTCTATTGTGGTTTAATTTTATATATGCCAATGTAATTTTTAGTGATTTTTATTTGCCTAAAATTGGTTTCTTGCCGACTTTTGTTGGTAAGATCGCACAGTGGATTAAGAGCACTTTTAGTCTTGTAACTATTTGTGATCTATATTCCATTCAGGATGTGGGTTTTAAGAATCAGTATTGTAATGGAAGTATCGCATGTCAGTTCTGCTTGGCAGGATTTGATATGTTAGATAATTATAAAGCCATTGATGTAGTACAGTATGAAGCTGATAGGAGAGCATTTGTTGATTATACAGGTGTGTTAAAGATTGTCATTGAATTGATAGTTAGTTACGCCCTGTATACGGCATGGTTCTATCCATTGTTTGCTCTTATTAGTATTCAGATCTTGACCACTTGGCTGCCAGAGCTTTTTATGCTTAGTACATTACATTGGAGTGTTAGGTTGCTGGTGTCTTTAGCTAATATGTTACCAGCACATGTGTTTATGAGGTTTTATATTATTATTGCCTCTTTTATTAAGCTGTTTAGCTTGTTTAGGCATGTTGCCTATGGTTGTAGTAAACCTGGTTGTTTGTTTTGTTACAAGAGGAATCGTAGTCTACGTGTTAAATGTAGTACTATTGTTGGTGGCATGATACGCTATTACGATGTTATGGCTAATGGTGGCACTGGCTTTTGTTCAAAACATCAATGGAATTGCATTGATTGTGATTCTTATAAACCAGGTAATACTTTTATTACTGTTGAGGCCGCTCTTGATTTATCTAAGGAATTGAAACGGCCTATTCAGCCTACAGATGTTGCTTATCATACKGTTACGGATGTTAAGCAAGTTGGTTGTTATATGCGCTTGTTCTATGAGCGTGATGGACAGCGCACATATGATGATGTTAATGCTAGTTTGTTTGTGGATTATAGTAATTTGCTACATTCTAAGGTTAARGGTGTGCCTAATATGCATGTTGTGGTAGTGGAAAATGATGCCGATAAAGCTAATTTTCTTAATGCTGCTGTATTTTATGCACAGTCTTTGTTTAGACCTATTTTAATGGTTGATAAAAATCTGATAACTACTGCTAATACTGGTACGTCTGTTACAGAAACTATGTTTGATGTTTATGTGGACACATTTTTGTCTATGTTTGAYGTGGATAAAAAGAGTCTTAATGCTTTAATAGCAACTGCGCATTCTTCTATAAAACAGGGTACGCAGATTTGTAAAGTTTTGGATACCTTTTTAAGCTGTGCTCGTAAAAGTTGTTCTATTGATTCAGATGTTGATACTAAGTGTTTAGCTGATTCTGTCATGTCTGCTGTATCGGCAGGCCTTGAATTGACGGATGAAAGTTGTAATAACTTGGTGCCAACATATTTGAAGGGTGATAACATTGTGGCAGCTGATTTAGGTGTTCTGATTCAAAATTCTGCTAAGCATGTGCAGGGTAATGTTGCTAAAATAGCCGGTGTTTCCTGTATATGGTCTGTGGATGCTTTTAATCAGCTAAGTTCTGATTTCCAGCATAAATTGAAGAAAGCATGTTGTAAAACTGGTTTGAAATTGAAGCTTACTTATAATAAGCAGATGGCTAATGTCTCTGTTTTAACTACACCCTTTAGTCTTAAAGGGGGTGCAGTTTTTAGTTATTTTGTTTATGTATGTTTTCTGTTGAGTTTGGTTTGTTTTATTGGATTGTGGTGCTTAATGCCCACTTACACAGTACACAAATCAGATTTTCAGCTTCCCGTTTATGCCAGTTATAAAGTTTTAGATAATGGTGTTATTAGAGATGTTAGCGTTGAAGATGTTTGTTTCGCTAACAAATTTGAACAATTTGATCAATGGTATGAGTCTACATTTGGTCTAAGTTATTATAGTAACAGTATGGCTTGTCCCATTGTTGTTGCTGTAGTAGACCAGGATTTTGGCTCTACTGTGTTTAATGTCCCTACCAAAGTGTTACGATATGGTTACCATGTGTTGCACTTTATTACACATGCACTTTCTGCTGATGGAGTGCAGTGTTATACGCCACATAGTCAAATATCGTATTCTAATTTTTATGCTAGTGGCTGTGTGCTTTCCTCTGCTTGTACTATGTTTGCAATGGCCGATGGTAGTCCACAACCTTATTGTTATACAGAGGGGCTTATGCAGAACGCTTCTCTGTATAGTTCATTGGTACCTCACGTGCGGTATAATCTTGCTAATGCTAAAGGTTTTATCCGTTTTCCAGAAGTGTTGCGAGAAGGACTTGTGCGTATTGTGCGTACTCGTTCTATGTCGTATTGCAGAGTTGGATTATGTGAGGAAGCTGATGAGGGTATATGCTTTAACTTTAATGGTTCTTGGGTGCTTAATAATGATTATTATAGATCATTGCCTGGGACCTTTTGTGGTAGAGATGTTTTTGACTTAATTTATCAGCTTTTTAAAGGTTTAGCACAGCCTGTGGATTTCTTGGCATTGACTGCTAGTTCTATTGCTGGTGCTATACTTGCTGTAATTGTTGTTTTGGTGTTTTATTACTTAATAAAGCTTAAACGTGCTTTTGGTGATTACACCAGTATTGTTTTTGTCAATGTGATTGTGTGGTGTGTAAATTTTATGATGCTTTTTGTGTTTCAAGTTTACCCTACACTTTCTTGTGTATATGCTATTTGTTATTTTTATGCCACGCTTTATTTCCCTTCGGAGATAAGTGTGATAATGCATTTACAATGGCTAGTTATGTATGGCACTATTATGCCTTTATGGTTTTGTTTGCTATATATATCTGTTGTTGTTTCAAATCATGCTTTTTGGGTATTCGCTTACTGCAGACGGCTTGGTACTTCTGTTCGTAGTGATGGTACATTTGAAGAAATGGCTCTTACTACTTTTATGATTACAAAAGATTCTTATTGTAAGCTTAAGAATTCTTTGTCTGATGTTGCTTTTAATAGATATTTGAGTTTGTATAATAAATATAGGTATTACAGCGGTAAAATGGATACTGCTGCATATAGGGAGGCTGCTTGTTCTCAGTTGGCTAAAGCAATGGATACATTTACCAATAATAATGGTAGTGATGTGCTTTACCAACCACCTACTGCTTCCGTTTCAACTTCATTCTTGCAATCTGGTATTGTGAAAATGGTTAATCCTACTTCTAAGGTAGAACCATGTATTGTCAGTGTTACCTATGGTAATATGACATTGAATGGTTTATGGTTGGATGATAAGGTCTACTGTCCCAGACATGTGATATGTTCTGCTTCAGATATGACTAATCCAGATTATACAAATTTGTTGTGTAGAGTAACATCAAGTGATTTTACTGTATTGTTTGATCGTTTAAGCCTTACAGTGATGTCTTATCAAATGCAGGGTTGTATGCTTGTTCTTACAGTGACCCTGCAAAATTCTCGTACGCCAAAATATACATTTGGTGTGGTTAAACCTGGTGAGACTTTTACTGTTTTAGCTGCTTATAACGGCAAACCACAAGGAGCCTTTCATGTGACTATGCGTAGTAGTTATACCATTAAGGGTTCCTTTTTATGCGGATCTTGTGGATCTGTTGGTTATGTGCTAATGGGTGATTGTGTTAAATTTGTGTATATGCATCAATTGGAGCTTAGTACTGGTTGTCATACTGGTACTGATTTCAATGGGGATTTTTATGGTCCTTATAAGGATGCTCAGGTTGTCCAATTGCCCGTTCAGGATTATATACAATCTGTTAATTTTGTAGCATGGCTTTATGCTGCTATACTTAATAATTGTAATTGGTTTGTACAAAGTGATAAGTGTTCTGTTGAAGATTTTAATGTGTGGGCTTTGTCTAATGGGTTTAGCCAAGTTAAGTCTGATCTTGTTATAGATGCCTTAGCTTCTATGACTGGTGTGTCTTTGGAAACACTATTGGCTGCTATTAAGCGTCTCAAGAATGGTTTTCAAGGACGTCAGATTATGGGTAGTTGCTCCTTTGAGGATGAATTGACACCTAGCGATGTTTATCAACAACTCGCTGGTATCAAGTTACAATCAAAGCGTACTAGATTGGTTAAAGGCATTGTTTGTTGGATTATGGCTTCTACATTTTTGTTTAGTTGTATAATTACAGCATTTGTGAAATGGACTATGTTTATGTATGTAACTACTAATATGCTTAGTATTACGYTTTGTGCACTTTGTGTTATAAGTTTGGCCATGTTGTTGGTTAAACATAAGCATCTTTATTTGACTATGTATATAATTCCTGTGCTTTTTACACTGCTGTATAACAACTATTTGGTTGTGTACAAGCAGACATTTAGAGGCTATGTTTATGCATGGCTATCATATTATRTTCCATCAGTTGAGTATACTTATACTGATGAAGTTATTTAYGGCATGTTATTGCTTATAGGAATGGTCTTTGTTACATTACGTAGCATTAACCATGATTTGTTCTCTTTTATAATGTTTGTTGGTCGTGTGATTTCTGTTGTCTCTTTGTGGTACATGGGTTCTAACTTAGAGGAAGAAATTCTTCTTATGTTGGCTTCTCTTTTTGGTACTTACACATGGACAACAGCTTTATCTATGGCTGCAGCAAAGGTTATTGCTAAGTGGGTTGCTGTGAATGTTTTGTATTTCACAGATATACCTCAAATTAAGATAGTGCTTGTATGCTATTTGTTTATAGGTTATATTATTAGCTGTTATTGGGGTTTGTTTTCCTTGATGAACAGTTTGTTTAGAATGCCTTTGGGTGTTTATAATTATAAAATTTCAGTACAGGAATTAAGATATATGAATGCTAATGGATTGCGCCCTCCTAAGAATAGTTTTGAAGCCCTTATGCTTAATTTTAAGCTTTTGGGTATTGGAGGTGTGCCAATTATTGAAGTATCTCAATTTCAATCAAAATTGACTGATGTTAAATGTGCTAATGTTGTCTTGCTTAATTGCTTGCAACATTTGCATGTTGCTTCTAACTCTAAGTTGTGGCAGTATTGTAGCACTTTGCACAATGAAATACTTGCCACTTCTGATCTGGGTGTTGCTTTTGAAAAGCTTGCTCAGTTGTTAATTGTTTTGTTTGCTAATCCAGCTGCTGTGGATAGCAAGTGCCTGACTAGTATTGAAGAAGTTTGCGACGATTACGCAAAGGACAATACTGTTTTGCAGGCTTTACAGAGTGAATTTGTTAATATGGCTAGCTTCGTTGAATATGAAGTTGCTAAGAAAAATCTTGATGAGGCGCGTTCTAGTGGTTCTGCTAATCAACAGCAGTTAAAACAGCTAGAGAAAGCTTGTAATATTGCTAAATCTGCTTATGAACGCGATCGTGCTGTAGCAAGAAAGTTGGAGCGTATGGCAGATTTGGCTCTCACTAATATGTATAAAGAAGCTAGAATTAATGATAAGAAGAGTAAGGTTGTTTCTGCCTTGCAAACTATGCTTTTTAGTATGGTGCGTAAGTTAGATAATCAAGCTCTGAATTCAATATTAGATAATGCTGTGAAGGGTTGTGTACCATTGAATGCAATCCCTTCATTGGCTGCAAATACTCTGACTATAATTGTACCAGATAAAAGTGTTTACGATCAGGTAGTTGACAATGTCTATGTTACCTATGCGGGTAATGTATGGCAGATTCAAACTATCCAAGATTCAGATGGTACAAATAAGCAGTTGAATGAGATATCTGATGATTGTAACTGGCCACTAGTTATTATTGCAAATCGGCATAATGAGGTATCTGCTACCGTTTTGCAAAATAATGAATTAATGCCTGCTAAGTTGAAAACTCAGGTTGTTAATAGTGGTCCAGATCAGACTTGTAACACACCTACTCAATGTTACTATAATAATAGTAACAATGGGAAGATTGTTTATGCTATACTTAGTGATGTTGATGGTCTTAAGTATACAAAGATTCTTAAAGATGATGGCAATTTTGTTGTTTTGGAGTTAGATCCTCCTTGTAAATTTACTGTTCAAGATGTTAAAGGTCTTAAAATTAAGTACCTTTATTTTGTAAAAGGTTGTAACACACTAGCAAGAGGATGGGTTGTTGGTACAATTTCTTCTACAGTTAGATTGCAAGCTGGAACTGCTACTGAGTATGCTTCCAACTCATCTATATTATCTTTATGTGCGTTTTCTGTAGATCCTAAGAAAACGTATTTAGATTTTATACAGCAGGGAGGAACACCTATTGCCAATTGTGTTAAAATGTTGTGTGACCATGCTGGTACCGGTATGGCCATTACTGTTAAACCCGATGCTACCACTAATCAGGATTCATATGGTGGTGCGTCTGTTTGTATCTATTGCCGCGCACGAGTTGAACACCCAGATGTTGATGGGTTGTGCAAATTACGCGGCAAGTTTGTACAAGTGCCTGTAGGTATAAAAGATCCTGTGTCTTATGTTTTGACACATGATGTTTGTCAAGTTTGTGGATTTTGGCGGGATGGAAGTTGTTCATGTGTTAGCACTGACACTACTGTTCAGTCAAAAGATACTAATTTTTTAAACCGGGGTACGAGTGTAGATGCCCGTCTCGTACCCTGTGCCAGTGGTTTATCTACTGATGTACAATTAAGGGCATTTGATATTTGCAATGCTAGTGTTGCTGGCATTGGTTTACATTTAAAAGTTAATTGCTGCCGTTTTCAGCGTGTTGATGAGAACGGTGATAAATTAGATCAGTTCTTTGTTGTTAAGAGGACAGATCTGACTATATATAATAGAGAGATGGAATGCTATGAGCGTGTAAAAGATTGTAAGTTTGTGGCTGAACACGATTTCTTTACATTTGATGTAGAAGGTAGTCGTGTGCCACATATTGTACGCAAGGATTTAACAAAGTATACTATGTTGGATCTTTGCTATGCGTTGCGACATTTTGATCGCAATGATTGCATGCTGCTTTGTGACATTCTCTCTATATATGCTGGTTGTGAACAATCCTACTTTACTAAGAAGGATTGGTATGATTTTGTTGAAAATCCTGATATTATTAATGTTTATAAAAAGCTAGGACCTATTTTTAATAGAGCCCTAGTTAGCGCTACTGAGTTTGCAGACAAATTGGTGGAGGTAGGCTTAGTAGGCATTTTAACACTTGATAACCAAGATTTAAATGGTAAATGGTATGATTTTGGTGACTATGTTATTGCAGCCCCAGGTTGTGGTGTTGCTATAGCAGACTCTTATTATTCTTATATGATGCCTATGCTGACCATGTGTCATGCATTGGATTGTGAATTGTATGTGAATAATGCTTATAGACTATTTGATCTTGTACAGTATGATTTTACTGATTACAAGCTCGAATTGTTTAATAAGTATTTTAAGCACTGGAGTATGCCATACCATCCTAACACGGTTGATTGTCAGGATGATCGGTGTATCATACATTGTGCTAATTTTAACATACTTTTTAGTATGGTTTTACCTAATACATGTTTTGGGCCTCTTGTTAGGCAAATTTTTGTGGATGGTGTTCCTTTTGTTGTTTCAATTGGATACCATTATAAAGAACTTGGTATTGTGATGAATATGGATGTGGATACACATCGTTATCGCTTGTCTTTAAAAGACTTGCTTTTATATGCTGCTGATCCAGCTTTGCATGTAGCTTCTGCTAGTGCATTGTATGATTTACGCACTTGCTGTTTTAGTGTTGCGGCTATAACAAGCGGTGTAAAATTTCAAACAGTTAAACCTGGTAATTTTAATCAGGATTTTTATGATTTTATTTTAAGTAAGGGCCTGCTTAAAGAGGGTAGTTCAGTTGATCTGAAGCACTTTTTCTTTACGCAGGATGGTAATGCTGCTATTACTGATTATAATTATTATAAGTATAATTTGCCCACCATGGTGGACATTAAGCAGTTGTTGTTTGTTTTGGAAGTTGTTTATAAGTATTTTGAGATTTATGATGGTGGGTGTATACCGGCATCACAAGTCATTGTTAATAATTATGATAAGAGTGCTGGCTATCCATTTAATAAATTTGGAAAAGCCAGGCTCTATTATGAAGCATTATCATTTGAGGAGCAGGATGAAATTTACGCCTATACTAAGCGCAATGTCCTGCCAACACTTACTCAAATGAATTTGAAATATGCTATTAGTGCTAAGAATAGAGCCCGCACTGTTGCTGGTGTTTCCATACTTAGTACTATGACTGGCAGAATGTTTCATCAAAAGTGTTTGAAAAGTATAGCAGCTACACGTGGTGTTCCTGTTGTTATAGGCACCACTAAATTTTATGGCGGCTGGGATGATATGTTACGTCGCCTTATTAAAGATGTTGATAATCCTGTACTTATGGGTTGGGATTATCCTAAGTGTGATCGTGCTATGCCAAACATACTACGTATTGTTAGTAGTCTGGTTTTGGCTCGAAAACATGAGGCATGTTGTTCGCAAAGCGATAGGTTTTATCGACTTGCGAATGAATGCGCACAAGTTCTGAGTGAAATTGTTATGTGTGGTGGCTGTTATTATGTTAAGCCTGGTGGCACTAGTAGTGGTGATGCAACTACTGCTTTTGCTAATTCAGTTTTTAACATATGTCAAGCTGTTTCAGCCAATGTATGTGCTTTAATGTCATGCAATGGTAATAAGATTGAAGATTTGAGTATACGTGCTCTTCAGAAGCGCTTATACTCACATGTGTATAGAAGTGATATGGTTGATTCAACCTTTGTCACAGAATATTATGAATTTTTAAATAAGCATTTTAGTATGATGATTTTGAGTGATGATGGCGTTGTGTGTTATAATTCTGATTATGCGTCCAAAGGGTATATTGCTAATATAAGTGCCTTTCAACAGGTATTGTATTATCAAAATAACGTTTTTATGTCAGAATCCAAATGTTGGGTTGAAAATGACATAAACAATGGACCTCATGAATTCTGTTCACAACACACAATGCTTGTAAAGATGGATGGGGACGATGTCTATCTTCCATATCCTGATCCTAGTCGTATATTAGGAGCTGGATGTTTTGTAGATGATTTGTTAAAGACTGATAGTGTTCTTTTAATAGAACGATTTGTAAGTCTTGCAATAGATGCTTATCCACTTGTGTACCACGAAAATGAAGAATACCAAAAGGTTTTTCGTGTTTATTTGGAGTATATAAAGAAGTTGTACAATGACCTGGGTAATCAGATCTTGGATAGCTACAGTGTTATTTTAAGTACTTGTGATGGACAAAAGTTTACTGATGAGTCCTTTTACAAGAACATGTATTTAAGAAGTGCAGTTATGCAGAGTGTTGGAGCTTGCGTGGTCTGCTCTTCTCAAACATCATTACGTTGTGGCAGTTGCATCAGAAAGCCTCTTCTTTGCTGCAAGTGTTGTTACGATCACGTTAGGGCAACTGATCATAAATATGTTTTGAGTGTTTCACCATATGTGTGTAACGCACCAGGATGTGATGTAAATGATGTTACCAAATTGTATCTAGGTGGTATGTCATATTATTGTGAAGATCATAAGCCACAATATTCGTTTAAGTTGGTAATGAATGGTATGGTTTTTGGTCTATATAAACAATCTTGTACAGGATCTCCGTACATAGATGATTTTAATCGTATAGCTAGTTGTAAATGGACTGATGTTGATGATTACATACTGGCTAATGAATGTACAGAGCGCTTGAAATTGTTTGCTGCAGAAACGCAAAAGGCGACTGAGGAAGCCTTTAAGCAGAGTTATGCATCAGCAACAATACAAGAGATTGTTAGCGAGCGCGAATTGATCCTTTCTTGGGAGATTGGAAAAGTGAAGCCACCACTTAATAAAAATTATGTTTTTACTGGCTACCATTTTACTAAAAATGGCAAGACAGTTTTAGGTGAGTATGTTTTTGATAAGAGTGAGTTGACTAATGGTGTGTATTATCGCGCCACAACCACTTATAAGCTATCTGTAGGAGATGTTTTTGTTTTAACCTCTCATTCAGTAGCTAATTTAAGTGCTCCTACGCTTGTGCCGCAGGAGAATTATAGTAGTATTAGATTTGCTAGTGTTTATAGTGTGCTTGAGACGTTTCAGAACAATGTCGTTAATTATCAACACATTGGTATGAAACGTTATTGTACCGTGCAAGGACCTCCTGGTACAGGAAAGTCACATCTTGCTATTGGTCTTGCTGTTTATTATTGTACAGCACGTGTAGTATACACTGCGGCCAGCCATGCAGCTGTTGACGCATTGTGTGAAAAAGCATACAAATTTTTGAATATAAATGACTGCACTCGTATTGTTCCTGCCAAGGTCAGGGTGGAGTGCTATGATAAGTTTAAAATTAATGACACCACTCGTAAGTATGTGTTTACTACTATAAATGCATTACCTGAGATGGTGACTGATATTGTTGTTGTAGATGAAGTTAGTATGCTTACCAATTATGAGCTTTCTGTTATTAATGCTCGTATTCGTGCTAAGCATTATGTTTACATTGGTGATCCTGCTCAATTGCCAGCACCACGTGTGTTATTGAGCAAGGGTACACTTGAACCTAAATATTTTAACACTGTTACTAAGCTTATGTGTTGCTTAGGGCCAGACATTTTTCTTGGTACATGTTATAGATGTCCTAAGGAAATTGTTGATACAGTGTCTGCCTTGGTTTATGAAAATAAGCTTAAGGCTAAGAATGAAAGTAGTTCATTGTGTTTTAAGGTCTATTATAAAGGCGTTACAACACATGAAAGTTCTAGTGCTGTAAATATGCAGCAGATTTATTTGATTAATAAGTTTTTGAAGGCTAACCCTTTGTGGCATAAAGCCGTTTTTATTAGCCCATATAATAGCCAGAACTTTGCAGCTAAGCGTGTTTTGGGTTTGCAAACCCAGACCGTGGATTCTGCTCAAGGTTCTGAATATGATTATGTTATATATTCACAGACTGCAGAAACAGCGCATTCTGTAAATGTTAATCGCTTCAATGTTGCTATTACTCGAGCCAAGAAAGGTATTCTTTGTGTTATGAGTAATATGCAGTTGTTTGAAGCATTACAGTTTACTACATTGACCTTAGATAAAGTGCCACATGCCGTTGAAACGAGAGTTCAATGTAGTACTAATTTATTTAAAGATTGTAGCAAGAGTTATAGTGGTTACCACCCAGCTCACGCTCCTTCATTTTTGGCAGTAGATGACAAATATAAGGCAACTGGCGATTTAGCCGTGTGTCTTGGTATTGGAGATTCTGCTGTTACATATTCAAGATTAATATCACTCATGGGTTTTAAACTTGATGTCACCCTTGATGGGTATTGTAAGCTTTTTATAACTAAAGAAGAAGCTGTTAAACGCGTGCGTGCTTGGGTTGGCTTTGATGCTGAAGGCGCTCATGCCACGCGTGATAGCATTGGGACAAATTTCCCACTTCAATTAGGGTTTTCTACAGGAATTGATTTTGTTGTGGAAGCCACTGGTTTGTTTGCTGATAGAGATGGTTACAGCTTTAAAAAGGCTGTGGCTAAAGCTCCTCCTGGTGAACAATTTAAGCATCTCATCCCTTTGATGACGAGAGGTCAGCGTTGGGATGTTGTTAGACCTAGAATAGTACAAATGTTTGCAGATCATTTAATTGATCTGTCTGATTGTGTTGTGCTAGTTACATGGGCAGCCAACTTTGAGCTCACTTGTCTCCGATACTTTGCAAAAGTAGGTCGTGAGATCTCTTGTAATGTGTGCACTAAACGTGCCACAGCTTACAATTCTAGAACTGGTTACTATGGTTGTTGGCGCCATAGTGTTACATGTGATTACTTGTATAATCCACTTATTGTTGATATTCAACAGTGGGGATATATTGGATCTTTATCAAGTAATCATGATTTATATTGTAGTGTCCATAAAGGAGCACATGTTGCTTCATCTGATGCTATAATGACACGGTGTTTGGCCGTTTATGATTGTTTTTGCAATAATATTAATTGGAATGTGGAGTATCCCATTATTTCAAATGAGTTAAGTATTAATACCTCTTGTAGGGTCTTGCAGCGTGTTATGCTTAAAGCTGCAATGCTCTGCAACAGATATACTTTGTGTTATGATATTGGCAACCCAAAAGCGATTGCCTGTGTCAAAGATTTTGATTTTAAGTTCTATGATGCCCAACCAATTGTTAAGTCTGTCAAGACTCTTTTGTATTCTTTTGAGGCACATAAGGACTCTTTTAAAGATGGTTTGTGTATGTTTTGGAACTGTAATGTGGATAAGTATCCACCGAATGCAGTTGTATGTAGATTTGACACGAGAGTGTTGAATAATTTAAATCTTCCTGGCTGTAATGGAGGTAGTTTGTATGTTAATAAACATGCATTCCACACTAAACCCTTTTCTAGGGCAGCCTTTGAGCATTTGAAGCCTATGCCATTTTTCTATTATTCAGATACGCCTTGCGTGTATATGGATGGCATGGATGCTAAGCAGGTTGATTATGTACCTTTGAAATCCGCCACTTGCATCACAAGATGCAATTTAGGTGGTGCAGTTTGTTTAAAACATGCTGAAGAGTATCGTGAGTACCTAGAGTCTTACAATACAGCTACTACAGCAGGTTTTACTTTTTGGGTCTATAAGACATTTGATTTTTATAATTTGTGGAATACGTTCACCAAGCTACAAAGCTTGGAGAACGTTGTATATAATTTAGTCAAAACTGGTCATTATACAGGACAGGCTGGTGAAATGCCTTGTGCCATTATAAATGATAAAGTTGTGGCTAAGATCGATAAGGAGGATGTTGTCATTTTTATTAATAATACAACATACCCTACTAATGTGGCTGTTGAATTATTTGCCAAGCGCAGTATTCGACACCATCCAGAGCTTAAGCTCTTTAGAAATTTAAATATAGACGTGTGTTGGAAGCACGTCATTTGGGATTATGCTAGAGAAAGTATATTTTGCAGTAATACCTATGGTGTCTGCATGTATACAGATTTAAAGTTCATTGATAAATTGAATGTCCTTTTTGATGGTCGTGATAATGGTGCTCTTGAAGCTTTTAAACGCTCTAATAATGGCGTTTACATTTCCACGACAAAAGTTAAGAGTCTTTCGATGATAAAAGGTCCACCGCGTGCTGAATTAAATGGCGTAGTGGTGGACAAGGTTGGAGACACTGATTGTGTGTTTTATTTTGCTGTGCGTAAAGAGGGTCAGGATGTCATCTTCAGCCAATTCGACAGCCTGAGAGTCAGCTCTAACCAGAGCCCACAAGGTAATCTGGGGAGTAATGAACCCGGTAATGTCGGTGGTAATGATGCTCTGGCAACCTCCACTATCTTTACACAAAGCCGTGTTATTAGCTCTTTTACATGTCGTACTGATATGGAAAAAGATTTTATAGCTTTAGATCAAGACGTGTTTATTCAGAAGTATGGTTTGGAGGACTATGCCTTTGAACACATTGTTTATGGTAATTTCAACCAGAAGATTATTGGTGGTTTGCATTTGTTAATAGGCTTGTACCGAAGGCAGCAAACTTCCAATCTGGTTATTCAGGAGTTTGTTTCATACGACTCCAGCATACACTCTTATTTTATCACTGATGAGAAGAGTGGTGGTAGTAAGAGTGTTTGCACTGTTATAGATATTTTGTTGGATGATTTTGTGGCTCTTGTTAAGTCATTTAATCTCAACTGTGTGAGTAAGGTTGTTAACGTTAATGTTGATTTTAAAGATTTTCAGTTCATGCTTTGGTGTAACGATGAGAAAGTTATGACTTTCTATCCTCGTTTGCAAGCTGCATCTGACTGGAAGCCTGGTTATTCTATGCCTGTATTATACAAGTATTTGAATTCCCCAATGGAAAGAGTTAGTCTCTGGAATTATGGGAAGCCGGTTACTTTGCCTACAGGCTGTATGATGAATGTTGCTAAGTATACTCAGTTATGTCAATATCTGAATACTACAACATTAGCTGTACCTGTTAATATGCGAGTTTTGCATTTAGGTGCAGGTTCAGAAAAAGGAGTAGCACCGGGTTCTGCAGTTCTTAGGCAGTGGTTGCCTGCTGGTACTATTCTTGTAGATAATGATTTATACCCATTTGTGAGTGACAGTGTCGCTACATATTTTGGGGATTGTATAACCTTACCCTTTGATTGTCAATGGGATTTGATAATTTCTGATATGTATGACCCTATTACTAAGAACATAGGGGAGTACAATGTAAGTAAAGATGGTTTCTTTACATACATTTGTCATATGATTCGCGACAAGTTAGCTCTGGGTGGCAGTGTTGCTATAAAAATAACAGAGTTTTCTTGGAATGCAGAATTATATAAGTTAATGGGGTATTTTGCATTTTGGACGGTTTTCTGCACAAATGCAAACGCTTCTTCTAGTGAAGGGTTTTTAATTGGCATAAATTATTTGGGTAAGCCCAAGGTTGAGATAGATGGAAATGTTATGCATGCCAATTATTTGTTTTGGAGAAATTCCACAGTTTGGAACGGGGGTGCTTATAGCCTGTTTGACATGGCTAAATTCCCGCTTAAGTTGGCTGGTACTGCCGTAATAAATTTAAGAGCAGACCAGATTAATGATATGGTTTATTCCCTTCTTGAAAAGGGTAAACTACTTGTTAGAGATACAAATAAAGAAGTTTTTGTTGGTGACAGTTTGGTTAATGTAATCATGGCAGTCGCTTATGCAGACAAGCCTAATCACTTTATCAATTTTCCACTTACCCAGTTTCAGGGTTTTGTGTTAAATTATAAAGGTTTACAATTTCAACTTCTCGATGAAGGAGTGGATTGTAAAATACAAACAGCGCCTCACATTAGTCTTGCTATGCTGGATATTCAGCCTGAAGACTACAGAAGTGTTGATGTTGCTATTCAAGAAGTTATTGATGATATGCATTGGGGTGAGGGCTTTCAGATTAAATTTGAAAACCCCCATATCCTAGGAAGATGCATAGTTTTAGATGTTAAAGGTGTAGAAGAATTGCATGATGATTTAGTTAATTACATTCGTGATAAAGGTTGTGTTGCTGACCAATCCAGGAAGTGGATTGGACATTGCACCATAGCCCAACTCACTGATGCTGCACTTTCCATTAAGGAAAATGTTGATTTTATAAACAGCATGCAATTCAACTATAAAATCACTATCAATCCCTCATCACCGGCTAGACTTGAAATAGTTAAGCTTGGTGCTGAAAAGAAAGATGGTTTTTATGAAACCATAGCTAGCCACTGGATGGGAATTCGTTTTGAATATAATCCACCCACTGATAAGCTAGCTATGATTATGGGTTATTGTTGTTTAGAAGTGGTGCGTAAAGAGCTAGAAGAAGGTGACCTTCCCGAGAATGATGATGATGCTTGGTTTAAGCTATCGTACCATTATGAAAACAATTCTTGGTTCTTTCGACATGTCTACAGGAAAAGTTCTTATTTCCGTAAGTCTTGTCAAAATTTAGATTGTAATTGTTTGGGGTTTTATGAATCTTCAGTTGAAGAAGACATGTTTTTGATACTTTTAATTTCCTTACCCACGGCTTTTGCTGTTATAGGAGATTTAAAGTGTACTACAGTCTCCATTAATGATGTTGACACTGGTGTTCCTTCTATTAGCACTGATACTGTCGATGTTACTAATGGTTTAGGTACTTATTATGTTTTAGATCGTGTGTATTTAAATACTACGTTGTTGCTTAATGGTTACTACCCTACTTCAGGTTCTACATATCGTAATATGGCACTGAAGGGAACTTTACTATTGAGCACACTGTGGTTTAAACCACCTTTTCTTTCTGATTTTACTAATGGTATTTTTGCTAAGGTCAAAAATACCAAGGTTGTTAAAGATGGTGTAATGTATAGTGAGTTTCCTGCTATAACTATAGGTAGTACTTTTGTAAATACATCTTATAGTGTGGTAGTACAACCACATACTACCATTTTGGGTAATAAATTACAAGGTTTCTTAGAGATCTCTGTTTGCCAGTATACTATGTGCGAGTACCCAAATACGATTTGTAATCCTAATCTGGGCAATCAACGCGTAGAACTATGGCATTGGGATACAGGTGTTGTTTCCTGTTTATATAAGCGTAATTTCACATACGATGTGAATGCTGATTATTTGTATTTCCATTTTTATCAAGAAGGTGGTACTTTTTATGCATATTTTACAGACACTGGTGTTGTTACTAAGTTTCTGTTTAATGTTTATTTAGGCACGGTGCTCTCACATTATTATGTCATGCCTTTGACTTGTAATAGTGCTCTGACTTTAGAATATTGGGTTACACCCCTCACTTCTAAACAATATCTACTAGCTTTCAATCAAGATGGTGTTATTTTTAATGCTGTTGATTGTAAGAGTGATTTTATGAGTGAGATTAAGTGTAAAACACTATCTATAGCACCATCTACTGGTGTTTATGAATTAAACGGTTACACTGTTCAGCCAATTGCAGATGTTTACCGACGTATACCTAATCTTCCCGATTGCAATATTGAGGCTTGGCTTAATGATAAGTCGGTGCCCTCTCCATTAAATTGGGAACGTAAGACCTTTTCAAATTGTAATTTTAATATGAGCAGCCTGATGTCTTTTATTCAGGCAGACTCATTTACTTGTAATAATATTGATGCTGCTAAGATATATGGCATGTGTTTTTCCAGCATAACTATAGATAAGTTTGCAATACCCAATGGTAGGAAGGTTGACCTACAATTGGGTAATTTGGGTTATTTGCAGTCTTTTAACTATAGAATTGATACTACTGCTACAAGTTGTCAGTTGTATTATAATTTACCTGCTGCTAATGTTTCTGTTAGCAGGTTTAATCCTTCTACTTGGAATAGGAGATTTGGTTTTACAGAACAATCTGTTTTTAAGCCTCAACCTGCAGGTGTTTTTACTGATCATGATGTTGTTTATGCACAACATTGTTTTAAAGCTCCCACAAATTTCTGTCCGTGTAAATTGGATGGGTCTTTGTGTGTAGGTAGTGGTTCTGGTATAGATGCTGGTTATAAAAATACTGGTATAGGCACTTGTCCTGCAGGTACTAATTATTTAACTTGCCATAATGCTGCCCAATGTAATTGTTTGTGCACTCCAGACCCCATTACATCTAAAGCTACAGGGCCTTACAAGTGCCCCCAAACTAAATATTTAGTTGGTATAGGTGAGCACTGTTCGGGTCTTGCTATTAAAAGTGATCATTGTGGAGGTAATCCTTGTAGTTGCCAACCACAAGCATTTTTGGGTTGGTCTGTTGACTCTTGTTTACAAGGGGATAGGTGTAATATTTTTGCTAATTTTATTTTGCATGATGTTAATAGTGGTACTACTTGTTCTACTGATTTACAAAAATCAAACACAGACATAATTCTTGGTGTTTGTGTTAATTATGATCTTTATGGTATTACTGGCCAAGGGATTTTTGTTGAGGTCAATGCGACTTATTATAATAGTTGGCAGAACCTTTTATATGATTCTAATGGTAATCTCTATGGTTTTAGAGACTACTTAACAAATAGAACTTTTATGATTCGTAGTTGCTATAGTGGTCGTGTTTCAGCGGCCTTTCATGCTAACTCTTCCGAACCAGCATTGCTATTTCGGAATATCAAATGCAATTACGTTTTTAATAACACTCTTTCACGACAGCTGCAACCTATTAACTATTTTGATAGCTATCTTGGTTGTGTTGTCAATGCTGATAATAGTACTTCTAGTGTTGTTCAAACATGTGATCTCACAGTAGGTAGTGGTTACTGTGTGGATTACTCTACAAAAAGACGAAGTCGTAGATCGATTACCACTGGTTATCGGTTTACTAATTTTGAGCCATTTACTGTTAATTCAGTAAATGATAGTTTAGAACCTGTAGGTGGTTTGTATGAAATTCAAATACCTTCAGAGTTTACTATAGGTAATATGGAGGAGTTTATTCAAACAAGCTCTCCTAAAGTTACTATTGATTGTTCTGCTTTTGTTTGTGGTGATTATGCAGCATGTAAATCACAGTTGGTTGAATATGGTAGCTTCTGTGACAATATTAATGCTATACTCACAGAAGTAAATGAACTACTTGACACTACACAGTTGCAAGTAGCTAATAGTTTAATGAATGGTGTCACTCTTAGCACTAAGCTTAAAGATGGCGTTAATTTCAATGTAGACGACATCAATTTTTCCCCTGTATTAGGTTGTTTAGGAAGCGATTGCAATAAAGTTTCCAGTAGATCTGCTATAGAGGACTTACTTTTTTCTAAAGTAAAGTTATCTGATGTCGGTTTCGTTGAGGCTTATAATAATTGTACTGGAGGTGCCGAAATTAGGGACCTCATTTGTGTGCAAAGTTATAATGGTATCAAGGTGTTGCCTCCACTGCTCTCAGAAAATCAGATCAGTGGATACACTTTGGCTGCCACCTCTGCTAGCCTGTTTCCTCCATGGTCAGCAGCAGCAGGTGTACCATTCTATTTAAATGTTCAGTATCGTATTAATGGTATTGGTGTTACCATGGATGTGCTAAGTCAAAATCAAAAGCTTATTGCTAATGCATTTAACAATGCTCTTGGTGCTATTCAGGAAGGGTTTGATGCTACCAATTCTGCTTTAGTTAAAATTCAAGCTGTTGTTAATGCAAATGCTGAAGCTCTTAATAACTTATTGCAACAACTCTCTAATAGATTTGGTGCTATAAGTTCTTCTTTACAAGAAATTCTATCTAGACTGGATGCTCTTGAAGCGCAAGCTCAGATAGACAGACTTATTAATGGGCGTCTTACCGCTCTTAATGCTTATGTTTCTCAACAGCTTAGTGACTCTACACTAGTAAAGTTTAGTGCAGCACAAGCTATGGAGAAGGTTAATGAATGTGTCAAAAGCCAATCATCTAGGATAAATTTTTGTGGTAATGGTAATCATATTATATCATTAGTGCAGAATGCTCCATATGGTTTGTATTTTATCCACTTTAGCTATGTCCCTACTAAGTATGTCACAGCGAAGGTTAGTCCCGGTCTGTGCATTGCTGGTGGTAGAGGTATAGCCCCTAAGAGTGGTTATTTTGTTAATGTAAATAATACTTGGATGTTCACTGGTAGTGGTTATTACTACCCTGAACCTATAACTGGAAATAATGTTGTTGTTATGAGTACCTGTGCTGTTAATTATACTAAAGCGCCGGATGTAATGCTGAACATTTCAACACCCAACCTCCCTGATTTTAAGGAAGAGTTGGATCAATGGTTTAAAAACCAAACCTCAGTGGCACCAGATTTGTCACTTGATTATATAAATGTTACATTCTTGGACCTACAAGATGAAATGAATAGGTTACAGGAGGCAATAAAAGTTTTAAATCAGAGCTACATCAATCTCAAGGACATTGGTACTTATGAGTATTATGTAAAATGGCCTTGGTATGTATGGCTTTTAATTGGCTTTGCAGGTGTAGCTATGCTTGTTTTACTATTCTTCATATGCTGTTGTACAGGATGTGGGACTAGTTGTTTTAAGAAATGTGGTGGTTGTTGTGATGATTATACAGGACACCAGGAGTTAGTAATTAAAACATCACATGAAGACATGTTTTTGCTTCCTAGATTTGTTCTAGTTAGCTGCATAATTGGTAGCCTAGGTTTTGACAACCCTCCTACCAATGTTGTTTCGCATTTAAATGGAGATTGGTTTTTATTTGGTGACAGTCGTTCAGATTGTAATCATGTTGTTACTACCAACCCCCGTAATTATTCTTATATGGACCTTAATCCTGCCTTGTGTGGTTCTGGTAAAATATCATCTAAAGCTGGCAACTCCATTTTTAGGAGTTTTCACTTTACCGATTTTTATAATTACACAGGCGAAGGTCAACAAATTATTTTCTATGAGGGTGTTAGTTTTACGCCTTATCATGCCTTTAAATGCACCACTTCTGGTAGTAATGATATTTGGATGCAGAATAAAGGCTTGTTTTACACTCAGGTTTATAAGAATATGGCTGTGTATCGCAGCCTTACTTTTGTTAATGTACCATATGTTTATAATGGCTCTGCACAATCTACAGCCCTTTGTAAATCTGGTAGTTTAGTTCTTAATAACCCTGCATATATAGCTCGTGAAGCTAATTTTGGGGATTATTATTATAAGGTTGAAGCTGATTTTTATTTGTCAGGTTGTGACGAGTATATCGTACCACTTTGTATTTTCAACGGCAAGTTTTTGTCGAATACAAAGTATTATGATGATAGTCAATATTATTTTAATAAAGACACTGGTGTTATTTATGGTCTCAATTCTACTGAAACCATTACCACTGGTTTTGACTTTAATTGTCATTATTTAGTTCTACCCTCTGGTAATTATTTAGCCATTTCAAATGAGCTATTGTTAACTGTTCCTACTAAAGCAATCTGTCTTAATAAGCGTAAGGATTTTACGCCTGTACAGGTTGTTGATTCGCGGTGGAACAATGCCAGGCAGTCTGATAACATGACGGCAGTTGCTTGTCAACCCCCGTACTGTTATTTTCGTAATTCTACTACCAATTATGTTGGTGTTTATGATATCAATCATGGGGATGCTGGTTTTACTAGCATACTCAGTGGTTTGTTATATGACTCACCTTGTTTTTCGCAGCAAGGTGTTTTTAGGTATGATAATGTTAGCAGTGTCTGGCCTCTCTACCCCTATGGCAGATGCCCTACTGCTGCTGATATTAATACCCCTGATGTACCTATTTGTGTGTATGATCCGCTACCAATTATTTTGCTTGGCATTCTTTTGGGTGTTGCGGTCATAATTATTGTAGTTTTGTTGTTATATTTTATGGTGGATAATGGTACTAGGCTGCATGATGCTATGTTTATGGCTGATGCTTATTTTGCAGACACTGTGTGGTATGTGGGGCAAATAATTTTTATAGTTGCCATTTGTTTATTGGTTATAATAGTTGTAGTGGCATTTTTGGCAACTTTTAAATTGTGTATTCAACTTTGCGGTATGTGTAATACCTTAGTACTGTCCCCTTCTATTTATGTGTTTAATAGAGGTAGGCAGTTTTATGAGTTTTACAATGATGTAAAACCACCAGTTCTTGATGTGGATGACGTTATGAGTAGTGTAACTACACCAGCACCAGTTTACACCTGGACTGCTGATGAAGCTATTAAATTCCTAAAGGAATGGAACTTTTCTTTGGGTATTATACTACTTTTTATTACAGTCATATTGCAATTTGGATATACAAGTCGCAGTATGTTTGTTTATGTTATTAAGATGATCATTTTGTGGCTTATGTGGCCCCTTACTATCATCTTAACTATTTTCAATTGCGTGTATGCGTTGAATAATGTGTATCTTGGCTTCTCTATAGTTTTTACTATAGTGGCCATTATCATGTGGATTGTGTATTTTGTGAATAGTATCAGGTTGTTTATTAGAACTGGAAGTTGGTGGAGTTTCAACCCAGAAACAAACAACTTGATGTGTATAGATATGAAGGGAAGGATGTATGTTAGGCCGATAATTGAGGACTACCATACCCTTACGGTCACAATAATACGTGGTCATCTTTACATGCAAGGTATAAAACTAGGTACTGGCTATTCTTTGTCAGATTTGCCAGCTTATGTGACTGTTGCCAAGGTCTCGCACCTGCTCACGTATAAGCGTGGTTTTCTTGACAAGATAGGCGATACTAGTGGTTTTGCTGTTTATGTTAAGTCCAAAGTCGGTAATTACCGACTGCCATCAACCCAAAAGGGTTCTGGCTTGGACACCGCATTGTTGAGAAATAATATCATGTCTTTTACTCCTGGTAAGCAATCCAGTAGTAGAGCGTCCTCTGGAAATCGTTCTGGTAATGGCATCCTTAAGTGGGCCGATCAGTCCGACCAATCTAGAAATGTTCAAACCAGGGGTAGAAGAGCTCAACCCAAGCAAACTGCTACTTCTCAGCAACCATCAGGAGGGAATGTTGTACCCTACTATTCTTGGTTCTCTGGAATTACTCAGTTTCAAAAGGGAAAGGAGTTTGAATTTGCAGAGGGACAAGGTGTGCCTATTGCACCAGGAGTCCCAGCTACTGAAGCTAAGGGGTACTGGTACAGACACAACCGACGTTCCTTTAAAACAGCCGATGGCAACCAGCGTCAATTGCTGCCACGATGGTATTTTTACTATCTTGGAACAGGACCGCATGCCAAAGACCAGTATGGCACCGACATTGACGGAGTCTACTGGGTCGCTAGTAACCAGGCTGATGTCAATACCCCGGCTGACATTCTCGATCGGGACCCAAGTAGCGATGAGGCTATTCCGACTAGGTTTCCGCCTGGCACGGTACTCCCTCAGGGTTACTATATTGAAGGCTCAGGAAGGTCTGCTCCTAATTCCAGATCTACTTCACGCGCATCCAGTAGAGCCTCTAGTGCAGGATCGCGCAGTAGAGCCAATTCTGGCAATAGAACCCCTACCTCTGGTGTAACACCTGATATGGCTGATCAAATTGCTAGTCTTGTTCTGGCAAAACTCGGCAAGGATGCCACTAAGCCACAGCAAGTAACTAAGCAGACTGCCAAAGAAATCAGACAGAAAATTTTGAATAAGCCCCGCCAGAAGAGGAGCCCCAATAAACAATGCACTGTTCAGCAGTGTTTTGGGAAGAGAGGCCCCAATCAGAATTTTGGTGGTGGAGAAATGTTAAAACTTGGAACTAGTGATCCACAGTTCCCCATTCTTGCAGAACTCGCACCCACAGCTGGTGCGTTTTTCTTTGGATCAAGATTAGAGTTGGCCAAAGTGCAGAATTTGTCTGGGAATCTTGACGAGCCCCAGAAGGATGTTTATGAATTGCGCTATAATGGCGCAATTAGATTTGATAGTACACTTTCAGGTTTTGAGACCATAATGAAGGTGTTGAATGAGAATTTGAATGCATACCAACAACAAGATGGTATGATGAATATGAGTCCAAAACCACAGCGTCAGCGTGGTCAGAAGAACGGACAAGGAGAAAATGATAATATAAGTGTTGCAGCGCCCAAAAGCCGTGCGCAGCAAAATAAGATTAGAGAGTTGACTGCAGAGGACATCAGCCTTCTTAAGAAGATGGATGAGCCCTTTACTGAAGACACCTCAGAAATA
>gi|145208896|gb|EF424616.1|_Bovine_coronavirus_E-AH65-TC_complete_genome
ATGTCGAAGATCAACAAATACGGTCTCGAACTACACTGGGCTCCAGAATTTCCATGGATGTTTGAGGACGCAGAGGAGAAGTTGGACAACCCTAGTAGTTCAGAGGTGGATATAGTATGCTCCACCACTGCGCAAAAGCTGGAAACAGGCGGAATTTGTCCTGAAAATCATGTGATGGTGGATTGTCGCCGACTTCTTAAACAAGAATGTTGTGTGCAGTCTAGCCTAATACGTGAAATTGTTATGAATACACGTCCATATGATTTGGAGGTGCTACTTCAAGATGCTTTGCAGTCCCGCGAAGCAGTTTTGGTTACACCCCCTCTAGGTATGTCTCTGGAGGCATGCTATGTGAGAGGTTGTAATCCTAATGGATGGACCATGGGTTTGTTTCGGCGTAGAAGTGTGTGTAACACTGGTCGCTGCGCTGTTAACAAGCATGTGGCCTATCAGCTATATATGATTGATCCTGCGGGTGTCTGTTTTGGTGCAGGTCAATTTGTGGGTTGGGTTATACCCTTAGCCTTTATGCCTGTGCAATCCCGGAAATTTATTGTTCCTTGGGTTATGTACTTGCGTAAGTGTGGCGAAAAGGGTGCCTACAACAAAGATCATAAACGTGGCGGTTTTGAACACGTTTATAATTTTAAAGTTGAGGATGCTTACGACTTGGTTCATGATGAGCCTAAGGGTAAGTTTTCTAAGAAGGCTTATGCTTTAATTAGAGGATACCGTGGTGTTAAACCGCTTCTTTATGTAGACCAGTATGGTTGTGATTATACTGGTGGTCTTGCAGATGGCTTAGAGGCTTATGCTGATAAGACATTGCAAGAAATGAAGGCATTATTTCCTATTTGGAGCCAGGAACTCCCTTTTGATGTAACTGTGGCATGGCACGTTGTGCGTGATCCACGTTATGTTATGAGACTGCAAAGTGCTTCTACTATACGTAGTGTTGCATATGTTGCTAACCCTACTGAAGACTTGTGTGATGGTTCTGTTGTTATAAAGGAACCTGTGCATGTTTATGCGGATGACTCTATTATTTTACGTCAACATAATTTAGTTGACATTATGAGTTGTTTTTATATGGAGGCAGATGCAGTTGTAAATGCTTTTTATGGTGTTGATTTGAAAGATTGTGGTTTTGTTATGCAGTTTGGTTATATTGACTGCGAACAAGACTTGTGTGATTTTAAAGGTTGGGTTCCTGGTAATATGATAGATGGTTTTGCTTGCACTACTTGTGGTCATGTCTATGAGACAGGTGATTTGCTAGCACAATCTTCAGGTGTTCTGCCTGTTAATCCTGTATTGCATACTAAGAGTGCAGCAGGTTATGGTGGTTTTGGTTGTAAGGATTCTTTTACCCTGTATGGCCAAACTGTAGTTTATTTTGGAGGTTGTGTGTATTGGAGTCCAGCACGTAATATATGGATTCCTATATTAAAATCTTCTGTTAAGTCTTATGACGGTTTGGTTTATACTGGAGTTGTAGGTTGCAAGGCTATTGTAAAGGAAACAAATCTCATTTGCAAAGCGTTGTACCTTGATTATGTTCAACACAAGTGTGGCAATTTACACCAGCGGGAGTTGCTAGGTGTGTCAGATGTGTGGCATAAACAATTGTTATTAAATAGAGGTGTGTACAAACCTCTTTTAGAGAATATTGATTATTTTAATATGCGGCGCGCTAAATTTAGTTTAGAAACTTTTACTGTTTGTGCAGATGGTTTTATGCCTTTTCTTTTAGATGATTTGGTTCCGCGCGCATATTATTTGGCAGTAAGTGGTCAAGCATTTTGTGACTACGCAGATAAAATCTGCCATGCTGTTGTGTCTAAGAGTAAAGAGTTACTTGATGTGTCTCTGGATTCTTTAGGTGCAGCTATACATTATTTGAATTCTAAAATTGTTGATTTGGCTCAACATTTTAGTGATTTTGGAACAAGTTTTGTTTCTAAAATTGTTCATTTCTTTAAGACTTTTACTACTAGCACTGCTCTTGCATTTGCATGGGTTTTATTTCATGTTTTGCATGGTGCTTATATAGTAGTAGAGAGTGATATATATTTTGTTAAAAACATTCCTCGTTATGCTAGTGCTGTTGCACAAGCATTTCGGAGTGTTGCTAAAGTTGTACTGGACTCTTTAAGAGTTACTTTTATTGATGGCCTTTCTTGTTTTAAGATTGGACGTAGAAGAATTTGTCTCTCAGGCAGTAAAATTTATGAAGTTGAGCGTGGCTTGTTACATTCATCTCAATTGCCATTAGATGTTTATGATTTAACCATGCCTAGTCAAGTTCAGAAAGCCAAGCAAAAACCTATTTATTTAAAAGGTTCTGGTTCTGATTTTTCATTAGCAGATAGTGTGGTTGAAGTTGTTACAACTTCACTTACACCATGTGGTTATTCTGAACCACCTAAAGTTGCAGATAAAATTTGCATTGTGGATAATGTTTATATGGCCAAGGCTGGTGACAAATATTACCCTGTCGTGGTTGATGGTCATGTAGGACTCTTGGATCAAGCATGGAGGGTTCCTTGTGCTGGAAGGCGTGTTACATTTAAGGAACAGCCTACAGTAAATGAGATTGCAAGCACACCTAAGACTATTAAAGTTTTTTATGAGCTTGACAAAGATTTTAATACTATTTTAAACACTGCATGTGGAGTGTTTGAAGTAGATGATACCGTGGATATGGAGGAATTTTATGCTGTGGTGGTTGATGCCATAGAAGAGAAACTTTCTCCATGTAAGGAGCTTGAAGGTGTAGGTGCTAAAGTTAGTGCCTTTTTACAGAAATTAGAGGATAATTCCCTATTTTTATTTGATGAGGCTGGCGAGGAAGTTCTTGCTTCTAAATTGTATTGTGCTTTTACAGCTCCTGAAGATGATGACTTTCTTGAAGAAAGTGGTGTTGAAGAAGATGATGTAGAAGGTGAGGAAACTGATTTAACTGTCACAAGTGCTGGAGAGCCTTGTGTTGCCAGTGAACAGGAGGAGTCTTCTGAAATCTTAGAGGACACTTTGGATGATGGTCTATGTGTGGAGACATCTGATTCACAAGTTGAAGAAGATGTAGAAATGTCGGATTTTGCTGATCTTGAATCTGTGATTCAGGATTATGAAAATGTTTGTTTTGAGTTTTATACTACAGAGCCAGAATTTGTTAAAGTTTTGGATCTGTATGTGCCTAAAGCAACTCGCAACAATTGCTGGTTGCGATCAGTTTTGGCAGTGATGCAGAAACTGCCCTGTCAATTTAAAGACAAAAATTTGCAGGATCTTTGGGTGTTATATAAGCAACAGTATAGTCAGTTGTTTGTTGACACCTTGGTTAATAAGATACCTGCTAATATTGTAGTTCCACAAGGTGGTTATGTTGCCGATTTTGCATATTGGTTCTTAACCTTATGTGATTGGCAGTGTGTTGCATACTGGAAATGCATTAAATGTGATTTAGCTCTTAAGCTTAAAGGCTTGGATGCTATGTTCTTTTATGGTGATGTTGTCTCACATGTGTGCAAGTGTGGTGAGTCTATGGTACTTATTGATGTTGATGTGCCATTTACAGCCCACTTTGCTCTTAAAGATAAGTTGTTTTGTGCATTTATTACTAAGCGTAGTGTGTATAAAGCAGCTTGTGTTGTGGATGTTAATGATAGTCATTCTATGGCTGTTGTTGATGGTAAACAAATTGATGATCATCGTGTCACTAGTATTACTAGTGATAAGTTTGATTTTATTATTGGGCATGGTATGTCATTTTCAATGACTACTTTTGAAATTGCCCAATTGTATGGTTCTTGTATAACACCTAATGTATGTTTTGTTAAAGGTGATATAATTAAAGTTTCTAAGCGTGTTAAAGCAGAAGTCGTTGTAAATCCTGCTAATGGCCATATGGCACATGGTGGTGGTGTTGCAAAGGCTATTGCAGTAGCAGCTGGACAGCAGTTTGTTAAAGAGACTACCGATATGGTTAAGTCTAAAGGAGTTTGTGCTACTGGAGACTGTTATGTCTCTACAGGGGGTAAATTATGTAAAACTGTGCTTAATGTTGTTGGACCTGATGCGAGAACACAGGGTAAACAAAGTTATGCATTGTTAGAGCGTGTTTATAAACATCTTAACAAATATGATTGTGTTGTTACAACTTTGATATCAGCTGGTATATTTAGTGTGCCTTCTGATGTGTCTTTAACATATCTACTTGGTACTGCCGAGAAACAAGTTGTTCTTGTTAGCAATAATCAAGAGGATTTTGATCTTATTTCTAAGTGTCAGATAACTGCTGTTGAGGGCACTAAGAAATTGGCAGAGCGTCTTTCTTTTAATGTAGGGCGTTCTATCGTTTACGAAACAGATGCTAATAAGTTGATTTTAAGCAATGACGTTGCATTTGTTTCGACATTTAATGTCTTACAGGATGTTTTATCCTTAAGACATGATATAGCACTTGATGATGATGCACGAACCTTTGTTCAGAGCAATGTTGATGTTGTACCTGAGGGTTGGCGTGTTGTCAATAAGTTTTATCAAATTAATGGTGTTAGAACCGTTAAATATTTTGAGTGTCCCGGTGGCATAGATATATGCAGCCAGGATAAAGTTTTTGGTTATGTACAGCAGGGTAGTTTTAATAAGGCTACTGTTGCTCAAATTAAAGCCTTGTTTTTGGATAAAGTGGACATCTTGCTAACTGTTGATGGTGTTAATTTCACTAACAGGTTTGTGCCTGTAGGTGAAAGTTTTGGTAAGAGTCTAGGAAATGTGTTCTGTGATGGAGTTAATGTCACGAAACATAAGTGTGATATAAATTATAAAGGTAAAGTCTTTTTCCAGTTTGATAATCTTTCTAGTGAAGATTTAAAGGCTGTAAGAAGCTCTTTTAATTTTGACCAGAAGGAATTGCTTGCCTACTACAACATGCTTGTTAATTGTTCTAAATGGCAGGTTGTTTTTAATGGTAAGTATTTCACTTTTAAGCAAGCTAATAACAATTGTTTTGTTAATGTTTCTTGCTTAATGCTCCAGAGTTTGAATCTGAAATTTAAAATTGTTCAATGGCAGGAGGCGTGGCTTGAATTTCGTTCTGGCCGCCCTGCTAGATTTGTATCTTTGGTTTTGGCCAAAGGTGGGTTTAAATTTGGTGATCCTGCTGATTCTAGAGATTTCTTGCGTGTTGTGTTTAGTCAAGTTGATTTGACAGGGGCAATATGTGATTTTGAAATTGCATGTAAATGTGGTGTAAAGCAGGAACAGCGTACTGGTGTGGACGCTGTTATGCATTTTGGTACATTGAGTCGTGAAGATCTTGAGATTGGTTATACCGTGGATTGTTCTTGCGGTAAAAAGCTAATCCATTGTGTACGATTTGATGTACCATTTTTAATTTGTAGTAATACACCTGTTAGTGTAAAATTACCTAAGGGTGTAGGAAGTGCAAATATTTTTAAAGGTGATAAGGTTGGTCATTATGTTCATGTTAAGTGTGAACAGTCTTATCAGCTTTATGATGCTTCTAATGTTAAGAAGGTTACAGACGTTACTGGCAATTTGTCAGATTGTTTGTATCTTAAAAATTTGAAACAAACTTTTAAATCGGTGTTAACCACCTATTATTTGGATGATGTTAAGAAAATTGAGTATAAACCTGACTTGTCACAATATTATTGTGACGGAGGTAAGTATTATACTCAGCGTATTATTAAAGCCCAATTTAAAACATTTGAGAAAGTAGATGGTGTGTATACTAATTTTAAATTGATAGGACACACCATCTGTGATATTCTTAATGCTAAGTTGGGTTTTGATAGCTCTAAAGAGTTTGTTGAATATAAAGTTACTGAGTGGCCAACAGCTACAGGTGATGTGGTGTTGGCTACTGATGATTTGTATGTTAAGAGATATGAAAGGGGTTGTATTACTTTTGGTAAACCTGTTATATGGTTAAGCCATGAGCAAGCTTCCCTCAATTCTTTAACATATTTTAATAGACCTTTATTGGTTGATGAGAATAAATTTGATGTTTTAAAAGTGGATGATGTTGACGATGGTGGTGATATCTCAGAGAGTGATGCCAAAGAATCTAAAGAAATCAACATTATTAAGTTAAGTGGTGTTAAAAAACCATTTAAGGTTGAAGATAGTGTCATTGTTAATGATGATACTAGTGAAATCAAATATGTTAAGAGTTTGTCTATAGTTGATGTGTATGATATGTGGCTTACAGGTTGTAGGTATGTTGTTAGAACTGCTAATGCTTTGAGCATGGCAGTTAACGTACCTACAATACGTAAGTTTATAAAATTTGGTATGACTCTTGTTAGTATACCAATTGATTTGTTAAATTTAAGAGAGATTAAGCCTGTTTTTAATGTGGTTAAAGCTGTGCGAAATAAAATTTCTGCATGCTTTAATTTTATTAAATGGCTTTTTGTCTTATTATTTGGCTGGATTAAAATATCCGCTGATAATAAAGTAATTTACACCACAGAAGTTGCATCAAAGCTTACATGTAAGCTTGTAGCTTTAGCTTTTAAAAATGCGTTTTTGACATTTAAGTGGAGTGTGGTTGCTAGAGGTGCTTGCATTATAGCGACTATATTTCTATTGTGGTTTAATTTTATATATGCCAATGTAATTTTTAGTGATTTTTATTTGCCTAAAATTGGTTTCTTGCCGACTTTTGTTGGTAAGATCGTACAGTGGATTAAGAGCACTTTTAGTCTTGTAACTATTTGTGATCTATATTCCATTCAGGATGTGGGTTTTAAGAATCAGTATTGTAATGGAAGTATCGCATGTCAATTCTGCTTGGCAGGATTTGATATGTTAGATAATTATAAAGCCATTGATGTAGTACAGTATGAAGCTGATAGGAGAGCATTTGTTGATTATACAGGTGTGTTAAAGATTGTCATTGAATTGATAGTTAGTTACGCCCTGTATACGGCATGGTTCTACCCATTGTTTGCTCTTATTAGTATTCAGATCTTGACCACTTGGCTGCCTGAGCTTTTTATGCTTAGTACATTACATTGGAGTGTTAGGTTGCTGGTGTCTTTAGCTAATATGTTACCAGCACATGTGTTTATGAGGTTTTATATTATTATTGCCTCTTTTATTAAGCTGTTTAGCTTGTTTAGGCATGTTGCCTATGGTTGTAGTAAACCTGGTTGTTTGTTTTGTTACAAGAGGAATCGTAGTCTACGTGTTAAATGTAGTACTATTGTTGGTGGCATGATACGCTATTACGATGTTATGGCTAATGGTGGCACTGGCTTTTGTTCAAAACATCAATGGAATTGCATTGATTGTGATTCTTATAAACCAGGTAATACTTTTATTACTGTTGAGGCCGCTCTTGATTTATCTAAGGAATTGAAACGGCCTATTCAGCCTACAGATGTTGCTTATCATACGGTTACGGATGTTAAGCAAGTTGGTTGTTATATGCGCTTGTTCTATGAGCGTGATGGACAGCGCACATATGATGATGTTAATGCTAGTTTGTTTGTGGATTATAGTAATTTGCTACATTCTAAGGTTAAGGGTGTGCCTAATATGCATGTTGTGGTAGTGGAAAATGATGCCGATAAAGCTAATTTTCTTAATGCTGCTGTATTTTATGCACAGTCTTTGTTTAGACCTATTTTAATGGTTGATAAAAATCTGATAACTACTGCTAATACTGGTACGTCTGTTACAGAAACTATGTTTGATGTTTATGTTGACACATTTTTGTCTATGTTTGATGTGGATAAAAAGAGTCTTAATGCTTTAATAGCAACTGCGCATTCTTCTATAAAACAGGGTACGCAGATTTGTAAAGTTTTGGATACCTTTTTAAGCTGTGCTCGTAAAAGTTGTTCTATTGATTCAGATGTTGATACTAAGTGTTTAGCTGATTCTGTCATGTCTGCTGTATCGGCAGGCCTTGAATTGACGGATGAAAGTTGTAATAACTTGGTGCCAACATATTTGAAGGGTGATAACATTGTGGCAGCTGATTTAGGTGTTCTGATTCAAAATTCTGCTAAGCATGTGCAGGGTAATGTTGCTAAAATAGCCGGTGTTTCCTGTATATGGTCTGTGGATGCTTTTAATCAGCTAAGTTCTGATTTCCAGCATAAATTGAAGAAAGCATGTTGTAAAACTGGTTTGAAATTGAAGCTTACTTATAATAAGCAGATGGCTAATGTCTCTGTTTTAACTACACCCTTTAGTCTTAAAGGGGGTGCAGTTTTTAGTTATTTTGTTTATGTATGTTTTCTGTTGAGTTTGGTTTGTTTTATTGGATTGTGGTGCTTAATGCCCACTTACACAGTACACAAATCAGATTTTCAGCTTCCCGTTTATGCCAGTTATAAAGTTTTAGATAATGGTGTTATTAGAGATGTTAGCGTTGAAGATGTTTGTTTCGCTAACAAATTTGAACAATTTGATCAATGGTATGAGTCTACATTTGGTCTAAGTTATTATAGTAACAGTATGGCTTGTCCCATTGTTGTTGCTGTAGTAGACCAGGATTTTGGCTCTACTGTGTTTAATGTCCCTACCAAAGTGTTACGATATGGTTACCATGTGTTGCACTTTATTACACATGCACTTTCTGCTGATGGAGTGCAGTGTTATACGCCACATAGTCAAATATCGTATTCTAATTTTTATGCTAGTGGCTGTGTGCTTTCCTCCGCTTGTACTATGTTTGCAATGGCCGATGGTAGTCCACAACCTTATTGTTATACAGAGGGGCTTATGCAGAACGCTTCTCTGTATAGTTCATTGGTACCTCACGTGCGGTATAATCTTGCTAATGCTAAAGGTTTTATCCGTTTTCCAGAAGTGTTGCGAGAAGGACTTGTGCGTATTGTGCGTACTCGTTCTATGTCGTATTGCAGAGTTGGATTATGTGAGGAAGCTGATGAGGGTATATGCTTTAACTTTAATGGTTCTTGGGTGCTTAATAATGATTATTATAGATCATTGCCTGGGACCTTTTGTGGTAGAGATGTTTTTGACTTAATTTATCAGCTTTTTAAAGGTTTAGCACAGCCTGTGGATTTCTTGGCATTGACTGCTAGTTCTATTGCTGGTGCTATACTTGCTGTAATTGTTGTTTTGGTGTTTTATTACTTAATAAAGCTTAAACGTGCTTTTGGTGATTACACCAGTATTGTTTTTGTTAATGTGATTGTGTGGTGTGTAAATTTTATGATGCTTTTTGTGTTTCAAGTTTACCCTACACTTTCTTGTGTATATGCTATTTGTTATTTTTATGCCACGCTTTATTTCCCTTCGGAGATAAGTGTGATAATGCATTTACAATGGCTAGTTATGTATGGCACTATTATGCCTTTATGGTTTTGTTTGCTATATATATCTGTTGTTGTTTCAAATCATGCTTTTTGGGTATTCGCTTACTGCAGACGGCTTGGTACTTCTGTTCGTAGTGATGGTACATTTGAAGAAATGGCTCTTACTACTTTTATGATTACAAAAGATTCTTATTGTAAGCTTAAGAATTCTTTGTCTGATGTTGCTTTTAATAGATATTTGAGTTTGTATAATAAATATAGGTATTACAGCGGTAAAATGGATACTGCTGCATATAGGGAGGCTGCTTGTTCTCAGTTGGCTAAAGCAATGGATACATTTACCAATAATAATGGTAGTGATGTGCTTTACCAACCACCTACTGCTTCCGTTTCAACTTCATTCTTGCAATCTGGTATTGTGAAAATGGTTAATCCTACTTCTAAGGTAGAACCATGTATTGTCAGTGTTACCTATGGTAATATGACATTGAATGGTTTATGGTTGGATGATAAGGTCTACTGTCCCAGACATGTGATATGTTCTGCTTCAGATATGACTAATCCAGATTATACAAATTTGTTGTGTAGAGTAACATCAAGTGATTTTACTGTATTGTTTGATCGTTTAAGCCTTACAGTGATGTCTTATCAAATGCAGGGTTGTATGCTTGTTCTTACAGTGACCCTGCAAAATTCTCGTACGCCAAAATATACATTTGGTGTGGTTAAGCCTGGTGAGACTTTTACTGTTTTAGCTGCTTATAACGGCAAACCACAAGGAGCCTTTCATGTGACTATGCGTAGTAGTTATACCATTAAGGGTTCCTTTTTATGCGGATCTTGTGGATCTGTTGGTTATGTGCTAATGGGTGATTGTGTTAAATTTGTGTATATGCATCAATTGGAGCTTAGTACTGGTTGTCATACTGGTACTGATTTCAATGGGGATTTTTATGGTCCTTATAAGGATGCTCAGGTTGTCCAATTGCCCGTTCAGGATTATATACAATCTGTTAATTTTGTAGCATGGCTTTATGCTGCTATACTTAATAATTGTAATTGGTTTGTACAAAGTGATAAGTGTTCTGTTGAAGATTTTAATGTGTGGGCTTTGTCTAATGGGTTTAGCCAAGTTAAGTCTGATCTTGTTATAGATGCTTTAGCTTCTATGACTGGTGTGTCTTTGGAAACATTATTGGCTGCTATTAAGCGTCTCAAGAATGGTTTTCAAGGACGTCAGATTATGGGTAGTTGCTCCTTTGAGGATGAATTGACACCTAGCGATGTTTATCAACAACTCGCTGGTATCAAGTTACAATCAAAGCGTACTAGATTGGTTAAAGGCATTGTTTGTTGGATTATGGCTTCTACATTTTTGTTTAGTTGTATAATTACAGCATTTGTGAAATGGACTATGTTTATGTATGTAACTACTAATATGCTTAGTATTACGTTTTGTGCACTTTGTGTTATAAGTTTGGCCATGTTGTTGGTTAAACATAAGCATCTTTATTTGACTATGTATATAATTCCTGTGCTTTTTACACTGCTGTATAACAACTATTTGGTTGTGTACAAGCAGACATTTAGAGGCTATGTTTATGCATGGCTATCATATTATGTTCCATCAGTTGAGTATACTTATACTGATGAAGTTATTTATGGCATGTTATTGCTTATAGGAATGGTCTTTGTTACATTACGTAGCATTAACCATGATTTGTTCTCTTTTATAATGTTTGTTGGCCGTGTGATTTCTGTTGTCTCTTTGTGGTACATGGGTTCTAACTTAGAGGAAGAAATTCTTCTTATGTTGGCTTCTCTTTTTGGTACTTACACATGGACAACAGCTTTATCTATGGCTGCAGCAAAGGTTATTGCTAAGTGGGTTGCTGTGAATGTTTTGTATTTCACAGATATACCTCAAATTAAGATAGTGCTTGTATGCTATTTGTTTATAGGTTATATTATTAGCTGTTATTGGGGTTTGTTTTCCTTGATGAACAGTTTGTTTAGAATGCCTTTGGGTGTTTATAATTATAAAATTTCAGTACAGGAATTAAGATATATGAATGCTAATGGATTGCGCCCTCCTAAGAATAGTTTTGAAGCCCTTATGCTTAATTTTAAGCTTTTGGGTATTGGAGGTGTGCCAATTATTGAAGTATCTCAATTTCAATCAAAATTGACTGATGTTAAATGTGCTAATGTTGTCTTGCTTAATTGCTTGCAACATTTGCATGTTGCTTCTAACTCTAAGTTGTGGCAGTATTGTAGCACTTTGCACAATGAAATACTTGCCACTTCTGATCTGGGTGTTGCTTTTGAAAAGCTTGCTCAGTTGTTAATTGTTTTGTTTGCTAATCCAGCTGCTGTGGATAGCAAGTGCCTGACTAGTATTGAAGAAGTTTGCGACGATTACGCAAAGGACAATACTGTTTTGCAGGCTTTACAGAGTGAATTTGTTAATATGGCTAGCTTCGTTGAATATGAAGTTGCTAAGAAAAATCTTGATGAGGCGCGTTCTAGTGGTTCTGCTAATCAACAGCAGTTAAAACAGCTAGAGAAAGCCTGTAATATTGCTAAATCTGCTTATGAACGCGACCGTGCTGTAGCAAGAAAGTTGGAGCGTATGGCAGATTTGGCTCTCACTAATATGTATAAAGAAGCTAGAATTAATGATAAGAAGAGTAAGGTTGTTTCTGCCTTGCAAACTATGCTTTTTAGTATGGTGCGTAAGTTAGATAATCAAGCTCTGAATTCAATATTAGATAATGCTGTGAAGGGTTGTGTACCATTGAATGCAATCCCTTCATTGGCTGCAAATACTCTGACTATAATTGTACCAGATAAAAGTGTTTACGATCAGGTAGTTGACAATGTCTATGTTACCTATGCGGGTAATGTATGGCAGATTCAAACTATCCAAGATTCAGATGGTACAAATAAGCAGTTGAATGAGATATCTGATGATTGTAACTGGCCACTAGTTATTATTGCAAATCGGCATAATGAGGTATCTGCAACCGTTTTGCAAAATAATGAATTAATGCCTGCTAAGTTGAAAACTCAGGTCGTTAATAGTGGTCCAGATCAGACTTGTAACACACCTACTCAATGTTACTATAATAATAGTAACAATGGGAAGATTGTTTATGCTATACTTAGTGATGTTGATGGTCTTAAGTATACAAAGATTCTTAAAGATGATGGCAATTTTGTTGTTTTGGAGTTAGATCCTCCTTGTAAATTTACTGTTCAAGATGTTAAAGGTCTTAAAATTAAGTACCTTTATTTTGTAAAAGGTTGTAACACACTAGCAAGAGGCTGGGTTGTTGGTACAATTTCTTCTACAGTTAGATTGCAAGCTGGAACTGCTACTGAGTATGCTTCCAACTCATCTATATTATCTTTATGTGCGTTTTCTGTAGATCCTAAGAAAACGTATTTAGATTTTATACAGCAGGGAGGAACACCTATTGCCAATTGTGTTAAAATGTTGTGTGACCATGCTGGTACCGGTATGGCCATTACTGTTAAACCCGATGCTACCACTAATCAGGATTCATATGGTGGTGCGTCTGTTTGTATATATTGCCGCGCACGAGTTGAACACCCAGATGTTGATGGGTTGTGCAAATTACGCGGCAAGTTTGTACAAGTGCCTGTAGGTATAAAAGATCCTGTGTCTTATGTTTTGACACATGATGTTTGTCAAGTTTGTGGATTTTGGCGGGATGGAAGTTGTTCATGTGTTAGCACTGACACTACTGTTCAGTCAAAAGATACTAATTTTTTAAACCGGGGTACGAGTGTAGATGCCCGTCTCGTACCCTGTGCCAGTGGTTTATCTACTGATGTACAATTAAGGGCATTTGATATTTGCAATGCTAGTGTTGCTGGCATTGGTTTACATTTAAAAGTTAATTGCTGCCGTTTTCAGCGTGTTGATGAGAACGGTGATAAATTAGATCAGTTCTTTGTTGTTAAGAGGACAGATCTGACTATATATAATAGAGAGATGGAATGCTATGAGCGTGTAAAAGATTGTAAGTTTGTGGCTGAACACGATTTCTTTACATTTGATGTAGAAGGTAGTCGTGTGCCACATATTGTACGCAAGGATTTAACAAAGTATACTATGTTGGATCTTTGCTATGCGTTGCGACATTTTGATCGCAATGATTGCATGCTGCTTTGTGACATTCTCTCTATATATGCTGGTTGTGAACAATCCTACTTTACTAAGAAGGATTGGTATGATTTTGTTGAAAATCCTGATATTATTAATGTTTATAAAAAGCTAGGACCTATTTTTAATAGAGCCCTAGTTAGCGCTACTGAGTTTGCAGACAAATTGGTGGAGGTAGGCTTAGTAGGCATTTTAACACTTGATAACCAAGATTTAAATGGTAAATGGTATGATTTTGGTGACTATGTTATTGCAGCCCCAGGTTGTGGTGTTGCTATAGCAGACTCTTATTATTCTTATATGATGCCTATGCTGACCATGTGTCATGCATTGGATTGTGAATTGTATGTGAATAATGCTTATAGACTATTTGATCTTGTACAGTATGATTTTACTGATTACAAGCTCGAATTGTTTAATAAGTATTTTAAGCACTGGAGTATGCCATACCATCCTAACACGGTTGATTGTCAGGATGATCGGTGTATCATACATTGTGCTAATTTTAACATACTTTTTAGTATGGTTTTACCTAATACATGTTTTGGGCCTCTTGTTAGGCAAATTTTTGTGGATGGTGTTCCTTTTGTTGTTTCAATTGGATACCATTATAAAGAACTTGGTATTGTGATGAATATGGATGTGGATACACATCGTTATCGCTTGTCTTTAAAAGACTTGCTTTTATATGCTGCTGATCCAGCTTTGCATGTAGCTTCTGCTAGTGCATTGTATGATTTACGCACTTGCTGTTTTAGTGTTGCGGCTATAACAAGCGGTGTAAAATTTCAAACAGTTAAACCTGGTAATTTTAATCAGGATTTTTATGATTTTATTTTAAGTAAGGGCCTGCTTAAAGAGGGTAGTTCAGTTGATCTGAAGCACTTTTTCTTTACGCAGGATGGTAATGCTGCTATCACTGATTATAATTATTATAAGTACAATTTGCCCACCATGGTGGACATTAAGCAGTTGTTGTTTGTTTTGGAAGTTGTTTATAAGTATTTTGAGATTTATGATGGTGGGTGTATACCGGCATCACAAGTCATTGTTAATAATTATGATAAGAGTGCTGGCTATCCATTTAATAAATTTGGAAAAGCCAGGCTCTATTATGAAGCATTATCATTTGAGGAGCAGGATGAAATTTACGCCTATACTAAGCGCAATGTCCTGCCAACACTTACTCAAATGAATTTGAAATATGCTATTAGTGCTAAGAATAGAGCCCGCACTGTTGCTGGTGTTTCCATACTTAGTACTATGACTGGCAGAATGTTCCATCAAAAGTGTTTGAAAAGTATAGCAGCTACACGTGGTGTTCCTGTTGTTATAGGCACCACTAAATTTTATGGCGGCTGGGATGATATGTTACGTCGCCTTATTAAAGATGTTGATAATCCTGTACTTATGGGTTGGGATTATCCTAAGTGTGATCGTGCTATGCCAAACATACTACGTATTGTTAGTAGTCTGGTTTTGGCTCGAAAACATGAGGCATGTTGTTCGCAAAGCGATAGGTTTTATCGACTTGCGAATGAATGCGCACAAGTTCTGAGTGAAATTGTTATGTGTGGTGGCTGTTATTATGTTAAGCCTGGTGGCACTAGTAGTGGTGATGCAACTACTGCTTTTGCTAATTCAGTTTTTAACATATGTCAAGCTGTTTCAGCCAATGTATGTGCTTTAATGTCATGCAATGGTAATAAGATTGAAGATTTGAGTATACGTGCTCTTCAGAAGCGCTTATACTCACATGTGTATAGAAGTGATATGGTTGATTCAACCTTTGTCACAGAATATTATGAATTTTTAAATAAGCATTTTAGTATGATGATTTTGAGTGATGATGGCGTTGTGTGTTATAATTCTGATTATGCGTCCAAAGGGTATATTGCTAATATAAGTGCCTTTCAACAGGTATTGTATTATCAAAATAACGTTTTTATGTCAGAATCCAAATGTTGGGTTGAAAATGACATAAACAATGGACCTCATGAATTCTGTTCACAACACACAATGCTTGTAAAGATGGATGGGGACGATGTCTATCTTCCATATCCTGATCCTAGTCGTATATTAGGAGCTGGATGTTTTGTAGATGATTTGTTAAAGACTGATAGTGTTCTTTTAATAGAACGATTTGTAAGTCTTGCAATAGATGCTTATCCACTTGTGTACCACGAAAATGAAGAATACCAAAAGGTTTTTCGTGTTTATTTGGAGTATATAAAGAAGTTGTACAATGACCTGGGTAATCAGATCTTGGATAGCTACAGTGTTATTTTAAGTACTTGTGATGGACAAAAGTTTACTGATGAGTCCTTTTACAAGAACATGTATTTAAGAAGTGCAGTTATGCAGAGTGTTGGAGCTTGCGTGGTCTGCTCTTCTCAAACATCATTACGTTGTGGCAGTTGCATCAGAAAGCCTCTTCTTTGCTGCAAGTGTTGTTACGATCACGTTATGGCAACTGATCATAAATATGTTTTGAGTGTTTCACCATATGTGTGTAACGCACCAGGATGTGATGTAAATGATGTTACCAAATTGTATCTAGGTGGTATGTCATATTATTGTGAAGATCATAAGCCACAATATTCGTTTAAGTTGGTAATGAATGGTATGGTTTTTGGTCTATATAAACAATCTTGTACAGGATCTCCGTACATAGATGATTTTAATCGTATAGCTAGTTGTAAATGGACTGATGTTGATGATTACATACTGGCTAATGAATGTACAGAGCGCTTGAAATTGTTTGCTGCAGAAACGCAAAAGGCGACTGAGGAAGCCTTTAAGCAGAGTTATGCATCAGCAACAATACAAGAGATTGTTAGCGAGCGCGAATTGATCCTCTCTTGGGAGATTGGAAAAGTGAAGCCACCACTTAATAAAAATTATGTTTTTACTGGCTACCATTTTACTAAAAATGGCAAGACAGTTTTAGGTGAGTATGTTTTTGATAAGAGTGAGTTGACTAATGGTGTGTATTATCGCGCCACAACCACTTATAAGCTATCTGTAGGAGATGTTTTTGTTTTAACCTCTCATTCAGTAGCTAATTTAAGTGCTCCTACGCTTGTGCCGCAGGAGAATTATAGTAGTATTAGATTTGCTAGTGTTTATAGTGTGCTTGAGACGTTTCAGAACAATGTCGTTAATTATCAACACATTGGTATGAAACGTTATTGTACCGTGCAAGGACCTCCTGGTACAGGAAAGTCACATCTTGCTATTGGTCTTGCTGTTTATTATTGTACAGCACGTGTAGTATACACTGCGGCCAGCCATGCAGCTGTTGACGCATTGTGTGAAAAAGCATACAAATTTTTGAATATAAATGATTGCACTCGTATTGTTCCTGCCAAAGTCAGGGTGGAGTGCTATGATAAGTTTAAAATTAATGACACCACTCGTAAGTATGTGTTTACTACTATAAATGCATTACCTGAGATGGTGACTGATATTGTTGTTGTAGATGAAGTTAGTATGCTTACCAATTATGAGCTTTCTGTTATTAATGCTCGTATTCGTGCTAAGCATTATGTTTACATTGGTGATCCTGCTCAATTGCCAGCACCACGTGTGTTATTGAGCAAGGGTACACTTGAACCTAAATATTTTAACACTGTTACTAAGCTTATGTGTTGCTTAGGGCCAGACATTTTTCTTGGTACATGTTATAGATGTCCTAAGGAAATTGTTGATACAGTGTCTGCCTTGGTTTATGAAAATAAGCTTAAGGCTAAGAATGAAAGTAGTTCATTGTGTTTTAAGGTCTATTATAAAGGCGTTACAACACATGAAAGTTCTAGTGCTGTAAATATGCAGCAGATTTATTTGATTAATAAGTTTTTGAAGGCTAACCCTTTGTGGCATAAAGCCGTTTTTATTAGCCCATATAATAGCCAGAACTTTGCAGCTAAGCGTGTTTTGGGTTTGCAAACCCAGACCGTGGATTCTGCTCAAGGTTCTGAATATGATTATGTTATATATTCACAGACTGCAGAAACAGCGCATTCTGTAAATGTTAATCGCTTCAATGTTGCTATTACTCGAGCCAAGAAAGGTATTCTTTGTGTTATGAGTAATATGCAGTTGTTTGAAGCATTACAGTTTACTACATTGACCTTAGATAAAGTGCCACATGCCGTTGAAACGAGAGTTCAATGTAGTACTAATTTATTTAAAGATTGTAGCAAGAGTTATAGTGGTTACCACCCAGCTCACGCTCCTTCATTTTTGGCAGTAGATGACAAATATAAGGCAACTGGCGATTTAGCCGTGTGTCTTGGTATTGGAGATTCTGCTGTTACATATTCAAGATTAATATCACTCATGGGTTTTAAACTTGATGTCACCCTTGATGGGTATTGTAAGCTTTTTATAACTAAAGAAGAAGCTGTTAAACGCGTGCGTGCTTGGGTTGGCTTTGATGCTGAAGGCGCTCATGCCACGCGTGATAGCATTGGGACAAATTTCCCACTTCAATTAGGGTTTTCTACAGGAATTGATTTTGTTGTGGAAGCCACTGGTTTGTTTGCTGATAGAGATGGTTACAGCTTTAAAAAGGCTGTGGCTAAAGCTCCTCCTGGTGAACAATTTAAGCATCTCATCCCTTTGATGACGAGAGGTCAGCGTTGGGATGTTGTTAGACCTAGAATAGTACAAATGTTTGCAGATCATTTAATTGATCTGTCTGATTGTGTTGTGCTAGTTACATGGGCAGCCAACTTTGAGCTCACTTGTCTCCGATACTTTGCAAAAGTAGGTCGTGAGATCTCTTGTAATGTGTGCACTAAACGTGCCACAGCTTACAATTCTAGAACTGGTTACTATGGTTGTTGGCGCCATAGTGTTACATGTGATTACTTGTATAATCCACTTATTGTTGATATTCAACAGTGGGGATATATTGGATCTTTATCAAGTAATCATGATTTATATTGTAGTGTCCATAAAGGAGCACATGTTGCTTCATCTGATGCTATAATGACACGGTGTTTGGCCGTTTATGATTGTTTTTGCAATAATATTAATTGGAATGTGGAGTATCCCATTATTTCAAATGAGTTAAGTATTAATACCTCTTGTAGGGTCTTGCAGCGTGTTATGCTTAAAGCTGCAATGCTCTGCAACAGATATACTTTGTGTTATGATATTGGCAACCCAAAAGCGATTGCCTGTGTCAAAGATTTTGATTTTAAGTTCTATGATGCCCAACCAATTGTTAAGTCTGTCAAGACTCTTTTGTATTCTTTTGAGGCACATAAGGACTCTTTTAAAGATGGTTTGTGTATGTTTTGGAACTGTAATGTGGATAAGTATCCACCGAATGCAGTTGTATGTAGATTTGACACGAGAGTGTTGAATAATTTAAATCTTCCTGGCTGTAATGGAGGTAGTTTGTATGTTAATAAACATGCATTCCACACTAAACCCTTTTCTAGGGCAGCCTTTGAGCATTTGAAGCCTATGCCATTTTTCTATTATTCAGATACGCCTTGCGTGTATATGGATGGCATGGATGCTAAGCAGGTTGATTATGTACCTTTGAAATCCGCCACTTGCATCACAAGATGCAATTTAGGTGGTGCAGTTTGTTTAAAACATGCTGAAGAGTATCGTGAGTACCTAGAGTCTTACAATACAGCTACTACAGCAGGTTTTACTTTTTGGGTCTATAAGACATTTGATTTTTATAATTTGTGGAATACGTTCACCAAGCTACAAAGCTTGGAGAACGTTGTATATAATTTAGTCAAAACTGGTCATTATACAGGACAGGCTGGTGAAATGCCTTGTGCCATTATAAATGATAAAGTTGTGGCTAAGATCGATAAGGAGGATGTTGTCATTTTTATTAATAATACAACATACCCTACTAATGTGGCTGTTGAATTATTTGCCAAGCGCAGTATTCGACACCATCCAGAGCTTAAGCTCTTTAGAAATTTAAATATAGACGTGTGTTGGAAGCACGTCATTTGGGATTATGCTAGAGAAAGTATATTTTGCAGTAATACCTATGGTGTCTGCATGTATACAGATTTAAAGTTCATTGATAAATTGAATGTCCTTTTTGATGGTCGTGATAATGGTGCTCTTGAAGCTTTTAAACGCTCTAATAATGGCGTTTACATTTCCACGACAAAAGTTAAGAGTCTTTCGATGATAAAAGGTCCACCGCGTGCTGAATTAAATGGCGTAGTGGTGGACAAGGTTGGAGACACTGATTGTGTGTTTTATTTTGCTGTGCGTAAAGAGGGTCAGGATGTCATCTTCAGCCAATTCGACAGCCTGAGAGTCAGCTCTAACCAGAGCCCACAAGGTAATCTGGGGAGTAATGAACCCGGTAATGTCGGTGGTAATGATGCTCTGGCAACCTCCACTATCTTTACACAAAGCCGTGTTATTAGCTCTTTTACATGTCGTACTGATATGGAAAAAGATTTTATAGCTTTAGATCAAGACGTGTTTATTCAGAAGTATGGTTTGGAGGACTATGCCTTTGAACACATTGTTTATGGTAATTTCAACCAGAAGATTATTGGTGGTTTGCATTTGTTAATAGGCTTGTACCGAAGGCAGCAAACTTCCAATCTGGTTATTCAGGAGTTTGTTTCATACGACTCCAGCATACACTCTTATTTTATCACTGATGAGAAGAGTGGTGGTAGTAAGAGTGTTTGCACTGTTATAGATATTTTGTTGGATGATTTTGTGGCTCTTGTTAAGTCATTTAATCTCAACTGTGTGAGTAAGGTTGTTAACGTTAATGTTGATTTTAAAGATTTTCAGTTCATGCTTTGGTGTAACGATGAGAAAGTTATGACTTTCTATCCTCGTTTGCAAGCTGCATCTGACTGGAAGCCTGGTTATTCTATGCCTGTATTATACAAGTATTTGAATTCCCCAATGGAAAGAGTTAGTCTCTGGAATTATGGGAAGCCGGTTACTTTGCCTACAGGCTGTATGATGAATGTTGCTAAGTATACTCAGTTATGTCAATATCTGAATACTACAACATTAGCTGTACCTGTTAATATGCGAGTTTTGCATTTAGGTGCAGGTTCAGAAAAAGGAGTAGCACCGGGTTCTGCAGTTCTTAGGCAGTGGTTGCCTGCTGGTACTATTCTTGTAGATAATGATTTATACCCATTTGTGAGTGACAGTGTCGCTACATATTTTGGGGATTGTATAACCTTACCCTTTGATTGTCAATGGGATTTGATAATTTCTGATATGTATGACCCTATTACTAAGAACATAGGGGAGTACAATGTAAGTAAAGATGGTTTCTTTACATACATTTGTCATATGATTCGCGACAAGTTAGCTCTGGGTGGCAGTGTTGCTATAAAAATAACAGAGTTTTCTTGGAATGCAGAATTATATAAGTTAATGGGGTATTTTGCATTTTGGACGGTTTTCTGCACAAATGCAAACGCTTCTTCTAGTGAAGGGTTTTTAATTGGCATAAATTATTTGGGTAAGCCCAAGGTTGAGATAGATGGAAATGTTATGCATGCCAATTATTTGTTTTGGAGAAATTCCACAGTTTGGAACGGGGGTGCTTATAGCCTGTTTGACATGGCTAAATTCCCGCTTAAGTTGGCTGGTACTGCCGTAATAAATTTAAGAGCAGACCAGATTAATGATATGGTTTATTCCCTTCTTGAAAAGGGTAAACTACTTGTTAGAGATACAAATAAAGAAGTTTTTGTTGGTGACAGTTTGGTTAATGTAATCATGGCAGTCGCTTATGCAGACAAGCCTAATCACTTTATCAATTTTCCACTTACCCAGTTTCAGGGTTTTGTGTTAAATTATAAAGGTTTACAATTTCAACTTCTCGATGAAGGAGTGGATTGTAAAATACAAACAGCGCCTCACATTAGTCTTGCTATGCTGGATATTCAGCCTGAAGACTACAGAAGTGTTGATGTTGCTATTCAAGAAGTTATTGATGATATGCATTGGGGTGAGGGCTTTCAGATTAAATTTGAAAACCCCCATATCCTAGGAAGATGCATAGTTTTAGATGTTAAAGGTGTAGAAGAATTGCATGATGATTTAGTTAATTACATTCGTGATAAAGGTTGTGTTGCTGACCAATCCAGGAAGTGGATTGGACATTGCACCATAGCCCAACTCACTGATGCTGCACTTTCCATTAAGGAAAATGTTGATTTTATAAACAGCATGCAATTCAACTATAAAATCACTATCAATCCCTCATCACCGGCTAGACTTGAAATAGTTAAGCTTGGTGCTGAAAAGAAAGATGGTTTTTATGAAACCATAGCTAGCCACTGGATGGGAATTCGTTTTGAATATAATCCACCCACTGATAAGCTAGCTATGATTATGGGTTATTGTTGTTTAGAAGTGGTGCGTAAAGAGCTAGAAGAAGGTGACCTTCCCGAGAATGATGATGATGCTTGGTTTAAGCTATCGTACCATTATGAAAACAATTCTTGGTTCTTTCGACATGTCTACAGGAAAAGTTCTTATTTCCGTAAGTCTTGTCAAAATTTAGATTGTAATTGTTTGGGGTTTTATGAATCTTCAGTTGAAGAAGACATGTTTTTGATACTTTTAATTTCCTTACCCACGGCTTTTGCTGTTATAGGAGATTTAAAGTGTACTACAGTCTCCATTAATGATGTTGACACTGGTGTTCCTTCTATTAGCACTGATACTGTCGATGTTACTAATGGTTTAGGTACTTATTATGTTTTAGATCGTGTGTATTTAAATACTACGTTGTTGCTTAATGGTTACTACCCTACTTCAGGTTCTACATATCGTAATATGGCACTGAAGGGAACTTTACTATTGAGCACACTGTGGTTTAAACCACCTTTTCTTTCTGATTTTACTAATGGTATTTTTGCTAAGGTCAAAAATACCAAGGTTGTTAAAGATGGTGTAATGTATAGTGAGTTTCCTGCTATAACTATAGGTAGTACTTTTGTAAATACATCTTATAGTGTGGTAGTACAACCACATACTACCATTTTGGGTAATAAATTACAAGGTTTCTTAGAGATCTCTGTTTGCCAGTATACTATGTGCGAGTACCCAAATACGATTTGTAATCCTAATCTGGGCAATCAACGCGTAGAACTATGGCATTGGGATACAGGTGTTGTTTCCTGTTTATATAAGCGTAATTTCACATACGATGTGAATGCTGATTATTTGTATTTCCATTTTTATCAAGAAGGTGGTACTTTTTATGCATATTTTACAGACACTGGTGTTGTTACTAAGTTTCTGTTTAATGTTTATTTAGGCACGGTGCTCTCACATTATTATGTCATGCCTTTGACTTGTAATAGTGCTCTGACTTTAGAATATTGGGTTACACCCCTCACTTCTAAACAATATCTACTAGCTTTCAATCAAGATGGTGTTATTTTTAATGCTGTTGATTGTAAGAGTGATTTTATGAGTGAGATTAAGTGTAAAACACTATCTATAGCACCATCTACTGGTGTTTATGAATTAAACGGTTACACTGTTCAGCCAATTGCAGATGTTTACCGACGTATACCTAATCTTCCCGATTGCAATATTGAGGCTTGGCTTAATGATAAGTCGGTGCCCTCTCCATTAAATTGGGAACGTAAGACCTTTTCAAATTGTAATTTTAATATGAGCAGCCTGATGTCTTTTATTCAGGCAGACTCATTTACTTGTAATAATATTGATGCTGCTAAGATATATGGCATGTGTTTTTCCAGCATAACTATAGATAAGTTTGCAATACCCAATGGTAGGAAGGTTGACCTACAATTGGGTAATTTGGGTTATTTGCAGTCTTTTAACTATAGAATTGATACTACTGCTACAAGTTGTCAGTTGTATTATAATTTACCTGCTGCTAATGTTTCTGTTAGCAGGTTTAATCCTTCTACTTGGAATAGGAGATTTGGTTTTACAGAACAATCTGTTTTTAAGCCTCAACCTGCAGGTGTTTTTACTGATCATGATGTTGTTTATGCACAACATTGTTTTAAAGCTCCCACAAATTTCTGTCCGTGTAAATTGGATGGGTCTTTGTGTGTAGGTAGTGGTTCTGGTATAGATGCTGGTTATAAAAATACTGGTATAGGCACTTGTCCTGCAGGTACTAATTATTTAACTTGCCATAATGCTGCCCAATGTAATTGTTTGTGCACTCCAGACCCCATTACATCTAAAGCTACAGGGCCTTACAAGTGCCCCCAAACTAAATATTTAGTTGGTATAGGTGAGCACTGTTCGGGTCTTGCTATTAAAAGTGATCATTGTGGAGGTAATCCTTGTAGTTGCCAACCACAAGCATTTTTGGGTTGGTCTGTTGACTCTTGTTTACAAGGGGATAGGTGTAATATTTTTGCTAATTTTATTTTGCATGATGTTAATAGTGGTACTACTTGTTCTACTGATTTACAAAAATCAAACACAGACATAATTCTTGGTGTTTGTGTTAATTATGATCTTTATGGTATTACTGGCCAAGGGATTTTTGTTGAGGTCAATGCGACTTATTATAATAGTTGGCAGAACCTTTTATATGATTCTAATGGTAATCTCTATGGTTTTAGAGACTACTTAACAAATAGAACTTTTATGATTCGTAGTTGCTATAGTGGTCGTGTTTCAGCGGCCTTTCATGCTAACTCTTCCGAACCAGCATTGCTATTTCGGAATATCAAATGCAATTACGTTTTTAATAACACTCTTTCACGACAGCTGCAACCTATTAACTATTTTGATAGCTATCTTGGTTGTGTTGTCAATGCTGATAATAGTACTTCTAGTGTTGTTCAAACATGTGATCTCACAGTAGGTAGTGGTTACTGTGTGGATTACTCTACAAAAAGACGAAGTCGTAGATCGATTACCACTGGTTATCGGTTTACTAATTTTGAGCCATTTACTGTTAATTCAGTAAATGATAGTTTAGAACCTGTAGGTGGTTTGTATGAAATTCAAATACCTTCAGAGTTTACTATAGGTAATATGGAGGAGTTTATTCAAACAAGCTCTCCTAAAGTTACTATTGATTGTTCTGCTTTTGTTTGTGGTGATTATGCAGCATGTAAATCACAGTTGGTTGAATATGGTAGCTTCTGTGACAATATTAATGCTATACTCACAGAAGTAAATGAACTACTTGACACTACACAGTTGCAAGTAGCTAATAGTTTAATGAATGGTGTCACTCTTAGCACTAAGCTTAAAGATGGCGTTAATTTCAATGTAGACGACATCAATTTTTCCCCTGTATTAGGTTGTTTAGGAAGCGATTGCAATAAAGTTTCCAGTAGATCTGCTATAGAGGACTTACTTTTTTCTAAAGTAAAGTTATCTGATGTCGGTTTCGTTGAGGCTTATAATAATTGTACTGGAGGTGCCGAAATTAGGGACCTCATTTGTGTGCAAAGTTATAATGGTATCAAGGTGTTGCCTCCACTGCTCTCAGAAAATCAGATCAGTGGATACACTTTGGCTGCCACCTCTGCTAGCCTGTTTCCTCCATGGTCAGCAGCAGCAGGTGTACCATTCTATTTAAATGTTCAGTATCGTATTAATGGTATTGGTGTTACCATGGATGTGCTAAGTCAAAATCAAAAGCTTATTGCTAATGCATTTAACAATGCTCTTGGTGCTATTCAGGAAGGGTTTGATGCTACCAATTCTGCTTTAGTTAAAATTCAAGCTGTTGTTAATGCAAATGCTGAAGCTATTAATAACTTATTGCAACAACTCTCTAATAGATTTGGTGCTATAAGTTCTTCTTTACAAGAAATTCTATCTAGACTGGATGCTCTTGAAGCGCAAGCTCAGATAGACAGACTTATTAATGGGCGTCTTACCGCTCTTAATGCTTATGTTTCTCAACAGCTTAGTGACTCTACACTAGTAAAGTTTAGTGCAGCACAAGCTATGGAGAAGGTTAATGAATGTGTCAAAAGCCAATCATCTAGGATAAATTTTTGTGGTAATGGTAATCATATTATATCATTAGTGCAGAATGCTCCATATGGTTTGTATTTTATCCACTTTAGCTATGTCCCTACTAAGTATGTCACAGCGAAGGTTAGTCCCGGTCTGTGCATTGCTGGTGGTAGAGGTATAGCCCCTAAGAGTGGTTATTTTGTTAATGTAAATAATACTTGGATGTTCACTGGTAGTGGTTATTACTACCCTGAACCTATAACTGGAAATAATGTTGTTGTTATGAGTACCTGTGCTGTTAATTATACTAAAGCGCCGGATGTAATGCTGAACATTTCAACACCCAACCTCCCTGATTTTAAGGAAGAGTTGGATCAATGGTTTAAAAACCAAACCTCAGTGGCACCAGATTTGTCACTTGATTATATAAATGTTACATTCTTGGACCTACAAGATGAAATGAATAGGTTACAGGAGGCAATAAAAGTTTTAAATCAGAGCTACATCAATCTCAAGGACATTGGTACTTATGAGTATTATGTAAAATGGCCTTGGTATGTATGGCTTTTAATTGGCTTTGCAGGTGTAGCTATGCTTGTTTTACTATTCTTCATATGCTGTTGTACAGGATGTGGGACTAGTTGTTTTAAGAAATGTGGTGGTTGTTGTGATGATTATACAGGACACCAGGAGTTAGTAATTAAAACATCACATGAAGACATGTTTTTGCTTCCTAGATTTGTTCTAGTTAGCTGCATAATTGGTAGCCTAGGTTTTGACAACCCTCCTACCAATGTTGTTTCGCATTTAAATGGAGATTGGTTTTTATTTGGTGACAGTCGTTCAGATTGTAATCATGTTGTTACTACCAACCCCCGTAATTATTCTTATATGGACCTTAATCCTGCCTTGTGTGGTTCTGGTAAAATATCATCTAAAGCTGGCAACTCCATTTTTAGGAGTTTTCACTTTACCGATTTTTATAATTACACAGGCGAAGGTCAACAAATTATTTTCTATGAGGGTGTTAATTTTACGCCTTATCATGCCTTTAAATGCACCACTTCTGGTAGTAATGATATTTGGATGCAGAATAAAGGCTTGTTTTACACTCAGGTTTATAAGAATATGGCTGTGTATCGCAGCCTTACTTTTGTTAATGTACCATATGTTTATAATGGCTCTGCACAATCTACAGCCATTTGTAAATCTGGTAGTTTAGTTCTTAATAACCCTGCATATATAGCTCGTGAAGCTAATTTTGGGGATTATTATTATAAGGTTGAAGCTGATTTTTATTTGTCAGGTTGTGACGAGTATATCGTACCACTTTGTATTTTCAACGGCAAGTTTTTGTCGAATACAAAGTATTATGATGATAGTCAATATTATTTTAATAAAGACACTGGTGTTATTTATGGTCTCAATTCTACTGAAACCATTACCACTGGTTTTGACTTTAATTGTCATTATTTAGTTCTACCCTCTGGTAATTATTTAGCCATTTCAAATGAGCTATTGTTAACTGTTCCTACTAAAGCAATCTGTCTTAATAAGCGTAAGGATTTTACGCCTGTACAGGTTGTTGATTCGCGGTGGAACAATGCCAGGCAGTCTGATAACATGACGGCAGTTGCTTGTCAACCCCCGTACTGTTATTTTCGTAATTCTACTACCAATTATGTTGGTGTTTATGATATCAATCATGGGGATGCTGGTTTTACTAGCATACTCAGTGGTTTGTTATATGACTCACCTAGTTTTTCGCAGCAAGGTGTTTTTAGGTATGATAATGTTAGCAGTGTCTGGCCTCTCTACCCCTATGGCAGATGCCCTACTGCTGCTGATATTAATACCCCTGATGTACCTATTTGTGTGTATGATCCGCTACCAATTATTTTGCTTGGCATTCTTTTGGGTGTTGCGGTCATAATTATTGTAGTTTTGTTGTTATATTTTATGGTGGATAATGGTACTAGGCTGCATGATGCTATGTTTATGGCTGATGCTTATTTTGCAGACACTGTGTGGTATGTGGGGCAAATAATTTTTATAGTTGCCATTTGTTTATTGGTTATAATAGTTGTAGTGGCATTTTTGGCAACTTTTAAATTGTGTATTCAACTTTGCGGTATGTGTAATACCTTAGTACTGTCCCCTTCTATTTATGTGTTTAATAGAGGTAGGCAGTTTTATGAGTTTTACAATGATGTAAAACCACCAGTTCTTGATGTGGATGACGTTATGAGTAGTGTAACTACACCAGCACCAGTTTACACCTGGACTGCTGATGAAGCTATTAAATTCCTAAAGGAATGGAACTTTTCTTTGGGTATTATACTACTTTTTATTACAGTCATATTGCAATTTGGATATACAAGTCGCAGTATGTTTGTTTATGTTATTAAGATGATCATTTTGTGGCTTATGTGGCCCCTTACTATCATCTTAACTATTTTCAATTGCGTGTATGCGTTGAATAATGTGTATCTTGGCTTCTCTATAGTTTTTACTATAGTGGCCATTATCATGTGGATTGTGTATTTTGTGAATAGTATCAGGTTGTTTATTAGAACTGGAAGTTGGTGGAGTTTCAACCCAGAAACAAACAACTTGATGTGTATAGATATGAAGGGAAGGATGTATGTTAGGCCGATAATTGAGGACTACCATACCCTTACGGTCACAATAATACGTGGTCATCTTTACATGCAAGGTATAAAACTAGGTACTGGCTATTCTTTGTCAGATTTGCCAGCTTATGTGACTGTTGCTAAGGTCTCGCACCTGCTCACGTATAAGCGTGGTTTTCTTGACAAGATAGGCGATACTAGTGGTTTTGCTGTTTATGTTAAGTCCAAAGTCGGTAATTACCGACTGCCATCAACCCAAAAGGGTTCTGGCTTGGACACCGCATTGTTGAGAAATAATATCATGTCTTTTACTCCTGGTAAGCAATCCAGTAGTAGAGCGTCCTCTGGAAATCGTTCTGGTAATGGCATCCTTAAGTGGGCCGATCAGTCCGACCAATCTAGAAATGTTCAAACCAGGGGTAGAAGAGCTCAACCCAAGCAAACTGCTACTTCTCAGCAACCATCAGGAGGGAATGTTGTACCCTACTATTCTTGGTTCTCTGGAATTACTCAGTTTCAAAAGGGAAAGGAGTTTGAATTTGCAGAGGGACAAGGTGTGCCTATTGCACCAGGAGTCCCAGCTACTGAAGCTAAGGGGTACTGGTACAGACACAACCGACGTTCCTTTAAAACAGCCGATGGCAACCAGCGTCAATTGCTGCCACGATGGTATTTTTACTATCTTGGAACAGGACCGCATGCCAAAGACCAGTATGGCACCGACATTGACGGAGTCTACTGGGTCGCTAGTAACCAGGCTGATGTCAATACCCCGGCTGACATTCTCGATCGGGACCCAAGTAGCGATGAGGCTATTCCGACTAGGTTTCCGCCTGGCACGGTACTCCCTCAGGGTTACTATATTGAAGGCTCAGGAAGGTCTGCTCCTAATTCCAGATCTACTTCACGCGCATCCAGTAGAGCCTCTAGTGCAGGATCGCGCAGTAGAGCCAATTCTGGCAATAGAACCCCTACCTCTGGTGTAACACCTGATATGGCTGATCAAATTGCTAGTCTTGTTCTGGCAAAACTTGGCAAGGATGCCACTAAGCCACAGCAAGTAACTAAGCAGACTGCCAAAGAAATCAGACAGAAAATTTTGAATAAGCCCCGCCAGAAGAGGAGCCCCAATAAACAATGCACTGTTCAGCAGTGTTTTGGGAAGAGAGGCCCCAATCAGAATTTTGGTGGTGGAGAAATGTTAAAACTTGGAACTAGTGATCCACAGTTCCCCATTCTTGCAGAACTCGCACCCACAGCTGGTGCGTTTTTCTTTGGATCAAGATTAGAGTTGGCCAAAGTGCAGAATTTGTCTGGGAATCTTGACGAGCCCCAGAAGGATGTTTATGAATTGCGCTATAATGGCGCAATTAGATTTGATAGTACACTTTCAGGTTTTGAGACCATAATGAAGGTGTTGAATGAGAATTTGAATGCATACCAACAACAGGATGGTACGATGAATATGAGTCCAAAACCACAGCGTCAGCGTGGTCAGAAGAACGGACAAGGAGAAAATGATAATATAAGTGTTGCAGCGCCCAAAAGCCGTGTGCAGCAAAATAAGATTAGAGAGTTGACTGCAGAGGACATCAGCCTTCTTAAGAAGATGGATGAGCCCTTTACTGAAGACACCTCAGAAATA
>gi|145208884|gb|EF424615.1|_Bovine_coronavirus_E-AH65_complete_genome
ATGTCGAAGATCAACAAATACGGTCTCGAACTACACTGGGCTCCAGAATTTCCATGGATGTTTGAGGACGCAGAGGAGAAGTTGGACAACCCTAGTAGTTCAGAGGTGGATATAGTATGCTCCACCACTGCGCAAAAGCTGGAAACAGGCGGAATTTGTCCTGAAAATCATGTGATGGTGGATTGTCGCCGACTTCTTAAACAAGAATGTTGTGTGCAGTCTAGCCTAATACGTGAAATTGTTATGAATACACGTCCATATGATTTGGAGGTGCTACTTCAAGATGCTTTGCAGTCCCGCGAAGCAGTTTTGGTTACACCCCCTCTAGGTATGTCTCTGGAGGCATGCTATGTGAGAGGTTGTAATCCTAATGGATGGACCATGGGTTTGTTTCGGCGTAGAAGTGTGTGTAACACTGGTCGCTGCGCTGTTAACAAGCATGTGGCCTATCAGCTATATATGATTGATCCTGCGGGTGTCTGTTTTGGTGCAGGTCAATTTGTGGGTTGGGTTATACCCTTAGCCTTTATGCCTGTGCAATCCCGGAAATTTATTGTTCCTTGGGTTATGTACTTGCGTAAGTGTGGCGAAAAGGGTGCCTACAACAAAGATCATAAACGTGGCGGTTTTGAACACGTTTATAATTTTAAAGTTGAGGATGCTTACGACTTGGTTCATGATGAGCCTAAGGGTAAGTTTTCTAAGAAGGCTTATGCTTTAATTAGAGGATACCGTGGTGTTAAACCGCTTCTTTATGTAGACCAGTATGGTTGTGATTATACTGGTGGTCTTGCAGATGGCTTAGAGGCTTATGCTGATAAGACATTGCAAGAAATGAAGGCATTATTTCCTATTTGGAGCCAGGAACTCCCTTTTGATGTAACTGTGGCATGGCACGTTGTGCGTGATCCACGTTATGTTATGAGACTGCAGAGTGCTTCTACTATACGTAGTGTTGCATATGTTGCTAACCCTACTGAAGACTTGTGTGATGGTTCTGTTGTCATAAAGGAACCTGTGCATGTTTATGCGGATGACTCTATTATTTTACGTCAACATAATTTAGTTGACATTATGAGTTGTTTTTATATGGAGGCAGATGCAGTTGTAAATGCTTTTTATGGTGTTGATTTGAAAGATTGTGGTTTTGTTATGCAGTTTGGTTATATTGACTGCGAACAAGACTTGTGTGATTTTAAAGGTTGGGTTCCTGGTAATATGATAGATGGTTTTGCTTGCACTACTTGTGGTCATGTCTATGAGACAGGTGATTTGCTAGCACAATCTTCAGGTGTTCTGCCTGTTAATCCTGTATTGCATACTAAGAGTGCAGCAGGTTATGGTGGTTTTGGTTGTAAGGATTCTTTTACCCTGTATGGCCAAACTGTAGTCTATTTTGGAGGTTGTGTGTATTGGAGTCCAGCACGTAATATATGGATTCCTATATTAAAATCTTCTGTTAAGTCTTATGACGGTTTGGTTTATACTGGAGTTGTAGGTTGCAAGGCTATTGTAAAGGAAACAAATCTCATTTGCAAAGCGTTGTACCTTGATTATGTTCAACACAAGTGTGGCAATTTACACCAGCGGGAGTTGCTAGGTGTGTCAGATGTGTGGCATAAACAATTGTTATTAAATAGAGGTGTGTACAAACCTCTTTTAGAGAATATTGATTATTTTAATATGCGGCGCGCTAAATTTAGTTTAGAAACTTTTACTGTTTGTGCAGATGGTTTTATGCCTTTTCTTTTAGATGATTTGGTTCCGCGCGCATATTATTTGGCAGTAAGTGGTCAAGCATTTTGTGACTACGCAGATAAAATCTGCCATGCTGTTGTGTCTAAGAGTAAAGAGTTACTTGATGTGTCTCTGGATTCTTTAAGTGCAGCTATACATTATTTGAATTCTAAAATTGTTGATTTGGCTCAACATTTTAGTGATTTTGGAACAAGTTTTGTTTCTAAAATTGTTCATTTCTTTAAGACTTTTACTACTAGCACTGCTCTTGCATTTGCATGGATTTTATTTCATGTTTTGCATGGTGCTTATATAGTAGTAGAGAGTGATATATATTTTGTTAAAAACATTCCTCGTTATGCTAGTGCTGTTGCACAAGCATTTCGGAGTGTTGCTAAAGTTGTACTGGACTCTTTAAGAGTTACTTTTATTGATGGCCTTTCTTGTTTTAAGATTGGACGTAGAAGAATTTGTCTCTCAGGCAGTAAAATTTATGAAGTTGAGCGTGGCTTGTTACATTCATCTCAATTGCCATTAGATGTTTATGATTTAACCATGCCTAGTCAAGTTCAGAAAGCCAAGCAAAAACCTATTTATTTAAAAGGTTCTGGTTCTGATTTTTCATTAGCAGATAGTGTGGTTGAAGTTGTTACAACTTCACTTACACCATGTGGTTATTCTGAACCACCTAAAGTTGCAGATAAAATTTGCATTGTGGATAATGTTTATATGGCCAAGGCTGGTGACAAATATTACCCTGTTGTGGTTGATGGTCATGTAGGACTCTTGGATCAAGCATGGAGGGTTCCTTGTGCTGGAAGGCGTGTTACATTTAAAGAACAGCCTACAGTAAATGAGATTGCAAGCACACCTAAGACTATTAAAGTTTTTTATGAGCTTGACAAAGATTTTAATACTATTTTAAACACTGCATGTGGAGTGTTTGAAGTAGATGATACCGTGGATATGGAGGAATTTTATGCTGTTGTGGTTGATGCCATAGAAGAGAAACTTTCTCCATGTAAGGAGCTTGAAGGTGTAGGTGCTAAAGTTAGTGCCTTTTTACAGAAATTAGAGGATAATTCCCTATTTTTATTTGATGAGGCTGGCGAGGAAGTTCTTGCTTCTAAATTGTATTGTGCTTTTACAGCTCCTGAAGATGATGACTTTTTTGAAGAAAGTGGTGTTGAAGAAGATGATGTAGAAGGTGAGGAAACTGATTTAACTGTCACAAGTGCTGGAGAGCCTTGTGTTGCCAGTGAACAGGAGGAGTCTTCTGAAATCTTAGAGGACACTTTGGATGATGGTCCATGTGTGGAGACATCTGATTCACAAGTTGAAGAAGATGTAGAAATGTCGGATTTTGCTGATCTTGAATCTGTGATTCAGGATTATGAAAATGTTTGTTTTGAGTTTTATACTACAGAGCCAGAATTTGTTAAAGTTTTGGATCTGTATGTGCCTAAAGCAACTCGCAACAATTGCTGGTTGCGATCAGTTTTGGCAGTGATGCAGAAACTGCCCTGTCAATTTAAAGATAAAAATTTGCAGGATCTTTGGGTGTTATATAAGCAACAGTATAGTCAGTTGTTTGTTGACACCTTGGTTAATAAGATACCTGCTAATATTGTAGTTCCACAAGGTGGTTATGTTGCCGATTTTGCATATTGGTTCTTAACCTTATGTGATTGGCAGTGTGTTGCATACTGGAAATGCATTAAATGTGATTTAGCTCTTAAGCTTAAAGGCTTGGATGCTATGTTCTTTTATGGTGATGTTGTTTCACATGTGTGCAAGTGTGGTGAGTCTATGGTACTTATTGATGTTGATGTGCCATTTACAGCCCACTTTGCTCTTAAAGATAAGTTGTTTTGTGCATTTATTACTAAGCGTAGTGTGTATAAAGCAGCTTGTGTTGTGGATGTTAATGATAGTCATTCTATGGCTGTTGTTGATGGTAAACAAATTGATGATCATCGTGTCACTAGTATTACTAGTGATAAGTTCGATTTTATTATTGGGCATGGTATGTCATTTTCAATGACTACTTTTGAAATTGCCCAATTGTATGGTTCTTGTATAACACCTAATGTATGTTTTGTTAAAGGTGATATAATTAAAGTTTCTAAGCGTGTTAAAGCAGAAGTCGTTGTAAATCCTGCTAATGGCCATATGGCACATGGTGGTGGTGTTGCAAAGGCTATTGCAGTAGCAGCTGGACAGCAGTTTGTTAAAGAGACTACCGATATGGTTAAGTCTAAAGGAGTTTGTGCTACTGGAGACTGTTATGTCTCTACAGGGGGTAAATTATGTAAAACTGTGCTTAATGTTGTTGGACCTGATGCGAGAACACAGGGTAAACAAAGTTATGCATTGTTAGAGCGTGTTTATAAACATCTTAACAAATATGATTGTGTTGTTACAACTTTGATATCAGCTGGTATATTTAGTGTGCCTTCTGATGTGTCTTTAACATATCTACTTGGTACTGCCGAGAAACAAGTTGTTCTTGTTAGCAATAATCAAGAGGATTTTGATCTTATTTCTAAGTGTCAGATAACTGCTGTTGAGGGCACTAAGAAATTGGCAGAGCGTCTTTCTTTTAATGTAGGGCGTTCTATCGTTTACGAAACAGATGCTAATAAGTTGATTTTAAGCAATGACGTTGCATTTGTTTCGACATTTAATGTCTTACAGGATGTTTTATCCTTAAGACATGATATAGCACTTGATGATGATGCACGAACCTTTGTTCAGAGCAATGTTGATGTTGTACCTGAGGGTTGGCGTGTTGTCAATAAGTTTTATCAAATTAATGGTGTTAGAACCGTTAAGTATTTTGAGTGTCCTGGTGGCATAGATATATGCAGCCAGGATAAAGTTTTTGGTTATGTACAGCAGGGTAGTTTTAATAAGGCTACTGTTGCTCAAATTAAAGCCTTGTTTTTGGATAAAGTGGACATCTTGCTAACTGTTGATGGTGTCAATTTCACTAACAGGTTTGTGCCTGTAGGTGAAAGTTTTGGTAAGAGTCTAGGAAATGTGTTCTGTGATGGAGTTAATGTCACGAAACATAAGTGTGATATAAATTATAAAGGTAAAGTCTTTTTCCAGTTTGATAATCTTTCTAGTGAAGATTTAAAGGCTGTAAGAAGTTCTTTTAATTTTGACCAGAAGGAATTGCTTGCCTACTACAACATGCTTGTTAATTGTTCTAAATGGCAGGTTGTTTTTAATGGTAAGTATTTCACTTTTAAGCAAGCTAATAACAATTGTTTTGTTAATGTTTCTTGCTTAATGCTCCAGAGTTTGAATCTGAAATTTAAAATTGTTCAATGGCAGGAGGCGTGGCTTGAATTTCGTTCTGGCCGCCCTGCTAGATTTGTATCTTTGGTTTTGGCCAAGGGTGGGTTTAAATTTGGTGATCCTGCTGATTCTAGAGATTTCTTGCGTGTTGTGTTTAGTCAAGTTGATTTGACAGGGGCAATATGTGATTTTGAAATTGCATGTAAATGTGGTGTAAAGCAGGAACAGCGTACTGGTGTGGACGCTGTTATGCATTTTGGTACATTGAGTCGTGAAGATCTTGAGATTGGTTATACCGTGGATTGTTCTTGCGGTAAAAAGCTAATCCATTGTGTACGATTTGATGTACCATTTTTAATTTGTAGTAATACACCTGCTAGTGTAAAATTACCTAAGGGTGTAGGAAGTGCAAATATTTTTAAAGGTGATAAGGTTGGTCATTATGTTCATGTTAAGTGTGAACAGTCTTATCAGCTTTATGATGCTTCTAATGTTAAGAAGGTTACAGACGTTACTGGCAATTTGTCAGATTGTTTGTATCTTAAAAATTTGAAACAAACTTTTAAATCGGTGTTAACCACCTATTATTTGGATGATGTTAAGAAAATTGAGTATAAACCTGACTTGTCACAATATTATTGTGACGGAGGTAAGTATTATACTCAGCGTATTATTAAAGCCCAATTTAAAACATTTGAGAAAGTAGATGGTGTGTATACTAATTTTAAATTGATAGGACACACCATCTGTGATATTCTTAATGCTAAGTTGGGTTTTGATAGCTCTAAAGAGTTTGTTGAATATAAAGTTACTGAGTGGCCAACAGCTACAGGTGATGTGGTGTTGGCTACTGATGATTTGTATGTTAAGAGATATGAAAGGGGTTGTATTACTTTTGGTAAACCTGTTATATGGTTAAGCCATGAGCAAGCTTCCCTCAATTCTTTAACATATTTTAATAGACCTTTATTGGTTGATGAGAATAAATTTGATGTTTTAAAAGTGGATGATGTTGACGATGGTGGTGATATCTCAGAGAGTGATGCCAAAGAATCTAAAGAAATCAACATTATTAAGTTAAGTGGTGTTAAAAAACCATTTAAGGTTGAAGATAGTGTCATTGTTAATGATGATACTAGTGAAATCAAATATGTTAAGAGTTTGTCTATAGTTGATGTGTATGATATGTGGCTTACAGGTTGTAGGTATGTTGTTAGAACTGCTAATGCTTTGAGCATGGCAGTTAACGTACCTACAATATGTAAGTTTATAAAATTTGGTATGACTCTTGTTAGTATACCAATTGATTTGTTAAATTTAAGAGAGATTAAGCCTGTTTTTAATGTGGTTAAAGCTGTGCGAAATAAAATTTCTGCATGCTTTAATTTTATTAAATGGCTTTTTGTCTTATTATTTGGCTGGATTAAAATATCCGCTGATAATAAAGTAATTTACACCACAGAAGTTGCATCAAAGCTTACATGTAAGCTTGTGGCTTTAGCTTTTAAAAATGCGTTTTTGACATTTAAGTGGAGTGTGGTTGCTAGAGGTGCTTGCATTATAGCGACTATATTTCTATTGTGGTTTAATTTTATATATGCCAATGTAATTTTTAGTGATTTTTATTTGCCTAAAATTGGTTTCTTGCCGACTTTTGTTGGTAAGATCGTACAGTGGATTAAGAGCACTTTTAGTCTTGTAACTATTTGTGATCTATATTCCATTCAGGATGTGGGTTTTAAGAATCAGTATTGTAATGGAAGTATCGCATGTCAATTCTGCTTGGCAGGATTTGATATGTTAGATAATTATAAAGCCATTGATGTAGTACAGTATGAAGCTGATAGGAGAGCATTTGTTGATTATACAGGTGTGTTAAAGATTGTCATTGAATTGATAGTTAGTTACGCCCTGTATACGGCATGGTTCTACCCATTGTTTGCTCTTATTAGTATTCAGATCTTGACCACTTGGCTGCCTGAGCTTTTTATGCTTAGTACATTACATTGGAGTGTTAGGTTGCTGGTGTCTTTAGCTAATATGTTACCAGCACATGTGTTTATGAGGTTTTATATTATTATTGCCTCTTTTATTAAGCTGTTTAGCTTGTTTAGGCATGTTGCCTATGGTTGTAGTAAACCTGGTTGTTTGTTTTGTTACAAGAGGAATCGTAGTCTACGTGTTAAATGTAGTACTATTGTTGGTGGCATGATACGCTATTACGATGTTATGGCTAATGGTGGCACTGGCTTTTGTTCAAAACATCAATGGAATTGCATTGATTGTGATTCTTATAAACCAGGTAATACTTTTATTACTGTTGAGGCCGCTCTTGATTTATCTAAGGAATTGAAACGGCCTATTCAGCCTACAGATGTTGCTTATCATACGGTTACGGATGTTAAGCAAGTTGGTTGTTATATGCGCTTGTTCTATGAGCGTGATGGACAGCGCACATATGATGATGTTAATGCTAGTTTGTTTGTGGATTATAGTAATTTGCTACATTCTAAGGTTAAGGGTGTGCCTAATATGCATGTTGTGGTAGTGGAAAATGATGCCGATAAAGCTAATTTTCTTAATGCTGCTGTATTTTATGCACAGTCTTTGTTTAGACCTATTTTAATGGTTGATAAAAATCTGATAACTACTGCTAATACTGGTACGTCTGTTACAGAAACTATGTTTGATGTTTATGTTGACACATTTTTGTCTATGTTTGATGTGGATAAAAAGAGTCTTAATGCTTTAATAGCAACTGCGCATTCTTCTATAAAACAGGGTACGCAGATTTGTAAAGTTTTGGATACCTTTTTAAGCTGTGCTCGTAAAAGTTGTTCTATTGATTCAGATGTTGATACTAAGTGTTTAGCTGATTCTGTCATGTCTGCTGTATCGGCAGGCCTTGAATTGACGGATGAAAGTTGTAATAACTTGGTGCCAACATATTTGAAGGGTGATAACATTGTGGCAGCTGATTTAGGTGTTCTGATTCAAAATTCTGCTAAGCATGTGCAGGGTAATGTTGCTAAACTAGCCGGTGTTTCCTGTATATGGTCTGTGGATGCTTTTAATCAGCTAAGTTCTGATTTCCAGCATAAATTGAAGAAAGCATGTTGTAAAACTGGTTTGAAATTGAAGCTTACTTATAATAAGCAGATGGCTAATGTCTCTGTTTTAACTACACCCTTTAGTCTTAAAGGGGGTGCAGTTTTTAGTTATTTTGTTTATGTATGTTTTCTGTTGAGTTTGGTTTGTTTTATTGGATTGTGGTGCTTAATGCCCACTTACACAGTACACAAATCAGATTTTCAGCTTCCCGTTTATGCCAGTTATAAAGTTTTAGATAATGGTGTTATTAGAGATGTTAGCGTTGAAGATGTTTGTTTCGCTAACAAATTTGAACAATTTGATCAATGGTATGAGTCTACATTTGGTCTAAGTTATTATAGTAACAGTATGGCTTGTCCCATTGTTGTTGCTGTAGTAGACCAGGATTTTGGCTCTACTGTGTTTAATGTCCCTACCAAAGTGTTACGATATGGTTACCATGTGTTGCACTTTATTACACATGCACTTTCTGCTGATGGAGTGCAGTGTTATACGCCACATAGTCAAATATCGTATTCTAATTTTTATGCTAGTGGCTGTGTGCTTTCCTCCGCTTGTACTATGTTTGCAATGGCCGATGGTAGTCCACAACCTTATTGTTATACAGAGGGGCTTATGCAGAACGCTTCTCTGTATAGTTCATTGGTACCTCACGTGCGGTATAATCTTGCTAATGCTAAAGGTTTTATCCGTTTTCCAGAAGTGTTGCGAGAAGGACTTGTGCGTATTGTGCGTACTCGTTCTATGTCGTATTGCAGAGTTGGATTATGTGAGGAAGCTGATGAGGGTATATGCTTTAACTTTAATGGTTCTTGGGTGCTTAATAATGATTATTATAGATCATTGCCTGGGACCTTTTGTGGTAGAGATGTTTTTGACTTAATTTATCAGCTTTTTAAAGGTTTAGCACAGCCTGTGGATTTCTTGGCATTGACTGCTAGTTCTATTGCTGGTGCTATACTTGCTGTAATTGTTGTTTTGGTGTTTTATTACTTAATAAAGCTTAAACGTGCTTTTGGTGATTACACCAGTATTGTTTTTGTTAATGTGATTGTGTGGTGTGTAAATTTTATGATGCTTTTTGTGTTTCAAGTTTACCCTACACTTTCTTGTGTATATGCTATTTGTTATTTTTATGCCACGCTTTATTTCCCTTCGGAGATAAGTGTGATAATGCATTTACAATGGCTAGTTATGTATGGCACTATTATGCCTTTATGGTTTTGTTTGCTATATATATCTGTTGTTGTTTCAAATCATGCTTTTTGGGTATTCGCTTACTGCAGACGGCTTGGTACTTCTGTTCGTAGTGATGGTACATTTGAAGAAATGGCTCTTACTACTTTTATGATTACAAAAGATTCTTATTGTAAGCTTAAGAATTCTTTGTCTGATGTTGCTTTTAATAGATATTTGAGTTTGTATAATAAATATAGGTATTACAGCGGTAAAATGGATACTGCTGCATATAGGGAGGCTGCTTGTTCTCAGTTGGCTAAAGCAATGGATACATTTACCAATAATAATGGTAGTGATGTGCTTTACCAACCACCTACTGCTTCCGTTTCAACTTCATTCTTGCAATCTGGCATTGTGAAAATGGTTAATCCTACTTCTAAGGTAGAACCATGTATTGTCAGTGTTACCTATGGTAATATGACATTGAATGGTTTATGGTTGGATGATAAGGTCTACTGTCCCAGACATGTGATATGTTCTGCTTCAGATATGACTAATCCAGATTATACAAATTTGTTGTGTAGAGTAACATCAAGTGATTTTACTGTATTGTTTGATCGTTTAAGCCTTACAGTGATGTCTTATCAAATGCAGGGTTGTATGCTTGTTCTTACAGTGACCCTGCAAAATTCTCGTACGCCAAAATATACATTTGGTGTGGTTAAGCCTGGTGAGACTTTTACTGTTTTAGCTGCTTATAACGGCAAACCACAAGGAGCCTTTCATGTGACTATGCGTAGTAGTTATACCATTAAGGGTTCCTTTTTATGCGGATCTTGTGGATCTGTTGGTTATGTGCTAATGGGTGATTGTGTTAAATTTGTGTATATGCATCAATTGGAGCTTAGTACTGGTTGTCATACTGGTACTGATTTCAATGGGGATTTTTATGGTCCTTATAAGGATGCTCAGGTTGTCCAATTGCCCGTTCAGGATTATATACAATCTGTTAATTTTGTAGCATGGCTTTATGCTGCTATACTTAATAATTGTAATTGGTTTGTACAAAGTGATAAGTGTTCTGTTGAAGATTTTAATGTGTGGGCTTTGTCTAATGGGTTTAGCCAAGTTAAGTCTGATCTTGTTATAGATGCTTTAGCTTCTATGACTGGTGTGTCTTTGGAAACACTATTGGCTGCTATTAAGCGTCTCAAGAATGGTTTTCAAGGACGTCAGATTATGGGTAGTTGCTCCTTTGAGGATGAATTGACACCTAGCGATGTTTATCAACAACTCGCTGGTATCAAGTTACAATCAAAGCGCACTAGATTGGTTAAAGGCATTGTTTGTTGGATTATGGCTTCTACATTTTTGTTTAGTTGTATAATTACAGCATTTGTGAAATGGACTATGTTTATGTATGTAACTACTAATATGCTTAGTATTACGTTTTGTGCACTTTGTGTTATAAGTTTGGCCATGTTGTTGGTTAAACATAAGCATCTTTATTTGACTATGTATATAATTCCTGTGCTTTTTACACTGCTGTATAACAACTATTTGGTTGTGTACAAGCAGACATTTAGAGGCTATGTTTATGCATGGCTATCATATTATGTTCCATCAGTTGAGTATACTTATACTGATGAAGTTATTTATGGCATGTTATTGCTTATAGGAATGGTCTTTGTTACATTACGTAGCATTAACCATGATTTGTTCTCTTTTATAATGTTTGTTGGCCGTGTGATTTCTGTTGTCTCTTTGTGGTACATGGGTTCTAACTTAGAGGAAGAAATTCTTCTTATGTTGGCTTCTCTTTTTGGTACTTACACATGGACAACAGCTTTATCTATGGCTGCAGCAAAGGTTATTGCTAAGTGGGTTGCTGTGAATGTTTTATATTTCACAGATATACCTCAAATTAAGATAGTGCTTGTATGCTATTTGTTTATAGGTTATATTATTAGCTGTTATTGGGGTTTGTTTTCCTTGATGAACAGTTTGTTTAGAATGCCTTTGGGTGTTTATAATTATAAAATTTCAGTACAGGAATTAAGATATATGAATGCTAATGGATTGCGCCCTCCTAAGAATAGTTTTGAAGCCCTTATGCTTAATTTTAAGCTTTTGGGTATTGGAGGTGTGCCAATTATTGAAGTATCTCAATTTCAATCAAAATTGACTGATGTTAAATGTGCTAATGTTGTCTTGCTTAATTGCTTGCAACATTTGCATGTTGCTTCTAACTCTAAGTTGTGGCAGTATTGTAGCACTTTGCACAATGAAATACTTGCCACTTCTGATCTGGGTGTAGCTTTTGAAAAGCTTGCTCAGTTGTTAATTGTTTTGTTTGCTAATCCAGCTGCTGTGGATAGCAAGTGCCTGACTAGTATTGAAGAAGTTTGCGACGATTACGCAAAGGACAATACTGTTTTGCAGGCTTTACAGAGTGAATTTGTTAATATGGCTAGCTTCGTTGAATATGAAGTTGCTAAGAAAAATCTTGATGAGGCGCGTTCTAGTGGTTCTGCTAATCAACAGCAGTTAAAACAGCTAGAGAAAGCCTGTAATATTGCTAAATCTGCTTATGAACGCGACCGTGCTGTAGCAAGAAAGTTGGAGCGTATGGCAGATTTGGCTCTCACTAATATGTATAAAGAAGCTAGAATTAATGATAAGAAGAGTAAGGTTGTTTCTGCCTTGCAAACTATGCTTTTTAGTATGGTGCGTAAGTTAGATAATCAAGCTCTGAATTCAATATTAGATAATGCTGTGAAGGGTTGTGTACCATTGAATGCAATCCCTTCATTGGCTGCAAATACTCTGACTATAATTGTACCAGATAAAAGTGTTTACGATCAGGTAGTTGACAATGTCTATGTTACCTATGCGGGTAATGTATGGCAGATTCAAACTATCCAAGATTCAGATGGTACAAATAAGCAGTTGAATGAGATATCTGATGATTGTAACTGGCCACTAGTTATTATTGCAAATCGGCATAATGAGGTATCTGCAACCGTTTTGCAAAATAATGAATTAATGCCTGCTAAGTTGAAAACTCAGGTCGTTAATAGTGGTCCAGATCAGACTTGTAACACACCTACTCAATGTTACTATAATAATAGTAACAATGGGAAGATTGTTTATGCTATACTTAGTGATGTTGATGGTCTTAAGTATACAAAGATTCTTAAAGATGATGGCAATTTTGTTGTTTTGGAGTTAGATCCTCCTTGTAAATTTACTGTTCAAGATGTTAAAGGTCTTAAAATTAAGTACCTTTATTTTGTAAAAGGTTGTAACACACTAGCAAGAGGCTGGGTTGTTGGTACAATTTCTTCTACAGTTAGATTGCAAGCTGGAACTGCTACTGAGTATGCTTCCAACTCATCTATATTATCTTTATGTGCGTTTTCTGTAGATCCTAAGAAAACGTATTTAGATTTTATACAGCAGGGAGGAACACCTATTGCCAATTGTGTTAAAATGTTGTGTGACCATGCTGGTACCGGTATGGCCATTACTGTTAAACCCGATGCTACCACTAATCAGGATTCATATGGTGGTGCGTCTGTTTGTATATATTGCCGCGCACGAGTTGAACACCCAGATGTTGATGGGTTGTGCAAATTACGCGGCAAGTTTGTACAAGTGCCTGTAGGTATAAAAGATCCTGTGTCTTATGTTTTGACACATGATGTTTGTCAAGTTTGTGGATTTTGGCGGGATGGAAGTTGTTCATGTGTTAGCACTGACACTACTGTTCAGTCAAAAGATACTAATTTTTTAAACCGGGGTACGAGTGTAGATGCCCGTCTCGTACCCTGTGCCAGTGGTTTATCTACTGATGTACAATTAAGGGCATTTGATATTTGCAATGCTAGTGTTGCTGGCATTGGTTTACATTTAAAAGTTAATTGCTGCCGTTTTCAGCGTGTTGATGAGAACGGTGATAAATTAGATCAGTTCTTTGTTGTTAAGAGGACAGATCTGACTATATATAATAGAGAGATGGAATGCTATGAGCGTGTAAAAGATTGTAAGTTTGTGGCTGAACACGATTTCTTTACATTTGATGTAGAAGGTAGTCGTGTGCCACATATTGTACGCAAGGATTTAACAAAGTATACTATGTTGGATCTTTGCTATGCGTTGCGACATTTTGATCGCAATGATTGCATGCTGCTTTGTGACATTCTCTCTATATATGCTGGTTGTGAACAATCCTACTTTACTAAGAAGGATTGGTATGATTTTGTTGAAAATCCTGATATTATTAATGTTTATAAAAAGCTAGGACCTATTTTTAATAGAGCCCTAGTTAGCGCTACTGAGTTTGCAGACAAATTGGTGGAGGTAGGCTTAGTAGGCATTTTAACACTTGATAACCAAGATTTAAATGGTAAATGGTATGATTTTGGTGACTATGTTATTGCAGCCCCAGGTTGTGGTGTTGCTATAGCAGACTCTTATTATTCTTATATGATGCCTATGCTGACCATGTGTCATGCATTGGATTGTGAATTGTATGTGAATAATGCTTATAGACTATTTGATCTTGTACAGTATGATTTTACTGATTACAAGCTCGAATTGTTTAATAAGTATTTTAAGCACTGGAGTATGCCATACCATCCTAACACGGTTGATTGTCAGGATGATCGGTGTATCATACATTGTGCTAATTTTAACATACTTTTTAGTATGGTTTTACCTAATACATGTTTTGGGCCTCTTGTTAGGCAAATTTTTGTGGATGGTGTTCCTTTTGTTGTTTCAATTGGATACCATTATAAAGAACTTGGTATTGTGATGAATATGGATGTGGATACACATCGTTATCGCTTGTCTTTAAAAGACTTGCTTTTATATGCTGCTGATCCAGCTTTGCATGTAGCTTCTGCTAGTGCATTGTATGATTTACGCACTTGCTGTTTTAGTGTTGCGGCTATAACAAGCGGTGTGAAATTTCAAACAGTTAAACCTGGTAATTTTAATCAGGATTTTTATGATTTTATTTTAAGTAAGGGCCTGCTTAAAGAGGGTAGTTCAGTTGATCTGAAGCACTTTTTCTTTACGCAGGATGGTAATGCTGCTATTACTGATTATAATTATTATAAGTATAATTTGCCCACCATGGTGGACATTAAGCAGTTGTTGTTTGTTTTGGAAGTTGTTTATAAGTATTTTGAGATTTATGATGGTGGGTGTATACCGGCATCACAAGTCATTGTTAATAATTATGATAAGAGTGCTGGCTATCCATTTAATAAATTTGGAAAAGCCAGGCTCTATTATGAAGCATTATCATTTGAGGAGCAGGATGAAATTTACGCCTATACTAAGCGCAATGTCCTGCCAACACTTACTCAAATGAATTTGAAATATGCTATTAGTGCTAAGAATAGAGCCCGCACTGTTGCTGGTGTTTCCATACTTAGTACTATGACTGGCAGAATGTTTCATCAAAAGTGTTTGAAAAGTATAGCAGCTACACGTGGTGTTCCTGTTGTTATAGGCACCACTAAATTTTATGGCGGCTGGGATGATATGTTACGTCGCCTTATTAAAGATGTTGATAATCCTGTACTTATGGGTTGGGATTATCCTAAGTGTGATCGTGCTATGCCAAACATACTACGTATTGTTAGTAGTCTGGTTTTGGCTCGAAAACATGAGGCATGTTGTTCGCAAAGCGATAGGTTTTATCGACTTGCGAATGAATGCGCACAAGTTTTGAGTGAAATTGTTATGTGTGGTGGCTGTTATTATGTTAAGCCTGGTGGCACTAGTAGTGGTGATGCAACTACTGCTTTTGCTAATTCAGTTTTTAACATATGTCAAGCTGTTTCAGCCAATGTATGTGCTTTAATGTCATGCAATGGTAATAAGATTGAAGATTTGAGTATACGTGCTCTTCAGAAGCGCTTATACTCACATGTGTATAGAAGTGATATGGTTGATACAACCTTTGTCACAGAATATTATGAATTTTTAAATAAGCATTTTAGTATGATGATTTTGAGTGATGATGGCGTTGTGTGTTATAATTCTGATTATGCGTCCAAAGGGTATATTGCTAATATAAGTGCCTTTCAACAGGTATTGTATTATCAAAATAACGTTTTTATGTCAGAATCCAAATGTTGGGTTGAAAATGACATAAACAATGGACCTCATGAATTCTGTTCACAACACACAATGCTTGTAAAGATGGATGGGGACGATGTCTATCTTCCATATCCTGATCCTAGTCGTATATTAGGAGCTGGATGTTTTGTAGATGATTTGTTAAAGACTGATAGTGTTCTTTTAATAGAACGATTTGTAAGTCTTGCAATAGATGCTTATCCACTTGTGTACCACGAAAATGAAGAATACCAAAAGGTTTTTCGTGTTTATTTGGAGTATATAAAGAAGTTGTACAATGACCTGGGTAATCAGATCTTGGATAGCTACAGTGTTATTTTAAGTACTTGTGATGGACAAAAGTTTACTGATGAGTCCTTTTACAAGAACATGTATTTAAGAAGTGCAGTTATGCAGAGTGTTGGAGCTTGCGTGGTCTGCTCTTCTCAAACATCATTACGTTGTGGCAGTTGCATCAGAAAGCCTCTTCTTTGCTGCAAGTGTTGTTACGATCATGTTATGGCAACTGATCATAAATATGTTTTGAGTGTTTCACCATATGTGTGTAACGCACCAGGATGTGATGTAAATGATGTTACCAAATTGTATCTAGGTGGTATGTCATATTATTGTGAAGATCATAAGCCACAATATTCGTTTAAGTTGGTAATGAATGGTATGGTTTTTGGTCTATATAAACAATCTTGTACAGGATCTCCGTACATAGATGATTTTAATCGTATAGCTAGTTGTAAATGGACTGATGTTGATGATTACATACTGGCTAATGAATGTACAGAGCGCTTGAAATTGTTTGCTGCAGAAACTCAAAAGGCGACTGAGGAAGCCTTTAAGCAGAGTTATGCATCAGCAACAATACAAGAGATTGTTAGCGAGCGCGAATTGATCCTTTCTTGGGAGATTGGAAAAGTGAAGCCACCACTTAATAAAAATTATGTTTTTACTGGCTACCATTTTACTAAAAATGGCAAGACAGTTTTAGGTGAGTATGTTTTTGATAAGAGTGAGTTGACTAATGGTGTGTATTATCGCGCCACAACCACTTATAAGCTATCTGTAGGAGATGTTTTTGTTTTAACCTCTCATTCAGTAGCTAATTTAAGTGCTCCTACGCTTGTGCCGCAGGAGAATTATAGTAGTATTAGATTTGCTAGTGTTTATAGTGTGCTTGAGACGTTTCAGAACAATGTCGTTAATTATCAACACATTGGTATGAAACGTTATTGTACCGTGCAAGGACCTCCTGGTACAGGAAAGTCACATCTTGCTATTGGTCTTGCTGTTTATTATTGTACAGCACGTGTAGTATACACTGCGGCCAGCCATGCAGCTGTTGACGCATTGTGTGAAAAAGCATACAAATTTTTGAATATAAATGACTGCACTCGTATTGTTCCTGCCAAGGTCAGGGTGGAGTGCTATGATAAGTTTAAAATTAATGACACCACTCGTAAGTATGTGTTTACTACTATAAATGCATTACCTGAGATGGTGACTGATATTGTTGTTGTAGATGAAGTTAGTATGCTTACCAATTATGAGCTTTCTGTTATTAATGCTCGTATTCGTGCTAAGCATTATGTTTACATTGGTGATCCTGCTCAATTGCCAGCACCACGTGTGTTATTGAGCAAGGGTACACTTGAACCTAAATATTTTAACACTGTTACTAAGCTTATGTGTTGCTTAGGGCCAGACATTTTTCTTGGTACATGTTATAGATGTCCTAAGGAAATTGTTGATACAGTGTCTGCCTTGGTTTATGAAAATAAGCTTAAGGCTAAGAATGAAAGTAGTTCATTGTGTTTTAAGGTCTATTATAAAGGCGTTACAACACATGAAAGTTCTAGTGCTGTAAATATGCAGCAGATTTATTTGATTAATAAGTTTTTGAAGGCTAACCCTTTGTGGCATAAAGCCGTTTTTATTAGCCCATATAATAGCCAGAACTTTGCAGCTAAGCGTGTTTTGGGTTTGCAAACCCAGACCGTGGATTCTGCTCAAGGTTCTGAATATGATTATGTTATATATTCACAGACTGCAGAAACAGCGCATTCTGTAAATGTTAATCGCTTCAATGTTGCTATTACTCGAGCCAAGAAAGGTATTCTTTGTGTTATGAGTAATATGCAGTTGTTTGAAGCATTACAGTTTACTACATTGACCTTAGATAAAGTGCCACAGGCCGTTGAAACGAGAGTTCAATGTAGTACCAATTTATTTAAAGATTGTAGCAAGAGTTATAGTGGTTACCACCCAGCTCACGCTCCTTCATTTTTGGCAGTAGATGACAAATATAAGGCAACTGGCGATTTAGCCGTGTGTCTTGGTATTGGAGATTCTGCTGTTACATATTCAAGATTAATATCACTCATGGGTTTTAAACTTGATGTCACCCTTGATGGGTATTGTAAGCTTTTTATAACTAAAGAAGAAGCTGTTAAACGCGTGCGTGCTTGGGTTGGCTTTGATGCTGAAGGCGCTCATGCCACGCGTGATAGCATTGGGACAAATTTCCCACTTCAATTAGGGTTTTCTACAGGAATTGATTTTGTTGTGGAAGCCACTGGTTTGTTTGCTGATAGAGATGGTTACAGCTTTAAAAAGGCTGTGGCTAAAGCTCCTCCTGGTGAACAATTTAAGCATCTCATCCCTTTGATGACGAGAGGTCAGCGCTGGGATGTTGTTAGACCTAGAATAGTACAAATGTTTGCAGATCATTTAATTGATCTGTCTGATTGTGTTGTGCTAGTTACATGGGCAGCCAACTTTGAGCTCACTTGTCTCCGATACTTTGCAAAAGTAGGTCGTGAGATTTCTTGTAATGTGTGCACTAAACGTGCCACAGCTTACAATTCTAGAACTGGTTACTATGGTTGTTGGCGCCATAGTGTTACATGTGATTACTTGTATAATCCACTTATTGTTGATATTCAACAGTGGGGATATATTGGATCTTTATCAAGTAATCATGATTTATATTGTAGTGTCCACAAAGGAGCACATGTTGCTTCATCTGATGCTATAATGACACGGTGTTTGGCCGTTTATGATTGTTTTTGCAATAATATTAATTGGAATGTGGAGTATCCCATTATTTCAAATGAGTTAAGTATTAATACCTCTTGTAGGGTCTTGCAGCGTGTTATGCTTAAAGCTGCAATGCTCTGCAACAGATATACTTTGTGTTATGATATTGGCAACCCAAAAGCGATTGCCTGTGTCAAAGATTTTGATTTTAAGTTCTATGATGCCCAACCAATTGTTAAGTCTGTCAAGACTCTTTTGTATTCTTTTGAGGCACATAAGGACTCTTTTAAAGATGGTTTGTGTATGTTTTGGAACTGTAATGTGGATAAGTATCCACCGAATGCAGTTGTATGTAGATTTGACACGAGAGTGTTGAATAATTTAAATCTTCCTGGCTGTAATGGAGGTAGTTTGTATGTTAATAAACATGCATTCCACACTAAACCCTTTTCTAGGGCAGCCTTTGAGCATTTGAAGCCTATGCCATTTTTCTATTATTCAGATACGCCTTGCGTGTATATGGATGGCATGGATGCTAAGCAGGTTGATTATGTACCTTTGAAATCCGCCACTTGCATCACAAGATGCAATTTAGGTGGTGCAGTTTGTTTAAAACATGCTGAAGAGTATCGTGAGTACCTAGAGTCTTACAATACAGCTACTACAGCAGGTTTTACTTTTTGGGTCTATAAGACATTTGATTTTTATAATTTGTGGAATACGTTCACCAAGCTACAAAGCTTGGAGAACGTTGTATATAATTTAGTCAAAACTGGTCATTATACAGGACAGGCTGGTGAAATGCCTTGTGCCATTATAAATGATAAAGTTGTGGCTAAGATCGATAAGGAGGATGTTGTCATTTTTATTAATAATACAACATACCCTACTAATGTGGCTGTTGAATTATTTGCCAAGCGCAGTATTCGACACCATCCAGAGCTTAAGCTCTTTAGAAATTTGAATATAGACGTGTGTTGGAAGCACGTCATTTGGGATTATGCTAGAGAAAGTATATTTTGCAGTAATACCTATGGTGTCTGCATGTATACAGATTTAAAGTTCATTGATAAATTGAATGTCCTTTTTGATGGTCGTGATAATGGTGCTCTTGAAGCTTTTAAACGCTCTAATAATGGCGTTTACATTTCCACGACAAAAGTTAAGAGTCTTTCGATGATAAAAGGTCCACCGCGTGCTGAATTAAATGGCGTAGTGGTGGACAAGGTTGGAGACACTGATTGTGTGTTTTATTTTGCTGTGCGTAAAGAGGGTCAGGATGTCATCTTCAGCCAATTCGACAGCCTGAGAGTCAGCTCTAACCAGAGCCCACAAGGTAATCTGGGGAGTAATGAACCCGGTAATGTCGGTGGTAATGATGCTCTGGCAACCTCCACTATCTTTACACAAAGCCGTGTTATTAGCTCTTTTACATGTCGTACTGATATGGAAAAAGATTTTATAGCTTTAGATCAAGACTTGTTTATTCAGAAGTATGGTTTGGAGGACTATGCCTTTGAACACATTGTTTATGGTAATTTCAACCAGAAGATTATTGGTGGTTTGCATTTGTTAATAGGCTTGTACCGAAGACAGCAAACTTCCAATCTGGTTATTCAGGAGTTTGTTTCATACGACTCCAGCATACACTCTTATTTTATCACTGATGAGAAGAGTGGTGGTAGTAAGAGTGTTTGCACTGTTATAGATATTTTGTTGGATGATTTTGTGGCTCTTGTTAAGTCACTTAATCTCAACTGTGTGAGTAAGGTTGTTAACGTTAATGTTGATTTTAAAGATTTTCAGTTCATGCTTTGGTGTAACGATGAGAAAGTTATGACTTTCTATCCTCGTTTGCAAGCTGCATCTGACTGGAAGCCTGGTTATTCTATGCCTGTATTATACAAGTATTTGAATTCCCCAATGGAAAGAGTTAGTCTCTGGAATTATGGGAAGCCGGTTACTTTGCCTACAGGCTGTATGATGAATGTTGCTAAGTATACTCAGTTATGTCAATATCTGAATACTACAACATTAGCTGTACCTGTTAATATGCGAGTTTTGCATTTAGGTGCAGGTTCAGAAAAAGGAGTAGCACCAGGTTCTGCAGTTCTTAGGCAGTGGTTGCCTGCTGGTACTATTCTTGTAGATAATGATTTATACCCATTTGTGAGTGACAGTGTCGCTACATATTTTGGTGATTGTATAACCTTACCCTTTGATTGTCAATGGGATTTGATAATTTCTGATATGTATGACCCTATTACTAAGAACATAGGGGAGTACAATGTAAGTAAAGATGGTTTCTTTACATACATTTGTCATATGATTCGCGACAAGTTAGCTCTGGGTGGCAGTGTTGCTATAAAAATAACAGAGTTTTCTTGGAATGCAGAATTATATAAGTTAATGGGGTATTTTGCATTTTGGACGGTTTTCTGCACAAATGCAAACGCTTCTTCTAGTGAAGGGTTTTTAATTGGCATAAATTATTTGGGTAAGCCCAAGGTTGAGATAGATGGAAATGTTATGCATGCCAATTATTTGTTTTGGAGAAATTCCACAGTTTGGAACGGGGGTGCTTATAGCCTGTTTGACATGGCTAAATTCCCGCTTAAGTTGGCTGGTACTGCCGTAATAAATTTAAGAGCAGACCAGATTAATGATATGGTTTATTCCCTTCTTGAAAAGGGTAAACTACTTGTTAGAGATACAAATAAAGAAGTTTTTGTTGGTGACAGTTTGGTTAATGTAATCATGGCAGTCGCTTATGCAGACAAGCCTAATCACTTTATCAATTTTCCACTTACCCAGTTTCAGGGTTTTGTGTTAAATTATAAAGGTTTACAATTTCAACTTCTCGATGAAGGAGTGGATTGTAAAATACAAACAGCGCCTCACATTAGTCTTGCTATGCTGGATATTCAGCCTGAAGACTACAGAAGTGTTGATGTTGCTATTCAAGAAGTTATTGATGATATGCATTGGGGTGAGGGCTTTCAGATTAAATTTGAAAACCCCCATATCCTAGGAAGATGCATAGTTTTAGATGTTAAAGGTGTAGAAGAATTGCATGATGATTTAGTTAATTACATTCGTGATAAAGGTTGTGTTGCTGACCAATCCAGGAAGTGGATTGGACATTGCACCATAGCCCAACTCACTGATGCTGCACTTTCCATTAAGGAAAATGTTGATTTTATAAACAGCATGCAATTCAACTATAAAATCACTATCAATCCCTCATCACCGGCTAGAATTGAAATAGTTAAGCTTGGTGCTGAAAAGAAAGATGGTTTTTATGAAACCATAGCTAGCCACTGGATGGGAATTCGTTTTGAATATAATCCACCCACTGATAAGCTAGCTATGATTATGGGTTATTGTTGTTTAGAAGTGGTGCGTAAAGAGCTAGAAGAAGGTGACCTTCCCGAGAATGATGATGATGCTTGGTTTAAGCTATCGTACCATTATGAAAACAATTCTTGGTTCTTTCGACATGTCTACAGGAAAAGTTCTTATTTCCGTAAGTCTTGTCAAAATTTAGATTGTAATTGTTTGGGGTTTTATGAATCTTCAGTTGAAGAAGACATGTTTTTGATACTTTTAATTTCCTTACCAACGGCTTTTGCTGTTATAGGAGATTTAAAGTGTACTACACTTTCCATTAATGATGTTGACACTGGTGTTCCTTCTATTAGCACTGATACTGTCGATGTTACTAATGGTTTAGGTACTTATTATGTTTTAGATCGTGTGTATTTAAATACTACGTTGTTGCTTAATGGTTATTACCCTACTTCAGGTTCTACATATCGTAATATGGCACTGAAGGGAACTTTACTATTGAGCACACTGTGGTTTAAACCACCTTTTCTTTCTGATTTTACTAATGGTATTTTTGCTAAGGTCAAAAATACCAAGGTTATTAAAGATGGTGTAATGTATAGTGAGTTTCCTGCTATAACTATAGGTAGTACTTTTGTAAATACATCCTATAGTGTGGTAGTACAACCACATACTACCATTTTGGGTAATAAATTACAAGGTTTCTTAGAGATCTCTGTTTGCCAGTATACTATGTGCGAGTACCCAAATACGATTTGTAATCCTAATCTGGGTAATCAACGCGTAGAACTATGGCATTGGGATACAGGTGTTGTTTCCTGTTTATATAAGCGTAATTTCACATATGATGTGAATGCTGATTATTTGTATTTTCATTTTTATCAAGAAGGTGGTACTTTTTATGCATATTTTACAGACACTGGTGTTGTTACTAAGTTTCTGTTTAATGTTTATTTAGGCACGGTGCTCTCACATTATTATGTCATGCCTTTGACTTGTAATAGTGCTCTGACTTTAGAATATTGGGTTACACCCCTCACTTCTAAACAATATCTACTAGCTTTCAATCAAGATGGTGTTATTTTTAATGCTGTTGATTGTAAGAGTGATTTTATGAGTGAGATTAAGTGTAAAACACTATCTATAGCACCATCTACTGGTGTTTATGAATTAAACGGTTACACTGTTCAGCCAATTGCAGATGTTTACCGACGTATACCTAATCTTCCCGATTGCAATATTGAGGCTTGGCTTAATGATAAGTCGGTGCCCTCTCCATTAAATTGGGAACGTAAGACTTTTTCAAATTGTAATTTTAATATGAGCAGCCTGATGTCTTTTATTCAGGCAGACTCATTTACTTGTAATAATATTGATGCTGCTAAGATATATGGTATGTGTTTTTCCAGCATAACTATAGATAAGTTTGCAATACCCAATGGTAGGAAGGTTGACCTACAATTGGGTAATTTGGGTTATTTGCAGTCTTTTAACTATAGAATTGATACTACTGCTACAAGTTGTCAGTTGTATTATAATTTACCTGCTGCTAATGTTTCTGTTAGCAGGTTTAATCCTTCTACTTGGAATAGGAGATTTGGTTTTACAGAACAATCTGTTTTTAAGCCTCAACCTGCAGGTGTTTTTACTGATCATGATGTTGTTTATGCACAACATTGTTTTAAAGCTCCCACAAATTTCTGTCCGTGTAAATTGGATGGGTCTTTGTGTGTAGGTAGTGGTTCTGGTATAGATGCTGGTTATAAAAATACTGGTATAGGCACTTGTCCTGCAGGTACTAATTATTTAACTTGCCATAATGCTGCCCAATGTGATTGTTTGTGCACTCCAGACCCCATTACATCTAAAGCTACAGGGCCTTACAAGTGCCCCCAAACTAAATACTTAGTTGGCATAGGTGAGCACTGTTCGGGTCTTGCTATTAAAAGTGATTATTGTGGAGGTAACCCTTGTAGTTGCCAACCACAAGCATTTTTGGGTTGGTCTGTTGACTCTTGTTTACAAGGGGATAGGTGTAATATTTTTGCTAATTTTATTTTGCATGATGTTAATAGTGGTACTACTTGTTCTACTGATTTACAAAAATCAAACACAGACATAATTCTTGGTGTTTGTGTTAATTATGATCTTTATGGTATTACTGGCCAAGGGATTTTTGTTGAGGTTAATGCGACTTATTATAATAGTTGGCAGAACCTTTTATATGATTCTAATGGTAATCTCTATGGTTTTAGAGACTACTTAACAAATAGAACTTTTATGATTCGTAGTTGCTATAGTGGTCGTGTTTCAGCGGCCTTTCATGCTAACTCTTCCGAACCAGCATTGCTATTTCGGAATATCAAATGCAATTACGTTTTTAATAACACTCTTTCACGACAGCTGCAACCTATTAACTATTTTGATAGCTATCTTGGTTGTGTTGTCAATGCTGATAATAGTACTTCTAGTGTTGTTCAAACATGTGATCTAACAGTAGGTAGTGGTTACTGTGTGGATTACTCTACAAAAAGACGAAGTCGTAGATCGATTACCACTGGTTATCGGTTTACTAATTTTGAGCCATTTACTGTTAATTCAGTAAATGATAGTTTAGAACCTGTAGGTGGTTTGTATGAAATTCAAATACCTTCAGAGTTTACTATAGGTAATATGGAGGAGTTTATTCAAACAAGCTCTCCTAAAGTTACTATTGATTGTTCTGCTTTTGTCTGTGGTGATTATGCAGCATGTAAATCACAGTTGGTTGAATATGGTAGCTTCTGTGACAATATTAATGCTATACTCACAGAAGTAAATGAATTACTTGACACTACACAGTTGCAAGTAGCTAATAGTTTAATGAATGGTGTCACTCTTAGCACTAAGCTTAAAGATGGCGTTAATTTCAATGTAGACGACATCAATTTTTCCCCTGTATTAGGTTGTTTAGGAAGCGATTGCAATAAAGTTTCCAGTAGATCTGCTATAGAGGACTTACTTTTTTCTAAAGTAAAGTTATCTGATGTCGGTTTCGTTGAGGCTTATAATAATTGTACTGGAGGTGCCGAAATTAGGGACCTCATTTGTGTGCAAAGTTATAATGGTATCAAGGTGTTGCCTCCACTGCTCTCAGAAAATCAGATCAGTGGATACACTTTGGCTGCCACCTCTGCTAGCCTGTTTCCTCCATGGTCAGCAGCAGCAGGTGTACCATTCTATTTAAATGTTCAGTATCGTATTAATGGTATTGGTGTTACCATGGATGTGCTAAGTCAAAATCAAAAGCTTATTGCTAATGCATTTAACAATGCTCTTGGTGCTATCCAGGAAGGGTTTGATGCTACCAATTCTGCTTTAGTTAAAATTCAAGCTGTTGTTAATGCAAATGCTGAAGCTCTTAATAACTTATTGCAACAACTCTCTAATAGATTTGGTGCTATAAGTTCTTCTTTACAAGAAATTCTATCTAGACTGGATGCTCTTGAAGCGCAAGCTCAGATAGACAGACTTATTAATGGGCGTCTTACCGCTCTTAATGCTTATGTTTCTCAACAGCTTAGTGACTCTACACTAGTAAAGTTTAGTGCAGCACAAGCTATGGAGAAGGTTAATGAATGTGTCAAAAGCCAATCATCCAGGATAAATTTTTGTGGTAATGGTAATCATATTATATCATTAGTGCAGAATGCTCCATATGGTTTGTATTTTATCCACTTTAGCTATGTCCCTACTAAGTATGTCACTGCGAAGGTTAGTCCCGGCCTGTGCATTGCTGGTGATAGAGGTATAGCCCCTAAGAGTGGTTATTTCGTTAATGTAAATAATACTTGGATGTTCACTGGTAGTGGTTATTACTACCCTGAACCTATAACTGGAAATAATGTTGTTGTTATGAGTACCTGTGCTGTTAATTATACTAAAGCGCCGGATGTAATGCTGAACATTTCAACACCCAACCTCCCTGATTTTAAGGAAGAGTTGGATCAATGGTTTAAAAACCAAACATCAGTGGCACCAGATTTGTCACTTGATTATATAAATGTTACATTCTTGGACCTACAAGATGAAATGAATAGGTTACAGGAGGCAATAAAAGTTTTAAATCAGAGCTACATCAATCTCAAGGACATTGGTACATATGAGTATTATGTAAAATGGCCTTGGTATGTATGGCTTTTAATTGGCTTTGCTGGTGTAGCTATGCTTGTTTTACTATTCTTCATATGCTGTTGTACAGGATGTGGGACTAGTTGTTTTAAGAAATGTGGCGGTTGTTGTGATGATTATACTGGACACCAGGAGTTAGTAATTAAAACATCACATGAAGACATGTTTTTGCTTCCTAGATTTGTTCTAGTTAGCTGCATAATTGGTAGCCTAGGTTTTGACAACCCTCCTACCAATGTTGTTTCGCATTTAAATGGAGATTGGTTTTTATTTGGTGACAGTCGTTCAGATTGTAATCATGTTGTTACTACCAACCCCCGTAATTATTCTTATATGGACCTTAATCCTGCCTTGTGTGGTTCTGGTAAAATATCAGCTAAAGCTGGCAACTCCATTTTTAGGAGTTTTCACTTTACTGATTTTTATAATTACACAGGCGAAGGTCAACAAATTATTTTCTATGAGGGTGTTAATTTTACGCCTTATCATGCCTTTAAATGCACCACTTCTGGTAGTAATGATATTTGGATGCAGAATAAAGGCTTGTTTTACACTCAGGTTTATAAGAATATGGCTGTGTATCGCAGCCTTACTTTTGTTAATGTACCATATGTTTATAATGGCTCTGCACAATCTACAGCCCTTTGTAAATCTGGTAGTTTAGTTCTTAATAACCCTGCATATATAGCTCGTGAAGCTAATTTTGGGGATTATTATTATAAGGTTGAAGCTGATTTTTATTTGTCAGGTTGTGACGAGTATATCGTACCACTTTGTATTTTCAACGGCAAGTTTTTGTCGAATACAAAGTATTATGATGATAGTCAATATTATTTTAATAAAGACACTGGTGTTATTTATGGTCTCAATTCTACTGAAACCATTACCACTGGTTTTGACTTTAATTGTCATTATTTAGTTCTACCCTCTGGTAATTATTTAGCCATTTCAAACGAGCTATTGTTAACTGTTCCTACTAAAGCAATCTGTCTTAATAAGCGTAAGGATTTTACGCCTGTACAGGTTGTTGATTCGCGGTGGAACAATGCCAGGCAGTCCGATAACATGACGGCAGTTGCTTGTCAACCCCCGTACTGTTATTTTCGTAATTCTACTACCAATTATGTTGGTGTTTATGATATCAATCATGGGGATGCTGGTTTTACTAGCATACTCAGTGGTTTGTTATATGACTCACCTTGTTTTTCGCAGCAAGGTGTTTTTAGGTATGATAATGTTAGCAGTGTCTGGCCTCTCTACCCCTATGGCAGATGCCCTACTGCTGCTGATATTAATACCCCTGATGTACCTATTTGTGTGTATGATCCGCTACCAATTATTTTGCTTGGCATTCTTTTGGGTGTTGCGGTCATAATTATTGTAGTTTTGTTGTTATATTTTATGGTGGATAATGGTACTAGGCTGCATGATGCTATGTTTATGGCTGATGCTTATTTTGCAGACACTGTGTGGTATGTGGGGCAAATAATTTTTATAGTTGCCATTTGTTTATTGGTTATAATAGTTGTAGTGGCATTTTTGGCAACTTTTAAATTGTGTATTCAACTTTGCGGTATGTGTAATACCTTAGTACTGTCCCCTTCTATTTATGTGTTTAATAGAGGTAGGCAGTTTTATGAGTTTTACAATGATGTAAAACCACCAGTTCTTGATGTGGATGACGTTATGAGTAGTGTAACTACACCAGCACCAGTTTACACCTGGACTGCTGATGAAGCTATTAAATTCCTAAAGGAATGGAACTTTTCTTTGGGTATTATACTACTTTTTATTACAGTCATATTGCAATTTGGATATACAAGTCGCAGTATGTTTGTTTATGTTATTAAGATGATTATTTTGTGGCTTATGTGGCCCCTTACTATCATCTTAACTATTTTCAATTGCGTGTATGCGTTGAATAATGTGTATCTTGGCTTCTCTATAGTTTTTACTATAGTGGCCATTATCATGTGGATTGTGTATTTTGTGAATAGTATCAGGTTGTTTATTAGAACTGGAAGTTGGTGGAGTTTCAACCCAGAAACAAACAACTTGATGTGTATAGATATGAAGGGAAGGATGTATGTTAGGCCGATAATTGAGGACTATCATACCCTTACGGTCACAATAATACGTGGTCATCTTTACATGCAAGGTATAAAACTAGGTACTGGCTATTCTTTGTCAGATTTGCCAGCTTATGTGACTGTTGCTAAGGTCTCGCACCTGCTCACGTATAAGCGTGGTTTTCTTGACAAGATAGGCGATACTAGTGGTTTTGCTGTTTATGTTAAGTCCAAAGTCGGTAATTACCGACTGCCATCAACCCAAAAGGGTTCTGGCTTGGACACCGCATTGTTGAGAAATAATATCATGTCTTTTACTCCTGGTAAGCAATCCAGTAGTAGAGCGTCCTCTGGAAATCGTTCTGGTAATGGCATCCTTAAGTGGGCCGATCAGTCCGACCAATCTAGAAATGTTCAAACCAGGGGTAGAAGAGCTCAACCCAAGCAAACTGCTACTTCTCAGCAACCATCAGGAGGGAATGTTGTACCCTACTATTCTTGGTTCTCTGGAATTACTCAGTTTCAAAAGGGAAAGGAGTTTGAATTTGCAGAGGGACAAGGTGTGCCTATTGCACCAGGAGTCCCAGCTACTGAAGCTAAAGGGTACTGGTACAGACACAACAGACGTTCCTTTAAAACAGCCGATGGCAACCAGCGTCAATTGCTGCCACGATGGTATTTTTACTATCTTGGAACAGGACCGCATGCCAAAGACCAGTATGGCACCGACATTGACGGAGTCTTCTGGGTCGCTAGTAACCAGGCTGATGTCAATACCCCGGCTGACATTCTCGATCGGGACCCAAGTAGCGATGAGGCTATTCCGACTAGGTTTCCGCCTGGCACGGTACTCCCTCAGGGTTACTATATTGAAGGCTCAGGAAGGTCTGCTCCTAATTCCAGATCTACTTCACGCGCATCCAGTAGAGCCTCTAGTGCAGGATCGCGCAGTAGAGCCAATTCTGGCAATAGAACCCCTACCTCTGGTGTAACACCTGATATGGCTGATCAAATTGCTAGTCTTGTTCTGGCAAAACTTGGCAAGGATGCCACTAAGCCACAGCAAGTAACTAAGCAGACTGCCAAGGAAATCAGACAGAAAATTTTGAATAAGCCCCGCCAGAAGAGGAGCCCCAATAAACAATGCACTGTTCAGCAGTGTTTTGGGAAGAGAGGCCCCAATCAGAATTTTGGTGGTGGAGAAATGTTAAAACTTGGAACTAGTGATCCACAGTTCCCCATTCTTGCAGAACTCGCACCCACAGCTGGTGCGTTTTTCTTTGGATCAAGATTAGAGTTGGCCAAAGTGCAGAATTTGTCTGGGAATCTTGACGAGCCCCAGAAGGATGTTTATGAATTGCGCTATAATGGCGCAATTAGATTTGATAGTACACTTTCAGGTTTTGAGACCATAATGAAGGTGTTGAATGAGAATTTGAATGCATACCAACAACAGGATGGTACGATGAATATGAGTCCAAAACCACAGCGTCAGCGTGGTCAGAAGAACGGACAAGGAGAAAATGATAATATAAGTGTTGCAGCGCCCAAAAGCCGTGTGCAGCAAAATAAGATTAGAGAGTTGACTGCAGAGGACATCAGCCTTCTTAAGAAGATGGATGAGCCCTTTACTGAAGATACCTCAGAAATA
>gi|331264481|gb|DQ811784.2|_Bovine_coronavirus_DB2_complete_genome
ATGTCGAAGATCAACAAATACGGTCTCGAACTACACTGGGCTCCAGAATTTCCATGGATGTTTGAGGACACAGAGGAGAAGTTGGACAACCCTAGTAGTTCAGAGGTGGATATAGTATGCTCCACCACTGCGCAAAAGCTGGAAACAGGCGGAATTTGTCCTGAAAATCATGTGATGGTGGATTGTCGCCGACTTCTTAAACAAGAGTGTTGTGTGCAGTCTAGCCTAATACGTGAAATTGTTATGAATACACGTCCATATGATTTGGAGGTGCTACTTCAAGATGCTTTGCAGTCCCGCGAAGCAGTTTTGGTTACACCCCCTCTAGGTATGTCTTTGGAGGCATGCTATGTGAGAGGTTGTAATCCTAATGGATGGACCATGGGTTTGTTTCGGCGTAGAAGTGTGTGTAACACTGGTCGCTGCGCTGTTAACAAGCATGTGGCCTATCAGCTATATATGATTGATCCTGCGGGTGTCTGTTTTGGTGCAGGTCAATTTGTGGGTTGGGTTATACCCTTAGCCTTTATGCCTGTGCAATCCCGGAAATTTATTGTTCCTTGGGTTATGTACTTGCGTAAGTGTGGCGAAAAGGGTGCCTACAACAAAGATCATAAACGTGGCGGTTTTGAACACGTTTATAATTTTAAAGTTGAGGATGCTTACGACCTGGTTCATGATGAGCCTAAGGGTAAGTTTTCTAAGAAGGCTTATGCTTTAATTAGAGGATACCGTGGTGTTAAACCGCTTCTTTATGTAGACCAGTATGGTTGTGATTATACTGGTGGTCTTGCAGATGGCTTAGAGGCTTATGCTGATAAGACATTGCAAGAAATGAAGGCATTATTTCCTATTTGGAGCCAGGAACTCCCTTTTGATGTAACTGTGGCATGGCACGTTGTGCGTGATCCACGTTATGTTATGAGACTGCAGAGTGCTTCTACTATACGTAGTGTTGCATATGTTGCTAACCCTACTGAAGACTTGTGTGATGGTTCTGTTGTTATAAAGGAACCTGTGCATGTTTATGCGGATGACTCTATTATTTTACGTCAACATAATTTAGTTGACATTATGAGTTGTTTTTATATGGAGGCAGATGCAGTTGTAAATGCTTTTTATGGTGTTGATTTGAAAGATTGTGGTTTTGTTATGCAGTTTGGTTATATTGACTGCGAACAAGACTTGTGTGATTTTAAAGGTTGGGTTCCTGGTAATATGATAGATGGTTTTGCTTGCACTACTTGTGGTCATGTTTATGAGACAGTTGATTTGCTAGCACAATCTTCAGGTGTTCTGCCTGTTAATCCTGTATTGCATACTAAGAGTGCAGCAGGTTATGGTGGTTTTGGTTGTAAGGATTCTTTTACCCTGTATGGCCAAACTGTAGTTTATTTTGGAGGTTGTGTGTATTGGAGTCCAGCACGTAATATATGGATTCCTATATTAAAATCTTCTGTTAAGTCTTATGACGGTTTGGTTTATACTGGAGTTGTAGGTTGCAAGGCTATTGTAAAGGAAACAAATCTCATTTGCAAAGCGTTGTACCTTGATTATGTTCAACACAAGTGTGGCAATTTACACCAGCGGGAGTTGCTAGGTGTGTCAGATGTGTGGCATAAACAATTGCTATTAAATAGAGGTGTGTACAAACCTCTTTTAGAGAATATTGATTATTTTAATATGCGGCGCGCTAAATTTAGTTTAGAAACTTTTACTGTTTGTGCAGATGGTTTTATGCCTTTTCTTTTAGATGATTTGGTTCCGCGCGCATATTATTTGGCAGTAAGTGGTCAAGCATTTTGTGACTACGCAGGTAAAATCTGCCATGCTGTTGTGTCTAAGAGTAAAGAGTTACTTGATGTGTCTCTGGATTCTTTAAGTGCAGCTATACATTATTTGAATTCTAAAATTGTTGATTTGGCTCAACATTTTAGTGATTTTGGAACAAGTTTTGTTTCTAAAATTGTTCATTTCTTTAAGACTTTTACTACTAGCACTGCTCTTGCATTTGCATGGGTTTTATTTCATGTTTTGCATGGTGCTTATATAGTAGTAGAGAGTGATATATATTTTGTTAAAAACATTCCTCGTTATGCTAGTGCTGTTGCACAAGCATTTCGGAGTGTTGCTAAAGTTGTACTGGACTCCTTAAGAGTTACTTTTATTGATGGCCTTTCTTGTTTTAAGATTGGACGTAGAAGAATTTGTCTCTCAGGCAGTAAAATTTATGAAGTTGAGCGTGGCTTGTTACATTCATCTCAATTGCCATTAGATGTTTATGATTTAACCATGCCTAGTCAAGTTCAGAAAGCCAAGCAAAAACCTATTTATTTAAAAGGTTCTGGTTCTGATTTTTCATTAGCAGATAGTGTGGTTGAAGTTGTTACAACTTCACTTACACCATGTGGTTATTCTGAACCACCTAAAGTTGCAGATAAAATTTGCATTGTGGATAATGTTTATATGGCCAAGGCTGGTGACAAATATTACCCTGTTGTGGTTGATGGTCATGTAGGACTCTTGGATCAAGCATGGAGGGTTCCTTGTGCTGGAAGGCGTGTTACATTTAAGGAACAGCCTACAGTAAATGAGATTGCAAGCACACCTAAGACTATTAAAGTTTTTTATGAGCTTGACAAAGATTTTAATACTATTTTAAACACTGCATGTGGAGTGTTTGAAGTAGATGATACCGTGGATATGGAGGAATTTTATGCTGTGGTGGTTGATGCCATAGAAGAGAAACTTTCTCCATGTAAGGAGCTTGAAGGTGTAGGTGCTAAAGTTAGTGCCTTTTTACAGAAATTAGAGGATAATTCCCTATTTTTATTTGATGAGGCTGGCGAGGAAGTTCTTGCTCCTAAATTGTATTGTGCTTTTACAGCTCCTGAAGATGATGACTTTCTTGAAGAAAGTGGTGTTGAAGAAGATGATGTAGAAGGTGAGGAAACTGATTTAACTGTCACAAGTGCTGGAGAGCCTTGTGTTGCCAGTGAACAGGAGGAGTCTTCTGAAATCTTAGAGGACACTTTGGATGATGGTCCATGTGTGGAGACATCTGATTCACAAGTTGAAGAAGATGTAGAAATGTCGGATTTTGTTGATCTTGAATCTGTGATTCAGGATTATGAAAATGTTTGTTTTGAGTTTTATACTACAGAGCCAGAATTTGTTAAAGTTTTGGATCTGTATGTGCCTAAAGCAACTCGCAACAATTGCTGGTTGCGATCAGTCTTGGCAGTGATGCAGAAACTGCCCTGTCAATTTAAAGATAAAAATTTGCAGGATCTTTGGGTGTTATATAAGCAACAGTATAGTCAGTTGTTTGTTGATACCTTGGTTAATAAGATACCTGCTAATATTGTAGTTCCACAAGGTGGTTATGTTGCCGATTTTGCATATTGGTTCTTAACCTTATGTGATTGGCAGTGTGTTGCATACTGGAAATGCATTAAATGTGATTTAGCTCTTAAGCTTAAAGGCTTGGATGCTATGTTCTTTTATGGTGATGTTGTCTCACATGTGTGCAAGTGTGGTGAGTCTATGGTACTTATTGATGTTGATGTGCCATTTACAGCCCACTTTGCTCTTAAAGATAAGTTGTTTTGTGCATTTATTACTAAGCGTAGTGTGTATAAAGCAGCTTGTGTTGTGGATGTTAATGATAGTCATTCTATGGCTGTTGTTGATGGTAAACAAATTGATGATCATCGTATCACTAGTATTACTAGTGATAAGTTTGATTTTATTATTGGGCATGGTATGTCATTTTCAATGACTACTTTTGAAATTGCCCAATTGTATGGTTCTTGTATAACACCTAATGTATGTTTTGTTAAAGGTGATATAATTAAAGTTTCTAAGCGTGTTAAAGCAGAAGTCGTTGTAAATCCTGCTAACGGCCATATGGCACATGGTGGTGGTGTTGCAAAGGCTATTGCAGTAGCAGCTGGACAGCAGTTTGTTAAAGAGACTACCGATATGGTTAAGTCTAAAGGAGTTTGTGCTACTGGAGACTGTTATGTCTCTACAGGGGGCAAATTATGTAAAACTGTGCTTAATGTTGTTGGACCTGATGCGAGAACACAGGGTAAACAAAGTTATGCATTGTTAGAGCGTGTTTATAAACATCTTAACAAATATGATTGTGTTGTTACAACTTTGATCTCAGCTGGTATATTTAGTGTGCCTTCTGATGTGTCTTTAACATATCTACTTGGTACTGCCAAGAAACAAGTTGTTCTTGTTAGCAATAATCAAGAGGATTTTGATCTTATTTCTAAGTGTCAGATAACTGCCGTTGAGGGCACTAAGAAATTGGCAGAGCGTCTTTCTTTTAATGTAGGGCGTTCTATCGTTTACGAAACAGATGCTAATAAGTTGATTTTAAGCAATGACGTTGCATTTGTTTCGACATTTAATGTTTTACAGGATGTTTTATCCTTAAGACATGATATAGCACTTGATGATGATGCACGAACCTTTGTTCAGAGCAATGTTGATGTTGTACCTGAGGGTTGGCGTGTTGTCAATAAGTTTTATCAAATTAATGGTGTTAGAACCGTTAAGTATTTTGAGTGTCCCGGTGGCATAGATATATGCAGCCAGGATAAAGTTTTTGGTTATGTACAGCAGGGTAGTTTTAATAAGGCTACTGTTGCTCAAATTAAAGCCTTGTTTTTGGATAAAGTGGACATCTTGCTAACTGTTGATGGTGTCAATTTCACTAACAGGTTTGTGCCTGTGGGTGAAAATTTTGGTAAGAGTCTAGGAAATGTGTTCTGTGATGGAGTTAATGTCACGAAACATAAGTGTGATATAAATTATAAAGGTAAAGTCTTTTTCCAGTTTGATAATCTTTCTAGTGAAGATTTAAAGGCTGTAAGAAGTTCTTTTAATTTTGACCAGAAGGAATTGCTTGCCTACTACAACATGCTTGTTAATTGTTCTAAGTGGCAGGTTGTTTTTAATGGTAAGTATTTCACTTTTAAGCAAGCTAATAACAATTGTTTTGTTAATGTTTCTTGCTTAATGCTCCAGAGTTTGAATCTGAAATTTAAAATTGTTCAATGGCAGGAGGCGTGGCTTGAATTTCGTTCTGGCCGCCCTGCTAGATTTGTATCTTTGGTTTTGGCCAAAGGTGGGTTTAAATTTGGGGATCCTGCTGATTCTAGAGATTTCTTGCGTGTTGTGTTTAGTCAAGTTGATTTGACAGGGGCAATATGTGATTTTGAAATTGCATGTAAATGTGGTGTAAAGCAGGAACAGCGTACTGGTGTGGACGCTGTTATGCATTTTGGTACATTGAGTCGTGAAGATCTTGAGATTGGTTACACCGTGGATTGTTCTTGCGGTAAAAAGCTAATTCATTGTGTACGATTTGATGTACCATTTTTAATTTGTAGTAATACACCTGCTAGTGTAAAATTACCTAAGGGTGTAGGAAGTGCAAATATTTTTAAAGGTGATAAGGTTGGTCATTATGTTCATGTTAAGTGTGAACAGTCTTATCAGCTTTATGATGCTTCTAATGTTAAGAAGGTTACAGACGTTACTGGCAATTTGTCAGATTGTTTGTATCTTAAAAATTTGAAACAAACTTTTAAATCGGTGTTAACCACCTATTATTTGGATGATGTTAAGAAACTTGAGTATAAACCTGACTTGTCACAATATTATTGTGACGGAGGTAAGTATTATACTCAGCGTATTATTAAAGCCCAATTTAAAACATTTGAGAAAGTAGATGGTGTGTATACTAATTTTAAATTGATAGGACACACCATCTGTGATATTCTTAATGCTAAGTTGGGTTTTGATAGCTCTAAAGAGTTTGTTGAATATAAAGTTACTGAGTGGCCAACAGCTACAGGTGATGTGGTGTTGGCTACTGATGATTTGTATGTTAAGAGATATGAGAGGGGTTGTATTACTTTTGGTAAACCTGTTATATGGTTAAGCCATGAGCAAGCTTCCCTCAATTCTTTAACATATTTTAATAGACCTTTATTGGTTGATGAGAATAAATTTGATGTTTTAAAAGTGGATGATGTTGACGATGGTGGTGATATCTCAGAGAGTGATGCCAAAGAATCCAAAGAAATCAACATTATTAAGTTAAGTGGTGTTAAAAAACCATTTAAGGTTGAAGATAGTGTCATTGTTAATGATGATACTAGTGAAATCAAATATGTTAAGAGTTTGTCTATAGTTGATGTGTATGATATGTGGCTTACAGGTTGTAGGTATGTTGTTAGGACTGCTAATGCTTTGAGCATGGCAGTTAACGTACCTACAATACGTAAGTTTATAAAATTTGGTATGACTCTTGTTAGTATACCAATTGATTTGTTAAATTTAAGAGAGATTAAGCCTGTTTTTAATGTGGTTAAAGCTGTGCGAAATAAAATTTCTGCATGCTTTAATTTTATTAAATGGCTTTTTGTCTTATTATTTGGCTGGATTAAAATATCCGCTGATAATAAAGTAATTTACACCACAGAAGTTGCATCAAAGCTTACATGTAAGCTTGTAGCTTTAGCTTTTAAAAATGCATTTTTGACATTTAAGTGGAGTGTGGTTGCTAGAGGTGCTTGCATTATAGCGACTATATTTCTATTGTGGTTTAATTTTATATATGCCAATGTAATTTTTAGTGATTTTTATTTGCCTAAAATCGGTTTCTTGCCGACTTTTGTTGGTAAGATCGCACAGTGGATTAAGAACACTTTTAGTCTTGTAACTATTTGTGATCTATATTCCATTCATGATGTGGGTTTTAAGAATCAGTATTGTAATGGAAGTATCGCATGTCAGTTCTGCTTGGCAGGATTTGATATGTTAGATAATTATAAAGCCATTGATGTAGTACAGTATGAAGCTGATAGGAGAGCATTTGTTGATTATACAGGTGTGTTAAAGATTGTCATTGAATTGATAGTTAGTTACGCCCTGTATACGGCATGGTTCTACCCATTGTTTGCTCTTATTAGTATTCAGATCTTGACCACTTGGCTGCCTGAGCTTTTTATGCTTAGTACATTACATTGGAGTGTTAGGTTGCTGGTGTCTTTAGCTAATATGTTACCAGCACATGTGTTTATGAGGTTTTATATTATTATTGCCTCTTTTATTAAGCTGTTTAGCTTGTTTAGGCATGTTGCCTATGGTTGTAGTAAACCTGGTTGTTTGTTTTGTTACAAGAGGAATCGTAGTCTACGTGTTAAATGTAGTACTATTGTTGGTGGCATGATACGCTATTACGATGTTATGGCTAATGGTGGCACTGGCTTTTGTTCAAAACATCAATGGAATTGCATTGATTGTGATTCTTATAAACCAGGTAATACTTTTATTACTGTTGAGGCCGCTCTTGATTTATCTAAGGAATTGAAACGGCCTATTCAGCCTACAGATGTTGCTTATCATACGGTTACGGATGTTAAGCAAGTTGGTTGTTATATGCGCTTGTTCTATGAGCGTGATGGACAGCGCACATATGATGATGTTAATGCTAGTTTGTTTGTGGATTATAGTAATTTGCTACATTCTAAGGTTAAGGGTGTGCCTAATATGCATGTTGTGGTAGTGGAAAATGATGCCGATAAAGCTAATTTTCTTAATGCTGTTGTATTTTATGCACAGTCTTTGTTTAGACCTATTTTAATGGTTGATAAAAATCTGATAACTACTGCTAATACTGGTACGTCTGTTACAGAAACTATGTTTGATGTTTATGTGGACACATTTTTGTCTATGTTTGATGTGGATAAAAAGAGTCTTAATGCTTTAATAGCAACTGCGCATTCTTCTATAAAACAGGGTACGCAGATTTGTAAAGTTTTGGATACCTTTTTAAGCTGTGCTCGTAAAAGTTGTTCTATTGATTCAGATGTTGATACTAAGTGTTTAGCTGATTCTGTCATGTCTGCTGTATCGGCAGGCCTTGAATTGACGGATGAAAGTTGCAATAACTTGGTGCCAACATATTTGAAGGGTGATAACATTGTGGCAGCTGATTTAGGTGTTCTGATTCAAAATTCTGCTAAGCATGTGCAGGGTAATGTTGCTAAAATAGCCGGTGTTTCCTGTATATGGTCTGTGGATGCTTTTAATCAGCTTAGTTCTGATTTCCAGCATAAATTGAAGAAAGCATGTTGTAAAACTGGTTTGAAACTGAAGCTTACTTATAATAAGCAGATGGCTAATGTCTCTGTTTTAACTACACCCTTTAGTCTTAAAGGGGGTGCAGTTTTTAGTTATTTTGTTTATGTATGTTTTGTGTTGAGTTTGGTTTGTTTTATTGGATTGTGGTGCTTAATGCCCACTTACACAGTACACAAATCAGATTTTCAGCTTCCCGTTTATGCCAGTTATAAAGTTTTAGATAATGGTGTTATTAGGGATGTTAGCGTTGAAGATGTTTGTTTCGCTAACAAATTTGAACAATTTGATCAATGGTATGAGTCTACATTTGGTCTAAGTTATTATAGTAACAGTATGGCTTGTCCCATTGTTGTTGCTGTAGTAGACCAGGATCTTGGCTCTACTGTGTTTAATGTCCCTACCAAAGTGTTACGATATGGTTACCATGTGTTGCACTTTATTACACATGCACTTTCTGCTGATGGAGTGCAGTGTTATACGCCACATAGTCAAATATCGTATTCTAATTTTTATGCTAGTGGCTGTGTGCTTTCCTCCGCTTGTACTATGTTTGCAATGGCCGATGGTAGTCCACAACCTTATTGTTATACAGAGGGGCTTATGCAGAACGCTTCTCTGTATAGTTCATTGGTACCTCATGTGCGGTATAATCTTGCTAATGCTAAAGGTTTTATCCGTTTTCCAGAAGTGTTGCGAGAAGGACTTGTGCGTATTGTGCGTACTCGTTCTATGTCGTATTGCAGAGTTGGATTATGTGAGGAAGCTGATGAGGGTATATGCTTTAACTTTAATGGTTCTTGGGTGCTTAATAATGATTATTATAGATCATTGCCTGGGACCTTTTGTGGTAGAGATGTTTTTGACTTAATTTATCAGCTTTTTAAAGGTTTAGCACAGCCTGTGGATTTCTTGGCATTGACTGCTAGTTCTATTGCTGGTGCTATACTTGCTGTAATTGTTGTTTTGGTGTTTTATTACTTAATAAAGCTTAAACGTGCTTTTGGTGATTACACCAGTATTGTTTTTGTTAATGTGATTGTGTGGTGTGTAAATTTTATGATGCTTTTTGTGTTTCAAGTTTACCCTACACTTTCTTGTGTATATGCTATTTGTTATTTTTATGCCACGCTTTATTTCCCTTCGGAGATAAGTGTGATAATGCATTTACAATGGCTAGTTATGTATGGCACTATTATGCCTTTATGGTTTTGTTTGCTATATATATCTGTTGTTGTTTCAAATCATGCTTTTTGGGTATTTGCTTACTGCAGACGGCTTGGTACTTCTGTTCGTAGTGATGGTACATTTGAAGAAATGGCTCTTACTACTTTTATGATTACAAAAGATTCTTATTGTAAGCTTAAGAATTCTTTGTCTGATGTTGCTTTTAATAGATATTTGAGTTTGTATAATAAATATAGGTATTACAGCGGTAAAATGGATACTGCTGCATATAGGGAGGCTGCTTGTTCTCAGTTGGCTAAAGCAATGGATACATTTACCAATAATAATGGTAGTGATGTGCTTTACCAACCACCTACTGCTTCCGTTTCAACTTCATTCTTGCAATCTGGTATTGTGAAAATGGTTAATCCTACTTCTAAGGTAGAACCATGTATTGTCAGTGTTACCTATGGTAATATGACATTGAATGGTTTATGGTTGGATGATAAGGTCTACTGTCCCAGACATGTGATATGTTCTGCTTCAGATATGACTAATCCAGATTATACAAATTTGTTGTGTAGAGTAACATCAAGTGATTTTACTGTATTGTTTGATCGTTTAAGCCTTACAGTGATGTCTTATCAAATGCAGGGTTGTATGCTTGTTCTTACAGTGACCCTGCAAAATTCTCGTACGCCAAAATATACATTTGGTGTGGTTAAACCTGGTGAGACTTTTACTGTTTTAGCTGCTTATAACGGCAAACCACAAGGAGCCTTTCATGTGACTATGCGTAGTAGTTATACCATTAAGGGTTCCTTTTTATGCGGATCTTGTGGATCTGTTGGTTATGTGCTAATGGGTGATTGTGTTAAATTTGTGTATATGCATCAATTGGAGCTTAGTACTGGTTGTCATACTGGTACTGATTTCAATGGGGATTTTTATGGTCCTTATAAGGATGCTCAGGTTGTCCAATTGCCCGTTCAGGATTATATACAATCTGTTAATTTTGTAGCATGGCTTTATGCTGCTATACTTAATAATTGTAATTGGTTTGTACAAAGTGATAAGTGTTCTGTTGAAGATTTTAATGTGTGGGCTTTGTCTAATGGGTTTAGCCAAGTTAAGTCTGATCTTGTTATAGATGCTTTAGCTTCTATGACTGGTGTGTCTTTGGAAACACTATTGGCTGCTATTAAGCGTCTCAAGAATGGTTTTCAAGGACGTCAGATTATGGGTAGTTGCTCCTTTGAGGATGAATTGACACCTAGCGATGTTTATCAACAACTCGCTGGTATCAAGTTACAATCAAAGCGTACTAGATTGGTTAAAGGCATTGTTTGTTGGATTATGGCTTCTACATTTTTGTTTAGTTGTATAATTACAGCATTTGTGAAATGGACTATGTTTATGTATGTAACTACTAATATGCTTAGTATTACGTTTTGTGCACTTTGTGTTATAAGTTTGGCCATGTTGTTGGTTAAACATAAGCATCTTTATTTGACTATGTATATAATTCCTGTGCTTTTTACACTGCTGTATAACAACTATTTGGTTGTGTACAAGCAGACATTTAGAGGCTATGTTTATGCATGGCTATCATATTATGTTCCATCAGTTGAGTATACTTATACTGATGAAGTTATTTATGGCATGTTATTGCTTATAGGAATGGTCTTTGTTACATTACGTAGCATTAACCATGATTTGTTTTCTTTTATAATGTTTGTTGGTCGTGTGATTTCTGTTGTCTCTTTGTGGTACATGGGTTCTAACTTAGAGGAAGAAATTCTTCTTATGTTGGCTTCTCTTTTTGGTACTTACACATGGACAACAGCTTTATCTATGGCTGCAGCAAAGGTTATTGCTAAGTGGGTTGCTGTGAATGTTTTGTATTTCACAGATATACCTCAAATTAAGATAGTGCTTGTATGCTATTTGTTTATAGGTTATATTATTAGCTGTTATTGGGGTTTGTTTTCCTTGATGAACAGTTTGTTTAGAATGCCTTTGGGTGTTTATAATTATAAAATTTCAGTACAGGAATTAAGATATATGAATGCTAATGGATTGCGCCCTCCTAAGAATAGTTTTGAAGCCCTTATGCTTAATTTTAAGCTTTTGGGTATTGGAGGTGTGCCAATTATTGAAGTATCTCAATTTCAATCAAAATTGACTGATGTTAAATGTGCTAACGTTGTCTTGCTTAATTGCTTGCAACATTTGCATGTTGCTTCTAACTCTAAGTTGTGGCAGTATTGTAGCACTTTGCACAATGAAATACTTGCCACTTCTGATCTGGGTGTTGCTTTTGAAAAGCTTGCTCAGTTGTTAATTGTTTTGTTTGCTAATCCAGCTGCTGTGGATAGCAAGTGCCTGACTAGTATTGAAGAAGTTTGCGACGATTACGCAAAGGACAATACTGTTTTGCAGGCTTTACAGAGTGAATTTGTTAATATGGCTAGCTTCGTTGAATATGAAGTTGCTAAGAAAAATCTTGATGAGGCGCGTTCTAGTGGTTCTGCTAATCAACAGCAGTTAAAACAGCTAGAGAAAGCCTGTAATATTGCTAAATCTGCTTATGAACGCGACCGTGCTGTAGCAAGAAAGTTGGAGCGTATGGCAGATTTGGCTCTCACTAATATGTATAAAGAAGCTAGAATTAATGATAAGAAGAGTAAGGTTGTTTCTGCCTTGCAAACTATGCTTTTTAGTATGGTGCGTAAGTTAGATAATCAAGCTCTGAATTCAATATTAGATAATGCTGTGAAGGGTTGTGTACCATTGAATGCAATCCCTTCATTGGCTGCAAATACTCTGACTATAATTGTACCAGATAAAAGTGTTTACGATCAGGTAGTTGACAATGTCTATGTTACCTATGCGGGTAATGTATGGCAGATTCAAACTATCCAAGATTCAGATGGTACAAATAAGCAGTTGAATGAGATATCTGATGATTGTAACTGGCCACTAGTTATTATTGCAAATCGGCATAATGAGGTATCTGCTACCGTTTTGCAAAATAATGAATTAATGCCTGCTAAGTTGAAAACTCAGGTTGTTAATAGTGGTCCAGATCAGACTTGTAACACACCTACTCAATGTTACTATAACAATAGTAACAATGGGAAGATTGTTTATGCTATACTTAGTGATGTTGATGGTCTTAAGTATACAAAAATTCTTAAAGATGATGGCAATTTTGTTGTTTTGGAGTTAGATCCTCCTTGTAAATTTACTGTTCAAGATGTTAAAGGTCTTAAAATTAAGTACCTTTATTTTGTAAAAGGTTGTAACACACTAGCAAGAGGATGGGTTGTTGGTACAATTTCTTCTACAGTTAGATTGCAAGCTGGAACTGCTACTGAGTATGCTTCCAACTCATCTATATTATCTTTATGTGCGTTTTCTGTAGATCCTAAGAAAACGTATTTAGATTTTATACAACAGGGAGGAACACCTATTGCCAATTGTGTTAAAATGTTGTGTGACCATGCTGGTACCGGTATGGCCATTACTGTTAAACCCGATGCTACCACTAGTCAGGATTCATATGGTGGTGCGTCTGTTTGTATATATTGCCGCGCACGAGTTGAACACCCAGATGTTGATGGGTTGTGCAAATTACGCGGCAAGTTTGTACAAGTGCCTGTAGGTATAAAAGATCCTGTGTCTTATGTTTTGACACATGATGTTTGTCAAGTTTGTGGATTTTGGCGGGATGGAAGTTGTTCATGTGTTAGCACTGACACTACTGTTCAGTCAAAAGATACTAATTTTTTAAACCGGGGTACGAGTGTAGATGCCCGTCTCGTACCCTGTGCCAGTGGTTTATCTACTGATGTACAATTAAGGGCATTTGACATTTGCAATGCTAGTGTTGCTGGCATTGGTTTACATTTAAAAGTTAATTGCTGCCGTTTTCAGCGTGTTGATGAGAACGGTGATAAATTAGATCAGTTCTTTGTTGTTAAGAGGACAGATCTGACTATATATAATAGAGAGATGGAATGCTATGAGCGTGTAAAAGATTGTAAGTTTGTGGCTGAACACGATTTCTTTACATTTGATGTAGAAGGTAGTCGTGTGCCACACATTGTACGCAAGGATTTAACAAAGTATACTATGTTGGATCTTTGCTATGCGTTGCGACATTTTGATCGCAATGATTGCATGCTGCTTTGTGACATTCTCTCTATATATGCTGGTTGTGAACAATCCTACTTTACTAAGAAGGATTGGTATGATTTTGTTGAAAATCCTGATATTATTAATGTTTATAAAAAGCTAGGACCTATTTTTAATAGAGCCCTAGTTAGCGCTACTGAGTTTGCAGACAAATTGGTGGAGGTAGGCTTAGTAGGCATTTTAACACTTGATAACCAAGATTTAAATGGTAAATGGTATGATTTTGGTGACTATGTTATTGCAGCCCCAGGGTGTGGTGTTGCTATAGCAGACTCTTATTATTCTTATATGATGCCTATGCTGACCATGTGTCATGCATTGGATTGTGAATTGTATGTGAATAATGCTTATAGACTATTTGATCTTGTACAGTATGATTTTACTGATTACAAGCTCGAATTGTTTAATAAGTATTTTAAGCACTGGAGTATGCCATACCATCCTAACACGGTTGATTGTCAGGATGATCGGTGTATCATACATTGTGCTAATTTTAACATACTTTTTAGTATGGTTTTACCTAATACATGTTTTGGGCCTCTTGTTAGGCAAATTTTTGTGGATGGTGTTCCTTTTGTTGTTTCAATTGGATACCATTATAAAGAACTTGGTATTGTGATGAATATGGATGTGGATACACATCGTTATCGCTTGTCTTTAAAAGACTTGCTTTTATATGCTGCTGATCCAGCTTTGCATGTAGCTTCTGCTAGTGCATTGTATGATTTACGCACTTGCTGTTTTAGTGTTGCGGCTATAACAAGCGGTGTAAAATTTCAAACAGTTAAACCTGGTAATTTTAATCAGGATTTTTATGATTTTATTTTAAGTAAGGGCCTGCTTAAAGAGGGTAGTTCAGTTGACCTGAAGCACTTTTTCTTTACGCAGGATGGTAATGCTGCTATTACTGATTATAATTATTATAAGTACAATTTGCCCACCATGGTGGACATTAAGCAGTTGTTGTTTGTTTTGGAAGTTGTTTATAAGTATTTTGAGATTTATGATGGTGGGTGTATACCGGCATCACAAGTCATTGTTAATAATTATGATAAGAGTGCTGGCTATCCATTTAATAAATTTGGAAAAGCCAGGCTCTATTATGAAGCATTATCATTTGAGGAGCAGGATGAAATTTACGCCTATACTAAGCGCAATGTCCTGCCAACACTTACTCAAATGAATTTGAAATATGCTATTAGTGCTAAGAATAGAGCCCGCACTGTTGCTGGTGTTTCCATACTTAGTACTATGACTGGCAGAATGTTTCATCAAAAATGTTTGAAAAGTATAGCAGCTACACGTGGTGTTCCTGTTGTTATAGGCACCACTAAGTTTTATGGCGGCTGGGATGATATGTTACGTCGCCTTATTAAAGATGTTGATAATCCTGTACTTATGGGTTGGGATTATCCTAAGTGTGATCGTGCTATGCCAAACATACTACGTATTGTTAGTAGTCTGGTTTTGGCTCGAAAACATGAGGCTTGTTGTTCGCAAAGCGATAGGTTTTATCGACTTGCGAATGAATGCGCACAAGTTCTGAGTGAAATTGTTATGTGTGGTGGCTGTTATTATGTTAAGCCTGGTGGCACTAGTAGTGGTGATGCAACTACTGCTTTTGCTAATTCAGTTTTTAACATATGTCAAGCTGTTTCAGCCAATGTATGTGCTTTAATGTCATGCAATGGTAATAAGATTGAAGATTTGAGTATACGTGCTCTTCAGAAGCGCTTATACTCACATGTGTATAGAAGTGATATGGTTGATTCAACCTTTGTCACAGAATATTATGAATTTTTAAATAAGCATTTTAGTATGATGATTTTGAGTGATGATGGCGTTGTGTGTTACAATTCTGATTATGCGTCCAAAGGGTATATTGCTAATATAAGTGCCTTTCAACAGGTATTGTATTATCAAAATAACGTTTTTATGTCAGAATCCAAATGTTGGGTTGAAAATGACATAAACAATGGACCTCATGAATTCTGTTCACAACACACAATGCTTGTAAAGATGGATGGGGACGATGTCTATCTTCCATATCCTGATCCTAGTCGTATATTAGGAGCAGGATGTTTTGTAGATGATTTGTTAAAGACTGATAGTGTTCTTTTAATAGAACGATTTGTAAGTCTTGCAATAGATGCTTATCCACTTGTGTATCACGAAAATGAAGAATACCAAAAGGTTTTTCGTGTTTATTTGGAGTATATAAAGAAGTTGTACAATGACCTGGGTAATCAGATCTTGGATAGCTACAGTGTTATTTTAAGTACTTGTGATGGACAAAAGTTTACTGATGAGTCCTTTTACAAGAACATGTATTTAAGAAGTGCAGTTATGCAGAGTGTTGGAGCTTGCGTGGTCTGCTCTTCTCAAACATCATTACGTTGTGGCAGTTGCATCAGAAAGCCTCTTCTTTGCTGCAAGTGTTGTTACGATCACGTTATGGCAACTGATCATAAATATGTTTTGAGTGTTTCACCGTATGTGTGTAACGCACCAGGATGTGATGTAAATGATGTTACCAAATTGTATCTAGGTGGTATGTCATATTATTGTGAAGATCATAAGCCACAATATTCGTTTAAGTTGGTAATGAATGGTATGGTTTTTGGTTTATATAAACAATCTTGTACAGGATCTCCGTACATAGATGATTTTAATCGTATAGCTAGTTGTAAATGGACTGATGTTGATGATTACATACTGGCTAATGAATGTACAGAGCGCTTGAAATTGTTTGCTGCAGAAACGCAAAAGGCGACTGAGGAAGCCTTTAAGCAGAGTTATGCATCAGCAACAATACAAGAGATTGTTAGCGAGCGCGAATTGATCCTCTCTTGGGAGATTGGAAAAGTGAAGCCACCACTTAATAAAAATTATGTTTTTACTGGCTACCATTTTACTAAAAATGGCAAGACAGTTTTAGGTGAGTATGTTTTTGATAAGAGTGAGTTGACTAATGGTGTGTATTATCGCGCCACAACCACTTATAAGCTATCTGTAGGAGATGTTTTTGTTTTAACCTCTCATTCAGTAGCTAATTTAAGTGCTCCTACGCTTGTGCCGCAGGAGAATTATAGTAGTATTAGATTTGCTAGTGTTTATAGTGTGCTTGAGACGTTTCAGAACAATGTCGTTAATTATCAACACATTGGTATGAAACGTTATTGCACCGTGCAAGGACCTCCTGGTACAGGAAAGTCACATCTTGCTATTGGTCTTGCTGTATATTATTGTACAGCACGTGTAGTATACACTGCGGCTAGCCATGCAGCTGTTGACGCATTGTGTGAAAAAGCATACAAATTTTTGAATATAAATGATTGCACTCGTATTGTTCCTGCTAAGGTCAGGGTGGAGTGCTATGATAAGTTTAAAATTAATGACACCACTCGTAAGTATGTGTTTACTACTATAAATGCATTACCTGAGATGGTGACTGATATTGTTGTTGTAGATGAAGTTAGTATGCTTACCAATTATGAGCTTTCTGTTATTAATGCTCGTATTCGTGCTAAGCATTATGTTTACATTGGTGATCCTGCTCAATTGCCAGCACCACGTGTGTTATTGAGCAAGGGTACACTTGAACCTAAATATTTTAACACTGTTACTAAGCTTATGTGTTGCTTAGGGCCAGACATTTTTCTTGGTACATGTTATAGATGTCCTAAGGAAATCGTTGATACAGTGTCTGCCTTGGTTTATGAAAATAAGCTTAAGGCTAAGAATGAAAGTAGTTCATTGTGTTTTAAGGTCTATTATAAAGGCGTTACAACACATGAAAGTTCTAGTGCTGTAAATATGCAGCAGATTTATTTGATTAATAAGTTTTTGAAGGCTAACCCTTTGTGGCATAAAGCCGTTTTTATTAGCCCATATAATAGCCAGAACTTTGCAGCTAAGCGTGTTTTGGGTTTGCAAACCCAGACCGTGGATTCTGCTCAAGGTTCTGAATATGATTATGTTATATATTCACAGACTGCAGAAACAGCGCATTCTGTAAATGTTAATCGCTTCAATGTTGCTATTACTCGAGCCAAGAAAGGTATTCTTTGTGTTATGAGTAATATGCAGTTGTTTGAAGCATTACAGTTTACTACATTGACCTTAGATAAAGTGCCACAGGCCGTTGAAACGAGAGTTCAATGTAGTACCAATTTATTTAAAGATTGTAGCAAGAGTTATAGTGGTTACCACCCAGCTCATGCTCCTTCATTTTTGGCAGTAGATGACAAATATAAGGCAACTGGCGATTTAGCCGTGTGTCTTGGTATTGGAGATTCTGCTGTTACATATTCAAGATTAATATCACTCATGGGTTTTAAACTTGATGTCACCCTTGATGGGTATTGTAAGCTTTTTATAACTAAAGAAGAAGCTGTTAAACGCGTGCGTGCTTGGGTTGGCTTTGATGCTGAAGGTGCTCATGCCACGCGTGATAGCATTGGGACAAATTTCCCACTTCAATTAGGGTTTTCTACAGGAATTGATTTTGTTGTGGAAGCCACTGGTTTGTTTGCTGATAGAGATGGTTACAGCTTTAAAAAGGCTGTGGCTAAAGCTCCTCCTGGTGAACAATTTAAGCATCTCATCCCTTTGATGACGAGAGGTCAGCGCTGGGATGTTGTTAGACCTAGAATAGTACAAATGTTTGCAGATCATTTAATTGATCTGTCTGATTGTGTTGTGCTAGTTACATGGGCAGCCAACTTTGAGCTCACTTGTCTCCGATACTTTGCAAAAGTAGGTCGTGAGATCTCTTGTAATGTGTGCACTAAACGTGCCACAGCTTACAATTCTAGAACTGGTTACTATGGTTGTTGGCGCCATAGTGTTACATGTGATTACTTGTATAATCCACTTATTGTTGATATTCAACAGTGGGGATATATTGGTTCTTTATCAAGTAATCATGATTTATATTGTAGTGTCCACAAAGGAGCACATGTTGCTTCATCTGATGCTATAATGACACGGTGTTTGGCCGTTTATGATTGTTTTTGCAATAATATTAATTGGAATGTGGAGTATCCCATCATTTCAAATGAGTTAAGTATTAATACCTCTTGTAGGGTCTTGCAGCGTGTTATGCTTAAAGCTGCAATGCTCTGCAACAGATATACTTTGTGTTATGATATTGGCAACCCAAAAGCGATTGCCTGTGTCAAAGATTTTGATTTTAAGTTCTATGATGCCCAACCAATTGTTAAGTCTGTCAAGACTCTTTTGTATTCTTTTGAGGCACATAAGGACTCTTTTAAAGATGGTTTGTGTATGTTTTGGAACTGTAATGTGGATAAGTATCCACCGAATGCAGTTGTATGTAGATTTGACACGAGAGTGTTGAATAATTTAAATCTTCCTGGCTGTAATGGAGGTAGTTTGTATGTTAATAAACATGCATTCCACACTAAACCCTTTTCTAGGGCAGCCTTTGAGCATTTGAAGCCTATGCCATTTTTCTATTATTCAGATACGCCTTGCGTGTATATGGATGGCATGGATGCTAAGCAGGTTGATTATGTACCTTTGAAATCCGCCACTTGCATCACAAGATGCAATTTAGGTGGTGCAGTTTGTTTAAAACATGCTGAAGAGTATCGTGAGTACCTAGAGTCTTACAATACAGCTACTACAGCAGGTTTTACTTTTTGGGTCTATAAGACATTTGATTTTTATAATTTGTGGAATACGTTCACCAAGCTACAAAGCTTGGAGAATGTTGTATATAATTTAGTCAAGACTGGTCATTATACAGGACAGGCTGGTGAAATGCCTTGTGCCATTATAAATGATAAAGTTGTGGCTAAGATCGATAAGGAGGATGTTGTCATTTTTATTAATAATACAACATATCCTACTAATGTGGCTGTTGAATTGTTTGCCAAGCGCAGTATTCGACACCATCCAGAGCTTAAGCTCTTTAGAAATTTGAATATAGACGTGTGCTGGAAGCACGTCATTTGGGATTATGCTAGAGAAAGTATATTTTGCAGTAATACCTATGGTGTCTGCATGTATACAGATTTAAAGTTCATTGATAAATTGAATGTCCTTTTTGATGGTCGTGATAATGGTGCTCTTGAAGCTTTTAAACGCTCTAATAATGGCGTTTACATTTCCACGACAAAAGTTAAGAGTCTTTCGATGATAAAAGGTCCACCGCGTGCTGAATTAAATGGCGTAGTGGTGGACAAGGTTGGAGACACTGATTGTGTGTTTTATTTTGCTGTGCGTAAAGAGGGTCAGGATGTCATCTTCAGCCAATTCGACAGCCTGAGAGTCAGCTCTAACCAGAGCCCACAAGGTAATCTGGGGAGTAATGAACCCGGTAATGTCGGTGGTAATGATGCTCTGGCAACCTCCACTATCTTTACACAAAGCCGTGTTATTAGCTCTTTTACATGTCGTACTGATATGGAAAAAGATTTTATAGCTTTAGATCAAGACGTGTTTATTCAGAAGTATGGTTTGGAGGACTATGCCTTTGAACACATTGTTTATGGTAATTTCAACCAGAAGATTATTGGTGGTTTGCATTTGTTAATAGGCTTGTACCGAAGACAGCAAACTTCCAATCTGGTTATTCAGGAGTTTGTTTCATACGACTCCAGCATACACTCTTATTTTATCACTGATGAGAAGAGTGGTGGTAGTAAGAGTGTTTGCACTGTTATAGATATTTTGTTGGATGATTTTGTGGCTCTTGTCAAGTCACTTAATCTTAACTGTGTGAGTAAGGTTGTTAACGTTAATGTTGATTTTAAAGATTTTCAGTTCATGCTTTGGTGTAACGATGAGAAAGTTATGACTTTCTATCCTCGTTTGCAAGCTGCATCTGACTGGAAGCCTGGTTATTCTATGCCTGTATTATACAAGTATTTGAATTCCCCAATGGAAAGAGTTAGTCTCTGGAATTATGGGAAGCCAGTTACTTTGCCTACAGGCTGTATGATGAATGTTGCTAAGTATACTCAGTTATGTCAATATCTGAATACTACAACATTAGCTGTACCTGTTAATATGCGAGTTTTGCATTTAGGTGCAGGTTCAGAAAAAGGAGTAGCACCGGGTTCTGCAGTTCTTAGGCAGTGGTTGCCTGCTGGTACTATTCTTGTAGATAATGATTTATACCCATTTGTGAGTGACAGTGTCGCTACATATTTTGGGGATTGTATAACCTTACCCTTTGATTGTCAATGGGATTTGATAATTTCTGATATGTATGACCCTATTACTAAGAACATAGGGGAGTACAATGTAAGTAAAGATGGTTTCTTTACATACATTTGTCATATGATTCGCGACAAGTTAGCTCTGGGTGGCAGTGTTGCTATAAAAATAACAGAGTTTTCTTGGAATGCAGAATTATATAAGTTAATGGGGTATTTTGCATTTTGGACGGTTTTCTGCACAAATGCAAACGCTTCTTCTAGTGAAGGGTTTTTAATTGGCATAAATTATTTGGGTAAGCCCAAGGTTGAGATAGATGGAAATGTTATGCATGCCAATTATTTGTTTTGGAGAAATTCCACAGTTTGGAACGGGGGTGCTTATAGCCTGTTTGATATGGCTAAATTCCCGCTTAAGTTGGCTGGTACTGCCGTAATAAATTTAAGAGCAGACCAGATTAATGATATGGTTTATTCCCTTCTTGAAAAGGGTAAACTACTTGTTAGAGATACAAATAAAGAAGTTTTTGTTGGTGACAGTTTGGTTAATGTAATCATGGCAGTCGCTTATGCAGACAAGCCTAATCACTTTATCAATTTTCCACTTACCCAGTTTCAGGGTTTTGTGTTAAATTATAAAGGTTTACAATTTCAACTTCTCGATGAAGGAGTGGATTGTAAAATACAAACAGCGCCTCACATTAGTCTTGCTATGCTGGATATTCAGCCTGAAGACTACAGAAGTGTTGATGTTGCTATTCAAGAAGTTATTGATGACATGCATTGGGGTGAGGGCTTTCAGATTAAATTTGAAAACCCCCATATCCTAGGAAGATGCATAGTTTTAGATGTTAAAGGTGTAGAAGAATTGCATGATGATTTAGTTAATTACATTCGTGATAAAGGTTGTGTTGCTGACCAATCCAGGAAATGGATTGGACATTGCACCATAGCCCAACTCACGGATGCTGCACTTTCCATTAAGGAAAATGTTGATTTTATAAACAGCATGCAATTCAATTATAAAATCACTATCAATCCCTCATCACCGGCTAGACTTGAAATAGTTAAGCTTGGTGCTGTAAAGAAAGATGGTTTTTATGAAACCATAGCTAGCCACTGGATGGGAATTCGTTTTGAATATAATCCACCCACTGATAAGCTAGCTATGATTATGGGTTATTGTTGTTTAGAAGTGGTGCGTAAAGAGCTAGAAGAAGGTGACCTTCCCGAGAATGATGATGATGCTTGGTTTAAGCTATCGTACCATTATGAAAACAATTCTTGGTTCTTTCGACATGTCTACAGGAAAAGTTCTTATTTCCGTAAGTCTTGTCAAAATTTAGATTGTAATTGTTTGGGGTTTTATGAATCTTCAGTTGAAGAAGACATGTTTTTGATACTTTTAATTTCCTTACCAACGGCTTTTGCTGTTATAGGAGATTTAAAGTGTACTACAGTTTCCATTAATGATGTTGACACTGGTGTTCCTTCTATTAGCACTGATACTGTCGATGTTACTAATGGTTTAGGTACTTATTATGTTTTAGATCGTGTGTATTTAAATACTACGTTGTTGCTTAATGGTTACTACCCTACTTCAGGTTCTACATATCGTAATATGGCACTGAAGGGAACTTTACTATTGAGCACACTATGGTTTAAACCACCTTTTCTTTCTGATTTTACTAATGGTATTTTTGCTAAGGTCAAAAATACCAAGGTTATTAAAAATGGTGTAATGTATAGTGAGTTTCCTGCTATAACTATAGGTAGTACTTTTGTAAATACATCCTATAGTGTGGTAGTACAACCACATACTACCAATTTGGATAATAAATTACAAGGTCTCTTAGAGATCTCTGTTTGCCAGTATACTATGTGCGAGTACCCAAATACGATTTGTCATCCTACTCTGGGTAATCAACGCGTAGAACTATGGCATTGGGATACAGGTGTTGTTTCCTGTTTATATAAGCGTAATTTCACATATGATGTGAATGCTGATTACTTGTATTTCCATTTTTATCAAGAAGGTGGTACTTTTTATGCATATTTTACAGACACTGGTGTTGTTACTAAGTTTCTGTTTAATGTTTATTTAGGCACGGTGCTTTCACATTATTATGTCATGCCTTTGACTTGTGATAGTGCTATGACTTTAGAATATTGGGTTACACCCCTCACTTCTAAACAATATCTACTAGCTTTCAATCAAGATGGTGTTATTTTTAATGCTGTTGATTGTAAGAGTGATTTTATGAGTGAGATTAAGTGTAAAACACTATCTATAGCACCATCTACTGGTGTTTATGAATTAAACGGTTACACTGTTCAGCCAATTGCAGATGTTTACCGACGTATACCTAATCTTCCCGATTGTAATATTGAGGCTTGGCTTAATGATAAGTCGGTGCCCTCTCCATTAAATTGGGAACGTAAGACCTTTTCAAATTGTAATTTTAATATGAGCAGCCTGATGTCTTTTATTCAGGCAGACTCATTTACTTGTAATAATATTGATGCTGCTAAGATATATGGTATGTGTTTTTCCAGCATAACTATAGATAAGTTTGCTATACCCAATGGTAGGAAGGTTGACCTACAATTGGGTAATTTGGGCTATTTGCAGTCTTTTAATTATAGAATTGATACTACTGCTACAAGTTGTCAGTTGTATTATAATTTACCTGCTGCTAATGTTTCTGTTAGCAGGTTTAATCCTTCTACTTGGAATAGGAGATTTGGTTTTACAGAACAATCTGTTTTTAAGCCTCAACCTGCAGGTGTTTTTACTGCTCATGATGTTGTTTATGCACAACATTGTTTTAAAGCTCCCACAAATTTCTGTCCGTGTAAATTGGATGGGTCTTTGTGTGTAGGTAATGGTCCTGGTATAGATGCTGGTTATAAAACTAGTGGCATAGGCACTTGTCCTGCAGGTACTAATTATTTAACTTGCCATAATGCTGCCCAATGTGATTGTTTGTGCACTCCAGACCCCATTTCATCTAAAGCTACAGGGCCTTACAAGTGCCCCCAAACTAAATATTTAGTTGGCATAGGTGAGCACTGTTCGGGTCTTGCTATTAAAAGTGATTATTGTGGAGGTAATCCTTGTACTTGCCAACCACAAGCATTTTTGGGTTGGTCTGTTGACTCTTGTTTACAAGGGGATAGGTGTAATATTTTTGCTAATTTTATTTTGCATGATGTTAATAGTGGTACTACTTGTTCTACTGATTTACAAAAATCAAACACAGACATAATTCTTGGTGTTTGTGTTAATTATGATCTTTATGGTATTACTGGCCAAGGTATTTTTGTTGAGGTTAATGCGACTTATTATAATAGTTGGCAGAACCTTTTATATGATTCTAATGGTAATCTCTATGGTTTTAGAGACTACTTAACAAATAGAACTTTTATGATTCGTAGTTGCTATAGCGGTCGTGTTTCAGCGGCCTTTCATGCTAACTCTTCCGAACCAGCATTGCTATTTCGGAATATTAAATGCAATTACGTTTTTAATAATACTCTTTCACGACAGCTGCAACCTATTAACTATTTTGATAGCTATCTTGGTTGTGTTGTCAATGCTGATAATAGTACTTCTAGTGTTGTTCAAACATGTGATCTCACAGTAGGTAGTGGTTACTGTGTGGATTACTCTACAAAAAGACGAAGTCGTAGATCGATTACCACTGGTTATCGGTTTACTAATTTTGAGCCATTTACTGTTAATTCAGTAAATGATAGTTTACAACCTGTAGGTGGTTTGTATGAAATTCAAATACCTTCAGAGTTTACTATAGGTAATATGGAGGAGTTTATTCAAACAAGCTCTCCTAAAGTTACTATTGATTGTTCTGCTTTTGTCTGTGGTGATTATGCAGCATGTAAATCACAGTTGGTTGAATATGGTAGCTTCTGTGACAATATTAATGCTATACTCACAGAAGTAAATGAATTACTTGACACTACACAGTTGCAAGTAGCTAATAGTTTAATGAATGGTGTCACTCTTAGCACTAAGCTTAAAGATGGCGTTAATTTCAATGTAGACGACATCAATTTTTCCCCTGTATTAGGTTGTTTAGGAAGCGATTGCAATAAAGTTTCCAGTAGATCTGCTATAGAGGACTTACTTTTTTCTAAAGTAAAGTTATCTGATGTCGGTTTCGTTGAGGCTTATAATAATTGTACTGGAGGTGCCGAAATTAGGGACCTCATTTGTGTGCAAAGTTATAATGGTATCAAGGTGTTGCCTCCACTGCTCTCAGAAAATCAGATCAGTGGATACACTTTGGCTGCCACCTCTGCTAGTCTGTTTCCTCCTTGGTCAGCAGCAGCAGGTGTACCATTTTATTTAAATGTTCAGTATCGTATTAATGGGATTGGTGTTACCATGGATGTGCTAAGTCAAAATCAAAAGCTTATTGCTAATGCATTTAACAATGCTCTTGGTGCTATTCAGGAAGGGTTTGATGCTACCAATTCTGCTTTAGTTAAAATTCAAGCTGTTGTTAATGCAAATGCTGAAGCTCTTAATAACTTATTGCAACAACTCTCTAATAGGTTTGGTGCTATAAGCTCTTCTTTACAAGAAATTCTATCTAGACTGGATGCTCTTGAAGCGCAAGCTCAGATAGACAGACTTATTAATGGGCGTCTTACCGCTCTTAATGCTTATGTTTCTCAACAGCTTAGTGATTCTACACTAGTAAAATTTAGTGCAGCACAAGCTATGGAGAAGGTTAATGAATGTGTCAAAAGCCAATCATCTAGGATAAATTTTTGTGGTAATGGTAATCATATTATATCATTAGTGCAGAATGCTCCATATGGTTTGTATTTTATCCACTTTAGCTATGTCCCTACTAAGTATGTCACTGCGAAGGTTAGTCCCGGTCTGTGCATTGCTGGTGATAGAGGTATAGCCCCTAAGAGTGGTTATTTTGTTAATGTAAATAATACTTGGATGTTCACTGGTAGTGGTTATTACTACCCTGAACCTATAACTGGAAATAATGTTGTTGTTATGAGTACCTGTGCTGTTAACTATACTAAAGCGCCGGATGTAATGCTGAACATTTCAACACCCAACCTCCCTGATTTTAAGGAAGAGTTGGATCAATGGTTTAAAAACCAAACATCAGTGGCACCACATTTGTCACTTGATTATATAAATGTTACATTCTTGGACCTACAAGATGAAATGAATAGGTTACAGGAGGCAATAAAAGTTTTAAATCAGAGCTACATCAATCTCAAGGACATTGGTACTTATGAGTATTATGTAAAATGGCCTTGGTATGTATGGCTTTTAATTGGCTTTGCTGGTGTAGCTATGCTTGTTTTACTATTCTTCATATGCTGTTGTACAGGATGTGGGACTAGTTGTTTTAAGAAATGTGGTGGTTGTTGTGATGATTATACTGGACACCAGGAGTTAGTAATTAAAACATCACATGACGACATGTTTTTGCTTCCTAGATTTGTCCTAGTTAGCTGCATAATTGGTAGCCTAGGTTTTGACAACCCTCCTACCAATGTTGTTTCGCATTTAAATGGAGATTGGTTTTTATTTGGTGACAGTCGTTCAGATTGTAATCATGTTGTTAATACCAACCCCCGTAATTATTCTTATATGGACCTTAATCCTGCCCTGTGTGATTCTGGTAAAATATCATCTAAAGCTGGCAACTCCATTTTTAGGAGTTTTCACTTTACCGATTTTTATAATTACACAGGCGAAGGTCAACAAATTATTTTCTATGAGGGTGTTAATTTTACGCCTTATCATGCCTTTAAATGCACCACTTCTGGTAGTAATGATATTTGGATGCAGAATAAAGGCTTGTTTTACACTCAGGTTTATAAGAATATGGCTGTGTATCGCAGCCTTACTTTTGTTAATGTACCATATGTTTATAATGGCTCTGCACAATCTACAGCTCTTTGTAAATCTGGTAGTTTAGTTCTTAATAACCCTGCATATATAGCTCGTGAAGCTAATTTTGGGGATTATTATTATAAGGTTGAAGCTGATTTTTATTTGTCAGGTTGTGACGAGTATATCGTACCACTTTGTATTTTTAACGGCAAGTTTTTGTCGAATACAAAGTATTATGATGATAGTCAATATTATTTTAATAAAGACACTGGTGTTATTTATGGTCTCAATTCTACTGAAACCATTACCACTGGTTTTGATTTTAATTGTCATTATTTAGTTCTACCCTCTGGTAATTATTTAGCCATTTCAAATGAGCTATTGTTAACTGTTCCTACGAAAGCAATCTGTCTTAATAAGCGTAAGGATTTTACGCCTGTACAGGTTGTTGACTCGCGGTGGAACAATGCCAGGCAGTCTGATAACATGACGGCAGTTGCTTGTCAACCCCCGTACTGTTATTTTCGTAATTCTACTACTAATTATGTTGGTGTTTATGATATCAATCATGGGGATGCTGGTTTTACTAGCATACTCAGTGGTTTGTTATATGACTCACCTTGTTTTTCGCAGCAAGGTGTTTTTAGGTATGATAATGTTAGCAGTGTCTGGCCTCTCTACCCCTATGGCAGATGCCCTACTGCTGCTGATATTAATACCCCTGATGTACCTATTTGTGTGTATGATCCGCTACCAATTATTTTGCTTGGCATTCTTTTGGGTGTTGCGGTCATAATTATTGTAGTTTTGTTGTTATATTTTATGGTGGATAATGGTACTAGGCTGCATGATGCTATGTTTATGGCTGATGCTTATTTTGCAGACACTGTGTGGTATGTGGGGCAAATAATTTTTATAGTTGCCATTTGTTTATTGGTTATAATAGTTGTAGTGGCATTTTTGGCAACTTTTAAATTGTGTATTCAACTTTGCGGTATGTGTAATACCTTAGTACTGTCCCCTTCTATTTATGTGTTTAATAGAGGTAGGCAGTTTTATGAGTTTTACAACGATGTAAAACCACCAGTTCTTGATGTGGATGACGTTATGAGTAGTGTAACTACACCAGCACCAGTTTACACCTGGACTGCTGATGAAGCTATTAAATTCCTAAAGGAATGGAACTTTTCTTTGGGTATTATACTACTTTTTATTACAGTCATATTGCAATTTGGATATACAAGTCGCAGTATGTTTGTTTATGTTATTAAGATGATCATTTTGTGGCTTATGTGGCCCCTTACTATCATCTTAACTATTTTCAATTGCGTGTATGCGTTGAATAATGTGTATCTTGGCTTTTCTATAGTTTTTACTATAGTGGCCATTATCATGTGGATTGTGTATTTTGTGAATAGTATCAGGTTGTTTATTAGAACTGGAAGTTGGTGGAGTTTCAACCCAGAAACAAACAACTTGATGTGTATAGATATGAAGGGAAGGATGTATGTTAGGCCGATAATTGAGGACTACCATACCCTTACAGTCACAATAATACGTGGTCATCTTTACATGCAAGGTATAAAACTAGGTACTGGCTATTCTTTGTCAGATTTGCCAGCTTATGTGACTGTTGCCAAGGTCTCACACCTGCTCACGTATAAGCGTGGTTTTCTTGACAAGATAGGCGATACTAGTGGTTTTGCTGTTTATGTTAAGTCCAAAGTCGGTAATTACCGACTGCCATCAACCCAAAAGGGTTCTGGCATGGACACCGCATTGTTGAGAAATAATATCATGTCTTTTACTCCTGGTAAGCAATCCAGTAGTAGAGCGTCCTCTGGAAATCGTTCTGGTAATGGCATCCTTAAGTGGGCCGATCAGTCCGACCAATCTAGAAATGTTCAAACCAGGGGTAGAAGAGCTCAACCCAAGCAAACTGCTACTTCTCAGCAACCATCAGGAGGGAATGTTGTACCCTACTATTCTTGGTTCTCTGGAATTACTCAGTTTCAAAAGGGAAAGGAGTTTGAATTTGCAGAGGGACAAGGTGTGCCTATTGCACCAGGAGTCCCAGCTACTGAAGCTAAGGGGTACTGGTACAGACACAACAGACGTTCCTTTAAAACAGCCGATGGCAACCAGCGTCAATTGCTGCCACGATGGTATTTTTACTATCTTGGAACAGGACCGCATGCCAAAGACCAGTATGGCACCGACATTGACGGAGTCTTCTGGGTCGCTAGTAACCAGGCTGATGTCAATACCCCGGCTGACATTCTCGATCGGGACCCAAGTAGCGATGAGGCTATTCCGACTAGGTTTCCGCCTGGCACGGTACTCCCTCAGGGTTACTATATTGAAGGCTCAGGAAGGTCTGCTCCTAATTCCAGATCTACTTCACGCGCATCCAGTAGAGCCTCTAGTGCAGGATCGCGCAGTAGAGCCAATTCTGGCAATAGAACCCCTACCTCTGGTGTAACACCTGATATGGCTGATCAAATTGCTAGTCTTGTTCTGGCAAAACTTGGCAAGGATGCCACTAAGCCACAGCAAGTAACTAAGCAGACTGCCAAAGAAATCAGACAGAAAATTTTGAATAAGCCCCGCCAGAAGAGGAGCCCCAATAAACAATGCACTGTTCAGCAGTGTTTTGGGAAGAGAGGCCCCAATCAGAATTTTGGTGGTGGAGAAATGTTAAAACTTGGAACTAGTGATCCACAGTTCCCCATTCTTGCAGAACTCGCACCCACAGCTGGTGCGTTTTTCTTTGGATCAAGATTAGAGTTGGCCAAAGTGCAGAATTTGTCTGGGAATCTTGACGAGCCCCAGAAGGATGTTTATGAATTGCGCTATAATGGCGCAATTAGATTTGACAGTACACTTTCAGGTTTTGAGACCATAATGAAGGTGTTGAATGAGAATTTGAATGCATACCAACAACAAGATGGTATGATGAATATGAGTCCAAAACCACAGCGTCAGCGTGGTCAGAAGAATGGACAAGGAGAAAATGATAATATAAGTGTTGCAGCGCCCAAAAGCCGTGTGCAGCAAAATAAGAGTAGAGAGTTGACTGCAGAGGACATCAGCCTTCTTAAGAAGATGGATGAGCCCTTTACTGAAGACACCTCAGAAATA
>gi|251748088|gb|FJ938064.1|_Bovine_coronavirus_E-AH187-TC_complete_genome
ATGTCGAAGATCAACAAATACGGTCTCGAACTACACTGGGCTCCAGAATTTCCATGGATGTTTGAGGACTCAGAGGAGAAGTTGGACAACCCTAGTAGTTCAGAGGTGGATATAGTATGCTCCACCACTGCGCAAAAGCTGGAAACAGGCGGAATTTGTCCTGAAAATCATGTGATGGTGGATTGTCGCCGACTTCTTAAACAAGAATGTTGTGTGCAGTCTAGCCTAATACGTGAAATTGTTATGAATACACGTCCATATGATTTGGAGGTGCTACTTCAAGATGCTTTGCAGTCCCGCGAAGCAGTTTTGGTTACACCCCCTCTAGGTATGTCTCTGGAGGCATGCTATGTGAGAGGTTGTAATCCTAATGGATGGACCATGGGTTTGTTTCGGCGTAGAAGTGTGTGTAACACTGGTCGCTGCGCTGTTAACAAGCATGTGGCCTATCAGCTATATATGATTGATCCTGCGGGTGTCTGTTTTGGTGCAGGTCAATTTGTGGGTTGGGTTATACCCTTAGCCTTTATGCCTGTGCAATCCCGGAAATTTATTGTTCCTTGGGTTATGTACTTGCGTAAGTGTGGCGAAAAGGGTGCCTACAACAAAGATCATAAACGTGGCGGTTTTGAACACGTTTATAATTTTAAAGTTGAGGATGCTTACGACTTGGTTCATGATGAGCCTAAGGGTAAGTTTTCTAAGAAGGCTTATGCTTTAATTAGAGGATACCGTGGTGTTAAACCGCTTCTTTATGTAGACCAGTATGGTTGTGATTATACTGGTGGTCTTGCAGATGGCTTAGAGGCTTATGCTGATAAGACATTGCAAGAAATGAAGGCATTATTTCCTATTTGGAGCCAGGAACTCCCTTTTGATGTAACTGTGGCATGGCACGTTGTGCGTGATCCACGTTATGTTATGAGACTGCAGAGTGCTTCTACTATACGTAGTGTTGCATATGTTGCTAACCCTACTGAAGACTTGTGTGATGGTTCTGTTGTCATAAAGGAACCTGTGCATGTTTATGCGGATGACTCTATTATTTTACGTCAACATAATTTAGTTGACATTATGAGTTGTTTTTATATGGAGGCAGATGCAGTTGTAAATGCTTTTTATGGTGTTGATTTGAAACATTGTGGTTTTGTTATGCAGTTTGGTTATATTGACTGCGAACAAGACTTGTGTGATTTTAAAGGTTGGGTTCCTGGTAATATGATAGATGGTTTTGCTTGCACTACTTGTGGTCATGTCTATGAGACAGGTAATTTGCTAGCACAATCTTCAGGTGTTCTGCCTGTTAATCCTGTATTGCATACTAAGAGTGCAGCAGGTTATGGTGGTTTTGGTTGTAAGGATTCTTTTACCCTGTATGGCCAAACTGTAGTTTATTTTGGAGGTTGTGTGTATTGGAGTCCAGCACGTAATATATGGATTCCTATATTAAAATCTTCTGTTAAGTCTTATGACGGTTTGGTTTATACTGGAGTTGTAGGTTGCAAGGCTATTGTAAAGGAAACAAATCTCATTTGCAAAGCGTTGTACCTTGATTATGTTCAACACAAGTGTGGCAATTTACACCAGCGGGAGTTGCTAGGTGTGTCAGATGTGTGGCATAAACAATTGTTATTAAATAGAGGTGTGTACAAACCTCTTTTAGAGAATATTGATTATTTTAATATGCGGCGCGCTAAATTTAGTTTAGAAACTTTTACTGTTTGTGCAGATGGTTTTATGCCTTTTCTTTTAGATGATTTGGTTCCGCGCGCATATTATTTGGCAGTAAGTGGTCAAGCATTTTGTGACTACGCAGATAAAATCTGCCATGCTGTTGTGTCTAAGAGTAAAGAGTTACTTGATGTGTCTTTGGATTCTTTAAGTGCAGCTATACATTATTTGAATTCTAAAATTGTTGATTTGGCTCAACATTTTAGTGATTTTGGAACAAGTTTTGTTTCTAAAATTGTTCATTTCTTTAAGACTTTTACTACTAGCACTGCTCTTGCATTTGCATGGGTTTTATTTCATGTTTTGCATGGTGCTTATATAGTAGTAGAGAGTGATATATATTTTGTTAAAAACATTCCTCGTTATGCTAGTGCTGTTGCACAAGCATTTCGGAGTGTTGCTAAAGTTGTACTGGACTCTTTAAGAGTTACTTTTATTGATGGCCTTTCTTGTTTTAAGATTGGACGTAGAAGAATTTGTCTCTCAGGCAGTAAAATTTATGAAGTTGAGCGTGGCTTGTTACATTCATCTCAATTGCCATTAGATGTTTATGATTTAACCATGCCTAGTCAAGTTCAGAAAGCCAAGCAAAAACCTATTTATTTAAAAGGTTCTGGTTCTGATTTTTCATTAGCAGATAGTGTGGTTGAAGTTGTTACAACTTCACTTACACCATGTGGTTATTCTGAACCACCTAAAGTTGCAGATAAAATTTGCATTGTGGATAATGTTTATATGGCCAAGGCTGGTGACAAATATTACCCTGTTGTGGTTGATGGTCATGTAGGACTCTTGGATCAAGCATGGAGGGTTCCTTGTGCTGGAAGGCGTGTTACATTTAAGGAACAGCCTACAGTAAATGAGATTGCAAGCACACCTAAGACTATTAAAGTTTTTTATGAGCTTGACAAAGATTTTAATACTATTTTAAACACTGCATGTGGAGTGTTTGAAGTAGATGATACCGTGGATATGGAGGAATTTTATGCTGTGGTGGTTGATGCCATAGAAGAGAAACTTTCTCCATGTAAGGAGCTTGAAGGTGTAGGTGCTAAAGTTAGTGCCTTTTTACAGAAATTAGAGGATAATTCCCTATTTTTATTTGATGAGGCTGGCGAGGAAGTTCTTGCTTCTAAATTGTATTGTGCTTTTACAGCTCCTGAAGATGATGACTTTCTTGAAGAAAGTGGTGTTGAAGAAGATGATGTAGAAGGTGAGGAAACTGATTTAACTGTCACAAGTGCTGGAGAGCCTTGTGTTGCCAGTGAACAGGAGGAGTCTTCTGAAATCTTAGAGGACACTTTGGATGATGGTCCATGTGTGGAGACATCTGATTCACAAGTTGAAGAAGATGTAGAAATGTCGGATTTTGCTGATCTTGAATCTGTGATTCAGGATTATGAAAATGTTTGTTTTGAGTTTTATACTACAGAGCCAGAATTTGTTAAAGTTTTGGATCTGTATGTGCCTAAAGCAACTCGCAACAATTGCTGGTTGCGATCAGTTTTGGCAGTGATGCAGAAACTGCCCTGTCAATTTAAAGATAAAAATTTGCAGGATCTTTGGGTGTTATATAAGCAACAGTATAGTCAGTTGTTTGTTGATACCTTGGTTAATAAGATACCTGCTAATATTGTAGTTCCACAAGGTGGTTATGTTGCCGATTTTGCATATTGGTTCTTAACCTTATGTGATTGGCAGTGTGTTGCATACTGGAAATGCATTAAATGTGATTTAGCTCTTAAGCTTAAAGGCTTGGATGCTATGTTCTTTTATGGTGATGTTGTCTCACATGTGTGCAAGTGTGGTGAGTCTATGGTACTTATTGATGTTGATGTGCCATTTACAGCCCACTTTGCTCTTAAAGATAAGTTGTTTTGTGCATTTATTACTAAGCGTAGTGTGTACAAAGCAGCTTGTGTTGTGGATGTTAATGATAGTCATTCTATGGCTGTTGTTGATGGTAAACAAATTGATGATCATCGTGTCACTAGTATTACTAGTGATAAGTTTGATTTTATTATTGGGCATGGTATGTCATTTTCAATGACTACTTTCGAAATTGCCCAATTGTATGGTTCTTGTATAACACCTAATGTATGTTTTGTTAAAGGTGATATAATTAAAGTTTCTAAGCGTGTTAAAGCAGAAGTCGTTGTAAATCCTGCTAATGGCCATATGGCACATGGTGGTGGTGTTGCAAAGGCTATTGCAGTAGCAGCTGGACAGCAGTTTGTTAAAGAGACTACCGATATGGTTAAGTCTAAAGGAGTTTGTGCCACTGGAGACTGTTATGTCTCTACAGGGGGTAAATTATGTAAAACTGTGCTTAATGTTGTTGGACCTGATGCGAGAACACAGGGTAAACAAAGTTATGCATTGTTAGAGCGTGTTTATAAACATCTTAACAAATATGATTGTGTTGTTACAACTTTGATATCAGCTGGTATATTTAGTGTGCCTTCTGATGTGTCTTTAACATATCTACTTGGTACTGCCGAGAAACAAGTTGTTCTTGTTAGCAATAATCAAGAGGATTTTGATCTTATTTCTAAGTGTCAGATAACTGCCGTTGAGGGCACTAAGAAATTGGCAGAGCGTCTTTCTTTTAATGTAGGGCGTTCTATCGTTTACGAAACAGATGCTAATAAGTTGATTTTAAGCAATGACGTTGCATTTGTTTCGACATTTAATGTCTTACAGGATGTTTTATCCTTAAGACATGATATAGCACTTGATGATGATGCACGAACCTTTGTTCAGAGCAATGTTGATGTTGTACCTGAGGGTTGGCGTGTTGTCAATAAGTTTTACCAAATTAATGGTGTTAGAACCGTTAAGTATTTTGAGTGTCCCGGTGGCATAGATATATGCAGCCAGGATAAAGTTTTTGGTTATGTACAGCAGGGTAGTTTTAATAAGGCTACTGTTGCTCAAATTAAAGCCTTGTTTTTGGATAAAGTGGACATCTTGCTAACTGTTGATGGTGTCAATTTCACTAACAGGTTTGTGCCTGTAGGTGAAAATTTTGGTAAGAGTCTAGGAAATGTGTTCTGTGATGGAGTTAATGTCACGAAACATAAGTGTGATATAAATTATAAAGGTAAAGTCTTTTTCCAGTTTGATAATCTTTCTAGTGAAGATTTAAAGGCTGTAAGAAGTTCTTTTAATTTTGATCAGAAGGAATTGCTTGCCTACTACAACATGCTTGTTAATTGTTCTAAATGGCAGGTTGTTTTTAATGGTAAGTATTTCACTTTTAAGCAAGCTAATAACAATTGTTTTGTTAATGTTTCTTGCTTAATGCTCCAGAGTTTGAATCTGAAATTTAAAATTGTTCAATGGCAGGAGGCGTGGCTTGAATTTCGTTCTGGTCGCCCTGCTAGATTTGTATCTTTGGTTTTGGCCAAAGGTGGGTTTAAATTTGGTGATCCTGCTGATTCTAGAGATTTCTTGCGTGTTGTGTTTAGTCAAGTTGATTTGACAGGGGCAATATGTGATTTTGAAATTGCATGTAAATGTGGTGTAAAGCAGGAACAGCGTACTGGTGTTGACGCTGTTATGCATTTTGGTACATTGAGTCGTGAAGATCTTGAGATTGGTTACACCGTGGATTGTTCTTGTGGTAAAAAGCTAATCCATTGTGTACGATTTGATGTACCATTTTTAATTTGTAGTAATACACCTGCTAGTGTAAAATTACCTAAGGGTGTAGGAAGTGCAAATATTTTTAAAGGTGATAAGGTTGGTCATTATGTTCATGTTAAGTGTGAACAGTCTTATCATCTTTATGATGCTTCTAATGTTAAGAAGGTTACAGACGTTACTGGCAATTTGTCAGATTGTTTGTATCTTAAAAATTTGAAACAAACTTTTAAATCGGTGTTAACCACCTATTATTTGGATGATGTTAAGAAAATTGAGTATAAACCTGACTTGTCACAATATTATTGTGACGGAGGTAAGTATTATACTCAGCGTATTATTAAAGCCCAATTTAAAACATTTGAGAAAGTAGATGGTGTGTATACTAATTTTAAATTGATAGGACACACCATCTGTGATATTCTTAATGCTAAGTTGGGTTTTGATAGCTCTAAAGAGTTTGTTGAATATAAAGTTACTGAGTGGCCAACAGCTACAGGTGATGTGGTGTTGGCTACTGATGATTTGTATGTTAAGAGATATGAAAGGGGTTGTATTACTTTTGGTAAACCTGTTATATGGTTAAGCCATGAGCAAGCTTCCCTCAATTCTTTAACATATTTTAATAGACCTTTATTGGTTGATGAGAATAAATTTGATGTTTTAAAAGTGGATGATGTTGACGATGGTGGTGATATCTCAGAGAGTGATGCCAAAGAATCCAAAGAAATCAACATTATTAAGTTAAGTGGTGTTAAAAAACCATTTAAGGTTGAAGATAGTGTCATTGTTAATGATGATACTAGTGAAATCAAATATGTTAAGAGTTTGTCTATAGTTGATGTGTATGATATGTGGCTTACAGGTTGTAGGTATGTTGTTAGAACTGCTAATGATTTGAGCATGGCAGTTAACGTACCTACAATACGTAAGTTTATAAAATTTGGTATGACTCTTGTTAGTATACCAATTGATTTGTTAAATTTAAGAGAGATTAAGCCTGTTTTTAATGTGGTTAAAGCTGTGCGAAATAAAATTTCTGCATGCTTTAATTTTATTAAATGGCTTTTTGTCTTATTATTTGGCTGGATCAAAATATCCGCTGATAATAAAGTAATTTACACCACAGAAGTTGCATCAAAGCTTACATGTAAGCTTGTAGCTTTAGCTTTTAAAAATGCGTTTTTGACATTTAAGTGGAGTGTGGTTGCTAGAGGTGCTTGCATTATAGCGACTATATTTCTATTGTGGTTTAATTTTATATATGCCAATGTAATTTTTAGTGATTTTTATTTGCCTAAAATTGGTTTCTTGCCGACTTTTGTTGGTAAGATCGCACAGTGGATTAAGAGCACTTTTAGTCTTGTAACTATTTGTGATCTATATTCCATTCAGGATGTGGGTTTTAAGAATCAGTATTGTAATGGAAGTATCGCATGTCAATTCTGCTTGGCAGGATTTGATATGTTAGATAATTATAAAGCCATTGATGTAGTACAGTATGAAGCTGATAGGAGAGCATTTGTTGATTATACAGGTGTGTTAAAGATTGTCATTGAATTGATAGTTAGTTACGCCCTGTATACGGCATGGTTCTACCCATTGTTTGCTCTTATTAGTATTCAGATCTTGACCACTTGGCTGCCTGAGCTTTTTATGCTTAGTACATTACATTGGAGTGTTAGGTTGCTGGTGTCTTTAGCTAATATGTTACCAGCACATGTGTTTATGAGGTTCTATATTATTATTGCCTCTTTTATTAAGCTGTTTAGCTTGTTTAGGCATGTTGCCTATGGTTGTAGTAAACCTGGTTGTTTGTTTTGTTACAAGAGGAATCGTAGTCTACGTGTTAAATGTAGTACTATTGTTGGTGGCATGATACGCTATTACGATGTTATGGCTAATGGTGGCACTGGCTTTTGTTCAAAACATCAATGGAATTGCATTGATTGTGATTCTTATAAACCAGGTAATACTTTTATTACTGTTGAGGCCGCTCTTGATTTATCTAAGGAATTGAAACGGCCTATTCAGCCTACAGATGTTGCTTATCATACGGTTACGGATGTTAAGCAAGTTGGTTGTTATATGCGCTTGTTCTATGAGCGTGATGGACAGCGCACATATGATGATGTTAATGCTAGTTTGTTTGTGGATTATAGTAATTTGCTACATTCTAAGGTTAAGGGTGTGCCTAATATGCATGTTGTGGTAGTGGAAAATGATGCCGATAAAGCTAATTTTCTTAATGCTGCTGTATTTTATGCACAGTCTTTGTTTAGACCTATTTTAATGGTTGATAAAAATCTGATAACTACTGCTAATACTGGTACGTCTGTTACAGAAACTATGTTTGATGTTTATGTGGACACATTTTTGTCTATGTTTGATGTGGATAAAAAGAGTCTTAATGCTTTAATAGCAACTGCGCATTCTTCTATAAAACAGGGTACGCAGATTTGTAAAGTTTTGGATACCTTTTTAAGCTGTGCTCGTAAAAGTTGTTCTATTGATTCAGATGTTGATACTAAGTGTTTAGCTGATTCTGTCATGTCTGCTGTATCGGCAGGCCTTGAATTGACGGATGAAAGTTGTAATAACTTGGTGCCAACATATTTGAAGGGTGATAACATTGTGGCAGCAGATTTAGGTGTTCTGATTCAAAATTCTGCTAAGCATGTGCAGGGTAATGTTGCTAAAATAGCCGGTGTTTCCTGTATATGGTCTGTGGATGCTTTTAATCAGCTAAGTTCTGATTTCCAGCATAAATTGAAGAAAGCATGTTGTAAAACTGGTTTGAAATTGAAGCTTACTTATAATAAGCAGATGGCTAATGTCTCTGTTTTAACTACACCCTTTAGTCTTAAAGGGGGTGCAGTTTTTAGTTATTTTGTTTATGTATGTTTTCTGTTGAGTTTGGTTTGTTTTATTGGATTGTGGTGCTTAATGCCCACTTACACAGTACACAAATCAGATTTTCAGCTTCCCGTTTATACCAGTTATAAAGTTTTAGATAATGGTGTTATTAGAGATGTTAGCGTTGAAGATGTTTGTTTCGCTAACAAATTTGAACAATTTGATCAATGGTATGAGTCTACATTTGGTCTAAGTTATTATAGTAACAGTATGGCTTGTCCCATTGTTGTTGCTGTAGTAGACCAGGATCTTGGCTCTACTGTGTTTAATGTCCCTACCAAAGTGTTACGATATGGTTACCATGTGTTGCACTTTATTACACATGCACTTTCTGCTGATGGAGTGCAGTGTTATACGCCACATAGTCAAATATCGTATTCTAATTTTTATGCTAGTGGCTGTGTGCTTTCCTCCGCTTGTACTATGTTTGCAATGGCCGATGGTAGTCCACAACCTTATTGTTATACAGAGGGGCTTATGCAGAATGCTTCTCTGTATAGTTCATTGGTACCTCACGTGCGGTATAATCTTGCTAATGCTAAAGGTTTTATCCGTTTTCCAGAAGTGTTGCGAGAAGGACTTGTGCGTATTGTGCGTACTCGTTCTATGTCGTATTGCAGAGTTGGATTATGTGAGGAAGCTGATGAGGGTATATGCTTTAACTTTAATGGTTCTTGGGTGCTTAATAATGATTATTATAGATCATTGCCTGGGACCTTTTGTGGTAGAGATGTTTTTGACTTAATTTATCAGCTTTTTAAAGGTTTAGCACAGCCTGTGGATTTCTTGGCATTGACTGCTAGTTCTATTGCTGGTGCTATACTTGCTGTAATTGTTGTTTTGGTGTTTTATTACTTAATAAAGCTTAAACGTGCTTTTGGTGATTACACCAGTATTGTTTTTGTCAATGTGATTGTGTGGTGTGTAAATTTTATGATGCTTTTTGTGTTTCAAGTTTACCCTACACTTTCTTGTGTATATGCTATTTGTTATTTTTATGCCACGCTTTATTTCCCTTCGGAGATAAGTGTGATAATGCATTTACAATGGCTAGTTATGTATGGCACTATTATGCCTTTATGGTTTTGTTTGCTATATATATCTGTTGTTGTTTCAAATCATGCTTTTTGGGTATTTGCTTACTGCAGACGGCTTGGTACTTCTGTTCGTAGTGATGGTACATTTGAAGAAATGGCTCTTACTACTTTTATGATTACAAAAGATTCTTATTGTAAGCTTAAGAATTCTTTGTCTGATGTTGCTTTTAATAGATATTTGAGTTTGTATAATAAATATAGGTATTACAGCGGTAAAATGGATACTGCTGCATATAGGGAGGCTGCTTGTTCTCAGTTGGCTAAAGCAATGGATACATTTACCAATAATAATGGTAGTGATGTGCTTTACCAACCACCTACTGCTTCCGTTTCAACTTCATTCTTGCAATCTGGTATTGTGAAAATGGTTAATCCTACTTCTAAGGTAGAACCATGTATTGTCAGTGTTACCTATGGTAATATGACATTGAATGGTTTATGGTTGGATGATAAGGTCTACTGTCCCAGACATGTGATATGTTCTGCTTCAGATATGACTAATCCAGATTATACAAATTTGTTGTGTAGAGTAACATCAAGTGATTTTACTGTATTGTTTGATCGTTTAAGCCTTACAGTGATGTCTTATCAAATGCAGGGTTGTATGCTTGTTCTTACAGTGACCCTGCAAAATTCTCGTACGCCAAAATATACATTTGGTGTGGTTAAACCTGGTGAGACTTTTACTGTTTTAGCTGCTTATAACGGCAAACCACAAGGAGCCTTTCATGTGACTATGCGTAGTAGTTATACCATTAAGGGTTCCTTTTTGTGCGGATCTTGTGGATCTGTTGGTTATGTGCTAATGGGTGATTGTGTTAAATTTGTGTATATGCATCAATTGGAGCTTAGTACTGGTTGTCATACTGGTACTGATTTCAATGGGGATTTTTATGGTCCTTATAAGGATGCTCAGGTTGTCCAATTGCCCGTTCAGGATTATATACAATCTGTTAATTTTGTAGCATGGCTTTATGCTGCTATACTTAATAATTGTAATTGGTTTGTACAAAGTGATAAGTGTTCTGTTGAAGATTTTAATGTGTGGGCTTTGTCTAATGGGTTTAGCCAAGTTAAGTCTGATCTTGTTATAGATGCTTTAGCTTCTATGACTGGTGTGTCTTTGGAAACACTATTGGCTGCTATTAAGCGTCTCAAGAATGGTTTTCAAGGACGTCAGATTATGGGTAGTTGCTCCTTTGAGGATGAATTGACACCTAGCGATGTTTATCAACAACTCGCTGGTATCAAGTTACAATCAAAGCGTACTAGATTGGTTAAAGGCATTGTTTGTTGGATTATGGCTTCTACATTTTTGTTTAGTTGTATAATTACAGCATTTGTGAAATGGACTATGTTTATGTATGTAACTACTAATATGCTTAGTATTACGTTTTGTGCACTTTGTGTTATAAGTTTGGCCATGTTGTTGGTTAAACATAAGCATCTTTATTTGACTATGTATATAATTCCTGTGCTTTTTACACTGCTGTATAACAACTATTTGGTTGTGTACAAGCAGACATTTAGAGGCTATGTTTATGCATGGCTATCATATTATGTTCCATCAGTTGAGTATACTTATACTGATGAAGTTATTTATGGCATGTTATTGCTTATAGGAATGGTCTTTGTTACATTACGTAGCATTAACCATGATTTGTTCTCTTTTATAATGTTTGTTGGCCGTGTGATTTCTGTTGTCTCTTTGTGGTACATGGGTTCTAACTTAGAGGAAGAAATTCTTCTTATGTTGGCTTCTCTTTTTGGTACTTACACATGGACAACAGCTTTATCTATGGCTGCAGCAAAGGTTATTGCTAAGTGGGTTGCTGTGAATGTTTTGTATTTCACAGATATACCTCAAATTAAGATAGTGCTTGTATGCTATTTGTTTATAGGTTATATTATTAGCTGTTATTGGGGTTTGTTTTCCTTGATGAACAGTTTGTTTAGAATGCCTTTGGGTGTTTATAATTATAAAATTTCAGTACAGGAATTAAGATATATGAATGCTAATGGATTGCGCCCTCCTAAGAATAGTTTTGAAGCCCTTATGCTTAATTTTAAGCTTTTGGGTATTGGAGGTGTGCCAATTATTGAAGTATCTCAATTTCAATCAAAATTGACTGATGTTAAATGTGCTAATGTTGTCTTGCTTAATTGCTTGCAACATTTGCATGTTGCTTCTAACTCTAAGTTGTGGCAGTATTGTAGCACTTTGCACAATGAAATACTTGCCACTTCTGATCTGGGTGTTGCTTTTGAAAAGCTTGCTCAGTTGTTAATTGTTTTGTTTGCTAATCCAGCTGCTGTGGATAGCAAGTGCCTGACTAGTATTGAAGAAGTTTGCGACGATTACGCAAAGGACAATACTGTTTTGCAGGCTTTACAGAGTGAATTTGTTAATATGGCTAGCTTCGTTGAATATGAAGTTGCTAAGAAAAATCTTGATGAGGCGCGTTCTAGTGGTTCTGCTAATCAACAGCAGTTAAAACAGCTAGAGAAAGCCTGTAATATTGCTAAATCTGCTTATGAACGCGACCGTGCTGTAGCAAGAAAGTTGGAGCGTATGGCAGATTTGGCTCTCACTAATATGTATAAAGAAGCTAGAATTAATGATAAGAAGAGTAAGGTTGTTTCTGCCTTGCAAACTATGCTTTTTAGTATGGTGCGTAAGTTAGATAATCAAGCTCTGAATTCAATATTAGATAATGCTGTGAAGGGTTGTGTACCATTGAATGCAATCCCTTCATTGGCTGCAAATACTCTGACTATAATTGTACCAGATAAAAGTGTTTACGATCAGGTAGTTGACAATGTCTATGTTACCTATGCGGGTAATGTATGGCAGATTCAAACTATCCAAGATTCAGATGGTACAAATAAGCAGTTGAATGAGATATCTGATGATTGTAACTGGCCACTAGTTATTATTGCAAATCGGCATAATGAGGTATCTGCAACCGTTTTGCAAAATAATGAATTAATGCCTGCTAAGTTGAAAACTCAGGTCGTTAATAGTGGTCCAGATCAGACTTGTAACACACCTACTCAATGTTACTATAATAATAGTAACAATGGGAAGATTGTTTATGCTATACTTAGTGATGTTGATGGTCTTAAGTATACAAAGATTCTTAAAGATGATGGCAATTTTGTTGTTTTGGAGTTAGATCCTCCTTGTAAATTTACTGTTCAAGATGTTAAAGGTCTTAAAATTAAGTACCTTTATTTTGTAAAAGGTTGTAACACACTAGCAAGAGGCTGGGTTGTTGGTACAATTTCTTCTACAGTTAGATTGCAAGCTGGAACTGCTACTGAGTATGCTTCCAACTCATCTATATTATCTTTATGTGCGTTTTCTGTAGATCCTAAGAAAACGTATTTAGATTTTATACAGCAGGGAGGAACACCTATTGCTAATTGTGTTAAAATGTTGTGTGACCATGCTGGTACCGGTATGGCCATTACTGTTAAACCCGATGCTACCACTAATCAGGATTCATATGGTGGTGCGTCTGTTTGTATATATTGCCGCGCACGAGTTGAACACCCAGATGTTGATGGGTTGTGCAAATTACGCGGCAAGTTTGTACAAGTGCCTGTAGGTATAAAAGATCCTGTGTCTTATGTTTTGACACATGATGTTTGTCAAGTTTGTGGATTTTGGCGGGATGGAAGTTGTTCATGTGTTAGCACTGACACTACTGTTCAGTCAAAAGATACTAATTTTTTAAACCGGGGTACGAGTGTAGATGCCCGTCTCGTACCCTGTGCCAGTGGTTTATCTACTGATGTACAATTAAGGGCATTTGATATTTGCAATGCTAGTGTTGCTGGCATTGGTTTACATTTAAAAGTTAATTGCTGCCGTTTTCAGCGTGTTGATGAGAACGGTGATAAATTAGATCAGTTCTTTGTTGTTAAGAGGACAGATCTGACTATATATAATAGAGAGATGGAATGCTATGAGCGTGTAAAAGATTGTAAGTTTGTGGCTGAACACGATTTCTTTACATTTGATGTAGAAGGTAGTCGTGTGCCACATATTGTACGCAAGGATTTAACAAAGTATACTATGTTGGATCTTTGCTATGCGTTGCGACATTTTGATCGCAATGATTGCATGCTGCTTTGTGACATTCTCTCTATATATGCTGGTTGTGAACAATCCTACTTTACTAAGAAGGATTGGTATGATTTTGTTGAAAATCCTGATATTATTAATGTTTATAAAAAGCTAGGACCTATTTTTAATAGAGCCCTAGTTAGCGCTACTGAGTTTGCAGACAAATTGGTGGAGGTAGGCTTAGTAGGCATTTTAACACTTGATAACCAAGATTTAAATGGTAAATGGTATGATTTTGGTGACTATGTTATTGCAGCCCCAGGTTGTGGTGTTGCTATAGCAGACTCTTATTATTCTTATATGATGCCTATGCTGACCATGTGTCATGCATTGGATTGTGAATTGTATGTGAATAATGCTTATAGACTATTTGATCTTGTACAGTATGATTTTACTGATTACAAGCTCGAATTGTTTAATAAGTATTTTAAGCACTGGAGTATGCCATACCATCCTAACACGGTTGATTGTCAGGATGATCGGTGTATCATACATTGTGCTAATTTTAACATACTTTTTAGTATGGTTTTACCTAATACATGTTTTGGGCCTCTTGTTAGGCAAATTTTTGTGGATGGTGTTCCTTTTGTTGTTTCAATTGGATACCATTATAAAGAACTTGGTATTGTGATGAATATGGATGTGGATACACATCGTTATCGCTTGTCTTTAAAAGACTTGCTTTTATATGCTGCTGATCCAGCTTTGCATGTAGCTTCTGCTAGTGCATTGTATGATTTACGCACTTGCTGTTTTAGTGTTGCGGCTATAACAAGCGGTGTAAAATTTCAAACAGTTAAACCTGGTAATTTTAATCAGGATTTTTATGATTTTATTTTAAGTAAGGGCCTGCTTAAAGAGGGTAGTTCAGTTGATCTGAAGCACTTTTTCTTTACGCAGGATGGTAATGCTGCTATTACTGATTATAATTATTATAAGTACAATTTGCCCACCATGGTGGACATTAAGCAGTTGTTGTTTGTTTTGGAAGTTGTTTATAAGTATTTTGAGATCTATGATGGTGGGTGTATACCGGCATCACAAGTCATTGTTAATAATTATGATAAGAGTGCTGGCTATCCATTTAATAAATTTGGAAAAGCCAGGCTCTATTATGAAGCATTATCATTTGAGGAGCAGGATGAAATTTACGCCTATACTAAGCGCAATGTCCTGCCAACACTTACTCAAATGAATTTGAAATATGCTATTAGTGCTAAGAATAGAGCCCGCACTGTTGCTGGTGTTTCCATACTTAGTACTATGACTGGCAGAATGTTTCATCAAAAGTGTTTGAAAAGTATAGCAGCTACACGTGGTGTTCCTGTTGTTATAGGCACCACTAAATTTTATGGCGGCTGGGACGATATGTTACGTCGCCTTATTAAAGATGTTGATAATCCTGTACTTATGGGTTGGGATTATCCTAAGTGTGATCGGGCTATGCCAAACATACTACGTATTGTTAGTAGTCTGGTTTTGGCTCGAAAACATGAGGCATGTTGTTCGCAAAGCGATAGGTTTTATCGACTTGCGAATGAATGCGCACAAGTTCTGAGTGAAATTGTTATGTGTGGTGGCTGTTATTATGTTAAGCCTGGTGGCACTAGTAGTGGTGATGCAACTACTGCTTTTGCTAATTCAGTTTTTAACATATGTCAAGCTGTTTCAGCCAATGTATGTGCTTTAATGTCATGCAATGGTAATAAGATTGAAGATTTGAGTATACGTGCTCTTCAGAAGCGCTTATACTCACATGTGTATAGAAGTGATATGGTTGATTCAACCTTTGTCACAGAATATTATGAATTTTTAAATAAGCATTTTAGTATGATGATTTTGAGTGATGATGGCGTTGTGTGTTATAATTCTGATTATGCGTCCAAAGGGTATATTGCTAATATAAGTGCCTTTCAACAGGTATTGTATTATCAAAATAACGTTTTTATGTCAGAATCCAAATGTTGGGTTGAAAATGACATAAACAATGGACCTCATGAATTCTGTTCACAACACACAATGCTTGTAAAGATGGATGGGGACGATGTCTATCTTCCATATCCTGATCCTAGTCGTATATTAGGAGCTGGATGTTTTGTAGATGATTTGTTAAAGACTGATAGTGTTCTTTTAATAGAACGATTTGTAAGTCTTGCAATAGATGCTTATCCACTTGTGTACCACGAAAATGAAGAATACCAAAAGGTTTTTCGTGTTTATTTGGAGTATATAAAGAAGTTGTACAATGACCTGGGTAATCAGATCTTGGATAGCTACAGTGTTATTTTAAGTACTTGTGATGGACAAAAGTTTACTGATGAGTCCTTTTACAAGAACATGTATTTAAGAAGTGCAGTTATGCAGAGTGTTGGAGCTTGCGTGGTCTGCTCTTCTCAAACATCATTACGTTGTGGCAGTTGCATCAGAAAGCCTCTTCTTTGCTGCAAGTGTTGTTACGATCACGTTATGGCAACTGATCATAAATATGTTTTGAGTGTTTCACCATATGTGTGTAACGCACCAGGATGTGATGTAAATGATGTTACCAAATTGTATCTAGGTGGTATGTCATATTATTGTGAAGATCATAAGCCACAATATTCGTTTAAGTTGGTAATGAATGGTATGGTTTTTGGTCTATATAAACAATCTTGTACAGGATCTCCGTACATAGATGATTTTAATCGTATAGCTAGTTGTAAATGGACTGATGTTGATGATTACATACTGGCTAATGAATGTACAGAGCGCTTGAAATTGTTTGCTGCAGAAACGCAAAAGGCGACTGAGGAAGCCTTTAAGCAGAGTTATGCATCAGCAACAATACAAGAGATTGTTAGCGAGCGCGAATTGATCCTCTCTTGGGAGATTGGAAAAGTGAAGCCACCACTTAATAAAAATTATGTTTTTACTGGCTACCATTTTACTAAAAATGGCAAGACAGTTTTAGGTGAGTATGTTTTTGATAAGAGTGAGTTGACTAATGGTGTGTATTATCGCGCCACAACCACTTATAAGCTATCTGTAGGAGATGTTTTTGTTTTAACCTCTCATTCAGTAGCTAATTTAAGTGCTCCTACGCTGGTGCCGCAGGAGAATTATAGTAGTATTAGATTCGCTAGTGTTTATAGTGTGCTTGAGACGTTTCAGAACAATGTCGTTAATTATCAACACATTGGTATGAAACGTTATTGCACCGTGCAAGGACCTCCTGGTACAGGAAAGTCACATCTTGCTATTGGTCTTGCTGTTTATTATTGTACAGCACGTGTAGTATACACTGCGGCTAGCCATGCAGCTGTTGACGCATTGTGTGAAAAAGCATACAAATTTTTGAATATAAATGACTGCACTCGTATTGTTCCTGCCAAGGTCAGGGTGGAGTGCTATGATAAGTTTAAAATTAATGACACCACTCGTAAGTATGTGTTTACTACTATAAATGCATTACCTGAGATGGTGACTGATATTGTTGTTGTAGATGAAGTTAGTATGCTTACCAATTATGAGCTTTCTGTTATTAATGCTCGTATTCGTGCTAAGCATTATGTTTACATTGGTGATCCTGCTCAATTGCCAGCACCACGTGTGTTATTGAGCAAGGGTACACTTGAACCTAAATATTTTAACACTGTTACTAAGCTTATGTGTTGCTTAGGGCCAGACATTTTTCTTGGTACATGTTATAGATGTCCTAAGGAAATTGTTGATACAGTGTCTGCCTTGGTTTATGAAAATAAGCTTAAGGCTAAGAATGAAAGTAGTTCATTGTGTTTTAAGGTCTATTATAAAGGCGTTACAACACATGAAAGTTCTAGTGCTGTAAATATGCAGCAGATTTATTTGATTAATAAGTTTTTGAAGGCTAACCCTTTGTGGCATAAAGCCGTTTTTATTAGCCCATATAATAGCCAGAACTTTGCAGCTAAGCGTGTTTTGGGTTTGCAAACCCAGACCGTGGATTCTGCTCAAGGTTCTGAATATGATTATGTTATATATTCACAGACTGCAGAAACAGCGCATTCTGTAAATGTTAATCGCTTCAATGTTGCTATTACTCGAGCCAAGAAAGGTATTCTTTGTGTTATGAGTAATATGCAGTTGTTTGAAGCATTACAGTTTACTACATTGACCTTAGATAAAGTGCCACAGGCCGTTGAAACGAGAGTTCAATGTAGTACCAATTTATTTAAAGATTGTAGCAAGAGTTATAGTGGTTACCACCCAGCTCACGCTCCTTCATTTTTGGCAGTAGATGACAAATATAAGGCAACTGGCGATTTAGCCGTGTGTCTTGGTATTGGAGATTCTGCTGTTACATATTCAAGATTAATATCACTCATGGGTTTTAAACTTGATGTCACCCTTGATGGGTATTGTAAGCTTTTTATAACTAAAGAAGAAGCTGTTAAACGCGTGCGTGCTTGGGTTGGCTTTGATGCTGAAGGCGCTCATGCCACGCGTGATAGCATTGGGACAAATTTCCCACTTCAATTAGGGTTTTCTACAGGAATTGATTTTGTTGTGGAAGCCACTGGTTTGTTTGCTGATAGAGATGGTTACAGCTTTAAAAAGGCTGTGGCTAAAGCTCCTCCTGGTGAACAATTTAAGCATCTCATCCCTTTGATGACGAGAGGTCAGCGCTGGGATGTTGTTAGACCTAGAATAGTACAAATGTTTGCAGATCATTTAATTGATCTGTCTGATTGTGTTGTGCTAGTTACATGGGCAGCCAACTTTGAGCTCACTTGTCTCCGATACTTTGCAAAAGTAGGTCGTGAGATCTCTTGTAATGTGTGCACTAAACGTGCCACAGCTTACAATTCTAGAACTGGTTACTATGGTTGTTGGCGCCATAGTGTTACATGTGATTACTTGTATAATCCACTTATTGTTGATATTCAACAGTGGGGATATATTGGATCTTTATCAAGTAATCATGATTTATATTGTAGTGTCCACAAAGGAGCACATGTTGCTTCATCTGATGCTATAATGACACGGTGTTTGGCCGTTTATGATTGTTTTTGCAATAATATTAATTGGAATGTGGAGTATCCCATTATTTCAAATGAGTTAAGTATTAATACCTCTTGTAGGGTCTTGCAGCGTGTTATGCTTAAAGCTGCAATGCTCTGCAACAGATATACTTTGTGTTATGATATTGGCAACCCAAAAGCGATTGCCTGTGTCAAAGATTTTGATTTTAAGTTCTATGATGCCCAACCAATTGTTAAGTCTGTCAAGACTCTTTTGTATTCTTTTGAGGCACATAAGGACTCTTTTAAAGATGGTTTGTGTATGTTTTGGAACTGTAATGTGGATAAGTATCCACCGAATGCAGTTGTATGTAGATTTGACACGAGAGTGTTGAATAATTTAAATCTTCCTGGCTGTAATGGAGGTAGTTTGTATGTTAATAAACATGCATTCCACACTAAACCCTTTTCTAGGGCAGCCTTTGAGCATTTGAAGCCTATGCCATTTTTCTATTATTCAGATACGCCTTGCGTGTATATGGATGGCATGGATGCTAAGCAGGTTGATTATGTACCTTTGAAATCCGCCACTTGCATCACAAGATGCAATTTAGGTGGTGCAGTTTGTTTAAAACATGCTGAAGAGTATCGTGAGTACCTAGAGTCTTACAATACAGCTACTACAGCAGGTTTTACTTTTTGGGTCTATAAGACATTTGATTTTTATAATTTGTGGAATACGTTCACCAAGCTACAAAGCTTGGAGAATGTTGTATATAATTTAGTCAAAACTGGTCATTATACAGGACAGGCTGGTGAAATGCCTTGTGCCATTATAAATGATAAAGTTGTGGCTAAGATCGATAAGGAGGATGTTGTCATTTTTATTAATAATACAACATACCCTACTAATGTGGCTGTCGAATTATTTGCCAAGCGCAGTATTCGACACCATCCAGAGCTTAAGCTCTTTAGAAATTTGAATATAGACGTGTGTTGGAAGCACGTCATTTGGGATTATGCTAGAGAAAGTATATTTTGCAGTAATACCTATGGTGTCTGCATGTATACAGATTTAAAGTTCATTGATAAATTGAATGTCCTTTTTGATGGTCGTGATAATGGTGCTCTTGAAGCTTTTAAACGCTCTAATAATGGCGTTTACATTTCCACGACAAAAGTTAAGAGTCTTTCGATGATAAAAGGTCCACCGCGTGCTGAATTAAATGGCGTAGTGGTGGACAAGGTTGGAGACACTGATTGTGTGTTTTATTTTGCTGTGCGTAAAGAGGGTCAGGATGTCATCTTCAGCCAATTCGACAGCCTGAGAGTCAGCTCTAACCAGAGCCCACAAGGTAATCTGGGGAGTAATGAACCCGGTAATGTCGGTGGTAATGATGCTCTGGCAACCTCCACTATCTTTACACAAAGCCGTGTTATTAGCTCTTTTACATGTCGTACTGATATGGAAAAAGATTTTATAGCTTTAGATCAAGACTTGTTTATTCAGAAGTATGGTTTGGAGGACTATGCCTTTGAACACATTGTTTATGGTAATTTCAACCAGAAGATTATTGGTGGTTTGCATTTGTTAATAGGCTTGTACCGAAGACAGCAAACTTCCAATCTGGTTATTCAGGAGTTTGTTTCATACGACTCCAGCATACACTCTTATTTTATCACTGATGAGAAGAGTGGTGGTAGTAAGAGTGTTTGCACTGTTATAGATATTTTGTTGGATGATTTTGTGGCTCTTGTTAAGTCACTTAATCTCAACTGTGTGAGTAAGGTTGTTAACGTTAATGTTGATTTTAAAGATTTTCAGTTCATGCTTTGGTGTAACGATGAGAAAGTTATGACTTTCTATCCTCGTTTGCAAGCTGCATCTGACTGGAAGCCTGGTTATTCTATGCCTGTATTATACAAGTATTTGAATTCCCCAATGGAAAGAGTTAGTCTCTGGAATTATGGGAAGCCGGTTACTTTGCCTACAGGCTGTATGATGAATGTTGCTAAGTATACTCAGTTATGTCAATATCTGAATACTACAACATTAGCTGTACCTGTTAATATGCGAGTTTTGCATTTAGGTGCAGGTTCAGAAAAAGGAGTAGCACCGGGTTCTGCAGTTCTTAGGCAGTGGTTGCCTGCTGGTACTATTCTTGTAGATAATGATTTATACCCATTTGTGAGTGACAGTGTCGCTACATATTTTGGGGATTGTATAACCTTACCCTTTGATTGTCAATGGGATTTGATAATTTCTGATATGTATGACCCTATTACTAAGAACATAGGGGAGTACAATGTAAGTAAAGATGGTTTCTTTACATACATTTGTCATATGATTCGCGACAAGTTAGCTCTGGGTGGCAGTGTTGCTATAAAAATAACAGAGTTTTCTTGGAATGCAGAATTATATAAGTTAATGGGGTATTTTGCATTTTGGACGGTTTTCTGCACAAATGCAAACGCTTCTTCTAGTGAAGGGTTTTTAATTGGCATAAATTATTTGGGTAAGCCCAAAGTTGAGATAGATGGAAATGTTATGCATGCCAATTATTTGTTTTGGAGAAATTCCACAGTTTGGAACGGGGGTGCTTATAGCCTGTTTGACATGGCTAAATTCCCGCTTAAGTTGGCTGGTACTGCCGTAATAAATTTAAGAGCAGACCAGATTAATGATATGGTTTATTCCCTTCTTGAAAAGGGTAAACTACTTGTTAGAGATACAAATAAAGAAGTTTTTGTTGGTGACAGTTTGGTTAATGTAATCATGGCAGTCGCTTATGCAGACAAGCCTAATCACTTTATCAATTTTCCACTTACCCAGTTTCAGGGCTTTGTGTTAAATTATAAAGGTTTACAATTTCAACTTCTCGATGAAGGAGTGGATTGTAAAATACAAACAGCGCCTCACATTAGTCTTGCTATGCTGGATATTCAGCCTGAAGACTACAGAAGTGTTGATGTTGCTATTCAAGAAGTTATTGATGATATGCATTGGGGTGAGGGCTTTCAGATTAAATTTGAAAACCCCCATATCCTAGGAAGATGCATAGTTTTAGATGTTAAAGGTGTAGAAGAATTGCATGATGATTTAGTTAATTACATTCGTGATAAAGGTTGTGTTGCTGACCAATCCAGGAAGTGGATTGGACATTGCACCATAGCCCAACTCACTGATGCTGCACTTTCCATTAAGGAAAATGTTGATTTTATAAACAGCATGCAATTCAACTATAAAATCACTATCAATCCCTCATCACCGGCTAGACTTGAAATAGTTAAGCTTGGTGCTGAAAAGAAAGATGGTTTTTATGAAACCATAGCTAGCCACTGGATGGGAATTCGTTTTGAATATAATCCACCCACTGATAAGCTAGCTATGATTATGGGTTATTGTTGTTTAGAAGTGGTGCGTAAAGAGCTAGAAGAAGGTGACCTTCCCGAGAATGATGATGATGCTTGGTTTAAGCTATCGTACCATTATGAAAACAATTCTTGGTTCTTTCGACATGTCTACAGGAAAAGTTCTTATTTCCGTAAGTCTTGTCAAAATTTAGATTGTAATTGTTTGGGGTTTTATGAATCTTCAGTTGAAGAAGACATGTTTTTGATACTTTTAATTTCCTTACCAACGGCTTTTGCTGTTATAGGAGATTTAAAGTGTACTACACTTTCCATTAATGATGTTGACACTGGTGTTCCTTCTATTAGCACTGATACTGTCGATGTTACTAATGGTTTAGGTACTTATTATGTTTTAGATCGTGTGTATTTAAATACTACGTTGTTGCTTAATGGTTATTACCCTACTTCAGGTTCTACATATCGTAATATGGCACTGAAGGGAACTTTACTACTGAGCACACTGTGGTTTAAACCACCTTTTCTTTCTGATTTTACTAATGGTATTTTTGCTAAGGTCAAAAATACCAAGGTTATTAAAGATGGTGTAATGTATAGTGAGTTTCCTGCTATAACTATAGGTAGTACTTTTGTAAATACATCCTATAGTGTGGTAGTACAACCACATACTACCATTTTGGGTAATAAATTACAAGGTTTCTTAGAGATCTCTGTTTGCCAGTATACTATGTGCGAGTACCCAAATACGATTTGTAATCCTAATCTGGGTAATCAACGCGTAGAACTATGGCATTGGGATACAGGTGTTGTTTCCTGTTTATATAAGCGTAATTTCACATATGATGTGAATGCTGATTATTTGTATTTCCATTTTTATCAAGAAGGTGGTACTTTTTATGCATATTTTACAGACACTGGTGTTGTTACTAAGTTTCTGTTTAATGTTTATTTAGGCACGGTGCTCTCACATTATTATGTCATGCCTTTGACTTGTAATAGTGCTCTGACTTTAGAATATTGGGTTACACCCCTCACTTCTAAACAATATCTACTAGCTTTCAATCAAGATGGTGTTATTTTTAATGCTGTTGATTGTAAGAGTGATTTTATGAGTGAGATTAAGTGTAAAACACTATCTATAGCACCATCTACTGGTGTTTATGAATTAAACGGTTACACTGTTCAGCCAATTGCAGATGTTTACCGACGTATACCTAATCTTCCCGATTGCAATATTGAGGCTTGGCTTAATGATAAGTCGGTGCCCTCTCCATTAAATTGGGAACGTAAGACTTTTTCAAATTGTAATTTTAATATGAGCAGCCTGATGTCTTTTATTCAGGCAGACTCATTTACTTGTAATAATATTGATGCTGCTAAGATATATGGTATGTGTTTTTCCAGCATAACTATAGATAAGTTTGCAATACCCAATGGTAGGAAGGTTGACCTACAATTGGGTAATTTGGGTTATTTGCAGTCTTTTAACTATAGAATTGATACTACTGCTACAAGTTGTCAGTTGTATTATAATTTACCTGCTGCTAATGTTTCTGTTAGCAGGTTTAATCCTTCTACTTGGAATAGGAGATTTGGTTTTACAGAACAATCTGTTTTTAAGCCTCAACCTGCAGGTGTTTTTACTGATCATGATGTTGTTTATGCACAACATTGTTTTAAAGCTCCCACAAATTTCTGTCCGTGTAAATTGGATGGGTCTTTGTGTGTAGGTAATGGTCCTGGTATAGATGCTGGTTATAAAACTAGTGGCATAGGCACTTGTCCTGCAGGTACTAATTATTTAACTTGCCATAATGCTGCCCAATGTGATTGTTTGTGCACTCCAGACCCCATTACATCTAAAGCTACAGGGCCTTACAAGTGCCCCCAAACTAAATACTTAGTTGGCATAGGTGAGCACTGTTCGGGTCTTGCTATTAAAAGTGATTATTGTGGAGGTAACCCTTGTAGTTGCCAACCACAAGCATTTTTGGGTTGGTCTGTTGACTCTTGTTTACAAGGGGATAGGTGTAATATTTTTGCTAATTTTATTTTGCATGATGTTAATAGTGGTACTACTTGTTCTACTGATTTACAAAAATCAAACACAGACATAATTCTTGGTGTTTGTGTTAATTATGATCTTTATGGTATTACTGGCCAAGGGATTTTTGTTGAGGTTAATGCGACTTATTATAATAGTTGGCAGAACCTTTTATATGATTCTAATGGTAATCTCTATGGTTTTAGAGACTACTTAACAAATAGAACTTTTATGATTCGTAGTTGCTATAGTGGTCGTGTTTCAGCGGCCTTTCATGCTAACTCTTCCGAACCAGCATTGCTATTTCGGAATATCAAATGCAATTACGTTTTTAATAACACTCTTTCACGACAGCTGCAACCTATTAACTATTTTGATAGCTATCTTGGTTGTGTTGTCAATGCTGATAATAGTACTTCTATTGTTGTTCAAACATGTGATCTCACAGTAGGTAATGGTTACTGTGTGGATTACTCTACAAAAAGACGAAGTCGTAGATCGATTACCACTGGTTATCGGTTTACTAATTTTGAGCCATTTACTGTTAATTCAGTAAATGATAGTTTAGAACCTGTAGGTGGTTTGTATGAAATTCAAATACCTTCAGAGTTTACTATAGGTAATATGGAGGAGTTTATTCAAACAAGCTCTCCTAAAGTTACTATTGATTGTTCTGCTTTTGTCTGTGGTGATTATGCAGCATGTAAATCACAGTTGGTTGAATATGGTAGCTTCTGTGACAATATTAATGCTATACTCACAGAAGTAAATGAATTACTTGACACTACACAGTTGCAAGTAGCTAATAGTTTAATGAATGGTGTCACTCTTAGCACTAAGCTTAAAGATGGCGTTAATTTCAATGTAGACGACATCAATTTTTCCCCTGTATTAGGTTGTTTAGGAAGCGATTGCAATAAAGTTTCCAGTAGATCTGCTATAGAGGACTTACTTTTTTCTAAAGTAAAGTTATCTGATGTCGGTTTCGTTGAGGCTTATAATAATTGTACTGGAGGTGCCGAAATTAGGGACCTCATTTGTGTGCAAAGTTATAATGGTATCAAGGTGTTGCCTCCACTGCTCTCAGAAAATCAGATCAGTGGATACACTTTGGCTGCCACCTCTGCTAGCCTGTTTCCTCCATGGTCAGCAGCAGCAGGTGTACCATTCTATTTAAATGTTCAGTATCGTATTAATGGTATTGGTGTTACCATGGATGTGCTAAGTCAAAATCAAAAGCTTATTGCTAATGCATTTAACAATGCTCTTGGTGCTATCCAGGAAGGGTTTGATGCTACCAATTCTGCTTTAGTTAAAATTCAAGCTGTTGTTAATGCAAATGCTGAAGCTCTTAATAACTTATTGCAACAACTCTCTAATAGATTTGGTGCTATAAGTTCTTCTTTACAAGAAATTCTATCTAGACTGGATGCTCTTGAAGCGCAAGCTCAGATAGACAGACTTATTAATGGGCGTCTTACCGCTCTTAATGCTTATGTTTCTCAACAGCTTAGTGACTCTACACTAGTAAAGTTTAGTGCAGCACAAGCTATGGAGAAGGTTAATGAATGTGTCAAAAGCCAATCATCTAGGATAAATTTTTGTGGTAATGGTAATCATATTATATCATTAGTGCAGAATGCTCCATATGGTTTGTATTTTATCCACTTTAGCTATGTCCCTACTAAGTATGTCACAGCGAAGGTTAGTCCCGGTCTGTGCATTGCTGGTGGTAGAGGTATAGCCCCTAAGAGTGGTTATTTTGTTAATGTAAATAACTCTTGGATGTTCACTGGTAGTGGTTATTACTACCCTGAACCTATAACTGGAAATAATGTTGTTGTTATGAGTACCTGTGCTGTTAATTATACTAAAGCGCCGGATGTAATGCTGAACATTTCAACACCCAACCTCCCTGATTTTAAGGAAGAGTTGGATCAATGGTTTAAAAACCAAACATCAGTGGCACCAGATTTGTCACTTGATTATATAAATGTTACATTCTTGGACCTACAAGATGAAATGAATAGGTTACAGGAGGCAATAAAAGTTTTAAATCAGAGCTACATCAATCTCAAGGACATTGGTACATATGAGTATTATGTAAAATGGCCTTGGTATGTATGGCTTTTAATTGGCTTTGCTGGTGTAGCTATGCTTGTTTTACTATTCTTCATATGCTGTTGTACAGGATGTGGGACTAGTTGTTTTAAGAAATGTGGTGGTTGTTGTGATGATTATACTGGACACCAGGAGTTAGTAATTAAAACATCACATGAAGACATGTTTTTGCTTCCTAGATTTGTTCTAGTTAGCTGCATAATTGGTAGCCTAGGTTTTGACAACCCTCCTACCAATGTTGTTTCGCATTTAAATGGAGATTGGTTTTTATTTGGTGACAGTCGTTCAGATTGTAATCATGTTGTTACTACCAACCCCCGTAATTATTCTTATATGGACCTTAATCCTGCCTTGTGTGGTTCTGGTAAAATATCAGCTAAAGCTGGCAACTCCATTTTTAGGAGTTTTCACTTTACTGATTTTTATAATTACACAGGCGAAGGTCAACAAATTATTTTCTATGAGGGTGTTAATTTTACGCCTTATCATGCCTTTAAATGCACCACTTCTGGTAGTAATGATATTTGGATGCAGAATAAAGGCTTGTTTTACACTCAGGTTTATAAGAATATGGCTGTGTATCGCAGCCTTACTTTTGTTAATGTACCATATGTTTATAATGGCTCTGCACAATCTACAGCCCTTTGTAAATCTGGTAGTTTAGTTCTTAATAACCCTGCATATATAGCTCGTGAAGCTAATTTTGGGGATTATTATTATAAGGTTGAAGCTGATTTTTATTTGTCAGGTTGTGACGAGTATATCGTACCACTTTGTATTTTCAACGGCAAGTTTTTGTCGAATACAAAGTATTATGATGATAGTCAATATTATTTTAATAAAGACACTGGTGTTATTTATGGTCTCAATTCCACTGAAACCATTACCACTGGTTTTGACTTTAATTGTCATTATTTAGTTCTACCCTCTGGTAATTATTTAGCCATTTCAAATGAGCTATTGTTAACTGTTCCTACTAAAGCAATCTGTCTTAATAAGCGTAAGGATTTTACGCCTGTACAGGTTGTTGATTCGCGGTGGAACAATGCCAGGCAGTCTGATAACATGACGGCAGTTGCTTGTCAACCCCCGTACTGTTATTTTCGTAATTCTACTACCAATTATGTTGGTGTTTATGATATCAATCATGGGGATGCTGGTTTTACTAGCATACTCAGTGGTTTGTTATATGACTCACCTTGTTTTTCGCAGCAAGGTGTTTTTAGGTATGATAATGTTAGCAGTGTCTGGCCTCTCTACTCTTATGGCAGATGCCCTACTGCTGCTGATATTAATACCCCTGATGTACCCATTTGTGTGTATGATCCGCTACCAATTATTTTGCTTGGCATTCTTTTGGGTGTTGCGGTCATAATTATTGTAGTTTTGTTGTTATATTTTATGGTGGATAATGGTACTAGGCTGCATGATGCTATGTTTATGGCTGATGCTTATTTTGCAGACACTGTGTGGTATGTGGGGCAAATAATTTTTATAGTTGCCATTTGTTTATTGGTTATAATAGTTGTAGTGGCATTTTTGGCAACTTTTAAATTGTGTATTCAACTTTGCGGTATGTGTAATACCTTAGTACTGTCCCCTTCTATTTATGTGTTTAATAGAGGTAGGCAGTTTTATGAGTTTTACAATGATGTAAAACCACCAGTTCTTGATGTGGATGACGTTATGAGTAGTGTAACTACACCAGCACCAGTTTACACCTGGACTGCTGATGAAGCTATTAAATTCCTAAAGGAATGGAACTTTTCTTTGGGTATTATACTACTTTTTATTACAGTCATATTGCAATTTGGATATACAAGTCGCAGTATGTTTGTTTATGTTATTAAGATGATCATTTTGTGGCTTATGTGGCCCCTTACTATCATCTTAACTATTTTCAATTGCGTGTATGCGTTGAATAATGTGTATCTTGGCTTCTCTATAGTTTTTACTATAGTGGCCATTATCATGTGGATTGTGTATTTTGTGAATAGTATCAGGTTGTTTATTAGAACTGGAAGTTGGTGGAGTTTCAACCCAGAAACAAACAACTTGATGTGTATAGATATGAAGGGAAGGATGTATGTTAGGCCGATAATTGAGGACTACCATACCCTTACGGTCACAATAATACGTGGTCATCTTTACATGCAAGGTATAAAACTAGGTACTGGCTATTCTTTGTCAGATTTGCCAGCTTATGTGACTGTTGCTAAGGTCTCGCACCTGCTCACGTATAAGCGTGGTTTTCTTGACAAGATAGGCGATACTAGTGGTTTTGCTGTTTATGTTAAGTCCAAAGTCGGTAATTACCGACTGCCATCAACCCAAAAGGGTTCTGGCTTGGACACCGCATTGTTGAGAAATAATATCATGTCTTTTACTCCTGGTAAGCAATCCAGTAGTAGAGCGTCCTCTGGAAATCGTTCTGGTAATGGCATCCTTAAGTGGGCCGATCAGTCCGACCAATCTAGAAATGTTCAAACCAGGGGTAGAAGAGCTCAACCCAAGCAAACTGTTACTTCTCAGCAACCATCAGGAGGGAATGTTGTACCCTACTATTCTTGGTTCTCTGGAATTACTCAGTTTCAAAAGGGAAAGGAGTTTGAATTTGCAGAGGGACAAGGTGTGCCTATTGCACCAGGAGTCCCAGCTACTGAAGCTAAGGGGTACTGGTACAGACACAACCGACGTTCCTTTAAAACAGCCGATGGCAACCAGCGTCAATTGCTGCCACGATGGTATTTTTACTATCTTGGAACAGGACCGCATGCCAAAGACCAGTATGGCACCGACATTGACGGAGTCTACTGGGTCGCTAGTAACCAGGCTGATGTCAATACCCCGGCTGACATTCTCGATCGGGACCCAAGTAGCGATGAGGCTATTCCGACTAGGTTTCCGCCTGGCACGGTACTCCCTCAGGGTTACTATATTGAAGGCTCAGGAAGGTCTGCTCCTAATTCCAGATCTACTTCACGCGCATCCAGTAGAGCCTCTAGTGCAGGATCGCGCAGTAGAGCCAATTCTGGCAATAGAACCCCTACCTCTGGTGTAACACCTGATATGGCTGATCAAATTGCTAGTCTTGTTCTGGCAAAACTTGGCAAGGATGCCACTAAGCCACAGCAAGTAACTAAGCAGACTGCCAAAGAAATCAGACAGAAAATTTTGAATAAGCCCCGCCAGAAGAGGAGCCCCAATAAACAATGCACTGTTCAGCAGTGTTTTGGGAAGAGAGGCCCCAATCAGAATTTTGGTGGTGGAGAAATGTTAAAACTTGGAACTAGTGATCCACAGTTCCCCATTCTTGCAGAACTCGCACCCACAGCTGGTGCGTTTTTCTTTGGATCAAGATTAGAGTTGGCCAAAGTGCAGAATTTGTCTGGGAATCTTGACGAGCCCCAGAAGGATGTTTATGAATTGCGCTATAATGGCGCAATTAGATTTGATAGTACACTTTCAGGTTTTGAGACCATAATGAAGGTGTTGAATGAGAATTTGAATGCATACCAACAACAGGATGGTACGATGAATATGAGTCCAAAACCACAGCGTCAGCGTGGTCAGAAGAACGGACAAGGAGAAAATGATAATATAAGTGTTGCAGCGCCCAAAAGCCGTGTGCAGCAAAATAAGATTAGAGAGTTGACTGCAGAGGACATCAGCCTTCTTAAGAAGATGGATGAGCCCTTTACTGAAGACACCTCAGAAATA
>gi|251748075|gb|FJ938063.1|_Bovine_coronavirus_E-DB2-TC_complete_genome
ATGTCGAAGATCAACAAATACGGTCTCGAACTACACTGGGCTCCAGAATTTCCATGGATGTTTGAGGACACAGAGGAGAAGTTGGACAACCCTAGTAGTTCAGAGGTGGATATAGTATGCTCCACCACTGCGCAAAAGCTGGAAACAGGCGGAATTTGTCCTGAAAATCATGTGATGGTGGATTGTCGCCGACTTCTTAAACAAGAGTGTTGTGTGCAGTCTAGCCTAATACGTGAAATTGTTATGAATACACGTCCATATGATTTGGAGGTGCTACTTCAAGATGCTTTGCAGTCCCGCGAAGCAGTTTTGGTTACACCCCCTCTAGGTATGTCTTTGGAGGCATGCTATGTGAGAGGTTGTAATCCTAATGGATGGACCATGGGTTTGTTTCGGCGTAGAAGTGTGTGTAACACTGGTCGCTGCGCTGTTAACAAGCATGTGGCCTATCAGCTATATATGATTGATCCTGCGGGTGTCTGTTTTGGTGCAGGTCAATTTGTGGGTTGGGTTATACCCTTAGCCTTTATGCCTGTGCAATCCCGGAAATTTATTGTTCCTTGGGTTATGTACTTGCGTAAGTGTGGCGAAAAGGGTGCCTACAACAAAGATCATAAACGTGGCGGTTTTGAACACGTTTATAATTTTAAAGTTGAGGATGCTTACGACCTGGTTCATGATGAGCCTAAGGGTAAGTTTTCTAAGAAGGCTTATGCTTTAATTAGAGGATACCGTGGTGTTAAACCGCTTCTTTATGTAGACCAGTATGGTTGTGATTATACTGGTGGTCTTGCAGATGGCTTAGAGGCTTATGCTGATAAGACATTGCAAGAAATGAAGGCATTATTTCCTATTTGGAGCCAGGAACTCCCTTTTGATGTAACTGTGGCATGGCACGTTGTGCGTGATCCACGTTATGTTATGAGACTGCAGAGTGCTTCTACTATACGTAGTGTTGCATATGTTGCTAACCCTACTGAAGACTTGTGTGATGGTTCTGTTGTTATAAAGGAACCTGTGCATGTTTATGCGGATGACTCTATTATTTTACGTCAACATAATTTAGTTGACATTATGAGTTGTTTTTATATGGAGGCAGATGCAGTTGTAAATGCTTTTTATGGTGTTGATTTGAAAGATTGTGGTTTTGTTATGCAGTTTGGTTATATTGACTGCGAACAAGACTTGTGTGATTTTAAAGGTTGGGTTCCTGGTAATATGATAGATGGTTTTGCTTGCACTACTTGTGGTCATGTTTATGAGACAGTTGATTTGCTAGCACAATCTTCAGGTGTTCTGCCTGTTAATCCTGTATTGCATACTAAGAGTGCAGCAGGTTATGGTGGTTTTGGTTGTAAGGATTCTTTTACCCTGTATGGCCAAACTGTAGTTTATTTTGGAGGTTGTGTGTATTGGAGTCCAGCACGTAATATATGGATTCCTATATTAAAATCTTCTGTTAAGTCTTATGACGGTTTGGTTTATACTGGAGTTGTAGGTTGCAAGGCTATTGTAAAGGAAACAAATCTCATTTGCAAAGCGTTGTACCTTGATTATGTTCAACACAAGTGTGGCAATTTACACCAGCGGGAGTTGCTAGGTGTGTCAGATGTGTGGCATAAACAATTGCTATTAAATAGAGGTGTGTACAAACCTCTTTTAGAGAATATTGATTATTTTAATATGCGGCGCGCTAAATTTAGTTTAGAAACTTTTACTGTTTGTGCAGATGGTTTTATGCCTTTTCTTTTAGATGATTTGGTTCCGCGCGCATATTATTTGGCAGTAAGTGGTCAAGCATTTTGTGACTACGCAGGTAAAATCTGCCATGCTGTTGTGTCTAAGAGTAAAGAGTTACTTGATGTGTCTCTGGATTCTTTAAGTGCAGCTATACATTATTTGAATTCTAAAATTGTTGATTTGGCTCAACATTTTAGTGATTTTGGAACAAGTTTYGTTTCTAAAATTGTTCATTTCTTTAAGACTTTTACTACTAGCACTGCTCTTGCATTTGCATGGGTTTTATTTCATGTTTTGCATGGTGCTTATATAGTAGTAGAGAGTGATATATATTTTGTTAAAAACATTCCTCGTTATGCTAGTGCTGTTGCACAAGCATTTCGGAGTGTTGCTAAAGTTGTACTGGACTCCTTAAGAGTTACTTTTATTGATGGCCTTTCTTGTTTTAAGATTGGACGTAGAAGAATTTGTCTCTCAGGCAGTAAAATTTATGAAGTTGAGCGTGGCTTGTTACATTCATCTCAATTGCCATTAGATGTTTATGATTTAACCATGCCTAGTCAAGTTCAGAAAGCCAAGCAAAAACCTATTTATTTAAAAGGTTCTGGTTCTGATTTTTCATTAGCAGATAGTGTGGTTGAAGTTGTTACAACTTCACTTACACCATGTGGTTATTCTGAACCACCTAAAGTTGCAGATAAAATTTGCATTGTGGATAATGTTTATATGGCCAAGGCTGGTGACAAATATTACCCTGTTGTGGTTGATGGTCATGTAGGACTCTTGGATCAAGCATGGAGGGTTCCTTGTGCTGGAAGGCGTGTTACATTTAAGGAACAGCCTACAGTAAATGAGATTGCAAGCACACCTAAGACTATTAAAGTTTTTTATGAGCTTGACAAAGATTTTAATACTATTTTAAACACTGCATGTGGAGTGTTTGAAGTAGATGATACCGTGGATATGGAGGAATTTTATGCTGTGGTGGTTGATGCCATAGAAGAGAAACTTTCTCCATGTAAGGAGCTTGAAGGTGTAGGTGCTAAAGTTAGTGCCTTTTTACAGAAATTAGAGGATAATTCCCTATTTTTATTTGATGAGGCTGGCGAGGAAGTTCTTGCTCCTAAATTGTATTGTGCTTTTACAGCTCCTGAAGATGATGACTTTCTTGAAGAAAGTGGTGTTGAAGAAGATGATGTAGAAGGTGAGGAAACTGATTTAACTGTCACAAGTGCTGGAGAGCCTTGTGTTGCCAGTGAACAGGAGGAGTCTTCTGAAATCTTAGAGGACACTTTGGATGATGGTCCATGTGTGGAGACATCTGATTCACAAGTTGAAGAAGATGTAGAAATGTCGGATTTTGTTGATCTTGAATCTGTGATTCAGGATTATGAAAATGTTTGTTTTGAGTTTTATACTACAGAGCCAGAATTTGTTAAAGTTTTGGATCTGTATGTGCCTAAAGCAACTCGCAACAATTGCTGGTTGCGATCAGTCTTGGCAGTGATGCAGAAACTGCCCTGTCAATTTAAAGATAAAAATTTGCAGGATCTTTGGGTGTTATATAAGCAACAGTATAGTCAGTTGTTTGTTGATACCTTGGTTAATAAGATACCTGCTAATATTGTAGTTCCACAAGGTGGTTATGTTGCCGATTTTGCATATTGGTTCTTAACCTTATGTGATTGGCAGTGTGTTGCATACTGGAAATGCATTAAATGTGATTTAGCTCTTAAGCTTAAAGGCTTGGATGCTATGTTCTTTTATGGTGATGTTGTCTCACATGTGTGCAAGTGTGGTGAGTCTATGGTACTTATTGATGTTGATGTGCCATTTACAGCCCACTTTGCTCTTAAAGATAAGTTGTTTTGTGCATTTATTACTAAGCGTAGTGTGTATAAAGCAGCTTGTGTTGTGGATGTTAATGATAGTCATTCTATGGCTGTTGTTGATGGTAAACAAATTGATGATCATCGTATCACTAGTATTACTAGTGATAAGTTTGATTTTATTATTGGGCATGGTATGTCATTTTCAATGACTACTTTTGAAATTGCCCAATTGTATGGTTCTTGTATAACACCTAATGTATGTTTTGTTAAAGGTGATATAATTAAAGTTTCTAAGCGTGTTAAAGCAGAAGTCGTTGTAAATCCTGCTAACGGCCATATGGCACATGGTGGTGGTGTTGCAAAGGCTATTGCAGTAGCAGCTGGACAGCAGTTTGTTAAAGAGACTACCGATATGGTTAAGTCTAAAGGAGTTTGTGCTACTGGAGACTGTTATGTCTCTACAGGGGGCAAATTATGTAAAACTGTGCTTAATGTTGTTGGACCTGATGCGAGAACACAGGGTAAACAAAGTTATGCATTGTTAGAGCGTGTTTATAAACATCTTAACAAATATGATTGTGTTGTTACAACTTTGATCTCAGCTGGTATATTTAGTGTGCCTTCTGATGTGTCTTTAACATATCTACTTGGTACTGCCAAGAAACAAGTTGTTCTTGTTAGCAATAATCAAGAGGATTTTGATCTTATTTCTAAGTGTCAGATAACTGCCGTTGAGGGCACTAAGAAATTGGCAGAGCGTCTTTCTTTTAATGTAGGGCGTTCTATCGTTTACGAAACAGATGCTAATAAGTTGATTTTAAGCAATGACGTTGCATTTGTTTCGACATTTAATGTTTTACAGGATGTTTTATCCTTAAGACATGATATAGCACTTGATGATGATGCACGAACCTTTGTTCAGAGCAATGTTGATGTTGTACCTGAGGGTTGGCGTGTTGTCAATAAGTTTTATCAAATTAATGGTGTTAGAACCGTTAAGTATTTTGAGTGTCCCGGTGGCATAGATATATGCAGCCAGGATAAAGTTTTTGGTTATGTACAGCAGGGTAGTTTTAATAAGGCTACTGTTGCTCAAATTAAAGCCTTGTTTTTGGATAAAGTGGACATCTTGCTAACTGTTGATGGTGTCAATTTCACTAACAGGTTTGTGCCTGTGGGTGAAAATTTTGGTAAGAGTCTAGGAAATGTGTTCTGTGATGGAGTTAATGTCACGAAACATAAGTGTGATATAAATTATAAAGGTAAAGTCTTTTTCCAGTTTGATAATCTTTCTAGTGAAGATTTAAAGGCTGTAAGAAGTTCTTTTAATTTTGACCAGAAGGAATTGCTTGCCTACTACAACATGCTTGTTAATTGTTCTAAGTGGCAGGTTGTTTTTAATGGTAAGTATTTCACTTTTAAGCAAGCTAATAACAATTGTTTTGTTAATGTTTCTTGCTTAATGCTCCAGAGTTTGAATCTGAAATTTAAAATTGTTCAATGGCAGGAGGCGTGGCTTGAATTTCGTTCTGGCCGCCCTGCTAGATTTGTATCTTTGGTTTTGGCCAAAGGTGGGTTTAAATTTGGGGATCCTGCTGATTCTAGAGATTTCTTGCGTGTTGTGTTTAGTCAAGTTGATTTGACAGGGGCAATATGTGATTTTGAAATTGCATGTAAATGTGGTGTAAAGCAGGAACAGCGTACTGGTGTGGACGCTGTTATGCATTTTGGTACATTGAGTCGTGAAGATCTTGAGATTGGTTACACCGTGGATTGTTCTTGCGGTAAAAAGCTAATTCATTGTGTACGATTTGATGTACCATTTTTAATTTGTAGTAATACACCTGCTAGTGTAAAATTACCTAAGGGTGTAGGAAGTGCAAATATTTTTAAAGGTGATAAGGTTGGTCATTATGTTCATGTTAAGTGTGAACAGTCTTATCAGCTTTATGATGCTTCTAATGTTAAGAAGGTTACAGACGTTACTGGCAATTTGTCAGATTGTTTGTATCTTAAAAATTTGAAACAAACTTTTAAATCGGTGTTAACCACCTATTATTTGGATGATGTTAAGAAACTTGAGTATAAACCTGACTTGTCACAATATTATTGTGACGGAGGTAAGTATTATACTCAGCGTATTATTAAAGCCCAATTTAAAACATTTGAGAAAGTAGATGGTGTGTATACTAATTTTAAATTGATAGGACACACCATCTGTGATATTCTTAATGCTAAGTTGGGTTTTGATAGCTCTAAAGAGTTTGTTGAATATAAAGTTACTGAGTGGCCAACAGCTACAGGTGATGTGGTGTTGGCTACTGATGATTTGTATGTTAAGAGATATGAGAGGGGTTGTATTACTTTTGGTAAACCTGTTATATGGTTAAGCCATGAGCAAGCTTCCCTCAATTCTTTAACATATTTTAATAGACCTTTATTGGTTGATGAGAATAAATTTGATGTTTTAAAAGTGGATGATGTTGACGATGGTGGTGATATCTCAGAGAGTGATGCCAAAGAATCCAAAGAAATCAACATTATTAAGTTAAGTGGTGTTAAAAAACCATTTAAGGTTGAAGATAGTGTCATTGTTAATGATGATACTAGTGAAATCAAATATGTTAAGAGTTTGTCTATAGTTGATGTGTATGATATGTGGCTTACAGGTTGTAGGTATGTTGTTAGGACTGCTAATGCTTTGAGCATGGCAGTTAACGTACCTACAATACGTAAGTTTATAAAATTTGGTATGACTCTTGTTAGTATACCAATTGATTTGTTAAATTTAAGAGAGATTAAGCCTGTTTTTAATGTGGTTAAAGCTGTGCGAAATAAAATTTCTGCATGCTTTAATTTTATTAAATGGCTTTTTGTCTTATTATTTGGCTGGATTAAAATATCCGCTGATAATAAAGTAATTTACACCACAGAAGTTGCATCAAAGCTTACATGTAAGCTTGTAGCTTTAGCTTTTAAAAATGCATTTTTGACATTTAAGTGGAGTGTGGTTGCTAGAGGTGCTTGCATTATAGCGACTATATTTCTATTGTGGTTTAATTTTATATATGCCAATGTAATTTTTAGTGATTTTTATTTGCCTAAAATCGGTTTCTTGCCGACTTTTGTTGGTAAGATCGCACAGTGGATTAAGAACACTTTTAGTCTTGTAACTATTTGTGATCTATATTCCATTCATGATGTGGGTTTTAAGAATCAGTATTGTAATGGAAGTATCGCATGTCAGTTCTGCTTGGCAGGATTTGATATGTTAGATAATTATAAAGCCATTGATGTAGTACAGTATGAAGCTGATAGGAGAGCATTTGTTGATTATACAGGTGTGTTAAAGATTGTCATTGAATTGATAGTTAGTTACGCCCTGTATACGGCATGGTTCTACCCATTGTTTGCTCTTATTAGTATTCAGATCTTGACCACTTGGCTGCCTGAGCTTTTTATGCTTAGTACATTACATTGGAGTGTTAGGTTGCTGGTGTCTTTAGCTAATATGTTACCAGCACATGTGTTTATGAGGTTTTATATTATTATTGCCTCTTTTATTAAGCTGTTTAGCTTGTTTAGGCATGTTGCCTATGGTTGTAGTAAACCTGGTTGTTTGTTTTGTTACAAGAGGAATCGTAGTCTACGTGTTAAATGTAGTACTATTGTTGGTGGCATGATACGCTATTACGATGTTATGGCTAATGGTGGCACTGGCTTTTGTTCAAAACATCAATGGAATTGCATTGATTGTGATTCTTATAAACCAGGTAATACTTTTATTACTGTTGAGGCCGCTCTTGATTTATCTAAGGAATTGAAACGGCCTATTCAGCCTACAGATGTTGCTTATCATACGGTTACGGATGTTAAGCAAGTTGGTTGTTATATGCGCTTGTTCTATGAGCGTGATGGACAGCGCACATATGATGATGTTAATGCTAGTTTGTTTGTGGATTATAGTAATTTGCTACATTCTAAGGTTAAGGGTGTGCCTAATATGCATGTTGTGGTAGTGGAAAATGATGCCGATAAAGCTAATTTTCTTAATGCTGTTGTATTTTATGCACAGTCTTTGTTTAGACCTATTTTAATGGTTGATAAAAATCTGATAACTACTGCTAATACTGGTACGTCTGTTACAGAAACTATGTTTGATGTTTATGTGGACACATTTTTGTCTATGTTTGATGTGGATAAAAAGAGTCTTAATGCTTTAATAGCAACTGCGCATTCTTCTATAAAACAGGGTACGCAGATTTGTAAAGTTTTGGATACCTTTTTAAGCTGTGCTCGTAAAAGTTGTTCTATTGATTCAGATGTTGATACTAAGTGTTTAGCTGATTCTGTCATGTCTGCTGTATCGGCAGGCCTTGAATTGACGGATGAAAGTTGCAATAACTTGGTGCCAACATATTTGAAGGGTGATAACATTGTGGCAGCTGATTTAGGTGTTCTGATTCAAAATTCTGCTAAGCATGTGCAGGGTAATGTTGCTAAAATAGCCGGTGTTTCCTGTATATGGTCTGTGGATGCTTTTAATCAGCTTAGTTCTGATTTCCAGCATAAATTGAAGAAAGCATGTTGTAAAACTGGTTTGAAACTGAAGCTTACTTATAATAAGCAGATGGCTAATGTCTCTGTTTTAACTACACCCTTTAGTCTTAAAGGGGGTGCAGTTTTTAGTTATTTTGTTTATGTATGTTTTGTGTTGAGTTTGGTTTGTTTTATTGGATTGTGGTGCTTAATGCCCACTTACACAGTACACAAATCAGATTTTCAGCTTCCCGTTTATGCCAGTTATAAAGTTTTAGATAATGGTGTTATTAGGGATGTTAGCGTTGAAGATGTTTGTTTCGCTAACAAATTTGAACAATTTGATCAATGGTATGAGTCTACATTTGGTCTAAGTTATTATAGTAACAGTATGGCTTGTCCCATTGTTGTTGCTGTAGTAGACCAGGATCTTGGCTCTACTGTGTTTAATGTCCCTACCAAAGTGTTACGATATGGTTACCATGTGTTGCACTTTATTACACATGCACTTTCTGCTGATGGAGTGCAGTGTTATACGCCACATAGTCAAATATCGTATTCTAATTTTTATGCTAGTGGCTGTGTGCTTTCCTCCGCTTGTACTATGTTTGCAATGGCCGATGGTAGTCCACAACCTTATTGTTATACAGAGGGGCTTATGCAGAACGCTTCTCTGTATAGTTCATTGGTACCTCATGTGCGGTATAATCTTGCTAATGCTAAAGGTTTTATCCGTTTTCCAGAAGTGTTGCGAGAAGGACTTGTGCGTATTGTGCGTACTCGTTCTATGTCGTATTGCAGAGTTGGATTATGTGAGGAAGCTGATGAGGGTATATGCTTTAACTTTAATGGTTCTTGGGTGCTTAATAATGATTATTATAGATCATTGCCTGGGACCTTTTGTGGTAGAGATGTTTTTGACTTAATTTATCAGCTTTTTAAAGGTTTAGCACAGCCTGTGGATTTCTTGGCATTGACTGCTAGTTCTATTGCTGGTGCTATACTTGCTGTAATTGTTGTTTTGGTGTTTTATTACTTAATAAAGCTTAAACGTGCTTTTGGTGATTACACCAGTATTGTTTTTGTTAATGTGATTGTGTGGTGTGTAAATTTTATGATGCTTTTTGTGTTTCAAGTTTACCCTACACTTTCTTGTGTATATGCTATTTGTTATTTTTATGCCACGCTTTATTTCCCTTCGGAGATAAGTGTGATAATGCATTTACAATGGCTAGTTATGTATGGCACTATTATGCCTTTATGGTTTTGTTTGCTATATATATCTGTTGTTGTTTCAAATCATGCTTTTTGGGTATTTGCTTACTGCAGACGGCTTGGTACTTCTGTTCGTAGTGATGGTACATTTGAAGAAATGGCTCTTACTACTTTTATGATTACAAAAGATTCTTATTGTAAGCTTAAGAATTCTTTGTCTGATGTTGCTTTTAATAGATATTTGAGTTTGTATAATAAATATAGGTATTACAGCGGTAAAATGGATACTGCTGCATATAGGGAGGCTGCTTGTTCTCAGTTGGCTAAAGCAATGGATACATTTACCAATAATAATGGTAGTGATGTGCTTTACCAACCACCTACTGCTTCCGTTTCAACTTCATTCTTGCAATCTGGTATTGTGAAAATGGTTAATCCTACTTCTAAGGTAGAACCATGTATTGTCAGTGTTACCTATGGTAATATGACATTGAATGGTTTATGGTTGGATGATAAGGTCTACTGTCCCAGACATGTGATATGTTCTGCTTCAGATATGACTAATCCAGATTATACAAATTTGTTGTGTAGAGTAACATCAAGTGATTTTACTGTATTGTTTGATCGTTTAAGCCTTACAGTGATGTCTTATCAAATGCAGGGTTGTATGCTTGTTCTTACAGTGACCCTGCAAAATTCTCGTACGCCAAAATATACATTTGGTGTGGTTAAACCTGGTGAGACTTTTACTGTTTTAGCTGCTTATAACGGCAAACCACAAGGAGCCTTTCATGTGACTATGCGTAGTAGTTATACCATTAAGGGTTCCTTTTTATGCGGATCTTGTGGATCTGTTGGTTATGTGCTAATGGGTGATTGTGTTAAATTTGTGTATATGCATCAATTGGAGCTTAGTACTGGTTGTCATACTGGTACTGATTTCAATGGGGATTTTTATGGTCCTTATAAGGATGCTCAGGTTGTCCAATTGCCCGTTCAGGATTATATACAATCTGTTAATTTTGTAGCATGGCTTTATGCTGCTATACTTAATAATTGTAATTGGTTTGTACAAAGTGATAAGTGTTCTGTTGAAGATTTTAATGTGTGGGCTTTGTCTAATGGGTTTAGCCAAGTTAAGTCTGATCTTGTTATAGATGCTTTAGCTTCTATGACTGGTGTGTCTTTGGAAACACTATTGGCTGCTATTAAGCGTCTCAAGAATGGTTTTCAAGGACGTCAGATTATGGGTAGTTGCTCCTTTGAGGATGAATTGACACCTAGCGATGTTTATCAACAACTCGCTGGTATCAAGTTACAATCAAAGCGTACTAGATTGGTTAAAGGCATTGTTTGTTGGATTATGGCTTCTACATTTTTGTTTAGTTGTATAATTACAGCATTTGTGAAATGGACTATGTTTATGTATGTAACTACTAATATGCTTAGTATTACGTTTTGTGCACTTTGTGTTATAAGTTTGGCCATGTTGTTGGTTAAACATAAGCATCTTTATTTGACTATGTATATAATTCCTGTGCTTTTTACACTGCTGTATAACAACTATTTGGTTGTGTACAAGCAGACATTTAGAGGCTATGTTTATGCATGGCTATCATATTATGTTCCATCAGTTGAGTATACTTATACTGATGAAGTTATTTATGGCATGTTATTGCTTATAGGAATGGTCTTTGTTACATTACGTAGCATTAACCATGATTTGTTTTCTTTTATAATGTTTGTTGGTCGTGTGATTTCTGTTGTCTCTTTGTGGTACATGGGTTCTAACTTAGAGGAAGAAATTCTTCTTATGTTGGCTTCTCTTTTTGGTACTTACACATGGACAACAGCTTTATCTATGGCTGCAGCAAAGGTTATTGCTAAGTGGGTTGCTGTGAATGTTTTGTATTTCACAGATATACCTCAAATTAAGATAGTGCTTGTATGCTATTTGTTTATAGGTTATATTATTAGCTGTTATTGGGGTTTGTTTTCCTTGATGAACAGTTTGTTTAGAATGCCTTTGGGTGTTTATAATTATAAAATTTCAGTACAGGAATTAAGATATATGAATGCTAATGGATTGCGCCCTCCTAAGAATAGTTTTGAAGCCCTTATGCTTAATTTTAAGCTTTTGGGTATTGGAGGTGTGCCAATTATTGAAGTATCTCAATTTCAATCAAAATTGACTGATGTTAAATGTGCTAACGTTGTCTTGCTTAATTGCTTGCAACATTTGCATGTTGCTTCTAACTCTAAGTTGTGGCAGTATTGTAGCACTTTGCACAATGAAATACTTGCCACTTCTGATCTGGGTGTTGCTTTTGAAAAGCTTGCTCAGTTGTTAATTGTTTTGTTTGCTAATCCAGCTGCTGTGGATAGCAAGTGCCTGACTAGTATTGAAGAAGTTTGCGACGATTACGCAAAGGACAATACTGTTTTGCAGGCTTTACAGAGTGAATTTGTTAATATGGCTAGCTTCGTTGAATATGAAGTTGCTAAGAAAAATCTTGATGAGGCGCGTTCTAGTGGTTCTGCTAATCAACAGCAGTTAAAACAGCTAGAGAAAGCCTGTAATATTGCTAAATCTGCTTATGAACGCGACCGTGCTGTAGCAAGAAAGTTGGAGCGTATGGCAGATTTGGCTCTCACTAATATGTATAAAGAAGCTAGAATTAATGATAAGAAGAGTAAGGTTGTTTCTGCCTTGCAAACTATGCTTTTTAGTATGGTGCGTAAGTTAGATAATCAAGCTCTGAATTCAATATTAGATAATGCTGTGAAGGGTTGTGTACCATTGAATGCAATCCCTTCATTGGCTGCAAATACTCTGACTATAATTGTACCAGATAAAAGTGTTTACGATCAGGTAGTTGACAATGTCTATGTTACCTATGCGGGTAATGTATGGCAGATTCAAACTATCCAAGATTCAGATGGTACAAATAAGCAGTTGAATGAGATATCTGATGATTGTAACTGGCCACTAGTTATTATTGCAAATCGGCATAATGAGGTATCTGCTACCGTTTTGCAAAATAATGAATTAATGCCTGCTAAGTTGAAAACTCAGGTTGTTAATAGTGGTCCAGATCAGACTTGTAACACACCTACTCAATGTTACTATAACAATAGTAACAATGGGAAGATTGTTTATGCTATACTTAGTGATGTTGATGGTCTTAAGTATACAAAAATTCTTAAAGATGATGGCAATTTTGTTGTTTTGGAGTTAGATCCTCCTTGTAAATTTACTGTTCAAGATGTTAAAGGTCTTAAAATTAAGTACCTTTATTTTGTAAAAGGTTGTAACACACTAGCAAGAGGATGGGTTGTTGGTACAATTTCTTCTACAGTTAGATTGCAAGCTGGAACTGCTACTGAGTATGCTTCCAACTCATCTATATTATCTTTATGTGCGTTTTCTGTAGATCCTAAGAAAACGTATTTAGATTTTATACAACAGGGAGGAACACCTATTGCCAATTGTGTTAAAATGTTGTGTGACCATGCTGGTACCGGTATGGCCATTACTGTTAAACCCGATGCTACCACTAGTCAGGATTCATATGGTGGTGCGTCTGTTTGTATATATTGCCGCGCACGAGTTGAACACCCAGATGTTGATGGGTTGTGCAAATTACGCGGCAAGTTTGTACAAGTGCCTGTAGGTATAAAAGATCCTGTGTCTTATGTTTTGACACATGATGTTTGTCAAGTTTGTGGATTTTGGCGGGATGGAAGTTGTTCATGTGTTAGCACTGACACTACTGTTCAGTCAAAAGATACTAATTTTTTAAACCGGGGTACGAGTGTAGATGCCCGTCTCGTACCCTGTGCCAGTGGTTTATCTACTGATGTACAATTAAGGGCATTTGACATTTGCAATGCTAGTGTTGCTGGCATTGGTTTACATTTAAAAGTTAATTGCTGCCGTTTTCAGCGTGTTGATGAGAACGGTGATAAATTAGATCAGTTCTTTGTTGTTAAGAGGACAGATCTGACTATATATAATAGAGAGATGGAATGCTATGAGCGTGTAAAAGATTGTAAGTTTGTGGCTGAACACGATTTCTTTACATTTGATGTAGAAGGTAGTCGTGTGCCACACATTGTACGCAAGGATTTAACAAAGTATACTATGTTGGATCTTTGCTATGCGTTGCGACATTTTGATCGCAATGATTGCATGCTGCTTTGTGACATTCTCTCTATATATGCTGGTTGTGAACAATCCTACTTTACTAAGAAGGATTGGTATGATTTTGTTGAAAATCCTGATATTATTAATGTTTATAAAAAGCTAGGACCTATTTTTAATAGAGCCCTAGTTAGCGCTACTGAGTTTGCAGACAAATTGGTGGAGGTAGGCTTAGTAGGCATTTTAACACTTGATAACCAAGATTTAAATGGTAAATGGTATGATTTTGGTGACTATGTTATTGCAGCCCCAGGGTGTGGTGTTGCTATAGCAGACTCTTATTATTCTTATATGATGCCTATGCTGACCATGTGTCATGCATTGGATTGTGAATTGTATGTGAATAATGCTTATAGACTATTTGATCTTGTACAGTATGATTTTACTGATTACAAGCTCGAATTGTTTAATAAGTATTTTAAGCACTGGAGTATGCCATACCATCCTAACACGGTTGATTGTCAGGATGATCGGTGTATCATACATTGTGCTAATTTTAACATACTTTTTAGTATGGTTTTACCTAATACATGTTTTGGGCCTCTTGTTAGGCAAATTTTTGTGGATGGTGTTCCTTTTGTTGTTTCAATTGGATACCATTATAAAGAACTTGGTATTGTGATGAATATGGATGTGGATACACATCGTTATCGCTTGTCTTTAAAAGACTTGCTTTTATATGCTGCTGATCCAGCTTTGCATGTAGCTTCTGCTAGTGCATTGTATGATTTACGCACTTGCTGTTTTAGTGTTGCGGCTATAACAAGCGGTGTAAAATTTCAAACAGTTAAACCTGGTAATTTTAATCAGGATTTTTATGATTTTATTTTAAGTAAGGGCCTGCTTAAAGAGGGTAGTTCAGTTGACCTGAAGCACTTTTTCTTTACGCAGGATGGTAATGCTGCTATTACTGATTATAATTATTATAAGTACAATTTGCCCACCATGGTGGACATTAAGCAGTTGTTGTTTGTTTTGGAAGTTGTTTATAAGTATTTTGAGATTTATGATGGTGGGTGTATACCGGCATCACAAGTCATTGTTAATAATTATGATAAGAGTGCTGGCTATCCATTTAATAAATTTGGAAAAGCCAGGCTCTATTATGAAGCATTATCATTTGAGGAGCAGGATGAAATTTACGCCTATACTAAGCGCAATGTCCTGCCAACACTTACTCAAATGAATTTGAAATATGCTATTAGTGCTAAGAATAGAGCCCGCACTGTTGCTGGTGTTTCCATACTTAGTACTATGACTGGCAGAATGTTTCATCAAAAATGTTTGAAAAGTATAGCAGCTACACGTGGTGTTCCTGTTGTTATAGGCACCACTAAGTTTTATGGCGGCTGGGATGATATGTTACGTCGCCTTATTAAAGATGTTGATAATCCTGTACTTATGGGTTGGGATTATCCTAAGTGTGATCGTGCTATGCCAAACATACTACGTATTGTTAGTAGTCTGGTTTTGGCTCGAAAACATGAGGCTTGTTGTTCGCAAAGCGATAGGTTTTATCGACTTGCGAATGAATGCGCACAAGTTCTGAGTGAAATTGTTATGTGTGGTGGCTGTTATTATGTTAAGCCTGGTGGCACTAGTAGTGGTGATGCAACTACTGCTTTTGCTAATTCAGTTTTTAACATATGTCAAGCTGTTTCAGCCAATGTATGTGCTTTAATGTCATGCAATGGTAATAAGATTGAAGATTTGAGTATACGTGCTCTTCAGAAGCGCTTATACTCACATGTGTATAGAAGTGATATGGTTGATTCAACCTTTGTCACAGAATATTATGAATTTTTAAATAAGCATTTTAGTATGATGATTTTGAGTGATGATGGCGTTGTGTGTTACAATTCTGATTATGCGTCCAAAGGGTATATTGCTAATATAAGTGCCTTTCAACAGGTATTGTATTATCAAAATAACGTTTTTATGTCAGAATCCAAATGTTGGGTTGAAAATGACATAAACAATGGACCTCATGAATTCTGTTCACAACACACAATGCTTGTAAAGATGGATGGGGACGATGTCTATCTTCCATATCCTGATCCTAGTCGTATATTAGGAGCAGGATGTTTTGTAGATGATTTGTTAAAGACTGATAGTGTTCTTTTAATAGAACGATTTGTAAGTCTTGCAATAGATGCTTATCCACTTGTGTATCACGAAAATGAAGAATACCAAAAGGTTTTTCGTGTTTATTTGGAGTATATAAAGAAGTTGTACAATGACCTGGGTAATCAGATCTTGGATAGCTACAGTGTTATTTTAAGTACTTGTGATGGACAAAAGTTTACTGATGAGTCCTTTTACAAGAACATGTATTTAAGAAGTGCAGTTATGCAGAGTGTTGGAGCTTGCGTGGTCTGCTCTTCTCAAACATCATTACGTTGTGGCAGTTGCATCAGAAAGCCTCTTCTTTGCTGCAAGTGTTGTTACGATCACGTTATGGCAACTGATCATAAATATGTTTTGAGTGTTTCACCGTATGTGTGTAACGCACCAGGATGTGATGTAAATGATGTTACCAAATTGTATCTAGGTGGTATGTCATATTATTGTGAAGATCATAAGCCACAATATTCGTTTAAGTTGGTAATGAATGGTATGGTTTTTGGTTTATATAAACAATCTTGTACAGGATCTCCGTACATAGATGATTTTAATCGTATAGCTAGTTGTAAATGGACTGATGTTGATGATTACATACTGGCTAATGAATGTACAGAGCGCTTGAAATTGTTTGCTGCAGAAACGCAAAAGGCGACTGAGGAAGCCTTTAAGCAGAGTTATGCATCAGCAACAATACAAGAGATTGTTAGCGAGCGCGAATTGATCCTCTCTTGGGAGATTGGAAAAGTGAAGCCACCACTTAATAAAAATTATGTTTTTACTGGCTACCATTTTACTAAAAATGGCAAGACAGTTTTAGGTGAGTATGTTTTTGATAAGAGTGAGTTGACTAATGGTGTGTATTATCGCGCCACAACCACTTATAAGCTATCTGTAGGAGATGTTTTTGTTTTAACCTCTCATTCAGTAGCTAATTTAAGTGCTCCTACGCTTGTGCCGCAGGAGAATTATAGTAGTATTAGATTTGCTAGTGTTTATAGTGTGCTTGAGACGTTTCAGAACAATGTCGTTAATTATCAACACATTGGTATGAAACGTTATTGCACCGTGCAAGGACCTCCTGGTACAGGAAAGTCACATCTTGCTATTGGTCTTGCTGTATATTATTGTACAGCACGTGTAGTATACACTGCGGCTAGCCATGCAGCTGTTGACGCATTGTGTGAAAAAGCATACAAATTTTTGAATATAAATGATTGCACTCGTATTGTTCCTGCTAAGGTCAGGGTGGAGTGCTATGATAAGTTTAAAATTAATGACACCACTCGTAAGTATGTGTTTACTACTATAAATGCATTACCTGAGATGGTGACTGATATTGTTGTTGTAGATGAAGTTAGTATGCTTACCAATTATGAGCTTTCTGTTATTAATGCTCGTATTCGTGCTAAGCATTATGTTTACATTGGTGATCCTGCTCAATTGCCAGCACCACGTGTGTTATTGAGCAAGGGTACACTTGAACCTAAATATTTTAACACTGTTACTAAGCTTATGTGTTGCTTAGGGCCAGACATTTTTCTTGGTACATGTTATAGATGTCCTAAGGAAATCGTTGATACAGTGTCTGCCTTGGTTTATGAAAATAAGCTTAAGGCTAAGAATGAAAGTAGTTCATTGTGTTTTAAGGTCTATTATAAAGGCGTTACAACACATGAAAGTTCTAGTGCTGTAAATATGCAGCAGATTTATTTGATTAATAAGTTTTTGAAGGCTAACCCTTTGTGGCATAAAGCCGTTTTTATTAGCCCATATAATAGCCAGAACTTTGCAGCTAAGCGTGTTTTGGGTTTGCAAACCCAGACCGTGGATTCTGCTCAAGGTTCTGAATATGATTATGTTATATATTCACAGACTGCAGAAACAGCGCATTCTGTAAATGTTAATCGCTTCAATGTTGCTATTACTCGAGCCAAGAAAGGTATTCTTTGTGTTATGAGTAATATGCAGTTGTTTGAAGCATTACAGTTTACTACATTGACCTTAGATAAAGTGCCACAGGCCGTTGAAACGAGAGTTCAATGTAGTACCAATTTATTTAAAGATTGTAGCAAGAGTTATAGTGGTTACCACCCAGCTCATGCTCCTTCATTTTTGGCAGTAGATGACAAATATAAGGCAACTGGCGATTTAGCCGTGTGTCTTGGTATTGGAGATTCTGCTGTTACATATTCAAGATTAATATCACTCATGGGTTTTAAACTTGATGTCACCCTTGATGGGTATTGTAAGCTTTTTATAACTAAAGAAGAAGCTGTTAAACGCGTGCGTGCTTGGGTTGGCTTTGATGCTGAAGGTGCTCATGCCACGCGTGATAGCATTGGGACAAATTTCCCACTTCAATTAGGGTTTTCTACAGGAATTGATTTTGTTGTGGAAGCCACTGGTTTGTTTGCTGATAGAGATGGTTACAGCTTTAAAAAGGCTGTGGCTAAAGCTCCTCCTGGTGAACAATTTAAGCATCTCATCCCTTTGATGACGAGAGGTCAGCGCTGGGATGTTGTTAGACCTAGAATAGTACAAATGTTTGCAGATCATTTAATTGATCTGTCTGATTGTGTTGTGCTAGTTACATGGGCAGCCAACTTTGAGCTCACTTGTCTCCGATACTTTGCAAAAGTAGGTCGTGAGATCTCTTGTAATGTGTGCACTAAACGTGCCACAGCTTACAATTCTAGAACTGGTTACTATGGTTGTTGGCGCCATAGTGTTACATGTGATTACTTGTATAATCCACTTATTGTTGATATTCAACAGTGGGGATATATTGGTTCTTTATCAAGTAATCATGATTTATATTGTAGTGTCCACAAAGGAGCACATGTTGCTTCATCTGATGCTATAATGACACGGTGTTTGGCCGTTTATGATTGTTTTTGCAATAATATTAATTGGAATGTGGAGTATCCCATCATTTCAAATGAGTTAAGTATTAATACCTCTTGTAGGGTCTTGCAGCGTGTTATGCTTAAAGCTGCAATGCTCTGCAACAGATATACTTTGTGTTATGATATTGGCAACCCAAAAGCGATTGCCTGTGTCAAAGATTTTGATTTTAAGTTCTATGATGCCCAACCAATTGTTAAGTCTGTCAAGACTCTTTTGTATTCTTTTGAGGCACATAAGGACTCTTTTAAAGATGGTTTGTGTATGTTTTGGAACTGTAATGTGGATAAGTATCCACCGAATGCAGTTGTATGTAGATTTGACACGAGAGTGTTGAATAATTTAAATCTTCCTGGCTGTAATGGAGGTAGTTTGTATGTTAATAAACATGCATTCCACACTAAACCCTTTTCTAGGGCAGCCTTTGAGCATTTGAAGCCTATGCCATTTTTCTATTATTCAGATACGCCTTGCGTGTATATGGATGGCATGGATGCTAAGCAGGTTGATTATGTACCTTTGAAATCCGCCACTTGCATCACAAGATGCAATTTAGGTGGTGCAGTTTGTTTAAAACATGCTGAAGAGTATCGTGAGTACCTAGAGTCTTACAATACAGCTACTACAGCAGGTTTTACTTTTTGGGTCTATAAGACATTTGATTTTTATAATTTGTGGAATACGTTCACCAAGCTACAAAGCTTGGAGAATGTTGTATATAATTTAGTCAAGACTGGTCATTATACAGGACAGGCTGGTGAAATGCCTTGTGCCATTATAAATGATAAAGTTGTGGCTAAGATCGATAAGGAGGATGTTGTCATTTTTATTAATAATACAACATATCCTACTAATGTGGCTGTTGAATTGTTTGCCAAGCGCAGTATTCGACACCATCCAGAGCTTAAGCTCTTTAGAAATTTGAATATAGACGTGTGCTGGAAGCACGTCATTTGGGATTATGCTAGAGAAAGTATATTTTGCAGTAATACCTATGGTGTCTGCATGTATACAGATTTAAAGTTCATTGATAAATTGAATGTCCTTTTTGATGGTCGTGATAATGGTGCTCTTGAAGCTTTTAAACGCTCTAATAATGGCGTTTACATTTCCACGACAAAAGTTAAGAGTCTTTCGATGATAAAAGGTCCACCGCGTGCTGAATTAAATGGCGTAGTGGTGGACAAGGTTGGAGACACTGATTGTGTGTTTTATTTTGCTGTGCGTAAAGAGGGTCAGGATGTCATCTTCAGCCAATTCGACAGCCTGAGAGTCAGCTCTAACCAGAGCCCACAAGGTAATCTGGGGAGTAATGAACCCGGTAATGTCGGTGGTAATGATGCTCTGGCAACCTCCACTATCTTTACACAAAGCCGTGTTATTAGCTCTTTTACATGTCGTACTGATATGGAAAAAGATTTTATAGCTTTAGATCAAGACGTGTTTATTCAGAAGTATGGTTTGGAGGACTATGCCTTTGAACACATTGTTTATGGTAATTTCAACCAGAAGATTATTGGTGGTTTGCATTTGTTAATAGGCTTGTACCGAAGACAGCAAACTTCCAATCTGGTTATTCAGGAGTTTGTTTCATACGACTCCAGCATACACTCTTATTTTATCACTGATGAGAAGAGTGGTGGTAGTAAGAGTGTTTGCACTGTTATAGATATTTTGTTGGATGATTTTGTGGCTCTTGTCAAGTCACTTAATCTTAACTGTGTGAGTAAGGTTGTTAACGTTAATGTTGATTTTAAAGATTTTCAGTTCATGCTTTGGTGTAACGATGAGAAAGTTATGACTTTCTATCCTCGTTTGCAAGCTGCATCTGACTGGAAGCCTGGTTATTCTATGCCTGTATTATACAAGTATTTGAATTCCCCAATGGAAAGAGTTAGTCTCTGGAATTATGGGAAGCCAGTTACTTTGCCTACAGGCTGTATGATGAATGTTGCTAAGTATACTCAGTTATGTCAATATCTGAATACTACAACATTAGCTGTACCTGTTAATATGCGAGTTTTGCATTTAGGTGCAGGTTCAGAAAAAGGAGTAGCACCGGGTTCTGCAGTTCTTAGGCAGTGGTTGCCTGCTGGTACTATTCTTGTAGATAATGATTTATACCCATTTGTGAGTGACAGTGTCGCTACATATTTTGGGGATTGTATAACCTTACCCTTTGATTGTCAATGGGATTTGATAATTTCTGATATGTATGACCCTATTACTAAGAACATAGGGGAGTACAATGTAAGTAAAGATGGTTTCTTTACATACATTTGTCATATGATTCGCGACAAGTTAGCTCTGGGTGGCAGTGTTGCTATAAAAATAACAGAGTTTTCTTGGAATGCAGAATTATATAAGTTAATGGGGTATTTTGCATTTTGGACGGTTTTCTGCACAAATGCAAACGCTTCTTCTAGTGAAGGGTTTTTAATTGGCATAAATTATTTGGGTAAGCCCAAGGTTGAGATAGATGGAAATGTTATGCATGCCAATTATTTGTTTTGGAGAAATTCCACAGTTTGGAACGGGGGTGCTTATAGCCTGTTTGATATGGCTAAATTCCCGCTTAAGTTGGCTGGTACTGCCGTAATAAATTTAAGAGCAGACCAGATTAATGATATGGTTTATTCCCTTCTTGAAAAGGGTAAACTACTTGTTAGAGATACAAATAAAGAAGTTTTTGTTGGTGACAGTTTGGTTAATGTAATCATGGCAGTCGCTTATGCAGACAAGCCTAATCACTTTATCAATTTTCCACTTACCCAGTTTCAGGGTTTTGTGTTAAATTATAAAGGTTTACAATTTCAACTTCTCGATGAAGGAGTGGATTGTAAAATACAAACAGCGCCTCACATTAGTCTTGCTATGCTGGATATTCAGCCTGAAGACTACAGAAGTGTTGATGTTGCTATTCAAGAAGTTATTGATGACATGCATTGGGGTGAGGGCTTTCAGATTAAATTTGAAAACCCCCATATCCTAGGAAGATGCATAGTTTTAGATGTTAAAGGTGTAGAAGAATTGCATGATGATTTAGTTAATTACATTCGTGATAAAGGTTGTGTTGCTGACCAATCCAGGAAATGGATTGGACATTGCACCATAGCCCAACTCACGGATGCTGCACTTTCCATTAAGGAAAATGTTGATTTTATAAACAGCATGCAATTCAATTATAAAATCACTATCAATCCCTCATCACCGGCTAGACTTGAAATAGTTAAGCTTGGTGCTGTAAAGAAAGATGGTTTTTATGAAACCATAGCTAGCCACTGGATGGGAATTCGTTTTGAATATAATCCACCCACTGATAAGCTAGCTATGATTATGGGTTATTGTTGTTTAGAAGTGGTGCGTAAAGAGCTAGAAGAAGGTGACCTTCCCGAGAATGATGATGATGCTTGGTTTAAGCTATCGTACCATTATGAAAACAATTCTTGGTTCTTTCGACATGTCTACAGGAAAAGTTCTTATTTCCGTAAGTCTTGTCAAAATTTAGATTGTAATTGTTTGGGGTTTTATGAATCTTCAGTTGAAGAAGACATGTTTTTGATACTTTTAATTTCCTTACCAACGGCTTTTGCTGTTATAGGAGATTTAAAGTGTACTACAGTTTCCATTAATGATGTTGACACTGGTGTTCCTTCTATTAGCACTGATACTGTCGATGTTACTAATGGTTTAGGTACTTATTATGTTTTAGATCGTGTGTATTTAAATACTACGTTGTTGCTTAATGGTTACTACCCTACTTCAGGTTCTACATATCGTAATATGGCACTGAAGGGAACTTTACTATTGAGCACACTATGGTTTAAACCACCTTTTCTTTCTGATTTTACTAATGGTATTTTTGCTAAGGTCAAAAATACCAAGGTTATTAAAAATGGTGTAATGTATAGTGAGTTTCCTGCTATAACTATAGGTAGTACTTTTGTAAATACATCCTATAGTGTGGTAGTACAACCACATACTACCAATTTGGATAATAAATTACAAGGTCTCTTAGAGATCTCTGTTTGCCAGTATACTATGTGCGAGTACCCAAATACGATTTGTCATTCTAATCTGGGTAACCGACGCGTAGAATTATGGCATTGGGATACAGGTGTTGTTTCCTGTTTATATAAGCGTAATTTCACATATGATGTGAATGCTGATTACTTGTATTTCCATTTTTATCAAGAAGGTGGTACTTTTTATGCATATTTTACAGACACTGGTGTTGTTACTAAGTTTCTGTTTAATGTTTATTTAGGCACGGTGCTTTCACATTATTATGTCATGCCTTTGACTTGTAATAGTGCTATGACTTTAGAATATTGGGTTACACCTCTCACTTCTAAACAATATCTACTAGCTTTCAATCAAGATGGTGTTATTTTTAATGCTGTTGATTGTAAGAGTGATTTTATGAGTGAGATTAAGTGTAAAACACTATCTATAGCACCATCTACTGGTGTTTATGAATTAAACGGTTACACTGTTCAGCCAATTGCAGATGTTTACCGACGTATACCTAATCTTCCCGATTGTAATATAGAGGCTTGGCTTAATGATAAGTCGGTGCCCTCTCCATTAAATTGGGAACGTAAGACCTTTTCAAATTGTAATTTTAATATGAGCAGCCTGATGTCTTTTATTCAGGCAGACTCATTTACTTGTAATAATATTGATGCTGCTAAGATATATGGTATGTGTTTTTCCAGCATAACTATAGATAAGTTTGCTATACCCAATGGTAGGAAGGTTGACCTACAATTGGGTAATTTGGGCTATTTGCAGTCTTTTAATTATAGAATTGATACTACTGCTACAAGTTGTCAGTTGTATTATAATTTACCTGCTGCTAATGTTTCTGTTAGCAGGTTTAATCCTTCTACTTGGAATAGGAGATTTGGTTTTACAGAACAATCTGTTTTTAAGCCTCAACCTGCAGGTGTTTTTACTGCTCATGATGTTGTTTATGCACAACATTGTTTTAAAGCTCCCACAAATTTCTGTCCGTGTAAATTGGATGGGTCTTTGTGTGTAGGTAATGGTCCTGGTATAGATGCTGGTTATAAAACTAGTGGCATAGGCACTTGTCCTGCAGGTACTAATTATTTAACTTGCCATAATGCTGCCCAATGTAATTGTTTGTGCACTCCAGACCCCATTTCATCTAAAGCTACAGGGCCTTACAAGTGCCCCCAAACTAAATATTTAGTTGGCATAGGTGAGCACTGTTCGGGTCTTGCTATTAAAAGTGATTATTGTGGAGGTAATCCTTGTACTTGCCAACCACAAGCATTTTTGGGTTGGTCTGTTGACTCTTGTTTACAAGGGGATAGGTGTAATATTTTTGCTAATTTTATTTTGCATGATGTTAATAGTGGTACTACTTGTTCTACTGATTTACAAAAATCAAACACAGACATAATTCTTGGTGTTTGTGTTAATTATGATCTTTATGGTATTACTGGCCAAGGTATTTTTGTTGAGGTTAATGCGACTTATTATAATAGTTGGCAGAACCTTTTATATGATTCTAATGGTAATCTCTATGGTTTTAGAGACTACTTAACAAATAGAACTTTTATGATTCGTAGTTGCTATAGCGGTCGTGTTTCAGCGGCCTTTCATGCTAACTCTTCCGAACCAGCATTGCTATTTCGGAATATTAAATGCAATTACGTTTTTAATAATACTCTTTCACGACAGCTGCAACCTATTAACTATTTTGATAGCTATCTTGGTTGTGTTGTCAATGCTGATAATAGTACTTCTAGTGTTGTTCAAACATGTGATCTCACAGTAGGTAGTGGTTACTGTGTGGATTACTCTACAAAAAGACGAAGTCGTAGATCGATTACCACTGGTTATCGGTTTACTAATTTTGAGCCATTTACTGTTAATTCAGTAAATGATAGTTTACAACCTGTAGGTGGTTTGTATGAAATTCAAATACCTTCAGAGTTTACTATAGGTAATATGGAGGAGTTTATTCAAACAAGCTCTCCTAAAGTTACTATTGATTGTTCTGCTTTTGTCTGTGGTGATTATGCAGCATGTAAATCACAGTTGGTTGAATATGGTAGCTTCTGTGACAATATTAATGCTATACTCACAGAAGTAAATGAATTACTTGACACTACACAGTTGCAAGTAGCTAATAGTTTAATGAATGGTGTCACTCTTAGCACTAAGCTTAAAGATGGCGTTAATTTCAATGTAGACGACATCAATTTTTCCCCTGTATTAGGTTGTTTAGGAAGCGATTGCAATAAAGTTTCCAGTAGATCTGCTATAGAGGACTTACTTTTTTCTAAAGTAAAGTTATCTGATGTCGGTTTCGTTGAGGCTTATAATAATTGTACTGGAGGTGCCGAAATTAGGGACCTCATTTGTGTGCAAAGTTATAATGGTATCAAGGTGTTGCCTCCACTGCTCTCAGAAAATCAGATCAGTGGATACACTTTGGCTGCCACCTCTGCTAGTCTGTTTCCTCCTTGGTCAGCAGCAGCAGGTGTACCATTTTATTTAAATGTTCAGTATCGTATTAATGGGATTGGTGTTACCATGGATGTGCTAAGTCAAAATCAAAAGCTTATTGCTAATGCATTTAACAATGCTCTTGGTGCTATTCAGGAAGGGTTTGATGCTACCAATTCTGCTTTAGTTAAAATTCAAGCTGTTGTTAATGCAAATGCTGAAGCTCTTAATAACTTATTGCAACAACTCTCCAATAGRTTTGGTGCTATAAGCTCTTCTTTACAAGAAATTCTATCTAGACTGGATGCTCTTGAAGCGCAAGCTCAGATAGACAGACTTATTAATGGGCGTCTTACCGCTCTTAATGCTTATGTTTCTCAACAGCTTAGTGATTCTACACTAGTAAAATTTAGTGCAGCACAAGCTATGGAGAAGGTTAATGAATGTGTCAAAAGCCAATCATCTAGGATAAATTTTTGTGGTAATGGTAATCATATTATATCATTAGTGCAGAATGCTCCATATGGTTTGTATTTTATCCACTTTAGCTATGTCCCTACTAAGTATGTCACTGCGAAGGTTAGTCCCGGTCTGTGCATTGCTGGTGATAGAGGTATAGCCCCTAAGAGTGGTTATTTTGTTAATGTAAATAATACTTGGATGTTCACTGGTAGTGGTTATTACTACCCTGAACCTATAACTGGAAATAATGTTGTTGTTATGAGTACCTGTGCTGTTAAYTATACTAAAGCGCCGGATGTAATGCTGAACATTTCAACACCCAACCTCCCTGATTTTAAGGAAGAGTTGGATCAATGGTTTAAAAACCAAACATCAGTGGCACCAGATTTGTCACTTGATTATATAAATGTTACATTCTTGGACCTACAAGATGAAATGAATAGGTTACAGGAGGCAATAAAAGTTTTAAATCAGAGCTACATCAATCTCAAGGACATTGGTACTTATGAGTATTATGTAAAATGGCCTTGGTATGTATGGCTTTTAATTGGCTTTGCTGGTGTAGCTATGCTTGTTTTACTATTCTTCATATGCTGTTGTACAGGATGTGGGACTAGTTGTTTTAAGAAATGTGGTGGTTGTTGTGATGATTATACTGGACACCAGGAGTTAGTAATTAAAACATCACATGACGACATGTTTTTGCTTCCTAGATTTGTCCTAGTTAGCTGCATAATTGGTAGCCTAGGTTTTGACAACCCTCCTACCAATGTTGTTTCGCATTTAAATGGAGATTGGTTTTTATTTGGTGACAGTCGTTCAGATTGTAATCATGTTGTTAATACCAACCCCCGTAATTATTCTTATATGGACCTTAATCCTGCCCTGTGTGATTCTGGTAAAATATCATCTAAAGCTGGCAACTCCATTTTTAGGAGTTTTCACTTTACCGATTTTTATAATTACACAGGCGAAGGTCAACAAATTATTTTCTATGAGGGTGTTAATTTTACGCCTTATCATGCCTTTAAATGCACCACTTCTGGTAGTAATGATATTTGGATGCAGAATAAAGGCTTGTTTTACACTCAGGTTTATAAGAATATGGCTGTGTATCGCAGCCTTACTTTTGTTAATGTACCATATGTTTATAATGGCTCTGCACAATCTACAGCTCTTTGTAAATCTGGTAGTTTAGTTCTTAATAACCCTGCATATATAGCTCGTGAAGCTAATTTTGGGGATTATTATTATAAGGTTGAAGCTGATTTTTATTTGTCAGGTTGTGACGAGTATATCGTACCACTTTGTATTTTTAACGGCAAGTTTTTGTCGAATACAAAGTATTATGATGATAGTCAATATTATTTTAATAAAGACACTGGTGTTATTTATGGTCTCAATTCTACTGAAACCATTACCACTGGTTTTGATTTTAATTGTCATTATTTAGTTCTACCCTCTGGTAATTATTTAGCCATTTCAAATGAGCTATTGTTAACTGTTCCTACGAAAGCAATCTGTCTTAATAAGCGTAAGGATTTTACGCCTGTACAGGTTGTTGACTCGCGGTGGAACAATGCCAGGCAGTCTGATAACATGACGGCAGTTGCTTGTCAACCCCCGTACTGTTATTTTCGTAATTCTACTACTAATTATGTTGGTGTTTATGATATCAATCATGGGGATGCTGGTTTTACTAGCATACTCAGTGGTTTGTTATATGACTCACCTTGTTTTTCGCAGCAAGGTGTTTTTAGGTATGATAATGTTAGCAGTGTCTGGCCTCTCTACCCCTATGGCAGATGCCCTACTGCTGCTGATATTAATACCCCTGATGTACCTATTTGTGTGTATGATCCGCTACCAATTATTTTGCTTGGCATTCTTTTGGGTGTTGCGGTCATAATTATTGTAGTTTTGTTGTTATATTTTATGGTGGATAATGGTACTAGGCTGCATGATGCTATGTTTATGGCTGATGCTTATTTTGCAGACACTGTGTGGTATGTGGGGCAAATAATTTTTATAGTTGCCATTTGTTTATTGGTTATAATAGTTGTAGTGGCATTTTTGGCAACTTTTAAATTGTGTATTCAACTTTGCGGTATGTGTAATACCTTAGTACTGTCCCCTTCTATTTATGTGTTTAATAGAGGTAGGCAGTTTTATGAGTTTTACAACGATGTAAAACCACCAGTTCTTGATGTGGATGACGTTATGAGTAGTGTAACTACACCAGCACCAGTTTACACCTGGACTGCTGATGAAGCTATTAAATTCCTAAAGGAATGGAACTTTTCTTTGGGTATTATACTACTTTTTATTACAGTCATATTGCAATTTGGATATACAAGTCGCAGTATGTTTGTTTATGTTATTAAGATGATCATTTTGTGGCTTATGTGGCCCCTTACTATCATCTTAACTATTTTCAATTGCGTGTATGCGTTGAATAATGTGTATCTTGGCTTTTCTATAGTTTTTACTATAGTGGCCATTATCATGTGGATTGTGTATTTTGTGAATAGTATCAGGTTGTTTATTAGAACTGGAAGTTGGTGGAGTTTCAACCCAGAAACAAACAACTTGATGTGTATAGATATGAAGGGAAGGATGTATGTTAGGCCGATAATTGAGGACTACCATACCCTTACRGTCACAATAATACGTGGTCATCTTTACATGCAAGGTATAAAACTAGGTACTGGCTATTCTTTGTCAGATTTGCCAGCTTATGTGACTGTTGCCAAGGTYTCACACCTGCTCACGTATAAGCGTGGTTTTCTTGACAAGATAGGCGATACTAGTGGTTTTGCTGTTTATGTTAAGTCCAAAGTCGGTAATTACCGACTGCCATCAACCCAAAAGGGTTCTGGCATGGACACCGCATTGTTGAGAAATAATATCATGTCTTTTACTCCTGGTAAGCAATCCAGTAGTAGAGCGTCCTCTGGAAATCGTTCTGGTAATGGCATCCTTAAGTGGGCCGATCAGTCCGACCAATCTAGAAATGTTCAAACCAGGGGTAGAAGAGCTCAACCCAAGCAAACTGCTACTTCTCAGCAACCATCAGGAGGGAATGTTGTACCCTACTATTCTTGGTTCTCTGGAATTACTCAGTTTCAAAAGGGAAAGGAGTTTGAATTTGCAGAGGGACAAGGTGTGCCTATTGCACCAGGAGTCCCAGCTACTGAAGCTAARGGGTACTGGTACAGACACAACAGACGTTCCTTTAAAACAGCCGATGGCAACCAGCGTCAATTGCTGCCACGATGGTATTTTTACTATCTTGGAACAGGACCGCATGCCAAAGACCAGTATGGCACCGACATTGACGGAGTCTTCTGGGTCGCTAGTAACCAGGCTGATGTCAATACCCCGGCTGACATTCTCGATCGGGACCCAAGTAGCGATGAGGCTATTCCGACTAGGTTTCCGCCTGGCACGGTACTCCCTCAGGGTTACTATATTGAAGGCTCAGGAAGGTCTGCTCCTAATTCCAGATCTACTTCACGCGCATCCAGTAGAGCCTCTAGTGCAGGATCGCGCAGTAGAGCCAATTCTGGCAATAGAACCCCTACCTCTGGTGTAACACCTGATATGGCTGATCAAATTGCTAGTCTTGTTCTGGCAAAACTTGGCAAGGATGCCACTAAGCCACAGCAAGTAACTAAGCAGACTGCCAAAGAAATCAGACAGAAAATTTTGAATAAGCCCCGCCAGAAGAGGAGCCCCAATAAACAATGCACTGTTCAGCAGTGTTTTGGGAAGAGAGGCCCCAATCAGAATTTTGGTGGTGGAGAAATGTTAAAACTTGGAACTAGTGATCCACAGTTCCCCATTCTTGCAGAACTCGCACCCACAGCTGGTGCGTTTTTCTTTGGATCAAGATTAGAGTTGGCCAAAGTGCAGAATTTGTCTGGGAATCTTGACGAGCCCCAGAAGGATGTTTATGAATTGCGCTATAATGGCGCAATTAGATTTGACAGTACACTTTCAGGTTTTGAGACCATAATGAAGGTGTTGAATGAGAATTTGAATGCATACCAACAACAAGATGGTATGATGAATATGAGTCCAAAACCACAGCGTCAGCGTGGTCAGAAGAATGGACAAGGAGAAAATGATAATATAAGTGTTGCAGCGCCCAAAAGCCGTGTGCAGCAAAATAAGAGTAGAGAGTTGACTGCAGAGGACATCAGCCTTCTTAAGAAGATGGATGAGCCCTTTACTGAAGACACCTCAGAAATA
